# Supplementary material for: Secretome Analysis of Mesenchymal Stem Cell Factors Fostering Oligodendroglial Differentiation of Neural Stem Cells In Vivo
Source: MDPI journal article supplement (doi:10.3390/ijms21124350), 2020-06-18
Supplement: s1 [file s1]

# Secretome analysis of mesenchymal stem cell factors fostering oligodendroglial differentiation of neural stem cells in vivo

Iria Samper Agrelo, Jessica Schira-Heinen, Felix Beyer, Janos Groh, Christine Bütermann, Veronica Estrada, Gereon Poschmann, Ana Bribian, Janusz J. Jadasz, Laura Lopez-Mascaraque, David Kremer, Rudolf Martini, Hans Werner Müller, Hans Peter Hartung, James Adjaye, Kai Stühler and Patrick Küry

## Supplementary Figures S1-S4

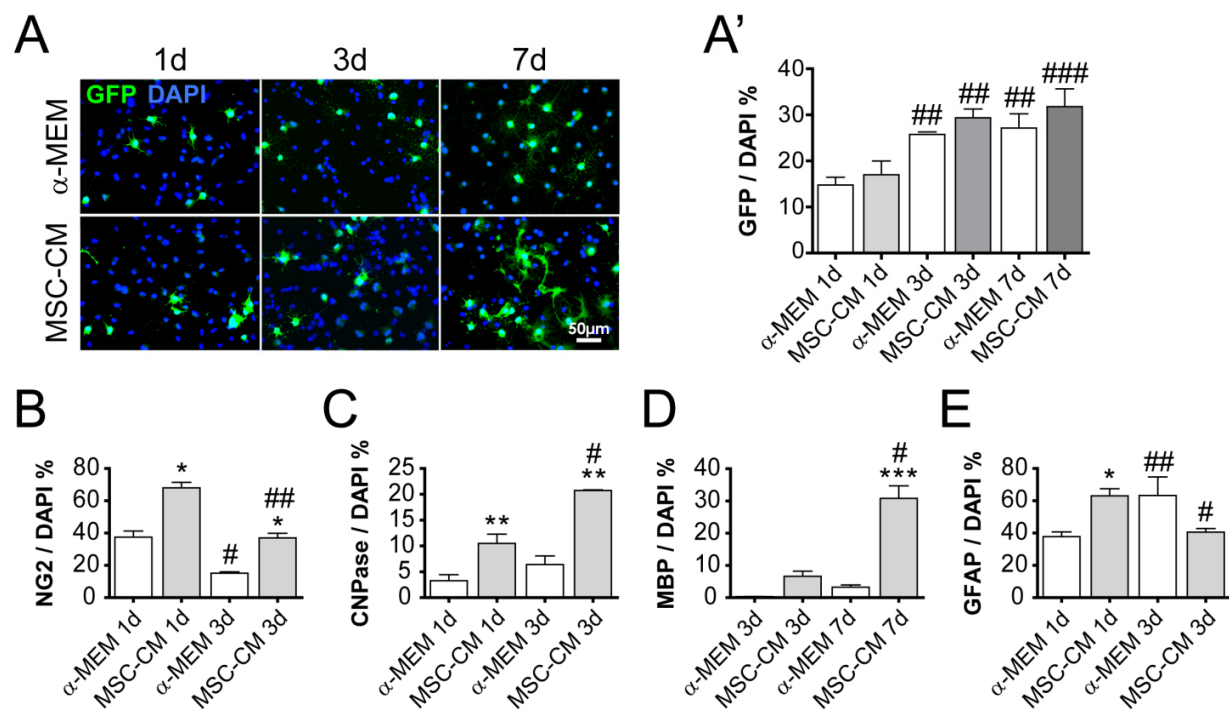

**Figure S1.** Distribution of GFP-PiggyBac transfected cells after MSC-CM stimulation in culture. (A) Immunocytochemical staining of GFP-PiggyBac transfected aNSCs stimulated with  $\alpha$ -MEM or MSC-CM (A') showed the same degree and the same increase over the time of GFP-positive aNSCs under both conditions. NG2- (B), CNPase- (C), MBP- (D) and GFAP-positive (E) cells at 1 and 3 or 7 days after pre-stimulation relative to DAPI-positive nuclei showing the same distribution as previously described for non-transfected aNSCs [20]. Data are shown as mean values  $\pm$  SEM derived from  $n=3$  experiments. For statistical analysis, a two-way ANOVA with Bonferroni posttest was used with a significant threshold set as  $*p \leq 0.05$ ,  $**p \leq 0.01$ ,  $***p \leq 0.001$  for comparison of control to MSC-CM treated cells;  $\#p \leq 0.05$ ,  $##p \leq 0.01$ ,  $###p \leq 0.001$  for comparison of the analyzed time points.

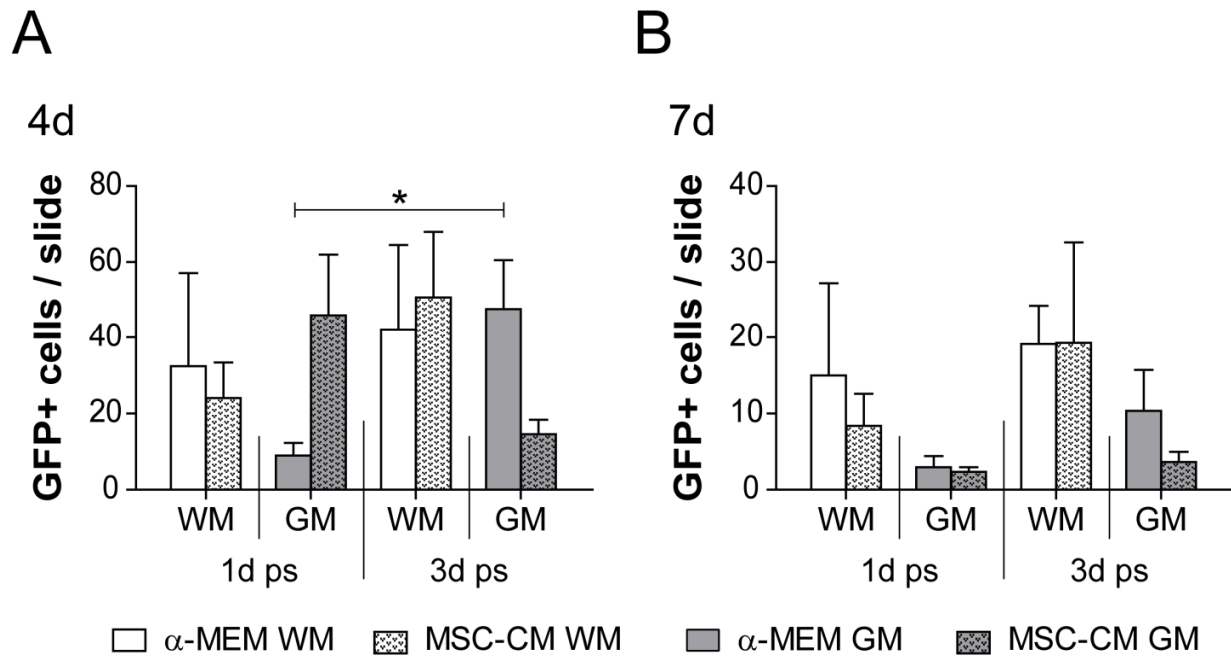

**Figure S2.** Survival rates of GFP-expressing cells after transplantation into the grey and white matter of the mouse brain. In general, no significant difference in the number of GFP-positive cells per slide between grey and white matter was detected after 4 days pt (A) and 7d pt (B) under both conditions and following both pre-stimulation periods. Comparison of 1d to 3d pre-stimulation revealed that  $\alpha$ -MEM treated cells survive better within the grey matter. Statistical significance was calculated using a two-way ANOVA with Bonferroni posttest with a threshold set at \*  $p \leq 0.05$ , compared 1d ps to 3d ps. Animal number (n): 3-5.

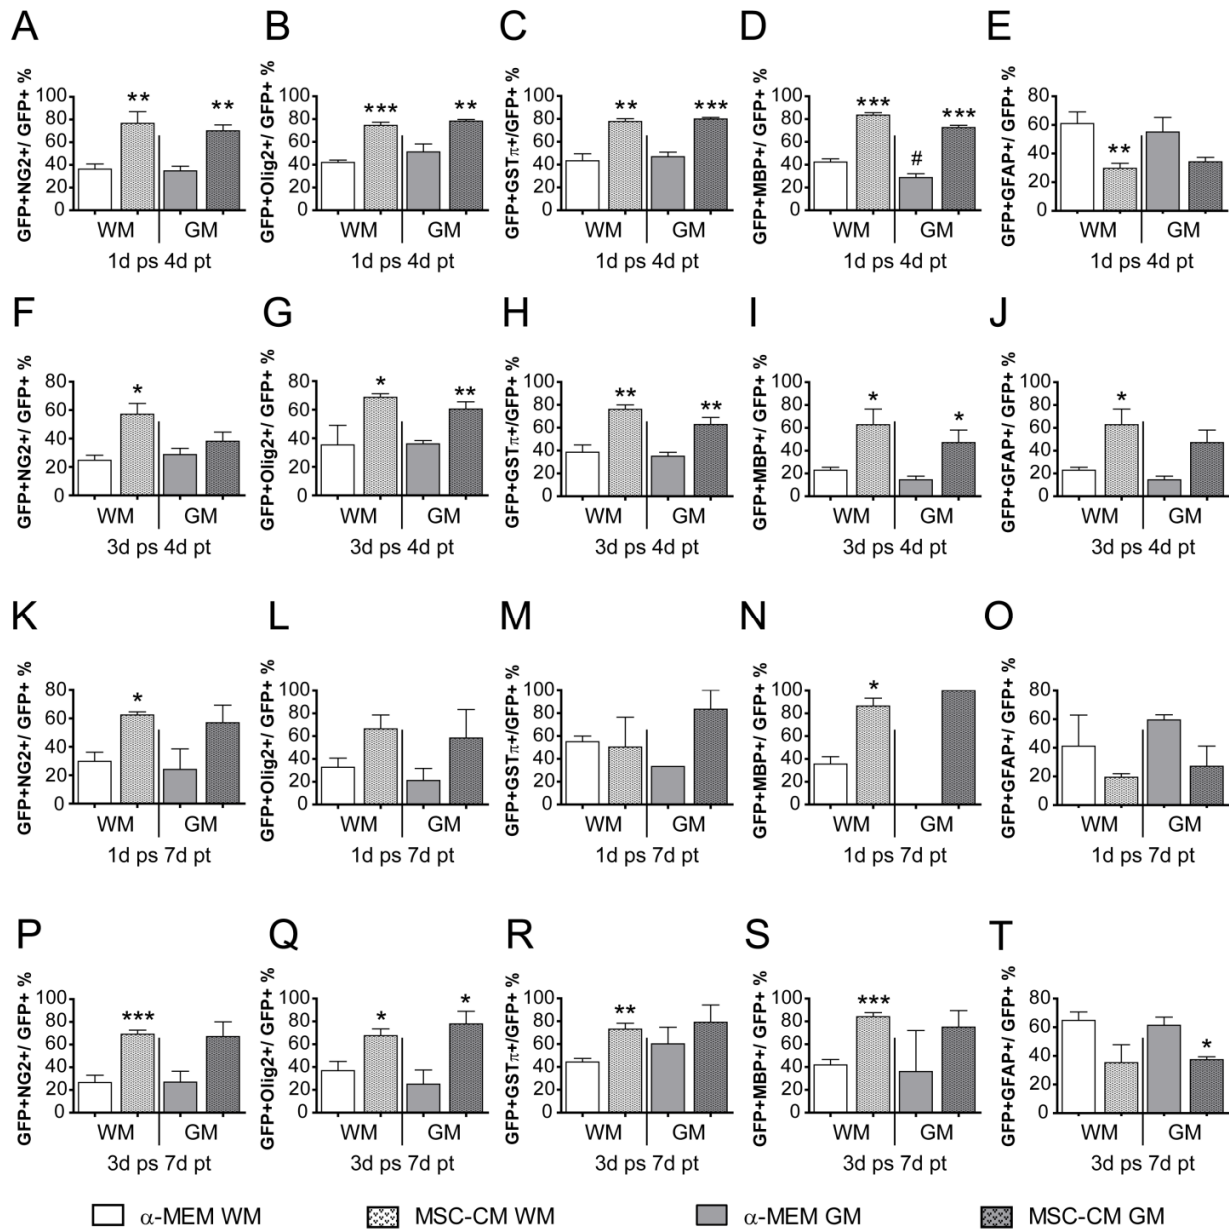

**Figure S3.** MSC-CM pre-stimulated aNSCs differentiate into mature oligodendrocytes independent of their transplantation location. (A-J) Quantitative analysis of GFP-positive cells transplanted either into the grey or white matter of the mouse brain showed no differentiation difference between these two regions after 4 days post transplantation (pt). (K-T) This was also evident for transplanted cells after 7 days pt. For statistical analysis, a two-way ANOVA with Bonferroni posttest was used: \*  $p \leq 0.05$ , \*\*  $p \leq 0.01$ , \*\*\*  $p \leq 0.001$ , MSC-CM compared to the respective  $\alpha$ -MEM control (1 or 3 day pre-stimulation); #  $p \leq 0.05$ , compared white to grey matter ( $\alpha$ -MEM or MSC-CM). Animal numbers (n): 3-5.

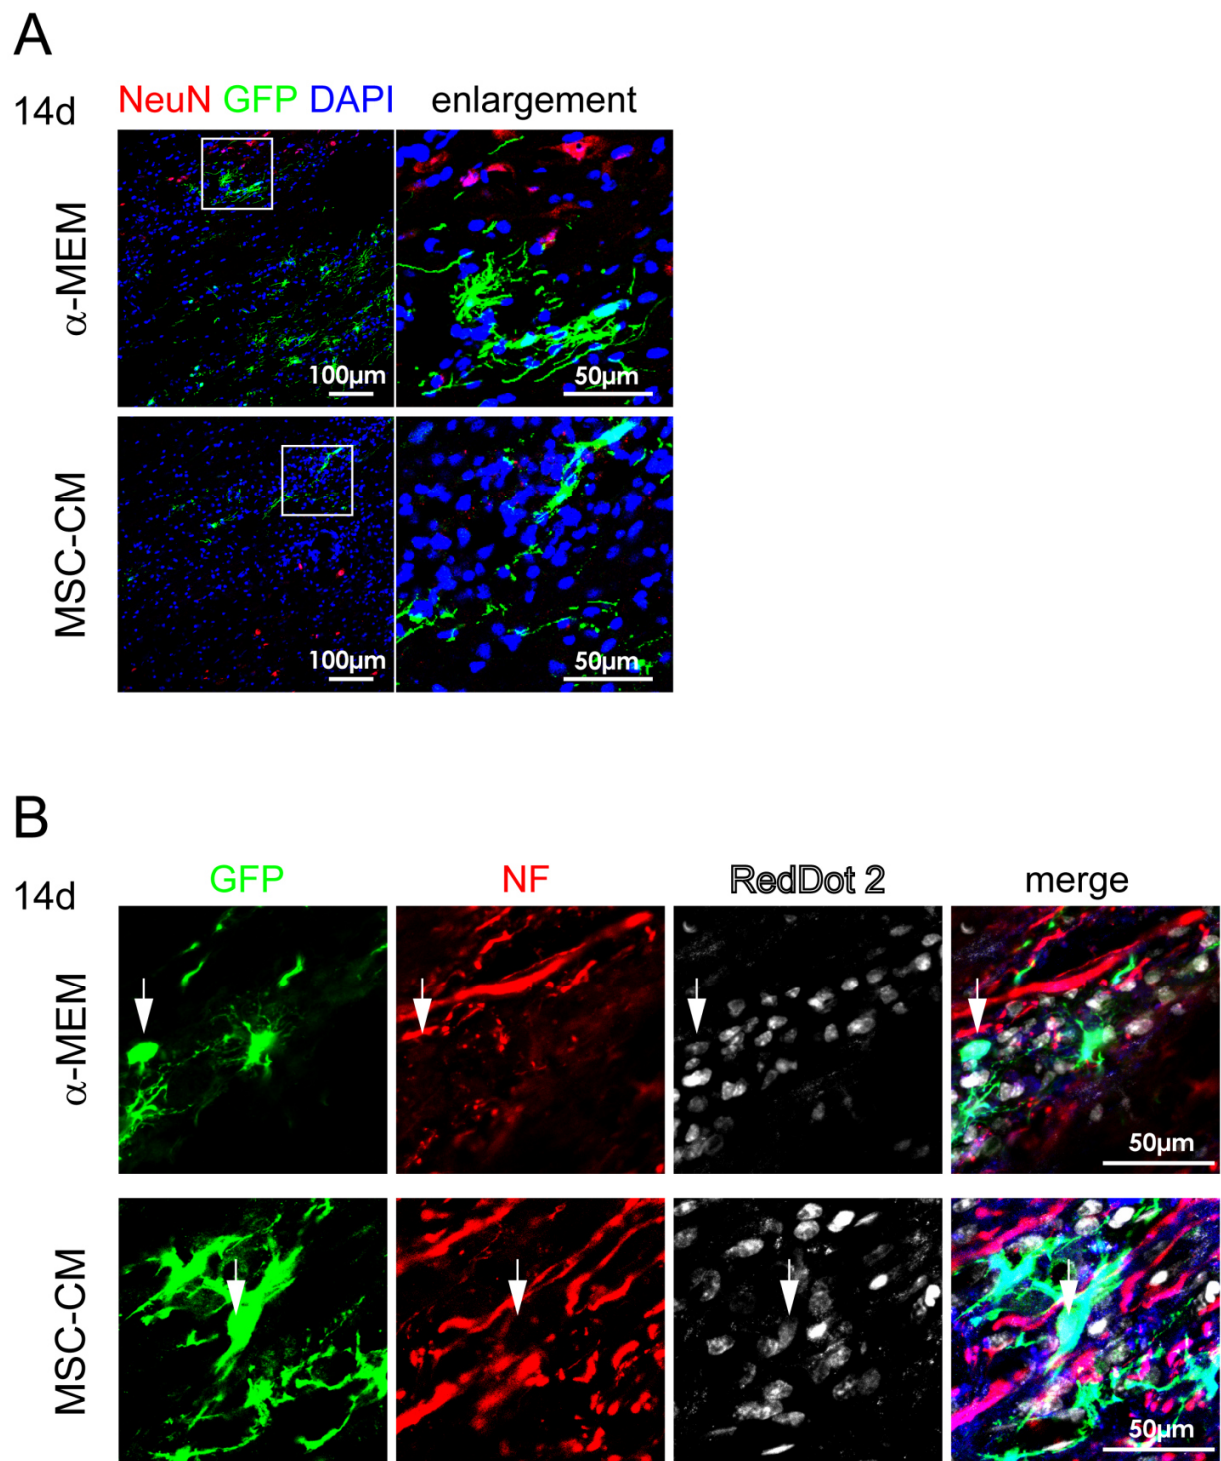

**Figure S4.** Pre-stimulated aNSCs do not differentiate into the neuronal lineage after transplantation into the spinal cord. (A) Representative images of GFP-positive cells (green) revealed no co-localization with NeuN (red) at 14d pt independent of the pre-treatment. (B) Immunohistochemical staining for neurofilament (NF) also revealed no GFP/NF-double positive cells after transplantation into the rat spinal cord. Arrows point to GFP-positive (green) and marker-negative cells. Animal numbers (n): 4-5.
