# Supplementary material for: Secretome Analysis of Mesenchymal Stem Cell Factors Fostering Oligodendroglial Differentiation of Neural Stem Cells In Vivo
Source: Int J Mol Sci. 2020 Jun 18;21(12):4350. doi: 10.3390/ijms21124350 (PMC7352621; doi:10.3390/ijms21124350)
Supplement: Supplementary file 1 [file ijms-21-04350-s001.zip › ijms-829876-supplementary table 1.xlsx]

## Sheet: 191220 MSC JS annotated_
Protein identification data												Protein annotation from UniProt KB				OutCyte prediction						Statistical analysis (SAM / t-test)							Mean		Standard deviation		Valid values		Peptide spectrum matches									Intensity
Protein IDs	Protein names	Gene names	Peptides	Razor + unique peptides	Unique peptides	Sequence coverage [%]	Mol. weight [kDa]	Q-value	Score	Intensity	MS/MS count	SP UniProt annotation	TM UniProt annotation	KDEL motif present	SP, no TM, no KDEL	Outcyte_prediction	OutCyte_score	classes	NC	SP	TM	-Log p-value S_P	q-value S_P	Difference S_P	Test statistic S_P	Significant S_P	enriched in secretome	enriched in proteome	Mean P	Mean S	Standard deviation P	Standard deviation S	Valid values P	Valid values S	MS/MS count P_I	MS/MS count P_II	MS/MS count P_III	MS/MS count P_IV	MS/MS count NC_med	MS/MS count S_I	MS/MS count S_II	MS/MS count S_III	MS/MS count S_IV	Intensity P_I	Intensity P_II	Intensity P_III	Intensity P_IV	Intensity NC_med	Intensity S_I
P33436;E9PSM5	72 kDa type IV collagenase;PEX	Mmp2	44	44	44	71.5	74.149	0	323.31	34000000000	636	+			+	Signal-peptide	0.6889	Signal-peptide	0.0426	0.6889	0.2685	4.5132	0	10.3212	5.98752	+	+		2866040	2642120000	2101250	904073000	4	4	6	4	3	4	0	187	156	125	151	64471000	34765000	22089000	35053000	0	10000000000
Q68EJ2;Q9WUQ1	A disintegrin and metalloproteinase with thrombospondin motifs 1	Adamts1	5	5	5	11.2	105.65	0	76.587	241850000	20	+			+	Transmembrane	0.549	Transmembrane	0.0014	0.4496	0.549	2.23484	0.000157083	4.3631	2.36588	+	+		NA	27547700	NA	7519640	0	3	0	0	0	0	0	8	4	0	8	0	0	0	0	0	77618000
A0A0H2UHL3;A2RUV9	Adipocyte enhancer-binding protein 1	Aebp1	28	28	28	34.1	127.99	0	323.31	2932500000	145	+			+	Signal-peptide	0.9714	Signal-peptide	0.0052	0.9714	0.0234	3.54726	0	7.34256	4.13734	+	+		3504850	232927000	2935130	148205000	2	4	1	0	3	0	0	34	37	40	30	7809800	2798900	6244400	9416300	2605100	707820000
P07897	Aggrecan core protein	Acan	29	29	2	18.2	221.12	0	323.31	1885500000	106	+			+	Signal-peptide	0.9703	Signal-peptide	0.0055	0.9703	0.0242	0.683341	0.00406972	3.563	1.07277	+	+		1791370	203809000	847388	214928000	3	3	3	0	0	0	0	43	54	0	6	18689000	24701000	8948400	15605000	0	849270000
D4A2F1;F1LPF2;P25304	Agrin;Agrin N-terminal 110 kDa subunit;Agrin C-terminal 110 kDa subunit;Agrin C-terminal 90 kDa fragment;Agrin C-terminal 22 kDa fragment	Agrn	18	18	18	14.8	206.59	0	153.33	189990000	36		+			Transmembrane	0.9964	Transmembrane	0.002	0.0015	0.9964	3.63122	0	4.43272	3.23993	+	+		NA	14548000	NA	10839200	0	4	0	0	0	0	0	4	5	19	8	0	0	5955600	0	0	7214100
Q6P6Q5;P08592	Amyloid beta A4 protein;N-APP;Soluble APP-alpha;Soluble APP-beta;C99;Beta-amyloid protein 42;Beta-amyloid protein 40;C83;P3(42);P3(40);C80;Gamma-secretase C-terminal fragment 59;Gamma-secretase C-terminal fragment 57;Gamma-secretase C-terminal fragment 50;C31	App	11	11	11	21.8	82.797	0	134.79	296370000	48	+	+			Signal-peptide	0.9524	Signal-peptide	0.0003	0.9524	0.0473	4.06636	0	4.15569	3.33696	+	+		NA	19374200	NA	3546440	0	4	0	1	0	0	0	13	9	11	14	12969000	16231000	22213000	10794000	0	58318000
A0A0G2K151;P02650	Apolipoprotein E	Apoe	2	2	2	6.4	41.199	0	59.397	68387000	12	+			+	Signal-peptide	0.9054	Signal-peptide	0.0048	0.9054	0.0898	1.78317	0.000372184	2.96434	1.74457	+	+		NA	7009330	NA	3151400	0	3	0	0	0	0	0	5	4	2	1	0	0	0	0	0	30541000
Q99J86	Attractin	Atrn	4	4	4	4.5	158.67	0	8.3547	24552000	11	+	+			Intracellular	0.5637	Intracellular	0.7216	0.0465	0.2319	1.12297	0.0228134	1.01092	0.795569	+	+		NA	2018130	NA	371916	0	3	0	0	0	0	0	4	1	4	2	0	0	0	0	0	7267800
P07151	Beta-2-microglobulin	B2m	6	6	6	69.7	13.72	0	56.117	766230000	32	+			+	Signal-peptide	0.943	Signal-peptide	0.0001	0.943	0.0569	4.85476	0	3.20267	3.04949	+	+		5391100	48756800	1529440	8932980	4	4	1	3	3	2	0	4	9	6	4	32350000	44505000	35880000	45109000	0	236180000
P47853	Biglycan	Bgn	28	28	28	62.6	41.706	0	323.31	88200000000	723	+			+	Signal-peptide	0.9989	Signal-peptide	0.0003	0.9989	0.0008	6.78003	0	7.31984	6.8418	+	+		41586300	6540850000	11930400	1468550000	4	4	10	11	13	8	0	155	143	225	158	339270000	346560000	221480000	154310000	0	20300000000
F1M944;P51868	Calsequestrin;Calsequestrin-2	Casq2	16	16	16	51.5	49.402	0	57.159	554500000	43	+			+	Signal-peptide	0.6353	Signal-peptide	0.1038	0.6353	0.261	1.98703	0.000149733	4.87086	2.29455	+	+		7503100	38070100	NA	41424800	1	4	0	0	2	0	0	6	4	29	2	0	0	55429000	0	0	81400000
Q6Q0N0	Calsyntenin-1;Soluble Alc-alpha;CTF1-alpha	Clstn1	11	11	11	23.1	106.26	0	83.878	852700000	43	+	+			Signal-peptide	0.651	Signal-peptide	0.1354	0.651	0.2136	5.98362	0	5.99991	5.44856	+	+		NA	70336300	NA	18196500	0	4	0	0	0	0	0	7	10	18	8	0	0	0	0	0	353660000
P15087	Carboxypeptidase E	Cpe	22	22	6	58	53.308	0	184.03	2193900000	106	+			+	Signal-peptide	0.763	Signal-peptide	0.0038	0.763	0.2332	3.90862	0	6.86125	4.33101	+	+		NA	184804000	NA	106223000	0	4	0	0	0	0	0	47	33	3	23	0	0	0	0	0	898740000
P07154	Cathepsin L1;Procathepsin L;Cathepsin L1 heavy chain;Cathepsin L1 light chain	Ctsl	10	10	10	48.5	37.66	0	55.976	859270000	52	+			+	Signal-peptide	0.9997	Signal-peptide	0	0.9997	0.0003	5.25063	0	6.30402	5.16146	+	+		NA	65532500	NA	30438000	0	4	0	0	0	0	0	12	13	19	8	0	0	0	0	0	178040000
A0A140TA94;Q63148	Chordin	Chrd	7	7	7	11.3	101.69	0	36.062	63206000	27	+			+	Signal-peptide	0.9925	Signal-peptide	0.0071	0.9925	0.0005	3.13873	8.41e-05	3.1931	2.44798	+	+		NA	5233700	NA	1286590	0	4	0	0	0	0	0	7	9	6	5	0	0	0	0	0	13777000
Q6QD51	Coiled-coil domain-containing protein 80	Ccdc80	23	23	23	28.3	107.69	0	113.8	2493300000	126	+			+	Signal-peptide	0.9975	Signal-peptide	0.0021	0.9975	0.0004	1.25478	0.00108943	2.46069	1.33818	+	+		20322000	162049000	7240870	109157000	4	4	10	13	5	8	0	39	19	1	31	137520000	165110000	40802000	114340000	0	940850000
P02454;CON__Q862S4	Collagen alpha-1(I) chain	Col1a1	105	105	104	84.4	137.95	0	323.31	1060000000000	4212	+			+	Signal-peptide	0.9823	Signal-peptide	0.0006	0.9823	0.0171	5.61585	0	5.75157	5.07547	+	+		1424770000	75300000000	576525000	23903400000	4	4	130	128	190	155	0	830	814	1183	782	9510400000	11200000000	23400000000	8650000000	50741000	213000000000
P13941	Collagen alpha-1(III) chain	Col3a1	79	79	70	69.4	138.93	0	323.31	62700000000	821	+			+	Signal-peptide	0.9335	Signal-peptide	0.0161	0.9335	0.0505	4.59031	0	3.86573	3.40441	+	+		284592000	4029500000	117122000	1075720000	4	4	41	51	62	45	0	190	182	122	128	1881200000	2278400000	4347900000	1355100000	0	17200000000
G3V763;Q9JI03;A0A0G2JX47	Collagen alpha-1(V) chain	Col5a1	54	48	48	42.4	184	0	323.31	13400000000	570	+			+	Signal-peptide	0.9427	Signal-peptide	0.0001	0.9427	0.0572	5.89013	0	3.50859	3.57053	+	+		74413800	857855000	9499170	197540000	4	4	28	32	28	28	0	119	105	144	86	515840000	558330000	564700000	393130000	468660	2782700000
P20909	Collagen alpha-1(XI) chain	Col11a1	66	66	60	55.7	181.02	0	323.31	24800000000	541	+			+	Transmembrane	0.604	Transmembrane	0.0931	0.3029	0.604	4.15981	0	3.65109	3.10279	+	+		120449000	1628800000	26048500	845692000	4	4	25	29	33	39	0	75	65	163	112	533920000	712340000	1160400000	785380000	0	3082800000
F1LS40;A0A0G2KAN1;A0A0G2K5E8;P02466	Collagen alpha-2(I) chain	Col1a2	118	118	118	90.9	129.63	0	323.31	1010000000000	4509	+			+	Transmembrane	0.5172	Transmembrane	0.0429	0.4399	0.5172	5.35549	0	7.57981	5.89311	+	+		482987000	77100000000	389760000	11800000000	4	4	107	99	140	103	0	1006	1003	1128	923	5093100000	6048900000	10300000000	5105700000	3742800	249000000000
Q5FVH0	Complement C1q tumor necrosis factor-related protein 5	C1qtnf5	9	9	9	54.3	25.334	0	42.755	1070000000	81	+			+	Signal-peptide	0.9998	Signal-peptide	0.0002	0.9998	0	4.37791	0.000107692	3.13509	2.85987	+	+		7905530	66882700	3233460	14320100	4	4	1	2	3	8	0	15	8	25	19	38877000	32787000	35871000	103910000	0	143210000
Q9R1E9;Q6IN11	Connective tissue growth factor	Ctgf	11	11	11	40.1	37.756	0	45.201	1583100000	72	+			+	Signal-peptide	0.9857	Signal-peptide	0.0037	0.9857	0.0106	4.51877	0.000155989	2.38489	2.35433	+	+		16524800	88098000	2170220	24457100	4	4	8	7	6	12	0	13	11	7	8	130380000	109960000	117350000	124930000	0	395010000
O88201	C-type lectin domain family 11 member A	Clec11a	12	12	12	37.5	36.387	0	28.617	1289200000	39	+			+	Signal-peptide	0.9225	Signal-peptide	0.074	0.9225	0.0035	3.60235	0	6.6035	3.98608	+	+		NA	104998000	NA	97645300	0	4	0	0	0	0	0	3	3	15	18	0	0	0	0	0	68397000
P14841	Cystatin-C	Cst3	8	8	8	61.4	15.437	0	323.31	5895500000	83	+			+	Signal-peptide	0.9499	Signal-peptide	0.0001	0.9499	0.0499	4.13617	0	8.33311	4.99565	+	+		3064000	453730000	NA	452773000	1	4	0	0	1	0	0	15	10	41	16	0	0	22436000	0	0	741520000
Q99372	Elastin	Eln	21	21	2	63.2	73.329	0	264.85	10200000000	187	+			+	Signal-peptide	0.9945	Signal-peptide	0.0037	0.9945	0.0018	0.713272	0.0021912	4.66608	1.17028	+	+		23350000	1061480000	31658800	927479000	3	3	16	15	0	2	0	79	59	2	14	480920000	163250000	0	4565800	0	5550200000
Q62894	Extracellular matrix protein 1	Ecm1	12	12	12	27.9	63.248	0	34.658	577060000	37	+			+	Signal-peptide	0.9863	Signal-peptide	0.0045	0.9863	0.0092	1.9528	0.000159091	5.58342	2.382	+	+		NA	64007700	NA	25906800	0	3	0	0	0	0	0	14	19	0	4	0	0	0	0	0	257720000
G3V6E7;P50609	Fibromodulin	Fmod	9	9	9	31.1	43.133	0	64.487	1451100000	63	+			+	Signal-peptide	0.9348	Signal-peptide	0.0248	0.9348	0.0404	6.7458	0	7.84519	7.17706	+	+		NA	114782000	NA	42370600	0	4	0	0	0	0	0	14	11	25	13	0	0	0	0	0	239500000
A0A0G2K4G5;Q2Q0I9	Fibronectin type III domain-containing protein 1	Fndc1	19	19	19	19.5	199.64	0	53.802	435150000	71	+			+	Signal-peptide	0.9992	Signal-peptide	0.0001	0.9992	0.0008	4.66908	0	5.62209	4.41688	+	+		NA	35856200	NA	16852000	0	4	0	0	0	0	0	27	19	5	20	1159600	499480	0	0	0	194390000
A0A096P6L8;P04937	Fibronectin;Anastellin	Fn1	156	156	4	71	272.44	0	323.31	582000000000	5838	+			+	Signal-peptide	0.9652	Signal-peptide	0.001	0.9652	0.0338	4.26287	0.000109804	3.24166	2.89222	+	+		3824950000	34058700000	1719530000	5249520000	4	4	351	267	554	372	0	955	966	1289	1084	26800000000	19000000000	58100000000	25800000000	100610000	94600000000
Q9WVH8	Fibulin-5	Fbln5	15	15	15	39.7	50.16	0	323.31	6061400000	179	+			+	Signal-peptide	0.924	Signal-peptide	0.006	0.924	0.0701	3.72505	0	6.58394	4.08526	+	+		7791370	447430000	4003790	169965000	3	4	1	2	5	1	0	49	46	44	31	24187000	26856000	67521000	2600400	0	2024600000
F8WG88;Q62632	Follistatin-related protein 1	Fstl1	21	21	21	37.4	60.673	0	323.31	12000000000	197	+			+	Transmembrane	0.493	Transmembrane	0.4779	0.0292	0.493	6.2132	0	7.09803	6.30421	+	+		7017720	945028000	2578910	259688000	4	4	4	4	2	3	0	47	44	45	48	24684000	76329000	34352000	35979000	0	3824600000
Q99PW7	Follistatin-related protein 3	Fstl3	7	7	7	35.9	27.109	0	14.47	289610000	12	+			+	Signal-peptide	0.8814	Signal-peptide	0.0305	0.8814	0.0881	2.93051	0.0001079	4.53364	2.8612	+	+		NA	22623400	NA	27179000	0	4	0	0	0	0	0	1	1	10	0	0	0	0	0	0	63351000
O70513	Galectin-3-binding protein	Lgals3bp	11	11	11	30.3	63.742	0	180.29	886520000	85	+			+	Signal-peptide	0.9984	Signal-peptide	0.0002	0.9984	0.0015	3.1798	0.000221053	2.80379	2.27011	+	+		8546950	56546800	3907700	16712800	4	4	7	3	4	6	0	16	14	17	18	46118000	21913000	16337000	49179000	0	198440000
G3V7Z4;P07092	Glia-derived nexin	Serpine2	10	10	10	31.7	44.049	0	18.478	227450000	24	+			+	Signal-peptide	0.6149	Signal-peptide	0.2902	0.6149	0.0949	2.25957	0.000153635	4.14462	2.32864	+	+		NA	25302700	NA	7868060	0	3	0	0	0	0	0	11	8	0	5	1626200	0	0	1318800	0	96577000
Q6P7Q2;P35053	Glypican-1;Secreted glypican-1	Gpc1	17	17	17	44.4	61.628	0	116.49	1573300000	98	+			+	Signal-peptide	0.9384	Signal-peptide	0.008	0.9384	0.0536	0.88035	0.0136962	1.4456	0.887555	+	+		22940300	62118500	16116600	42892300	4	4	4	2	18	21	0	7	5	20	21	36104000	69519000	402160000	316600000	0	50547000
G3V8V1;F1LMP7;P23785	Granulins;Acrogranin;Granulin-1;Granulin-2;Granulin-3;Granulin-4;Granulin-5;Granulin-6;Granulin-7	Grn	10	10	10	30.1	65.156	0	323.31	478340000	32	+			+	Signal-peptide	0.9224	Signal-peptide	0.0035	0.9224	0.0741	6.23982	0	6.20096	5.73206	+	+		NA	38522500	NA	7358190	0	4	2	0	1	1	0	12	5	5	6	5598200	0	7065600	3459100	0	162190000
Q63772	Growth arrest-specific protein 6	Gas6	19	19	19	37.7	74.637	0	198.14	1070100000	77	+			+	Signal-peptide	0.9671	Signal-peptide	0.016	0.9671	0.0169	8.69951	0	6.9558	7.54071	+	+		NA	87324300	NA	9524810	0	4	0	0	0	0	0	21	13	18	25	0	0	0	1723200	0	290120000
G3V7S1;Q6WRH9	Immunoglobulin superfamily member 10	Igsf10	9	9	9	6.2	284.48	0	18.728	120190000	25	+			+	Signal-peptide	0.6308	Signal-peptide	0.0774	0.6308	0.2918	1.26715	0.0011047	2.57016	1.37034	+	+		NA	11957300	NA	2379710	0	3	1	1	0	3	0	4	8	0	8	3272900	2463900	0	9114300	0	38973000
P18331	Inhibin beta A chain	Inhba	9	9	9	25.9	47.406	0	15.989	194930000	22	+			+	Signal-peptide	0.8471	Signal-peptide	0.008	0.8471	0.145	2.8821	9.86e-05	4.25989	2.74269	+	+		NA	15984900	NA	10063900	0	4	0	0	0	0	0	14	1	2	5	0	0	0	4201500	0	97519000
P12843	Insulin-like growth factor-binding protein 2	Igfbp2	3	3	3	15.1	32.854	0	86.491	118770000	15	+			+	Signal-peptide	0.9928	Signal-peptide	0	0.9928	0.0072	1.67217	0.000368217	3.11489	1.72409	+	+		NA	12616300	NA	4174850	0	3	0	0	0	0	0	6	4	4	1	0	0	0	0	0	53138000
P15473;A0A0G2K4Q9	Insulin-like growth factor-binding protein 3	Igfbp3	10	10	10	33.2	31.68	0	62.189	1550000000	47	+			+	Signal-peptide	0.7709	Signal-peptide	0.1498	0.7709	0.0793	1.23152	0.000376238	5.83816	1.76584	+	+		NA	170829000	NA	112714000	0	3	0	0	0	0	0	23	18	1	5	0	0	0	0	0	718450000
P21744	Insulin-like growth factor-binding protein 4	Igfbp4	3	3	3	18.1	27.745	0	8.7814	168380000	12	+			+	Signal-peptide	0.9471	Signal-peptide	0.0025	0.9471	0.0504	2.78644	0.000104869	4.75179	2.83357	+	+		NA	14162800	NA	9939810	0	4	0	0	0	0	0	2	3	3	4	0	0	0	0	0	63800000
Q5PQQ8	Integrin beta-like protein 1	Itgbl1	12	12	12	41.7	53.904	0	33.418	638760000	31	+			+	Signal-peptide	0.8494	Signal-peptide	0.0036	0.8494	0.147	1.56048	0.00025084	5.08907	1.98958	+	+		NA	72086300	NA	18527700	0	3	0	0	0	0	0	14	8	0	9	0	0	0	0	0	280790000
P70490;Q1PBJ1;A0A0G2K506	Lactadherin	Mfge8	26	26	26	70.5	47.412	0	182.36	8272700000	240	+			+	Signal-peptide	0.9253	Signal-peptide	0.0073	0.9253	0.0674	3.28915	9.32e-05	3.45377	2.63372	+	+		43187500	533932000	11087900	289908000	4	4	9	7	16	10	0	52	53	66	27	217260000	210780000	429620000	136790000	0	1880000000
P15800;M0R6K0;Q5M7W9	Laminin subunit beta-2	Lamb2	33	33	33	30	196.47	0	238.95	816960000	106	+			+	Signal-peptide	0.9012	Signal-peptide	0.0069	0.9012	0.092	1.86495	0.000207407	4.65077	2.16477	+	+		2777400	60591700	1653920	59928800	2	4	1	1	4	0	0	29	25	43	3	6758200	3998900	44259000	1760400	0	176020000
D3ZAA3;Q00918	Latent-transforming growth factor beta-binding protein 1	Ltbp1	22	22	22	20.4	186.6	0	87.828	1129500000	79	+			+	Signal-peptide	0.998	Signal-peptide	0.0002	0.998	0.0018	2.74509	0.000220472	3.164	2.26818	+	+		7882970	74845000	3668200	44737300	4	4	12	2	8	1	0	20	24	8	4	79363000	40623000	65011000	9733200	0	384720000
A0A0G2KAU7;F1M7L7;A0A0G2K1G5;O35806	Latent-transforming growth factor beta-binding protein 2	Ltbp2	23	23	23	21.1	190.14	0	127.1	1585200000	92	+			+	Signal-peptide	0.8447	Signal-peptide	0.0557	0.8447	0.0996	3.60001	0	6.86263	4.05803	+	+		810207	127948000	391845	114586000	4	4	2	0	1	1	0	43	22	13	10	22977000	13759000	10128000	3803400	0	588890000
P51886;CON__Q05443	Lumican	Lum	10	10	10	36.1	38.279	0	160.58	1292100000	46	+			+	Signal-peptide	0.8807	Signal-peptide	0.0211	0.8807	0.0982	1.29732	0.000363985	4.48985	1.70094	+	+		1961500	142812000	NA	204231000	1	3	0	0	0	1	0	8	6	0	31	0	0	0	6846600	0	118130000
B5DF27;J3QTE1;A0A0G2K4P0	Lysyl oxidase homolog 2	Loxl2	11	11	11	23.6	87.184	0	41.535	476220000	48	+			+	Signal-peptide	0.9668	Signal-peptide	0.001	0.9668	0.0322	2.52978	0.000157746	3.74055	2.37236	+	+		4657050	36004000	66678	24987500	2	4	1	1	0	1	0	14	9	8	14	1717900	2246600	14667000	9333500	0	105780000
A0A0H2UHA1;Q8CHN8	Mannan-binding lectin serine protease 1;Mannan-binding lectin serine protease 1 heavy chain;Mannan-binding lectin serine protease 1 light chain	Masp1	6	6	6	10.9	80.113	0	18.481	131940000	17	+			+	Signal-peptide	0.8282	Signal-peptide	0.0176	0.8282	0.1542	1.88234	0.00029661	3.28432	1.88402	+	+		NA	13475400	NA	14671300	0	3	0	0	0	0	0	4	2	11	0	0	0	0	0	0	10650000
D3Z8U5	Metalloendopeptidase	Tll1	14	14	14	22.3	114.43	0	62.222	207130000	31	+			+	Signal-peptide	0.6796	Signal-peptide	0.0894	0.6796	0.231	3.17703	0	4.88415	3.13322	+	+		NA	17605900	NA	14716500	0	4	0	0	0	0	0	9	6	1	15	0	0	0	0	0	49748000
F1M798	Metalloendopeptidase	Bmp1	8	8	8	10.9	111.65	0	15.566	210890000	26	+			+	Signal-peptide	0.9763	Signal-peptide	0.0009	0.9763	0.0228	3.34232	0	4.46678	3.08793	+	+		NA	17316800	NA	1910740	0	4	0	0	0	0	0	6	7	9	4	0	0	0	0	0	44979000
P30120	Metalloproteinase inhibitor 1	Timp1	9	9	9	61.3	23.793	0	36.209	1341300000	86	+			+	Signal-peptide	0.9996	Signal-peptide	0.0002	0.9996	0.0002	7.34741	0	7.14525	7.06316	+	+		NA	97504200	NA	14578500	0	4	0	0	0	0	0	27	18	21	20	0	0	0	0	0	322630000
P30121	Metalloproteinase inhibitor 2	Timp2	15	15	15	55.9	24.356	0	284.41	6146800000	109	+			+	Signal-peptide	0.9508	Signal-peptide	0.0001	0.9508	0.0491	6.49585	0	9.70036	8.08907	+	+		NA	493330000	NA	83211000	0	4	0	0	0	0	0	34	27	24	24	11515000	10980000	9502600	9242900	0	1624200000
A0A0G2K1P2;Q5RJL6	Meteorin-like protein	Metrnl	4	4	4	17.7	32.678	0	38.21	85234000	13	+			+	Signal-peptide	0.9999	Signal-peptide	0	0.9999	0.0001	4.1899	0	3.42354	2.9797	+	+		NA	6766120	NA	1504850	0	4	0	0	0	0	0	5	1	4	3	0	0	3096700	0	0	16357000
B5DFC9;A0A0G2K3C8;W4VSR4	Nidogen-2	Nid2	44	43	43	52.4	152.97	0	323.31	4426300000	264	+			+	Signal-peptide	0.9128	Signal-peptide	0.0176	0.9128	0.0696	2.26586	0.0001	6.35694	2.76603	+	+		17578500	315850000	25808100	151168000	3	4	3	2	25	0	0	58	59	85	32	19538000	22729000	383620000	0	0	981050000
Q63083	Nucleobindin-1	Nucb1	24	24	24	56.2	53.506	0	165.23	2840000000	183	+			+	Signal-peptide	0.9531	Signal-peptide	0.035	0.9531	0.0119	5.69394	0	3.53923	3.54319	+	+		16203500	186538000	3774810	30118900	4	4	3	11	3	5	0	31	31	53	46	71578000	129030000	60030000	70511000	0	572600000
G3V8H7;B0BNI5	Olfactomedin-like protein 3	Olfml3	16	16	16	56.9	47.219	0	76.442	946780000	65	+			+	Signal-peptide	0.6918	Signal-peptide	0.117	0.6918	0.1912	6.39076	0	6.71981	6.17616	+	+		NA	76196800	NA	19295000	0	4	0	0	0	0	0	15	11	25	14	2381000	0	0	0	0	240820000
P08721	Osteopontin	Spp1	2	2	2	9.1	34.963	0.00044248	4.2429	74008000	7	+			+	Signal-peptide	0.9563	Signal-peptide	0.0053	0.9563	0.0384	1.86989	0.000371457	2.79599	1.73831	+	+		NA	7244100	NA	1900000	0	3	0	0	0	0	0	1	1	3	2	0	0	0	0	0	7217300
Q6AYE5	Out at first protein homolog	Oaf	13	13	13	41.5	31.775	0	146.08	808560000	62	+			+	Signal-peptide	0.8906	Signal-peptide	0.0012	0.8906	0.1082	5.99459	0	6.54395	5.80598	+	+		NA	66709500	NA	6922420	0	4	0	0	0	0	0	15	17	16	14	0	0	0	0	0	186630000
P14925	Peptidyl-glycine alpha-amidating monooxygenase;Peptidylglycine alpha-hydroxylating monooxygenase;Peptidyl-alpha-hydroxyglycine alpha-amidating lyase	Pam	10	10	10	19.3	108.67	0	54.337	320020000	55	+	+			Signal-peptide	0.9547	Signal-peptide	0	0.9547	0.0453	5.97674	0	5.30015	4.96838	+	+		546927	24608500	64414.2	7933390	3	4	0	0	2	2	0	12	11	16	12	2586300	5750000	7381600	3814200	0	70341000
P20961;F1LM16	Plasminogen activator inhibitor 1	Serpine1	21	21	21	63.4	45.009	0	182.24	2571200000	181	+			+	Signal-peptide	0.8468	Signal-peptide	0.0066	0.8468	0.1467	3.79435	0	6.58796	4.14546	+	+		4666800	184708000	2636940	56741600	2	4	3	3	0	1	0	61	41	47	25	14323000	28816000	0	1223600	0	795660000
A0A0G2JTE4;Q9EQX6	Platelet-derived growth factor C;Platelet-derived growth factor C, latent form;Platelet-derived growth factor C, receptor-binding form	Pdgfc	3	3	3	17.1	35.578	0	13.198	33777000	5	+			+	UPS	0.5712	Intracellular	0.9675	0.0052	0.0272	2.03007	0.000846154	1.98112	1.49401	+	+		NA	3811870	NA	1814310	0	3	0	0	0	0	0	4	1	0	0	0	0	0	0	0	15428000
Q5RJP7	Platelet-derived growth factor receptor-like protein	Pdgfrl	12	12	12	44.3	41.932	0	160.98	1446300000	135	+			+	Signal-peptide	0.9753	Signal-peptide	0.0004	0.9753	0.0242	6.50337	0	7.55913	6.80897	+	+		NA	115782000	NA	35131500	0	4	4	0	0	0	0	29	28	31	43	4421500	0	0	0	2056300	270010000
O08628;Q5RJN2	Procollagen C-endopeptidase enhancer 1	Pcolce	25	25	25	71.8	50.184	0	323.31	20200000000	371	+			+	Signal-peptide	0.8316	Signal-peptide	0.0068	0.8316	0.1616	6.42622	0	5.73489	5.50133	+	+		28301000	1517800000	5660310	379102000	4	4	21	18	12	9	0	89	76	82	64	250600000	295880000	272070000	148300000	0	5406100000
D3ZQ74;Q63321	Procollagen-lysine,2-oxoglutarate 5-dioxygenase 1	Plod1	29	29	29	49.9	83.612	0	212.46	4377100000	248	+			+	Signal-peptide	0.9893	Signal-peptide	0.0006	0.9893	0.0101	3.44283	0.00115713	1.29058	1.31825	+	+		64619300	155712000	15447500	17611200	4	4	26	24	36	19	0	40	32	34	37	489170000	653540000	1006300000	415630000	0	470160000
P41413	Proprotein convertase subtilisin/kexin type 5	Pcsk5	7	7	7	8.2	201.31	0	24.92	151930000	26	+	+			Signal-peptide	0.5505	Signal-peptide	0.0788	0.5505	0.3707	3.1053	0.000103131	4.10099	2.81418	+	+		NA	12513100	NA	5380320	0	4	0	0	0	0	0	10	9	5	2	0	0	1546100	0	0	49333000
Q6P7B4	Protein FAM198B	Fam198b	9	9	9	26.6	58.205	0	37.134	297870000	40		+			Transmembrane	0.9562	Transmembrane	0.0256	0.0181	0.9562	4.95306	0	4.66771	4.0561	+	+		925594	20065500	205132	5669020	3	4	2	0	1	1	0	10	6	14	6	5860500	3463400	11516000	2871900	0	76271000
Q9QZQ5	Protein NOV homolog	Nov	10	10	10	48.1	38.509	0	74.674	551340000	41	+			+	Signal-peptide	0.9673	Signal-peptide	0.0109	0.9673	0.0218	4.26161	0	6.0829	4.33774	+	+		NA	45062000	NA	20916300	0	4	0	0	0	0	0	10	16	6	9	0	0	0	1806900	0	198970000
P16636	Protein-lysine 6-oxidase	Lox	10	10	10	50.6	46.558	0	157.58	802920000	60	+			+	Signal-peptide	0.8537	Signal-peptide	0.1396	0.8537	0.0067	2.68482	0.000163982	3.6491	2.42422	+	+		6916670	52648200	2493800	6539520	3	4	1	1	4	5	0	14	10	13	12	5243600	15484000	80344000	54089000	0	166180000
Q6AXS4	Renin receptor	Atp6ap2	3	3	3	13.1	39.081	0	10.815	32342000	7	+	+			Signal-peptide	0.7985	Signal-peptide	0.1231	0.7985	0.0783	1.69399	0.00181595	1.58055	1.21172	+	+		NA	2778970	NA	765613	0	3	0	0	0	0	0	2	1	4	0	1721400	2215900	0	0	0	6447000
O55004	Ribonuclease 4	Rnase4	6	6	6	53.7	16.903	0	20.728	429650000	30	+			+	Signal-peptide	0.9989	Signal-peptide	0	0.9989	0.0011	6.25695	0	6.66054	6.05127	+	+		NA	34719200	NA	8341150	0	4	0	0	0	0	0	8	5	10	7	0	0	0	0	0	83676000
Q9QZK5	Serine protease HTRA1	Htra1	20	20	20	68.1	51.33	0	323.31	3815400000	159	+			+	Signal-peptide	0.9982	Signal-peptide	0	0.9982	0.0018	2.339	0.000848379	1.83577	1.50785	+	+		52558700	182012000	22442600	61516000	4	4	13	20	11	15	0	30	21	28	21	379910000	588620000	205540000	284030000	0	724630000
B2DD29	Serine/threonine-protein kinase BRSK1	Brsk1	2	2	2	5.4	85.182	0.0090416	2.1448	389550000	5					Intracellular	0.8798	Intracellular	0.9574	0.0002	0.0424	1.9792	0.000196262	3.82645	2.07569	+	+		NA	20807200	NA	31163800	0	4	0	0	1	0	0	3	0	1	0	3099900	876360	1324100	24972000	89697000	147590000
A0A0G2QC06;Q4FZX7;P12346	Signal recognition particle receptor subunit beta	Srprb	9	9	9	13.1	107.41	0	302.9	50200000000	137	+	+			Signal-peptide	0.917	Signal-peptide	0.0068	0.917	0.0762	5.07885	0	11.6588	7.13619	+	+		NA	3093970000	NA	1787010000	0	4	7	6	10	7	18	24	26	9	30	67174000	64412000	107640000	42678000	14500000000	11900000000
O88280;F1LQL9	Slit homolog 3 protein	Slit3	12	12	12	12.8	167.77	0	28.753	210070000	24	+			+	Signal-peptide	0.9563	Signal-peptide	0.0096	0.9563	0.0341	1.28482	0.00127809	2.21638	1.29155	+	+		5261900	9067530	457070	2919400	2	4	4	4	0	0	0	6	5	4	1	37228000	33074000	13643000	12475000	0	35041000
P16975	SPARC	Sparc	16	16	16	61.1	34.296	0	323.31	54100000000	673	+			+	Signal-peptide	0.9991	Signal-peptide	0.0001	0.9991	0.0008	4.0213	0	4.46402	3.46786	+	+		141663000	3550420000	14328200	1616400000	4	4	30	19	19	25	0	201	154	56	169	1215300000	1274600000	1524400000	1028400000	0	14800000000
F7EPE0;P10960	Sulfated glycoprotein 1	Psap	6	6	6	16.3	61.453	0	29.189	315050000	27	+			+	Signal-peptide	0.987	Signal-peptide	0.0004	0.987	0.0126	2.06381	0.000197415	3.67998	2.09067	+	+		6216900	14629300	NA	5326970	1	4	0	0	2	0	0	7	5	9	4	11081000	20354000	91216000	10908000	0	66615000
Q6IUU3	Sulfhydryl oxidase 1	Qsox1	21	21	21	39.1	82.411	0	120.97	1225800000	105	+	+			Signal-peptide	0.9531	Signal-peptide	0.0001	0.9531	0.0468	4.96494	0	6.46782	5.03805	+	+		NA	98299500	NA	37182400	0	4	0	0	0	0	0	21	20	42	22	0	0	0	0	0	247230000
Q63769	Sushi repeat-containing protein SRPX	Srpx	16	16	16	47	51.559	0	39.014	598450000	92	+			+	Signal-peptide	0.9674	Signal-peptide	0.001	0.9674	0.0317	2.87368	0.000213198	2.92259	2.2163	+	+		4972020	33912500	2538390	9932820	4	4	9	6	0	3	0	18	23	26	7	71557000	40073000	12278000	27843000	0	121690000
B5DF94	Sushi repeat-containing protein SRPX2	Srpx2	11	11	11	30.3	52.852	0	30.666	475030000	31	+			+	Signal-peptide	0.9947	Signal-peptide	0.0003	0.9947	0.005	3.93388	0	5.14647	3.72349	+	+		NA	28972300	NA	14566100	0	4	0	0	0	0	0	5	6	18	2	19253000	20836000	20868000	11328000	0	50848000
A0A0G2JUE3;F1LPU2;P0C6B8	Sushi, von Willebrand factor type A, EGF and pentraxin domain-containing protein 1	Svep1	50	50	50	22.7	400.39	0	323.31	1705900000	193	+			+	Intracellular	0.6603	Intracellular	0.9491	0	0.0509	5.44169	0	7.13984	5.74504	+	+		NA	140758000	NA	34508000	0	4	0	0	0	0	0	66	52	36	39	0	0	10085000	3751800	0	582900000
Q9JI92	Syntenin-1	Sdcbp	7	7	7	35.3	32.423	0	26.396	189250000	25					UPS	0.6102	Intracellular	0.9724	0.0003	0.0272	2.50765	0.000188764	2.75916	2.00095	+	+		2309300	11360700	822643	4353740	3	4	0	0	0	2	0	4	3	10	6	16534000	8236500	3817200	8993900	0	25166000
F1LMS5;A0A0G2K7L8;P49744;A0A0G2JXN9;CON__ENSEMBL:ENSBTAP00000006074;M0RBU0;P35444	Thrombospondin-4	Thbs4	6	6	5	9.9	105.83	0	41.09	94294000	26	+			+	Signal-peptide	0.8045	Signal-peptide	0.184	0.8045	0.0115	1.13499	0.00109121	2.82219	1.34271	+	+		NA	9702760	NA	2405270	0	3	0	0	0	0	0	10	9	1	6	0	0	0	0	0	37618000
G3V6K1;Q9R0D6	Transcobalamin-2	Tcn2	19	19	19	63.5	47.516	0	239.82	1756800000	114	+			+	Signal-peptide	0.9332	Signal-peptide	0.0036	0.9332	0.0632	2.8743	0	6.52141	3.33226	+	+		11716000	131580000	NA	73091300	1	4	0	0	0	0	0	28	26	38	22	0	0	20771000	7287600	7303900	445900000
G3V6B1;Q07257	Transforming growth factor beta-2;Latency-associated peptide	Tgfb2	4	4	4	15.8	50.576	0	16.958	133100000	20	+			+	Signal-peptide	0.8029	Signal-peptide	0.0224	0.8029	0.1747	1.35272	0.00130903	2.04726	1.27345	+	+		2858170	6946250	1110470	2010310	3	4	1	1	1	0	0	5	2	5	5	10511000	8089800	15884000	2092900	0	30805000
Q9ERB4;D3ZFC3;D3Z9N6;D4A8Y6;A0A0G2K944	Versican core protein	Vcan	12	12	12	7.5	300	0	31.84	1285700000	43	+			+	Signal-peptide	0.655	Signal-peptide	0.2542	0.655	0.0908	2.00902	0.000218466	4.56955	2.25465	+	+		5253560	98414000	663563	114881000	3	4	0	0	0	0	0	16	13	9	5	18596000	26946000	12613000	12320000	3244500	501780000
P53813;M0R5R0;CON__P07224	Vitamin K-dependent protein S	Pros1	9	9	9	16.9	74.626	0	21.262	411880000	24	+			+	Signal-peptide	0.9055	Signal-peptide	0.0313	0.9055	0.0632	5.16058	0	5.83109	4.84393	+	+		NA	31654000	NA	16520900	0	4	0	0	0	0	0	4	4	12	4	0	0	0	3119700	0	78470000
Q642A6	von Willebrand factor A domain-containing protein 1	Vwa1	4	4	4	21.7	44.832	0	35.934	61187000	12	+			+	Signal-peptide	0.9413	Signal-peptide	0.01	0.9413	0.0488	1.05145	0.00610035	1.59463	1.00541	+	+		1747900	4181500	NA	2110030	1	3	0	0	3	0	0	2	1	6	0	0	3474400	18806000	0	0	5801200
F1M6Q3	Collagen type IV alpha 2 chain	Col4a2	50	50	49	53.4	160.76	0	323.31	9525300000	362					Intracellular	0.5224	Intracellular	0.9041	0.0001	0.0958	7.13067	0	10.4637	9.20351	+	+		636770	718130000	399713	151880000	2	4	0	0	1	0	0	109	84	92	76	18004000	5893400	5393000	5647500	0	2475600000
D4ADG9	Collagen type VIII alpha 2 chain	Col8a2	37	37	37	68.5	66.93	0	323.31	4757900000	229	+			+	Signal-peptide	0.933	Signal-peptide	0.0093	0.933	0.0577	5.66389	0	8.78903	6.76226	+	+		NA	387768000	NA	181755000	0	4	0	0	0	0	0	53	47	53	76	2723800	0	0	0	0	878160000
F1M9B2	Insulin-like growth factor binding protein 7, isoform CRA_b (Insulin-like growth factor-binding protein 7)	Igfbp7	14	14	14	51.2	28.949	0	114.57	5215300000	103	+			+	Signal-peptide	0.996	Signal-peptide	0.0003	0.996	0.0037	4.06328	0	8.29903	4.90922	+	+		4193900	414763000	NA	252767000	1	4	0	0	0	0	0	25	17	36	25	0	0	21240000	4886400	0	1072100000
F1LTF8	Laminin subunit alpha 4	Lama4	48	48	48	35.9	196.95	0	323.31	2683400000	233	+			+	Signal-peptide	0.9946	Signal-peptide	0.0001	0.9946	0.0053	6.19296	0	7.74545	6.68604	+	+		NA	214770000	NA	50291900	0	4	0	0	0	0	0	64	62	62	45	0	0	1101300	0	0	757730000
F1MA59	Collagen type IV alpha 1 chain	Col4a1	18	18	16	17.9	160.61	0	290.3	6287800000	189	+			+	Signal-peptide	0.9989	Signal-peptide	0.0003	0.9989	0.0008	3.72423	0	7.60747	4.37683	+	+		3598840	453722000	4883570	285846000	4	4	1	1	5	1	0	42	42	68	29	28380000	29710000	139100000	21210000	0	1053200000
B1H219	Dickkopf WNT-signaling pathway inhibitor 3 (Dkk3 protein) (RCG39957, isoform CRA_a)	Dkk3	11	11	11	52	38.738	0	323.31	1250900000	53	+			+	Signal-peptide	0.9753	Signal-peptide	0.0035	0.9753	0.0212	3.94469	0	7.40283	4.5313	+	+		NA	98577800	NA	58186100	0	4	0	0	0	0	0	17	15	4	17	0	0	0	0	0	435440000
D3ZQN7	Laminin subunit beta 1	Lamb1	42	42	42	35.6	197.39	0	323.31	2139200000	154	+			+	Signal-peptide	0.9326	Signal-peptide	0.0052	0.9326	0.0622	4.17633	0	6.79481	4.54076	+	+		2076720	165278000	2114980	34377400	4	4	3	1	1	3	0	39	38	42	27	31883000	17754000	6493300	24616000	3085600	537080000
D4A0J7	Olfactomedin-like 2B (Olfactomedin-like 2B (Predicted), isoform CRA_a)	Olfml2b	13	13	13	29.1	83.447	0	107.01	640580000	64	+			+	Signal-peptide	0.934	Signal-peptide	0.0074	0.934	0.0586	5.20128	0	6.59538	5.27854	+	+		NA	51205200	NA	17418400	0	4	0	0	0	0	0	17	20	20	7	0	0	0	0	0	213390000
Q5FWS5	Lysyl oxidase-like 1	Loxl1	15	15	15	42.1	66.589	0	113.73	1496800000	94	+			+	Signal-peptide	0.6888	Signal-peptide	0.2448	0.6888	0.0664	3.59315	0	6.50318	3.94881	+	+		3013200	118694000	1524100	50316800	2	4	2	0	0	0	0	24	21	17	30	16665000	5448200	4756100	0	0	464490000
D3ZP82	Lysyl oxidase-like 3 (Lysyl oxidase-like 3 (Predicted), isoform CRA_a)	Loxl3	10	10	10	17.6	83.628	0	54.31	498780000	42	+			+	Signal-peptide	0.8399	Signal-peptide	0.0864	0.8399	0.0737	5.56668	0	6.22472	5.33114	+	+		NA	40486200	NA	14463000	0	4	1	1	0	0	0	13	10	5	12	3737800	6651600	0	3911700	0	148570000
A0A0G2JU68	Pappalysin 2	Pappa2	10	10	10	10.4	190.94	0	33.077	359180000	29	+			+	Signal-peptide	0.7938	Signal-peptide	0.0182	0.7938	0.188	2.12908	0.000154058	4.52483	2.33015	+	+		NA	33811300	NA	12837700	0	3	0	0	0	0	0	11	9	0	9	0	0	1735600	0	0	108910000
D3ZVB7	Osteoglycin (Osteoglycin (Predicted))	Ogn	16	16	16	61.4	34.069	0	323.31	6636800000	149	+			+	Signal-peptide	0.9975	Signal-peptide	0.002	0.9975	0.0004	3.71114	0	5.90001	3.85239	+	+		6903400	473680000	3949800	321925000	4	4	4	3	0	1	0	60	39	16	26	70829000	78269000	59076000	44485000	0	2820000000
C0M4B0	Matrix metallopeptidase 19 (Matrix metalloproteinase 19) (Matrix metalloproteinase 19 (Predicted))	Mmp19	13	13	13	44.7	58.288	0	116.13	535360000	66	+			+	Signal-peptide	0.9156	Signal-peptide	0.034	0.9156	0.0503	5.33337	0	5.68475	4.86778	+	+		NA	43987000	NA	3342050	0	4	0	0	0	0	0	22	15	12	17	0	0	0	0	0	151810000
D3ZAF5	Periostin (Periostin, osteoblast specific factor (Predicted), isoform CRA_a)	Postn	55	55	3	71.5	90.055	0	323.31	64900000000	950	+			+	Signal-peptide	0.9903	Signal-peptide	0.0004	0.9903	0.0093	1.51226	0.000251121	5.48396	1.99319	+	+		114950000	4664470000	94568500	3355790000	4	4	33	40	1	24	0	328	283	32	209	1480100000	1342200000	19475000	435780000	0	27500000000
D3ZGB8	Cartilage intermediate layer protein	Cilp	29	29	29	32.5	132.03	0	251.45	1891600000	101	+			+	Signal-peptide	0.7033	Signal-peptide	0.1255	0.7033	0.1712	1.26138	0.000372549	5.29347	1.75031	+	+		951399	202817000	NA	173294000	1	3	1	0	0	0	0	54	41	1	4	9257600	3411200	0	0	0	1030000000
F1MAG8	Semaphorin 3D	Sema3d	14	14	14	28.3	89.531	0	227.84	515120000	78		+			Transmembrane	0.8495	Transmembrane	0.0924	0.0581	0.8495	2.14262	8.52e-05	5.21544	2.47513	+	+		NA	42228400	NA	27134500	0	4	0	0	0	0	0	27	21	5	25	0	3109600	0	0	0	170690000
D3ZPK4	Scavenger receptor cysteine-rich family member with 5 domains	Ssc5d	19	19	19	24.4	151.55	0	121.39	741100000	76	+			+	Signal-peptide	0.8966	Signal-peptide	0.0207	0.8966	0.0827	2.43351	9.59e-05	5.14331	2.68202	+	+		NA	60404300	NA	55589400	0	4	1	0	0	0	0	33	29	9	4	1636100	0	0	0	0	382380000
D4A2G6	Thrombospondin 2	Thbs2	30	29	29	41.1	129.73	0	323.31	3519100000	150	+			+	Signal-peptide	0.8789	Signal-peptide	0.1208	0.8789	0.0003	2.44923	9.64e-05	5.11925	2.68842	+	+		6171520	279466000	3144730	191956000	4	4	6	8	0	4	0	37	37	6	52	56073000	53594000	18029000	73576000	0	1025100000
Q9JI04	Alpha 4 type V collagen (Collagen type V alpha 3 chain) (Procollagen, type V, alpha 3, isoform CRA_b)	Col5a3	16	15	15	15.5	171.57	0	56.479	329610000	66	+			+	Signal-peptide	0.6724	Signal-peptide	0.0157	0.6724	0.3119	4.15685	0	4.96189	3.78027	+	+		NA	26369000	NA	11892100	0	4	0	0	0	0	0	21	24	17	4	0	3540300	0	0	0	105350000
F1LNH3	Collagen type VI alpha 2 chain (Procollagen, type VI, alpha 2, isoform CRA_a)	Col6a2	33	33	33	40.1	109.66	0	244.05	7978300000	253	+			+	Signal-peptide	0.9255	Signal-peptide	0.0047	0.9255	0.0698	3.18589	0	4.92099	3.15118	+	+		24786600	556143000	18528400	118330000	4	4	12	12	2	7	0	62	57	44	57	258240000	296530000	33419000	86095000	0	2762500000
Q58NB7	Retinoic acid receptor responder (Tazarotene induced) 1 (Retinoic acid receptor responder 1) (Tazarotene-induced protein 1)	Rarres1	5	5	5	31	31.952	0	30.053	163810000	23	+			+	Signal-peptide	0.9909	Signal-peptide	0.0006	0.9909	0.0085	5.96404	0	4.88141	4.66266	+	+		NA	13616500	NA	2976900	0	4	0	0	0	0	0	7	6	4	6	0	0	0	0	0	47939000
F1LQ00	Collagen type V alpha 2 chain	Col5a2	70	70	69	68.7	145.2	0	323.31	36000000000	635	+			+	Signal-peptide	0.9235	Signal-peptide	0.0007	0.9235	0.0758	6.0342	0	4.77126	4.61058	+	+		90642500	2546620000	11545200	804442000	4	4	20	15	37	27	0	114	117	150	155	298000000	440890000	623770000	467900000	0	7026100000
D3ZK14	Tenascin N	Tnn	58	58	58	52.4	173.25	0	323.31	4670000000	183	+			+	Signal-peptide	0.9903	Signal-peptide	0.0002	0.9903	0.0096	0.876891	0.00109299	4.74952	1.34477	+	+		1125580	350835000	1076660	546742000	4	4	0	0	1	5	0	1	1	117	58	17993000	20070000	38675000	65579000	0	9816200
B1WC91	C1q and TNF-related 3 (C1qtnf3 protein)	C1qtnf3	6	6	6	30.1	35.043	0	101.58	1827800000	74	+			+	Signal-peptide	0.9936	Signal-peptide	0.0002	0.9936	0.0062	2.27194	8.45e-05	4.63659	2.45388	+	+		9762900	124694000	2804210	46156100	3	4	5	3	1	1	0	17	13	11	23	109750000	95290000	14114000	56981000	5316700	504220000
F1M8K0	Dystroglycan 1	Dag1	5	5	5	12.3	96.705	0	26.665	249170000	27	+	+			Signal-peptide	0.8551	Signal-peptide	0.0118	0.8551	0.1331	4.48953	0	4.49825	3.72853	+	+		NA	12095000	NA	950748	0	4	2	2	2	1	0	7	6	4	3	2864600	27557000	39446000	32506000	0	36793000
F1LUN5	Collagen type IV alpha 5 chain	Col4a5	10	8	8	12.1	161.44	0	76.872	361500000	47	+			+	Signal-peptide	0.9717	Signal-peptide	0.0004	0.9717	0.0279	2.34756	8.43e-05	4.4104	2.45184	+	+		2444100	26221900	NA	31260300	1	4	0	0	5	0	0	5	6	25	6	0	0	12908000	0	0	12601000
Q6QI48	LRRGT00160 (Non-specific lipid-transfer protein)	Podn	9	9	9	18.7	72.506	0	22.392	188110000	33					Intracellular	0.6681	Intracellular	0.78	0.0002	0.2198	3.31425	0	4.31443	3.01289	+	+		NA	13759600	NA	6383900	0	4	0	0	0	0	0	11	11	10	1	0	0	0	0	18164000	62306000
D4AC70	Collagen type VIII alpha 1 chain	Col8a1	33	33	33	69	73.506	0	198.25	9878200000	257	+			+	Signal-peptide	0.8926	Signal-peptide	0.0139	0.8926	0.0935	3.55361	0	4.28569	3.13418	+	+		35605000	687110000	17945300	394609000	4	4	8	4	3	8	0	54	58	25	97	226540000	349660000	100680000	379320000	0	1707100000
F1LR02	Collagen type XVIII alpha 1 chain (Procollagen, type XVIII, alpha 1, isoform CRA_a)	Col18a1	14	14	14	17.8	134.64	0	127.65	498860000	72	+			+	Signal-peptide	0.9949	Signal-peptide	0.0046	0.9949	0.0005	1.88045	0.000248337	3.59817	1.96145	+	+		6124600	33899500	162209	20596300	2	4	8	6	0	0	0	25	20	12	1	39580000	33044000	6710300	0	0	195890000
G3V901	Exostosin glycosyltransferase 1 (Similar to Ext1)	Ext1	8	8	8	18.6	86.307	0	16.847	82224000	17		+			Transmembrane	0.9667	Transmembrane	0.0036	0.0296	0.9667	3.90442	0	3.56041	2.94823	+	+		NA	6589870	NA	1171140	0	4	0	0	0	0	0	5	4	4	4	0	0	0	1539600	0	24120000
F1LST1	Fibronectin (Fibronectin 1, isoform CRA_c)	Fn1	153	1	1	72.8	262.75	0	136.32	3018400000	43	+			+	Signal-peptide	0.9652	Signal-peptide	0.001	0.9652	0.0338	0.689212	0.00428035	3.39049	1.0654	+	+		6244070	303063000	3419060	34136000	4	3	2	2	4	0	0	8	11	6	10	39558000	29820000	110520000	51529000	0	902580000
A0A0G2JWB6	Peroxidasin	Pxdn	50	50	50	46.8	165.21	0	215.9	3930000000	241	+			+	Signal-peptide	0.7538	Signal-peptide	0.0004	0.7538	0.2458	3.43944	0	5.99692	3.67233	+	+		6095050	303297000	5489510	139165000	4	4	3	6	10	1	0	69	61	53	38	31294000	53971000	116470000	5485900	0	1126700000
F1LND0	Collagen type XVI alpha 1 chain	Col16a1	9	9	9	11.1	159.38	0	26.761	171420000	21	+			+	Signal-peptide	0.8082	Signal-peptide	0.1055	0.8082	0.0862	1.85919	0.000342508	3.1354	1.83153	+	+		NA	12903700	NA	16974700	0	4	0	0	0	0	0	4	2	13	2	0	1675200	832670	0	0	11323000
F1MAN8	Laminin subunit alpha 5 (Laminin, alpha 5, isoform CRA_a)	Lama5	18	18	18	9.6	403.77	0	115.97	214670000	35	+			+	Signal-peptide	0.7489	Signal-peptide	0.0446	0.7489	0.2066	1.32712	0.000853616	3.06865	1.51032	+	+		2434800	17663000	NA	23603700	1	3	0	0	1	0	0	3	3	28	0	0	16896000	25386000	0	0	26006000
G3V9M6	Fibrillin 1 (Fibrillin 1, isoform CRA_a)	Fbn1	98	98	97	50.4	311.95	0	323.31	25800000000	886	+			+	Signal-peptide	0.9472	Signal-peptide	0.0018	0.9472	0.051	2.8405	0.000216495	2.99832	2.23744	+	+		218497000	1488650000	141422000	338565000	4	4	90	78	44	37	0	179	162	171	125	3325700000	2085200000	1122800000	399610000	0	6097900000
D3ZSC1	Sushi domain containing 5 (Predicted) (Sushi domain-containing 5)	Susd5	6	6	6	19.2	67.554	0	8.1301	132640000	8	+	+			Signal-peptide	0.8987	Signal-peptide	0.0711	0.8987	0.0302	1.33746	0.000844677	2.94039	1.49105	+	+		NA	8464200	NA	1902600	0	3	0	0	1	0	0	3	2	1	1	8589400	8210500	11979000	2779600	0	45226000
A0A0G2K1L0	Tenascin C	Tnc	70	70	70	49.8	221.74	0	323.31	6257600000	285	+			+	Signal-peptide	0.826	Signal-peptide	0.0033	0.826	0.1707	1.43472	0.000827216	2.89358	1.53793	+	+		22846500	413799000	7207160	670296000	4	4	11	14	10	3	0	24	31	167	25	217920000	163970000	194200000	70376000	0	224320000
F1LTJ5	Uncharacterized protein	Hspg2	99	99	99	59	263.11	0	323.31	30800000000	1166	+			+	Signal-peptide	0.8983	Signal-peptide	0.0215	0.8983	0.0802	3.47258	0.000161151	2.86531	2.40281	+	+		264008000	1711050000	165734000	160872000	4	4	67	55	137	91	0	204	192	200	220	1097100000	983110000	4478100000	1406300000	1634500	5724900000
Q5BK77	Retinoic acid receptor responder (Tazarotene induced) 2 (Retinoic acid receptor responder (Tazarotene induced) 2, isoform CRA_a) (Retinoic acid receptor responder 2)	Rarres2	3	3	3	31.3	18.504	0	33.542	95723000	11	+			+	Signal-peptide	0.8322	Signal-peptide	0.049	0.8322	0.1188	1.8308	0.000366795	2.79174	1.71831	+	+		NA	7863130	NA	1965790	0	3	0	0	0	0	0	2	7	0	2	0	0	0	0	1665000	45163000
G3V722	Beta-1,4-galactosyltransferase 1 (UDP-Gal:betaGlcNAc beta 1,4-galactosyltransferase, polypeptide 1 (Mapped), isoform CRA_a)	B4galt1	4	4	4	16	44.484	0	13.802	49890000	11					Transmembrane	0.9291	Transmembrane	0.0203	0.0506	0.9291	3.08374	0.000211587	2.7386	2.20313	+	+		NA	4050570	NA	2151490	0	4	0	0	0	0	0	6	2	2	1	0	0	0	0	0	26544000
F1LRT0	Latent-transforming growth factor beta-binding protein 3	Ltbp3	5	5	5	6.2	134.37	0	8.2382	78079000	9	+			+	Signal-peptide	0.9837	Signal-peptide	0.0003	0.9837	0.0159	2.86329	0.000196491	2.64491	2.08002	+	+		NA	5055880	NA	800546	0	4	0	0	0	0	0	3	2	1	3	10739000	0	0	4517400	0	8098100
A0A0G2KAJ7	Collagen alpha-1(XII) chain	Col12a1	170	170	166	64	342.52	0	323.31	71900000000	1979	+			+	Signal-peptide	0.975	Signal-peptide	0.0183	0.975	0.0066	2.84639	0.000194896	2.61965	2.06171	+	+		619095000	3923330000	248889000	2014790000	4	4	109	101	182	179	0	271	242	543	352	2728700000	2906100000	8001700000	6194200000	6441500	7680000000
A0A0G2JZH3	Thrombospondin 3	Thbs3	5	4	4	11	104.13	0	14.689	59305000	15	+			+	Signal-peptide	0.9234	Signal-peptide	0.0257	0.9234	0.0509	2.49228	0.000290456	2.44299	1.85594	+	+		NA	4796150	NA	2188330	0	4	0	0	0	0	0	5	4	5	1	0	0	0	0	0	20488000
D4A6W5	Uncharacterized protein	Ndnf	3	3	3	11.5	56.424	0	7.5231	55400000	8					Intracellular	0.5663	Intracellular	0.9275	0	0.0724	1.26758	0.00108502	2.38054	1.32553	+	+		NA	6355800	NA	5630460	0	3	0	0	0	0	0	5	2	0	1	0	0	0	0	0	10474000
D4A8G5	Transforming growth factor, beta-induced	Tgfbi	7	7	7	22.6	74.752	0	35.312	33302000	18	+			+	Signal-peptide	0.8945	Signal-peptide	0.001	0.8945	0.1045	3.53599	0.000201198	2.35246	2.11218	+	+		NA	3504600	NA	979927	0	3	0	0	0	0	0	5	1	12	0	0	0	0	0	0	6932100
G3V6B5	Serine (Or cysteine) proteinase inhibitor, clade B, member 7 (Serpin family B member 7)	Serpinb7	5	5	5	15.5	42.88	0	9.8292	38310000	9					Transmembrane	0.5623	Transmembrane	0.3733	0.0643	0.5623	1.11527	0.00350733	1.77893	1.08919	+	+		NA	3848230	NA	399930	0	3	0	0	0	0	0	4	4	1	0	0	0	3128700	0	0	14314000
A0A0G2K2R5	EGF-containing fibulin extracellular matrix protein 2	Efemp2	13	13	13	44.7	49.387	0	49.752	1107600000	80	+			+	Signal-peptide	0.9999	Signal-peptide	0	0.9999	0.0001	5.01568	0	6.26765	4.97621	+	+		2333800	87671000	NA	25254700	1	4	2	1	2	1	0	22	19	18	15	4765000	4761000	17253000	2691300	0	316480000
D3ZUL3	Collagen type VI alpha 1 chain	Col6a1	43	43	43	53.3	108.8	0	323.31	12400000000	435	+			+	Signal-peptide	0.8678	Signal-peptide	0.0998	0.8678	0.0324	4.27752	0	3.63691	3.14117	+	+		68531700	825140000	26373100	219709000	4	4	28	31	15	19	0	93	96	69	84	588470000	654870000	178800000	295360000	0	3423700000
D4A1T6	Complement C1r	C1r	12	12	12	37.3	75.308	0	139.25	570390000	70	+			+	Intracellular	0.5457	Intracellular	0.8722	0	0.1278	5.6377	0	6.43888	5.50398	+	+		NA	47308500	NA	9228940	0	4	0	0	0	0	0	18	20	17	15	0	0	0	0	0	146360000
D4AC02	Signal peptide, CUB domain and EGF-like domain-containing 2	Scube2	2	2	1	3.7	107.06	0	16.073	33248000	11	+			+	Signal-peptide	0.9991	Signal-peptide	0.0003	0.9991	0.0006	2.27098	0.000851363	1.87072	1.5089	+	+		NA	3655770	NA	1279770	0	3	0	0	0	0	0	2	4	2	3	0	0	0	0	0	10698000
E9PTT2	Exostoses (Multiple) 2 (Predicted) (Exostosin glycosyltransferase 2)	Ext2	8	8	8	17.3	76.126	0	21.942	166060000	35		+			Transmembrane	0.8952	Transmembrane	0.0043	0.1005	0.8952	6.35251	0	4.63672	4.62882	+	+		NA	12019000	NA	1905630	0	4	1	1	2	0	0	10	5	6	10	1551400	4707500	3653000	9878200	0	43409000
F1LM84	Nidogen-1	Nid1	54	54	53	60.1	137.04	0	323.31	21000000000	681	+			+	Signal-peptide	0.9679	Signal-peptide	0.0038	0.9679	0.0284	6.54209	0	6.25048	5.9378	+	+		21706500	1591200000	7084640	152513000	4	4	7	8	8	11	0	162	141	185	159	143570000	104410000	198960000	98990000	0	4761400000
F1LPD0	Collagen alpha-1(XV) chain-like	Col15a1	17	17	17	20.4	134.49	0	70.74	811790000	60	+			+	Intracellular	0.6004	Intracellular	0.9198	0.0093	0.0709	0.737609	0.0044384	2.77654	1.04989	+	+		10498500	72907700	1438890	53579300	2	3	8	10	0	0	0	18	24	0	0	77321000	82281000	0	0	0	302910000
F1M4Q3	Hemicentin 1	Hmcn1	57	57	57	18.7	611.55	0	201.82	633430000	106	+			+	Signal-peptide	0.8247	Signal-peptide	0.0114	0.8247	0.1639	1.49451	0.000378109	3.90558	1.77107	+	+		NA	48594800	NA	57050000	0	4	0	0	0	0	0	0	0	82	24	2619300	0	937740	0	0	3760100
F1M9R4	ABI family member 3-binding protein	Abi3bp	22	22	22	26.9	115.1	0	150.59	2811900000	88					Intracellular	0.5667	Intracellular	0.8317	0.0005	0.1678	1.69445	0.000219321	6.49424	2.26132	+	+		3397900	312203000	NA	121244000	1	3	0	0	0	0	0	35	34	0	19	10982000	23516000	0	0	1138400	1253600000
F1MAA7	Laminin subunit gamma 1	Lamc1	41	41	41	38.9	177.38	0	323.31	2728900000	205	+			+	Signal-peptide	0.9414	Signal-peptide	0.0003	0.9414	0.0584	4.31667	0	7.22448	4.81742	+	+		2050450	212352000	966261	136347000	2	4	0	0	6	0	0	51	49	64	35	6153800	1334700	44140000	0	0	595310000
G3V6A9	Microfibril-associated protein 4	Mfap4	5	5	5	44.5	28.805	0	266.86	1547600000	73	+			+	Signal-peptide	0.9772	Signal-peptide	0.0039	0.9772	0.0189	3.90156	0	7.25644	4.44693	+	+		1988100	126326000	NA	80637500	1	4	2	3	0	0	0	17	27	8	16	14144000	11325000	0	2601100	0	560580000
G3V7L3	Complement C1s subcomponent (RCG29725, isoform CRA_b)	C1s	7	7	1	20.3	77.712	0	23.757	226260000	19	+			+	Signal-peptide	0.8598	Signal-peptide	0.0881	0.8598	0.0521	4.69766	0	5.15001	4.19293	+	+		NA	18650700	NA	1427560	0	4	0	0	0	0	0	5	4	3	7	0	0	0	0	0	65876000
M0R979	Thrombospondin 1	Thbs1	53	53	30	56.4	127.04	0	323.31	17300000000	452					Intracellular	0.5474	Intracellular	0.9358	0.0003	0.0639	1.4053	0.000578755	3.17601	1.58014	+	+		102234000	1171200000	55687400	770777000	4	4	31	33	10	44	0	108	90	22	114	940610000	940960000	141770000	1091700000	0	4528500000
Q5U2V1	Peptidylprolyl isomerase (EC 5.2.1.8)	Fkbp10	15	15	15	36.1	64.786	0	323.31	1621100000	125	+			+	Signal-peptide	0.8235	Signal-peptide	0.089	0.8235	0.0875	2.97059	0.00184592	1.20833	1.20181	+	+		24758700	58150000	3296950	14022500	4	4	11	20	21	19	0	17	11	13	13	156840000	192290000	359680000	230750000	0	204690000
Q6MG73	Complement C2 (Complement component 2)	C2;Cfb	23	23	23	43.9	83.698	0	133.34	645390000	52	+			+	Signal-peptide	0.9679	Signal-peptide	0.0011	0.9679	0.0309	1.31048	0.000647964	3.37819	1.55562	+	+		2412130	43847900	41333	70679300	3	4	0	0	0	0	0	7	3	14	28	29946000	33373000	47202000	29787000	0	31512000
Q80ZA3	Alpha-2 antiplasmin (Serine (Or cysteine) peptidase inhibitor, clade F, member 1) (Serine (Or cysteine) peptidase inhibitor, clade F, member 1, isoform CRA_c) (Serpin family F member 1)	Serpinf1	29	29	29	61	46.465	0	323.31	27100000000	430	+			+	Signal-peptide	0.9364	Signal-peptide	0.0008	0.9364	0.0628	3.863	0	9.8258	5.05372	+	+		3930630	2103510000	3829830	1198280000	4	4	0	0	0	0	0	126	100	125	79	26262000	32061000	28622000	27030000	0	8754700000
P62332	ADP-ribosylation factor 6	Arf6	3	3	3	22.3	20.082	0	6.5548	23027000	10					UPS	0.57	Intracellular	0.8801	0.0014	0.1185	1.29064	0.0121227	1.16437	0.910162	+			704570	NA	82744.5	NA	3	0	4	4	1	1	0	0	0	0	0	5402100	6870200	6039200	4716000	0	0
A0A0H2UI21;Q704S8	Carnitine O-acetyltransferase	Crat	2	2	2	5.1	71.013	0	7.0799	25990000	5					Intracellular	0.5179	Intracellular	0.9424	0	0.0575	2.53747	0.00110288	1.51692	1.36186	+			798383	NA	360705	NA	3	0	2	2	1	0	0	0	0	0	0	11176000	5143400	3979400	5691300	0	0
D4AAH6	Down syndrome critical region homolog 2 (Human) (Predicted), isoform CRA_b (Proteasome assembly chaperone 1)	Psmg1	2	2	2	10.4	33.238	0	4.8001	22259000	5					UPS	0.5719	Intracellular	0.9864	0.0001	0.0135	1.45829	0.00715627	1.22825	0.980899	+			752873	NA	312805	NA	3	0	1	1	1	2	0	0	0	0	0	4785700	3391900	5616600	8465000	0	0
A0A0G2K3W1	von Willebrand factor A domain-containing 8	Vwa8	3	3	3	8.1	53.76	0	6.4198	18860000	9					Intracellular	0.8602	Intracellular	0.8341	0.1265	0.0394	1.098	0.0290071	0.944071	0.756314	+			556262	NA	160534	NA	4	0	2	4	1	2	0	0	0	0	0	2568300	7449900	4238900	4602600	0	0
M0RAP5	SET-binding factor 1	Sbf1	4	4	4	3.4	211.4	0	4.8989	24428000	4					Intracellular	0.8794	Intracellular	0.5317	0.1572	0.3111	1.22134	0.0392056	0.817395	0.708633	+			891346	NA	39911.7	NA	3	0	0	0	3	1	0	0	0	0	0	5352800	1546700	10296000	7232100	0	0
A0A0H2UHR5;Q00972	[3-methyl-2-oxobutanoate dehydrogenase [lipoamide]] kinase, mitochondrial	Bckdk	4	4	4	21.8	46.213	0	19.738	49333000	11					Intracellular	0.9347	Intracellular	0.8309	0.1071	0.062	1.03324	0.0193488	-1.12308	-0.824586	+		+	1952700	NA	451789	NA	3	0	5	3	0	3	0	0	0	0	0	18332000	20724000	0	10278000	0	0
F1MA54;Q63065	[Pyruvate dehydrogenase (acetyl-transferring)] kinase isozyme 1, mitochondrial	Pdk1	3	3	3	11.5	49.098	0	5.493	38532000	9					Intracellular	0.5666	Intracellular	0.8801	0.032	0.0879	1.3913	0.0144027	-1.05975	-0.877667	+		+	1121110	NA	250045	NA	4	0	2	1	2	4	0	0	0	0	0	5971000	13328000	12601000	6632100	0	0
P26772;A0A0G2JTG1	10 kDa heat shock protein, mitochondrial	Hspe1	6	6	6	54.9	10.902	0	10.473	2503900000	44					UPS	0.614	Intracellular	0.992	0.002	0.0059	3.78913	0	-5.14841	-3.63056	+		+	73360300	2989930	21544500	1149170	4	3	11	10	7	14	0	1	0	0	1	698400000	814720000	403140000	554630000	0	13663000
D3ZTP0;A0A0G2K0D8;M0R8T2;P28037	10-formyltetrahydrofolate dehydrogenase	Aldh1l2	33	33	33	54.7	101.8	0	204.29	3503600000	197		+			Intracellular	0.5608	Intracellular	0.9115	0.0018	0.0867	4.067	0	-6.54979	-4.36146	+		+	101272000	NA	10406000	NA	4	0	47	49	45	56	0	0	0	0	0	701830000	907460000	930150000	964200000	0	0
P35213	14-3-3 protein beta/alpha;14-3-3 protein beta/alpha, N-terminally processed	Ywhab	21	17	16	78	28.054	0	323.31	2266400000	105					UPS	0.5838	Intracellular	0.978	0	0.022	1.21998	0.000780576	-3.70115	-1.54077	+		+	60264300	14557800	5308280	5246040	4	3	20	26	25	23	0	5	3	0	3	558160000	524140000	562360000	517800000	0	36694000
P62260	14-3-3 protein epsilon	Ywhae	19	17	17	85.1	29.174	0	165.06	4767800000	158					UPS	0.5283	Intracellular	0.9869	0	0.0131	0.877376	0.00700632	-1.81094	-0.983596	+		+	113740000	54220200	9603790	44359900	4	4	23	23	32	29	0	18	11	3	19	889500000	777830000	1448600000	961160000	0	251290000
P68511;A0A0G2K2B8	14-3-3 protein eta	Ywhah	13	10	10	63	28.211	0	44.465	1064600000	42					UPS	0.5382	Intracellular	0.9893	0	0.0107	0.727437	0.0115099	-1.91697	-0.917972	+		+	25227200	16141700	3841920	420105	4	3	6	8	8	10	0	6	1	1	2	214220000	226250000	235470000	278530000	0	48803000
P61983	14-3-3 protein gamma;14-3-3 protein gamma, N-terminally processed	Ywhag	15	12	11	70.9	28.302	0	323.31	3570000000	85					Intracellular	0.6337	Intracellular	0.9864	0	0.0136	0.736682	0.00610467	-2.43062	-1.00585	+		+	84649000	47788300	13479700	6956070	4	3	13	15	25	15	0	6	6	0	5	838580000	955660000	959400000	394760000	0	145050000
P68255	14-3-3 protein theta	Ywhaq	16	13	13	61.2	27.778	0	323.31	2915700000	74					Intracellular	0.5864	Intracellular	0.9951	0	0.0049	1.4535	0.00127504	-1.95686	-1.28521	+		+	71454700	22281600	29688600	13681200	4	4	13	10	23	15	0	3	2	2	6	527140000	500650000	1250800000	447080000	0	49697000
P63102;A0A0G2JV65	14-3-3 protein zeta/delta	Ywhaz	21	21	17	83.7	27.771	0	323.31	14100000000	171					UPS	0.5658	Intracellular	0.9995	0	0.0005	1.23055	0.00358419	-1.63226	-1.08732	+		+	347975000	143815000	25873200	82759600	4	4	31	29	40	27	0	16	13	2	13	2951900000	2835500000	4127700000	2518700000	0	796820000
A0A0G2KAY8;Q923V8	15 kDa selenoprotein	Seleonof	3	3	3	33.5	17.672	0	15.065	169390000	17	+			+	Signal-peptide	0.7898	Signal-peptide	0.0214	0.7898	0.1888	1.26827	0.00427726	-1.53107	-1.06308	+		+	4494520	3557400	966119	NA	4	1	5	2	4	2	0	3	1	0	0	36325000	42839000	52713000	29187000	0	8325100
P13233	2,3-cyclic-nucleotide 3-phosphodiesterase	Cnp	3	3	3	15.2	47.268	0	37.45	49763000	14					Intracellular	0.5626	Intracellular	0.8971	0.0004	0.1024	2.80758	0.000579285	-1.78622	-1.58559	+		+	1486780	NA	549341	NA	4	0	5	4	1	4	0	0	0	0	0	14152000	14885000	7809200	12917000	0	0
G3V734;Q64591	2,4-dienoyl-CoA reductase, mitochondrial	Decr1	2	2	2	9.6	36.132	0	4.7981	76717000	12					UPS	0.6192	Intracellular	0.9048	0.017	0.0782	1.39327	0.00403491	-1.46301	-1.07433	+		+	2291620	NA	616749	NA	4	0	2	4	3	3	0	0	0	0	0	19785000	21151000	13479000	22303000	0	0
P62193	26S protease regulatory subunit 4	Psmc1	11	11	11	33	49.184	0	38.019	679190000	46					Intracellular	0.5851	Intracellular	0.9714	0	0.0286	5.90225	0	-4.56772	-4.40615	+		+	19901700	NA	2027630	NA	4	0	10	11	13	12	0	0	0	0	0	180980000	183140000	137500000	174420000	0	1031100
Q6P6U2;Q63569	26S protease regulatory subunit 6A	Psmc3	11	11	11	42.3	49.548	0	67.233	389330000	40					Intracellular	0.585	Intracellular	0.986	0	0.014	6.02756	0	-3.90033	-3.92989	+		+	11445200	NA	1080170	NA	4	0	13	8	13	6	0	0	0	0	0	84854000	106120000	110930000	87420000	0	0
Q63570	26S protease regulatory subunit 6B	Psmc4	12	12	12	43.8	47.408	0	99.903	884510000	58					Intracellular	0.5658	Intracellular	0.9645	0	0.0355	4.92218	0	-4.79809	-4.11848	+		+	26090800	NA	2432770	NA	4	0	15	13	17	13	0	0	0	0	0	212550000	234760000	224630000	211440000	0	1129200
G3V7L6;Q63347	26S protease regulatory subunit 7	Psmc2	18	18	18	51	48.633	0	69.34	670780000	47					Intracellular	0.6757	Intracellular	0.9893	0	0.0107	3.52135	0	-4.16499	-3.0649	+		+	19495800	NA	2105230	NA	4	0	10	10	10	17	0	0	0	0	0	150300000	115750000	263900000	140070000	0	0
P62198	26S protease regulatory subunit 8	Psmc5	14	14	14	51	45.626	0	282.25	755880000	52					Intracellular	0.5877	Intracellular	0.9597	0	0.0403	4.70579	0	-4.95826	-4.0944	+		+	22209500	NA	735616	NA	4	0	13	15	11	13	0	0	0	0	0	182960000	206930000	204640000	160070000	0	0
G3V8B6;A0A0G2JTW5;O88761	26S proteasome non-ATPase regulatory subunit 1	Psmd1	20	20	20	39.6	105.7	0	111.39	930130000	68					Intracellular	0.5019	Intracellular	0.9968	0.0002	0.003	2.53747	8.81e-05	-4.26985	-2.53637	+		+	26019700	3390350	9659820	800514	4	2	21	18	20	6	0	0	1	0	2	238190000	271010000	245200000	158750000	0	4551400
F1LMZ8;A0A0G2JWX1	26S proteasome non-ATPase regulatory subunit 11	Psmd11	11	11	3	38.6	47.463	0	49.706	637420000	42					Intracellular	0.5817	Intracellular	0.8763	0.0383	0.0854	5.27105	0	-4.88419	-4.34593	+		+	18688000	NA	3646820	NA	4	0	13	10	10	9	0	0	0	0	0	173060000	156870000	173910000	130770000	0	832050
B0BN93	26S proteasome non-ATPase regulatory subunit 13	Psmd13	8	8	8	27.4	42.817	0	171.67	439560000	33					UPS	0.5063	Intracellular	0.9175	0.0013	0.0812	1.49414	0.00109567	-2.09082	-1.34679	+		+	10541100	5452300	1085390	780926	4	2	8	7	10	8	0	0	0	0	0	102140000	104890000	144190000	80055000	0	5973400
Q4FZT9	26S proteasome non-ATPase regulatory subunit 2	Psmd2	19	19	19	34.9	100.19	0	103.45	1034700000	75					Intracellular	0.5203	Intracellular	0.9182	0	0.0818	3.44648	0.000103512	-3.6951	-2.81693	+		+	28704800	3753800	7572240	483095	4	2	16	21	18	18	0	1	1	0	0	249210000	241320000	307110000	199590000	0	12645000
Q5XI78;D3ZQD3	2-oxoglutarate dehydrogenase, mitochondrial	Ogdh	18	18	18	30.1	116.29	0	155.46	707800000	72					Intracellular	0.6258	Intracellular	0.9201	0.0011	0.0788	3.4198	0	-4.97866	-3.32504	+		+	21162800	NA	4986080	NA	4	0	21	22	8	21	0	0	0	0	0	166210000	277130000	68654000	193410000	0	0
A0A0A0MXW1;P35738	2-oxoisovalerate dehydrogenase subunit beta, mitochondrial	Bckdhb	4	4	4	27.6	42.96	0	14.211	123340000	13					Intracellular	0.5684	Intracellular	0.8649	0.0661	0.069	0.641888	0.0322086	-1.31927	-0.739944	+		+	4470300	NA	758885	NA	3	0	1	6	2	4	0	0	0	0	0	28166000	45599000	7581800	36522000	0	0
B0BMW2;O70351	3-hydroxyacyl-CoA dehydrogenase type-2	Hsd17b10	18	18	18	89.3	27.249	0	323.31	1407600000	91					UPS	0.577	Intracellular	0.9453	0.0215	0.0332	5.45502	0	-5.82618	-5.02501	+		+	41998000	NA	10490900	NA	4	0	27	25	13	26	0	0	0	0	0	358830000	416800000	244680000	387320000	0	0
P29266	3-hydroxyisobutyrate dehydrogenase, mitochondrial	Hibadh	10	10	10	52.2	35.302	0	39.731	686440000	55					UPS	0.5972	Intracellular	0.6121	0.0047	0.3832	5.21712	0	-4.13583	-3.8291	+		+	20086000	NA	5237430	NA	4	0	14	16	10	15	0	0	0	0	0	193340000	197510000	130770000	164820000	0	0
Q5XIE6	3-hydroxyisobutyryl-CoA hydrolase, mitochondrial	Hibch	2	2	2	10.6	43.024	0	6.9091	60217000	8					Intracellular	0.5656	Intracellular	0.8445	0.0018	0.1537	2.32036	0.00152648	-1.40297	-1.25047	+		+	1798600	NA	511410	NA	4	0	3	2	2	1	0	0	0	0	0	18761000	16261000	10022000	15172000	0	0
F1LPD6;P21775;P07871	3-ketoacyl-CoA thiolase A, peroxisomal;3-ketoacyl-CoA thiolase B, peroxisomal	Acaa1b;Acaa1a	6	6	6	26.6	44.524	0	21.779	160440000	14					Intracellular	0.5932	Intracellular	0.9579	0.0015	0.0406	1.30321	0.00108414	-2.30946	-1.32544	+		+	6323530	NA	213701	NA	3	0	6	4	0	4	0	0	0	0	0	52312000	58351000	4442500	45335000	0	0
A0A0G2K642;G3V9U2;P13437	3-ketoacyl-CoA thiolase, mitochondrial	Acaa2	8	8	8	32.8	41.753	0	22.64	326750000	32					Intracellular	0.5098	Intracellular	0.9302	0.0359	0.0339	4.13283	0	-3.60101	-3.06305	+		+	9633550	NA	2430220	NA	4	0	9	15	4	4	0	0	0	0	0	97019000	123490000	64737000	41510000	0	0
P97532	3-mercaptopyruvate sulfurtransferase	Mpst	6	6	6	27.9	32.94	0	25.108	103860000	20					UPS	0.5712	Intracellular	0.9141	0.0399	0.046	1.51746	0.00128629	-1.95716	-1.30986	+		+	3082100	NA	863232	NA	4	0	9	2	5	4	0	0	0	0	0	26368000	22455000	25526000	29509000	0	0
F1LT36;P63326;D3ZH53;A0A0H2UI18;D3ZJY5;Q7TP86;D3ZCN9	40S ribosomal protein S10	RGD1564698;Rps10;RGD1561871;LOC100360905	4	4	4	23.6	18.892	0	105.82	1250000000	31					Intracellular	0.9345	Intracellular	0.8281	0.0021	0.1697	3.35733	0	-5.00335	-3.29257	+		+	35687000	2547700	7551290	627910	4	2	8	8	7	7	0	1	0	0	0	255460000	303080000	438110000	242510000	0	4092400
P62282;D3ZYK5	40S ribosomal protein S11	Rps11	7	7	7	45.6	18.431	0	14.765	2700000000	28					Intracellular	0.9344	Intracellular	0.9357	0	0.0643	4.05713	0	-6.43826	-4.31355	+		+	78480000	NA	16773100	NA	4	0	4	8	11	5	0	0	0	0	0	551830000	789260000	846350000	498660000	0	0
Q6PDW1;D3ZHB3;P63324;D3ZG05;D3ZEB8;D3ZV36	40S ribosomal protein S12	LOC100359593;LOC100360573;Rps12	7	7	7	74.2	14.515	0	33.786	2131900000	64					UPS	0.5945	Intracellular	0.835	0.0017	0.1634	2.62037	9.71e-05	-4.68035	-2.70264	+		+	51002000	10182000	25983300	NA	4	1	12	15	21	13	0	1	1	0	1	387770000	504030000	829110000	396690000	725400	2194600
P62278;M0RCY2;F1LMB4	40S ribosomal protein S13	Rps13;LOC683961	11	11	11	45	17.222	0	21.218	1905400000	34					Intracellular	0.9345	Intracellular	0.9554	0	0.0446	6.66715	0	-6.107	-5.89935	+		+	55212000	NA	8951360	NA	4	0	5	10	8	11	0	0	0	0	0	372000000	407370000	773370000	352630000	0	0
Q6PDV6;P13471;F1MA00;D4A290	40S ribosomal protein S14	Rps14	10	10	10	68.9	16.273	0	129.38	1911800000	61					Intracellular	0.9345	Intracellular	0.9068	0	0.0931	5.61864	0	-6.58747	-5.57684	+		+	55888800	NA	7169250	NA	4	0	18	17	16	10	0	0	0	0	0	462510000	491970000	613430000	343930000	0	0
P62845;D3ZAK6	40S ribosomal protein S15	Rps15	3	3	3	46.9	17.04	0	216.59	514380000	32					Intracellular	0.9345	Intracellular	0.9876	0	0.0124	2.71754	8.83e-05	-3.93553	-2.54011	+		+	11640900	NA	3349970	NA	4	0	9	7	10	6	0	0	0	0	0	119680000	143070000	163150000	88479000	0	0
D3ZLL8;P62246;A0A0G2K6I0;D3ZZC7;A0A0G2JYA6;A0A0G2K2F6;D3ZS61	40S ribosomal protein S15a	LOC691716;Rps15a	5	5	5	42.3	14.854	0	14.955	1080000000	16					Intracellular	0.9345	Intracellular	0.9069	0.0002	0.0929	2.84039	9.82e-05	-4.30099	-2.73122	+		+	30699300	4423900	7394530	NA	4	1	2	4	7	3	0	0	0	0	0	264210000	268660000	370560000	163920000	0	0
P62250;A0A1W2Q631;M0R8S7;M0R4I3	40S ribosomal protein S16	Rps16	9	9	9	47.3	16.445	0	14.8	2781100000	46					Intracellular	0.9345	Intracellular	0.9806	0.0145	0.0049	2.7073	9.18e-05	-4.14864	-2.60327	+		+	76661200	7477770	21257300	4171260	4	3	10	11	10	10	0	2	1	0	2	753530000	788210000	803950000	403860000	0	8615200
A0A0H2UHQ8;D3ZFA8;P04644;D3ZHU9;D3ZKG6;M0R8M8;F1M5B1;D3ZM01	40S ribosomal protein S17	LOC100364909;Rps17;LOC100361180;RGD1559955	7	7	7	52.2	15.379	0	34.391	684400000	22					Intracellular	0.9344	Intracellular	0.8441	0.0002	0.1557	4.94805	0	-5.04303	-4.27468	+		+	20091000	NA	4376220	NA	4	0	4	3	7	8	0	0	0	0	0	151850000	185760000	200730000	146050000	0	0
A0A0H2UHT6;D3ZM33;P62271;M0R5K9;A0A0G2KA79;D3ZAU6;D4AA93	40S ribosomal protein S18	LOC100362298;Rps18;LOC100912024;RGD1561919	10	10	10	56.3	17.587	0	94.566	2055500000	35					Intracellular	0.9345	Intracellular	0.6745	0.0001	0.3253	4.90601	0	-6.83441	-5.16482	+		+	60204300	NA	14596100	NA	4	0	9	8	10	8	0	0	0	0	0	505760000	495830000	649280000	404610000	0	0
D4A6G6;A0A0H2UI38;P17074;F1M8C7;D3ZGN8;F1M764;F1LYF3;D3ZSH6;D3ZUD7	40S ribosomal protein S19	LOC100362339;Rps19;Rps19l1	7	7	7	34.5	16.117	0	28.481	1534800000	33					Intracellular	0.9345	Intracellular	0.9338	0.0003	0.0659	4.68271	0	-5.753	-4.49012	+		+	44781500	NA	6961120	NA	4	0	7	8	11	7	0	0	0	0	0	357980000	438250000	492320000	246230000	0	0
A0A0U1RVI9;P27952;E9PT76;D3ZIY7;D3ZT78;A0A0G2KB28;D3ZQW7;M0RAJ8	40S ribosomal protein S2	Rps2;LOC100359960;Gm8225	11	11	8	43.1	28.589	0	32.02	2708400000	45					UPS	0.5514	Intracellular	0.8639	0.0002	0.1359	3.3288	0	-6.17327	-3.63414	+		+	77896000	4806600	24989900	NA	4	1	13	9	13	10	0	0	0	0	0	834980000	521760000	975760000	370500000	0	0
A0A0H2UHG7;D3ZZK1;A0A0G2K6L6;P60868;A0A0G2JY70;M0RB28;M0R5V6;M0R566;A0A0G2K8W1;M0R987;A0A0G2K3E9	40S ribosomal protein S20	LOC100359563;Rps20;LOC100909911;RGD1562725;RGD1563124;LOC100364116	5	5	5	29.7	13.241	0	29.796	2163700000	21					Intracellular	0.9345	Intracellular	0.9639	0	0.0361	2.60509	9.02e-05	-4.27978	-2.58118	+		+	59546800	7519400	25289000	2733670	4	2	3	6	7	2	0	1	1	0	1	546970000	508600000	801500000	282420000	0	10329000
A0A0G2JXC3;P05765;D3ZSE0;D3ZRI8	40S ribosomal protein S21	Rps21;LOC100363012	3	3	3	48.1	8.866	0	9.2339	504750000	17					Intracellular	0.9344	Intracellular	0.95	0.0008	0.0492	2.95134	0.000154483	-3.11328	-2.33416	+		+	13215400	NA	4483370	NA	4	0	5	4	5	3	0	0	0	0	0	116120000	146310000	185520000	50790000	0	0
P62268;D4A9Q3;F1LTW8	40S ribosomal protein S23	Rps23;RGD1563570;RGD1563705	7	7	7	49	15.807	0	63.619	860120000	29					Intracellular	0.9345	Intracellular	0.9008	0.0001	0.0991	4.99705	0	-4.45033	-3.94291	+		+	24998000	NA	5021160	NA	4	0	6	8	7	8	0	0	0	0	0	246930000	232840000	224110000	150180000	0	0
A0A0H2UHH9;D4ACJ1;P62850;D3ZFZ8	40S ribosomal protein S24	LOC100363469;Rps24	3	3	3	26.7	15.197	0	6.9312	316030000	18					Intracellular	0.9345	Intracellular	0.9515	0.0032	0.0453	4.22781	0.000108317	-3.21575	-2.86406	+		+	9115500	NA	3478710	NA	4	0	4	7	3	4	0	0	0	0	0	77685000	49047000	142220000	47073000	0	0
F1M6F4;A0A0H2UHU0;P62853;D4AE10;M0R763;D3ZCH5	40S ribosomal protein S25	LOC100912210;Rps25;RGD1563613;LOC100911337	4	4	4	24.2	13.644	0	8.8465	1055700000	15					UPS	0.595	Intracellular	0.9519	0	0.0481	5.12736	0	-5.51192	-4.64468	+		+	30762500	NA	10542300	NA	4	0	3	3	6	3	0	0	0	0	0	329550000	251040000	351680000	123390000	0	0
D3Z8D7;A0A0G2K743;P62856;D3ZJ54;A0A0G2JY64;A0A0G2JVP7	40S ribosomal protein S26	LOC100361854;Rps26;RGD1565117	3	3	3	31.3	13.006	0	6.013	653500000	11					Intracellular	0.9328	Intracellular	0.8217	0.0005	0.1778	4.17393	0	-4.6884	-3.66	+		+	18946300	NA	8281220	NA	4	0	3	3	4	1	0	0	0	0	0	226120000	109850000	233640000	80683000	0	1402600
Q71TY3;M0RA26;P24051	40S ribosomal protein S27;40S ribosomal protein S27-like	Rps27;LOC100362987;Rps27l	3	3	3	40.5	9.461	0	12.036	564520000	11					UPS	0.5495	Intracellular	0.5589	0.0506	0.3905	4.87086	0	-4.48644	-3.90701	+		+	16422400	NA	5195730	NA	4	0	4	3	2	2	0	0	0	0	0	141550000	149840000	194500000	78637000	0	0
P62859;F1M168	40S ribosomal protein S28	Rps28	4	4	3	40.6	7.8409	0	7.6152	457920000	19					Intracellular	0.9345	Intracellular	0.9669	0.0002	0.0329	3.2742	9.56e-05	-3.54674	-2.66973	+		+	13285800	NA	3194240	NA	4	0	4	5	4	4	0	2	0	0	0	105850000	123880000	143410000	81335000	0	1271700
P62909;D3ZVH2;A0A0G2K689	40S ribosomal protein S3	Rps3;RGD1560831	12	12	12	53.9	26.674	0	132.83	4653900000	97					Intracellular	0.8877	Intracellular	0.8763	0	0.1236	1.69705	0.000300429	-3.85133	-1.90015	+		+	123192000	19921700	17440800	3789970	4	3	25	18	25	19	0	5	1	0	4	1026700000	1329100000	1321500000	863440000	0	40363000
P49242;M0R6L4;Q6TXJ6	40S ribosomal protein S3a;40S ribosomal protein S3b;40S ribosomal protein S3a	Rps3a;LOC100365839	13	13	13	42.4	29.945	0	50.09	3123500000	59					UPS	0.5521	Intracellular	0.9058	0	0.0942	6.75151	0	-6.73208	-6.4057	+		+	90779000	NA	13782800	NA	4	0	16	15	17	11	0	0	0	0	0	894580000	858940000	948670000	415150000	0	6151400
X1WI37;A0A0H2UHX3;P62703;D3ZX01	40S ribosomal protein S4, X isoform;40S ribosomal protein S4	LOC100362640;Rps4x;Rps4y2	17	17	17	56.1	29.466	0	110.08	3000000000	60					Intracellular	0.9345	Intracellular	0.8965	0.0084	0.0951	6.24634	0	-8.02302	-6.89449	+		+	87132000	NA	19003100	NA	4	0	14	10	21	15	0	0	0	0	0	766670000	720730000	1020200000	485750000	0	0
B0BN81;P24050;A0A0G2K200	40S ribosomal protein S5;40S ribosomal protein S5, N-terminally processed	Rps5	8	8	8	54.4	22.906	0	131.66	1471300000	61					Intracellular	0.9345	Intracellular	0.9753	0	0.0247	4.27005	0	-5.18455	-3.95278	+		+	43518000	1668590	9260750	915937	4	3	16	21	13	8	0	1	2	0	0	330560000	236490000	433820000	432730000	0	3540600
M0RD75;P62755;A0A0G2K7G8	40S ribosomal protein S6	Rps6	8	8	8	34	28.421	0	27.857	1348400000	39		+			Intracellular	0.9345	Intracellular	0.9848	0	0.0152	4.30232	0	-5.98295	-4.32675	+		+	36650000	NA	10502600	NA	4	0	8	13	11	7	0	0	0	0	0	392160000	366960000	415090000	173340000	0	0
P62083;Q6AY74	40S ribosomal protein S7	Rps7	11	11	11	57.7	22.127	0	57.262	2564200000	66					Intracellular	0.5967	Intracellular	0.9371	0.0001	0.0628	3.27877	0	-5.45789	-3.38643	+		+	73364000	1649350	40500000	677055	4	2	15	13	22	14	0	1	1	0	0	492090000	548390000	1009800000	506050000	0	3149700
P62243;M0R7Q5;D3ZIE1;Q6TXJ0	40S ribosomal protein S8	Rps8;LOC100363452;RGD1566369;LOC297756	12	12	12	55.8	24.205	0	140.27	2087100000	64					Intracellular	0.9345	Intracellular	0.9272	0.0001	0.0728	6.19805	0	-6.26936	-5.754	+		+	60902300	NA	14066800	NA	4	0	18	13	22	11	0	0	0	0	0	630340000	473800000	639040000	339110000	0	0
P29314;A0A0G2K4C4;D3ZV50;M0RB65	40S ribosomal protein S9	Rps9;LOC100364509	7	7	7	25.3	22.591	0	11.937	1360900000	40					Intracellular	0.9345	Intracellular	0.9987	0	0.0013	3.00326	0	-5.03899	-3.06429	+		+	38882200	4614200	12829700	NA	4	1	9	11	13	6	0	0	0	0	1	376690000	352710000	449070000	173820000	0	1271400
P38983	40S ribosomal protein SA	Rpsa	12	12	12	59.3	32.824	0	306.84	5285500000	123					Intracellular	0.6047	Intracellular	0.7883	0.0808	0.1309	1.39513	0.000364683	-3.94631	-1.70578	+		+	142472000	27146300	19105300	10869700	4	3	24	22	31	32	0	6	1	0	7	1272300000	1149900000	1431100000	1260000000	0	34756000
A0A0G2JSR9;Q91ZS3	45 kDa calcium-binding protein	Sdf4	4	4	4	23.3	44.321	0	19.926	103510000	20	+			+	Signal-peptide	0.5433	Signal-peptide	0.0169	0.5433	0.4398	0.45739	0.154381	-0.747532	-0.486754				2583720	3186650	826416	212908	4	2	4	2	4	3	0	2	3	2	0	11171000	12143000	11691000	34346000	0	12848000
Q794F9;A0A0H2UHQ0	4F2 cell-surface antigen heavy chain	Slc3a2	15	15	15	50.7	58.071	0	137.95	1150900000	85		+			Intracellular	0.579	Intracellular	0.9654	0	0.0346	2.03996	0.00131215	-1.54811	-1.28054	+		+	28938500	10438600	8007790	4510180	4	4	12	17	16	18	0	6	3	3	10	178050000	193090000	373390000	303150000	0	30146000
A0A0G2JSI1;Q9JLJ3	4-trimethylaminobutyraldehyde dehydrogenase	Aldh9a1	21	21	21	62.6	54.05	0	182.34	1901800000	104					Intracellular	0.5278	Intracellular	0.8996	0	0.1003	2.6819	9.67e-05	-4.53223	-2.70238	+		+	54971500	4412700	6927610	1386900	4	3	22	24	25	29	0	2	2	0	0	451300000	425040000	536640000	437390000	0	22337000
A0A0G2K913;A0A0G2JVD6;P80385	5-AMP-activated protein kinase subunit gamma-1	Prkag1	2	2	2	14.6	37.296	0	19.108	28014000	8					UPS	0.6163	Intracellular	0.7171	0.0065	0.2764	0.0707141	0.836941	0.0734634	0.0627131				834048	NA	282056	NA	4	0	2	3	2	1	0	0	0	0	0	7983600	11754000	3381600	4895400	0	0
Q6Q0N3	5-nucleotidase domain-containing protein 2	Nt5dc2	6	6	6	20.4	63.652	0	24.278	102250000	25					Intracellular	0.7582	Intracellular	0.8619	0.0391	0.0989	1.68436	0.0166008	-0.935729	-0.850449	+		+	3041170	NA	773005	NA	4	0	4	8	6	7	0	0	0	0	0	24625000	23991000	23145000	30493000	0	0
P63039	60 kDa heat shock protein, mitochondrial	Hspd1	34	34	34	70.7	60.955	0	323.31	13500000000	365					Intracellular	0.6827	Intracellular	0.9067	0.0042	0.0891	3.95117	0	-8.03842	-4.72046	+		+	375132000	3803500	107722000	1308150	4	2	84	109	61	106	0	3	0	0	2	3610600000	3953100000	2343700000	3583200000	0	24031000
P19945;D3ZJT4	60S acidic ribosomal protein P0	Rplp0	16	16	16	59	34.215	0	211.5	4660000000	141					Intracellular	0.573	Intracellular	0.9929	0.0008	0.0063	1.48811	0.000647378	-2.84008	-1.55538	+		+	129930000	28674300	8177450	19646200	4	4	28	29	28	28	0	10	7	1	10	965040000	1058600000	1181600000	1060000000	0	99568000
P19944;A0A0H2UHJ3	60S acidic ribosomal protein P1	Rplp1	4	4	4	79.8	11.498	0	62.241	1295500000	34					Intracellular	0.5701	Intracellular	0.885	0.0578	0.0572	2.52628	8.38e-05	-3.97864	-2.4446	+		+	35837000	5762100	6641250	1160220	4	2	8	11	7	6	0	2	0	0	0	209160000	331360000	414020000	319650000	0	13193000
P02401;D4A4D5;D3ZN03	60S acidic ribosomal protein P2	Rplp2;LOC498555;LOC100362751	4	4	4	56.5	11.692	0	19.403	377350000	17					Intracellular	0.595	Intracellular	0.9189	0.0675	0.0136	5.78662	0	-4.26368	-4.13511	+		+	10981800	NA	1962810	NA	4	0	3	4	3	7	0	0	0	0	0	57645000	119020000	128570000	72113000	0	0
Q6PDV7;D4A1P2	60S ribosomal protein L10	Rpl10;Rpl10l	6	6	6	29	24.604	0	56.71	884840000	54					Intracellular	0.9345	Intracellular	0.8817	0	0.1183	3.52631	0	-5.8376	-3.69057	+		+	24387300	NA	6117590	NA	4	0	16	11	14	13	0	0	0	0	0	244360000	202820000	306770000	130890000	0	0
P62907;F1LYQ7;D3Z9F6	60S ribosomal protein L10a;Ribosomal protein	Rpl10a;LOC680700	13	13	13	58.1	24.831	0	90.175	2720000000	39					UPS	0.5521	Intracellular	0.9863	0.0001	0.0137	1.03079	0.00128732	-3.05379	-1.30994	+		+	69169000	23795000	25122500	12662100	4	3	6	7	14	8	0	0	1	0	3	725300000	747860000	768600000	338870000	0	22609000
P62914;Q4V8I6;A0A0G2K3Y8	60S ribosomal protein L11	Rpl11	9	9	9	47.2	20.252	0	39.505	1660000000	45					Intracellular	0.9345	Intracellular	0.9604	0.0002	0.0394	3.59608	0	-5.05497	-3.46831	+		+	47462200	4819600	15187300	NA	4	1	14	12	11	8	0	0	0	0	0	407690000	501330000	447470000	299920000	0	7627300
P23358;A0A140TAC5;M0R4B6;D3ZJE2;D4A8N3	60S ribosomal protein L12	Rpl12;Rpl12-ps1	7	7	7	58.8	17.845	0	118.28	3332900000	46					Intracellular	0.5505	Intracellular	0.9765	0.0002	0.0234	0.974827	0.00162654	-2.74348	-1.22319	+		+	80041000	33139000	7523490	10592800	4	3	8	8	8	7	0	4	4	0	7	765840000	842830000	866730000	608580000	0	81465000
D3ZRM9;P41123;F1M2E9;D3ZD02;A0A0G2JYG9	60S ribosomal protein L13	LOC100360491;Rpl13;RGD1563145	6	6	6	25.6	24.202	0	70.729	1145500000	34					Intracellular	0.9345	Intracellular	0.891	0	0.1089	4.09308	0	-5.49603	-3.97505	+		+	33389000	NA	11063400	NA	4	0	9	9	8	8	0	0	0	0	0	326010000	289910000	379000000	150610000	0	0
P35427;Q5RK10;A0A1W2Q6L2	60S ribosomal protein L13a	Rpl13a	4	4	4	17.2	23.476	0	8.5513	1047200000	20	+	+			Intracellular	0.9345	Intracellular	0.9724	0.0015	0.0261	4.40706	0	-4.95362	-3.92328	+		+	28243500	NA	13123500	NA	4	0	3	5	8	2	0	1	0	0	1	341340000	281800000	311150000	110370000	0	0
F1LSW7;B5DEM5;Q63507;D3ZHE6	60S ribosomal protein L14	Rpl14	5	5	1	23.8	23.322	0	11.075	809300000	24					Intracellular	0.9237	Intracellular	0.9077	0.0111	0.0813	4.05848	0	-4.58748	-3.54737	+		+	23173200	NA	5264240	NA	4	0	5	6	8	5	0	0	0	0	0	212930000	207970000	255850000	122300000	0	10260000
P61314;D3ZF52	60S ribosomal protein L15	Rpl15	6	6	6	28.4	24.146	0	9.8179	484980000	20					Intracellular	0.9345	Intracellular	0.9802	0	0.0198	3.8945	0	-4.24432	-3.29547	+		+	13657000	NA	7201880	NA	4	0	7	3	7	3	0	0	0	0	0	170470000	81243000	188440000	43646000	0	1183000
A0A0H2UHQ1;F1LZX7;P24049;A0A0G2KB77;D3Z9G9;Q7TPJ7	60S ribosomal protein L17	Rpl17	7	7	7	38.1	21.967	0	13.22	981000000	24					Intracellular	0.862	Intracellular	0.8942	0.0001	0.1057	3.47673	0	-4.82516	-3.30539	+		+	28710200	NA	4795210	NA	4	0	3	9	10	2	0	0	0	0	0	237180000	226870000	320370000	196580000	0	0
A0A0H2UHS7;P12001	60S ribosomal protein L18	Rpl18	5	5	5	31.7	21.786	0	12.101	372480000	21					Intracellular	0.9345	Intracellular	0.9032	0.0004	0.0964	1.70962	0.00037037	-3.06105	-1.73129	+		+	10687800	NA	8243420	NA	4	0	4	3	8	5	0	0	0	0	1	134240000	50695000	172730000	14822000	0	0
P62718;F1M0K6	60S ribosomal protein L18a	Rpl18a;RGD1565566	9	9	9	42	20.732	0	16.458	968680000	22					Intracellular	0.9345	Intracellular	0.9515	0	0.0485	3.41993	0	-5.33806	-3.4492	+		+	28322500	NA	8580820	NA	4	0	4	3	7	8	0	0	0	0	0	320620000	175450000	325260000	147350000	0	0
P84100;F1M5A9	60S ribosomal protein L19	Rpl19	5	5	5	21.4	23.466	0	129.54	299820000	13					Intracellular	0.9345	Intracellular	0.967	0.0003	0.0328	3.44201	9.79e-05	-3.48531	-2.71526	+		+	8526870	NA	4884400	NA	4	0	4	2	6	1	0	0	0	0	0	68305000	72190000	148980000	10342000	0	0
Q6PDW2;D3ZZH9;D3ZPN7;D3Z9G3;P20280;M0RCS9;D3ZQ96;M0R5R7;F1LWH4;D4A870;D4A7B4;D3ZRA9;D3ZPH0;D3ZMI8;D3ZLH3;D3ZE97	60S ribosomal protein L21	LOC100360604;LOC681195;LOC100361103;Rpl21;RGD1559531;LOC686080;LOC100360611;RGD1560414;RGD1565370;RGD1562839;RGD1562601;RGD1566326	2	2	2	20.6	18.579	0.00044763	4.4714	503060000	4					Intracellular	0.9345	Intracellular	0.9153	0.0009	0.0839	4.82226	0	-3.89209	-3.5126	+		+	14721200	NA	4395440	NA	4	0	1	0	2	1	0	0	0	0	0	131570000	134040000	153770000	83676000	0	0
Q6PDV8;P47198	60S ribosomal protein L22	Rpl22	4	4	4	39.8	14.759	0	27.463	1515400000	41					Intracellular	0.557	Intracellular	0.988	0.0001	0.012	5.43867	0	-6.02578	-5.1321	+		+	42179000	NA	7361140	NA	4	0	7	10	14	10	0	0	0	0	0	382100000	387160000	476920000	269220000	0	0
P62832	60S ribosomal protein L23	Rpl23	7	7	7	46.4	14.865	0	68.727	852880000	24					Intracellular	0.9327	Intracellular	0.8986	0.0344	0.0669	5.78264	0	-5.26189	-4.84682	+		+	24926000	NA	6413520	NA	4	0	8	3	8	5	0	0	0	0	0	239710000	231320000	261470000	120380000	0	0
F1LT35;D3ZTH8;P62752;D3ZTX9;D4AAL7;D3ZSR8;D3ZNM1;D3ZFK7;A0A0G2JU90	60S ribosomal protein L23a	RGD1564606;LOC689899;Rpl23a;RGD1565170	5	5	5	39.7	17.734	0	8.7492	865580000	19					UPS	0.5232	Intracellular	0.979	0	0.021	4.67867	0	-5.69023	-4.45673	+		+	25156700	NA	8412250	NA	4	0	6	4	3	6	0	0	0	0	0	287750000	175490000	288250000	110370000	0	3727000
P83732;A0A0H2UH99;M0RBD1	60S ribosomal protein L24	Rpl24	5	5	5	31.8	17.779	0	8.5854	785070000	24					Intracellular	0.9328	Intracellular	0.9982	0	0.0018	4.74597	0	-4.30186	-3.73773	+		+	22601800	NA	5452960	NA	4	0	9	3	7	5	0	0	0	0	0	244940000	186260000	237020000	116850000	0	0
G3V6I9;P12749;D4A1Z2;D4AE42;M0R6L3	60S ribosomal protein L26	Rpl26;Rpl26-ps2	4	4	4	23.4	17.258	0	5.2068	395580000	7					Intracellular	0.9345	Intracellular	0.9133	0	0.0867	3.80949	0	-3.73833	-3.00257	+		+	11636700	NA	1099160	NA	4	0	3	2	2	0	0	0	0	0	0	112790000	105660000	105920000	71204000	0	0
P61354;M0R7P0;D3ZTK5	60S ribosomal protein L27	Rpl27;LOC100912027	5	5	5	38.2	15.798	0	25.583	1710000000	26					Intracellular	0.9345	Intracellular	0.9378	0.024	0.0382	3.58155	0	-4.89544	-3.39819	+		+	49773500	NA	13118900	NA	4	0	7	5	8	6	0	0	0	0	0	474410000	481840000	557880000	195680000	0	0
A0A0G2K7W6;P18445;D4AAY6;D3ZI60;D3ZG03	60S ribosomal protein L27a	Rpl27a;RGD1559972;RGD1561984	3	3	3	22.3	16.587	0	48.707	247830000	14					Intracellular	0.9328	Intracellular	0.9011	0	0.0989	1.05885	0.00198782	-2.29873	-1.19334	+		+	9234370	NA	3723030	NA	3	0	4	0	6	4	0	0	0	0	0	107680000	15428000	63909000	60805000	0	0
Q642E2;D3ZJD3;D3ZEI0;P17702;A0A0G2K8E0;Q6TUD7	60S ribosomal protein L28	LOC100362069;RGD1565183;LOC690096;Rpl28	5	5	5	30.7	15.733	0	9.0839	304270000	13					Intracellular	0.9345	Intracellular	0.9925	0.0001	0.0074	2.65544	0.000212928	-3.12688	-2.21367	+		+	7972230	NA	4183050	NA	4	0	4	3	3	3	0	0	0	0	0	122470000	66515000	96937000	18344000	0	0
P21531;A0A0U1RRY5;D4A9G1	60S ribosomal protein L3	Rpl3	16	16	15	42.9	46.135	0	53.071	2763500000	94					Intracellular	0.9166	Intracellular	0.9908	0.0069	0.0023	6.0208	0	-6.47182	-5.77728	+		+	70072000	NA	15297200	NA	4	0	23	27	22	22	0	0	0	0	0	541500000	616230000	924060000	407320000	0	45126000
P62890;M0RD99;A0A0G2K5E6;M0R764;M0R924	60S ribosomal protein L30	Rpl30;LOC100911427	4	4	4	51.3	12.784	0	28.254	1342500000	45					UPS	0.5767	Intracellular	0.958	0.0003	0.0417	2.43326	8.71e-05	-4.47889	-2.52555	+		+	38167000	4757550	7821870	561373	4	2	8	12	12	7	0	2	2	0	2	289290000	405880000	377820000	237770000	0	9726200
D3ZX87;P62902;D3ZU04;D3ZKU5;D4ABZ9;D3ZZ60;D3Z8W1;D4ACQ2;A0A0G2K7E3;D3ZDE9;D3ZK34;F1LVW2;D3ZVF5;D3ZVY6	60S ribosomal protein L31	LOC100910017;Rpl31;LOC102550734;RGD1564839;Rpl31l4;LOC681356;LOC680384;LOC690384	4	4	4	29.4	16.321	0	6.8938	780070000	11					Intracellular	0.9345	Intracellular	0.8903	0.0001	0.1096	4.8926	0	-4.84672	-4.13172	+		+	22661300	NA	5450360	NA	4	0	4	3	2	2	0	0	0	0	0	204810000	233400000	260480000	81392000	0	0
D4A412;P62912;D4A647	60S ribosomal protein L32	LOC688684;Rpl32	4	4	4	23.6	15.022	0	5.9142	125700000	6					Intracellular	0.9345	Intracellular	0.8894	0.0001	0.1105	0.878684	0.0121797	-1.52047	-0.908799	+		+	4842830	NA	296745	NA	3	0	3	0	3	0	0	0	0	0	0	44386000	38239000	43075000	0	0	0
D3ZZN4;D4A771;P04646	60S ribosomal protein L35a	LOC100362338;LOC100362049;Rpl35a	2	2	2	15.5	12.623	0.00042017	3.5965	232330000	7					Intracellular	0.9345	Intracellular	0.9523	0.0005	0.0471	2.5397	0.00029819	-2.48675	-1.89253	+		+	6844720	NA	2041320	NA	4	0	1	2	2	2	0	0	0	0	0	62370000	67490000	58372000	44096000	0	0
Q6P3V9;P50878	60S ribosomal protein L4	Rpl4	18	18	18	43	47.3	0	82.57	3123700000	79					Intracellular	0.9347	Intracellular	0.977	0.0001	0.0229	3.90568	0	-6.26064	-4.12854	+		+	90885700	3340000	36430100	NA	4	1	25	16	22	16	0	0	0	0	0	784410000	766450000	1014800000	548720000	0	0
P09895;D3ZHP8	60S ribosomal protein L5	Rpl5;Rpl5l1	12	12	12	51.9	34.458	0	81.118	2472500000	67					Intracellular	0.9345	Intracellular	0.9032	0	0.0968	1.76081	0.00029724	-3.59245	-1.88729	+		+	66839500	12033900	16707200	5435480	4	3	13	15	17	16	0	2	1	0	3	524490000	641260000	754130000	490770000	0	19790000
P21533;F1LQS3;A0A0G2KBA1	60S ribosomal protein L6	Rpl6	7	7	7	29.5	33.561	0	26.718	1340700000	38					Intracellular	0.9345	Intracellular	0.907	0.0001	0.093	2.89982	0	-5.61433	-3.14554	+		+	38466100	1997000	28478400	NA	4	1	10	12	8	7	0	1	0	0	0	454840000	319570000	468370000	95126000	0	1612500
B0K031;P05426;Q7TP62;F1LUE9	60S ribosomal protein L7	Rpl7	14	14	14	45.8	30.313	0	57.273	2265200000	62					Intracellular	0.9345	Intracellular	0.9923	0	0.0077	6.14583	0	-6.40506	-5.81279	+		+	65634000	NA	18348600	NA	4	0	12	14	19	15	0	1	0	0	1	703860000	461380000	831530000	268460000	0	0
F1M013;P62425;D3ZU22;D3ZPL5;D3ZJH5;M0R3M3;D4A6B9;F1M1M2;D3ZNA3;F1M4C7;D4A8X2;F1M0S7;F1M2Q3;A0A0G2K6A5;M0R7A4;D3ZD15	60S ribosomal protein L7a	LOC100910109;Rpl7a;LOC100361311;RGD1562953;LOC100911966	11	11	9	43.8	29.864	0	98.979	1701200000	56					Intracellular	0.9345	Intracellular	0.7673	0	0.2326	3.6049	0	-5.89242	-3.76854	+		+	48217500	2292100	27996900	NA	4	1	18	16	12	10	0	0	0	0	0	561860000	386440000	504120000	216430000	0	0
D4A6W6;P62919	60S ribosomal protein L8	RGD1561333;Rpl8	6	6	6	33.1	28.156	0	106.07	1490700000	37					Intracellular	0.9345	Intracellular	0.9228	0	0.0771	6.67182	0	-5.6247	-5.53485	+		+	41582200	NA	7972450	NA	4	0	8	9	11	9	0	0	0	0	0	452970000	304010000	433360000	240600000	0	16967000
A0A0G2JXD0;P17077;M0RBD4;M0R6B4;F1M7A9;M0R5Y8;A0A0G2JX41;D3ZA49	60S ribosomal protein L9	Rpl9;LOC100911472;LOC100910002;RGD1561928	11	11	11	66.5	21.424	0	92.895	1521800000	54					Intracellular	0.9345	Intracellular	0.9126	0	0.0874	3.7523	0	-5.66099	-3.79924	+		+	42426700	NA	7225490	NA	4	0	12	13	13	16	0	0	0	0	0	400720000	442940000	418390000	259770000	0	0
P85968;A0A0G2K7Q8	6-phosphogluconate dehydrogenase, decarboxylating	Pgd	22	22	22	62.1	53.236	0	182.52	2743700000	150					UPS	0.5229	Intracellular	0.8749	0.0298	0.0953	0.598262	0.0158364	-2.13882	-0.859505	+		+	65862700	45252000	21957900	3500330	4	3	31	30	22	29	0	12	14	0	12	754370000	728070000	360770000	508660000	0	157950000
P85971;G3V8D5	6-phosphogluconolactonase	Pgls	12	12	12	87.2	27.234	0	127.71	1383200000	84					UPS	0.5401	Intracellular	0.8402	0.0416	0.1182	1.31152	0.00295923	-1.63768	-1.11829	+		+	33313000	13287300	4567140	7293970	4	4	12	15	15	17	0	11	6	1	7	312710000	327880000	371570000	253350000	0	45571000
P06761	78 kDa glucose-regulated protein	Hspa5	41	41	39	57	72.346	0	323.31	44200000000	661	+		+		Signal-peptide	0.9756	Signal-peptide	0.0013	0.9756	0.0232	3.21242	0.000148541	-2.79986	-2.27924	+		+	1168810000	184484000	157168000	77715300	4	4	140	152	115	146	0	33	28	14	33	10400000000	12400000000	11800000000	7673700000	0	580160000
A2VD09;Q9QZM5	Abl interactor 1	Abi1	2	2	2	5.6	52.331	0	7.1665	64678000	12					Intracellular	0.588	Intracellular	0.9445	0.0004	0.0551	2.67082	0.000743012	-1.77503	-1.54988	+		+	2264330	NA	419098	NA	3	0	3	3	6	0	0	0	0	0	0	17966000	20095000	22411000	4206500	0	0
Q9JMI1	Acetoacetyl-CoA synthetase	Aacs	3	3	3	8.9	75.039	0	6.9786	30358000	9					Intracellular	0.5449	Intracellular	0.8113	0.0001	0.1886	0.0718012	0.810472	0.0930448	0.0736253				955043	NA	215203	NA	3	0	3	3	1	2	0	0	0	0	0	6143300	9883600	6781700	7549700	0	0
Q5XI22;F1LS48;A0A0G2JUB4;D3ZKB6;A0A096MJY8	Acetyl-CoA acetyltransferase, cytosolic	Acat2;RGD1562948	8	8	8	37.8	41.108	0	19.617	272030000	25					Intracellular	0.5364	Intracellular	0.9497	0.0454	0.0049	0.480098	0.0551011	-1.37898	-0.655348				6065530	5626730	1419450	676262	4	3	4	1	5	7	0	3	1	0	4	48178000	38381000	70857000	71471000	0	15089000
P17764	Acetyl-CoA acetyltransferase, mitochondrial	Acat1	14	14	14	45.5	44.695	0	60.68	1178800000	51					Intracellular	0.5366	Intracellular	0.9396	0.0031	0.0573	4.46334	0	-5.96797	-4.43742	+		+	35185500	NA	7190020	NA	4	0	10	12	11	18	0	0	0	0	0	309530000	284800000	222660000	360590000	0	0
A0A0G2K8T0;Q6P7S1	Acid ceramidase	Asah1	9	9	9	36.2	48.282	0	162.56	549590000	38	+			+	Signal-peptide	0.9824	Signal-peptide	0.0027	0.9824	0.0149	2.71	0.000204629	-2.90747	-2.14493	+		+	15098500	3913250	1749080	2031730	4	2	9	7	6	13	0	0	0	3	0	118880000	143360000	133780000	128570000	0	0
A0A0G2K7X0;F7EL36;P49911	Acidic leucine-rich nuclear phosphoprotein 32 family member A	Anp32a	7	7	7	37.6	26.316	0	319.74	383440000	35					Intracellular	0.543	Intracellular	0.9263	0	0.0737	3.7098	0	-4.04583	-3.10762	+		+	10895300	NA	908764	NA	4	0	10	7	7	11	0	0	0	0	0	85232000	99821000	91219000	107170000	0	0
Q9EST6;F1LP34	Acidic leucine-rich nuclear phosphoprotein 32 family member B	Anp32b	6	6	6	23.5	31.06	0	32.82	474990000	21					Intracellular	0.5875	Intracellular	0.7275	0.0038	0.2688	4.57108	0	-4.15344	-3.57054	+		+	14241300	NA	2631130	NA	4	0	4	6	5	6	0	0	0	0	0	85162000	108190000	85844000	195790000	0	0
Q9ER34	Aconitate hydratase, mitochondrial	Aco2	33	33	33	59	85.432	0	323.31	7985800000	222					Intracellular	0.565	Intracellular	0.9351	0.0023	0.0626	3.15074	0	-6.88576	-3.65867	+		+	227572000	14846000	90904400	NA	4	1	61	55	43	63	0	0	0	0	0	1976600000	2290000000	1568400000	2092100000	0	24641000
G3V6S2;Q63270	Aconitate hydratase;Cytoplasmic aconitate hydratase	Aco1	7	7	7	15.9	98.191	0	22.71	70983000	17					Intracellular	0.5668	Intracellular	0.9358	0.0001	0.0641	1.31486	0.00562784	-1.38586	-1.01827	+		+	2403000	1421500	279626	NA	3	1	6	1	7	3	0	0	0	0	0	17784000	2419600	32970000	14815000	0	0
A0A0G2JVI5;G3V6Z3;Q8VH46	Actin filament-associated protein 1	Afap1	4	4	4	6.6	81.961	0	4.9469	40491000	10					Intracellular	0.7337	Intracellular	0.9391	0.0101	0.0508	0.459278	0.325944	-0.373744	-0.320369				1207790	NA	296040	NA	4	0	3	2	2	3	0	0	0	0	0	9593800	14536000	6043000	10318000	0	0
P68035	Actin, alpha cardiac muscle 1	Actc1	38	16	0	89.7	42.019	0	323.31	158000000000	975					Intracellular	0.5585	Intracellular	0.8326	0.0002	0.1673	2.9688	9.72e-05	-4.00762	-2.70446	+		+	4078050000	316493000	659479000	175738000	4	4	215	230	217	217	0	33	27	2	34	34800000000	41800000000	42600000000	34700000000	0	1465900000
P62738;A0A0G2K4M6;P63269	Actin, aortic smooth muscle;Actin, gamma-enteric smooth muscle	Acta2;Actg2	37	1	1	89.7	42.009	0	5.6342	5716600000	55					Intracellular	0.5585	Intracellular	0.7907	0.0001	0.2092	2.57373	0	-5.95525	-2.96061	+		+	153972000	28304000	26491400	NA	4	1	13	11	10	16	0	1	2	0	2	1327200000	1748100000	1532400000	1013900000	0	43524000
P60711;A0A0G2K3K2	Actin, cytoplasmic 1;Actin, cytoplasmic 1, N-terminally processed	Actb	44	44	2	97.1	41.736	0	323.31	876000000000	3081					Intracellular	0.5564	Intracellular	0.8695	0.0001	0.1304	3.09652	9.96e-05	-3.98119	-2.76375	+		+	23059500000	1834340000	1135960000	1144040000	4	4	622	688	636	705	8	133	119	32	138	196000000000	229000000000	222000000000	191000000000	29465000	12400000000
P63259	Actin, cytoplasmic 2;Actin, cytoplasmic 2, N-terminally processed	Actg1	43	1	1	97.1	41.792	0	323.31	4318100000	52					Intracellular	0.5564	Intracellular	0.8838	0.0001	0.116	1.84486	0.000149134	-5.51898	-2.28265	+		+	74321700	NA	27048800	NA	3	0	6	3	6	6	0	10	7	3	11	1611700000	323140000	1729900000	396170000	0	70730000
Q5M7U6	Actin-related protein 2	Actr2	13	13	13	48	44.733	0	160.8	1575200000	107					Intracellular	0.5666	Intracellular	0.9154	0.0004	0.0842	0.975976	0.00218954	-2.39939	-1.16438	+		+	36108500	16283700	4224170	852097	4	3	21	22	28	24	0	4	5	0	3	359670000	364350000	413040000	326000000	0	38357000
O88656	Actin-related protein 2/3 complex subunit 1B	Arpc1b	16	16	15	59.4	41.056	0	62.462	2035400000	67					Intracellular	0.5341	Intracellular	0.9181	0.0003	0.0816	2.07081	0.000299145	-2.99142	-1.89604	+		+	55893700	11905700	8321130	1065420	4	3	17	16	13	14	0	4	0	0	3	480080000	431990000	611330000	420590000	0	32834000
A0A0G2K9A2;P85970;A0A0G2K905;A0A0G2K2J1;A0A0G2K1V8	Actin-related protein 2/3 complex subunit 2	Arpc2	13	13	13	55.3	34.347	0	127.06	1536900000	80					UPS	0.5504	Intracellular	0.9825	0.0002	0.0174	1.00938	0.0015182	-2.66786	-1.23397	+		+	38813300	16065000	1759750	5205530	4	3	13	22	11	16	0	6	5	0	7	346140000	382610000	378770000	323360000	364430	47428000
B2GV73	Actin-related protein 2/3 complex subunit 3	Arpc3	6	6	6	38.8	20.535	0	32.158	410790000	29					UPS	0.6004	Intracellular	0.902	0.0005	0.0975	0.72565	0.013477	-1.79067	-0.89273	+		+	8891630	5793100	2257150	1501440	4	3	4	5	5	8	0	3	3	0	1	113810000	85157000	99815000	74864000	0	13294000
Q4KLF8;A0A0G2K585;A0A0U1RRQ2	Actin-related protein 2/3 complex subunit 5	Arpc5	4	4	4	43.7	16.32	0	62.045	578510000	25					UPS	0.5974	Intracellular	0.9425	0.0001	0.0574	4.08461	0	-3.98663	-3.25685	+		+	16125500	NA	3061470	NA	4	0	7	6	7	4	0	1	0	0	0	140590000	141490000	203510000	70288000	0	14409000
A1L108	Actin-related protein 2/3 complex subunit 5-like protein	Arpc5l	4	4	4	41.2	17.01	0	15.36	212300000	17					Intracellular	0.596	Intracellular	0.9877	0	0.0122	1.77788	0.000361905	-2.77794	-1.68857	+		+	6277650	NA	1561630	NA	4	0	7	4	3	3	0	0	0	0	0	69159000	36851000	57653000	48632000	0	0
Q4V7C7;A0A0G2K1C0;F1LY09	Actin-related protein 3	Actr3	16	16	16	59.6	47.357	0	123.09	3281100000	130					Intracellular	0.5469	Intracellular	0.9089	0.0003	0.0908	1.26801	0.00395633	-1.57005	-1.07786	+		+	84858200	35203200	11948600	18590600	4	4	17	31	31	27	0	8	7	3	6	536890000	782390000	811300000	622660000	38229000	163190000
G3V9E4;P13676	Acylamino-acid-releasing enzyme	Apeh	4	4	4	9.8	81.367	0	44.454	50191000	16					Intracellular	0.5523	Intracellular	0.7258	0.0079	0.2663	0.110003	0.684286	-0.169331	-0.123643				1939000	NA	219970	NA	3	0	2	3	6	4	0	0	0	0	1	0	13271000	21457000	15463000	0	0
Q499N5	Acyl-CoA synthetase family member 2, mitochondrial	Acsf2	9	9	9	26.3	67.886	0	38.908	82284000	27					Signal-peptide	0.4779	Signal-peptide	0.3429	0.4779	0.1792	2.24688	0.000934132	-1.77618	-1.45285	+		+	2469500	NA	983801	NA	4	0	12	5	6	4	0	0	0	0	0	35446000	26781000	6777700	13279000	0	0
P11030;Q6TXF3	Acyl-CoA-binding protein;Triakontatetraneuropeptide;Octadecaneuropeptide	Dbi	3	3	3	55.2	10.027	0	5.7378	290020000	8					UPS	0.6338	Intracellular	0.9744	0	0.0256	3.06006	8.95e-05	-3.52157	-2.55996	+		+	7890050	NA	5488200	NA	4	0	1	1	3	2	0	0	0	0	1	67501000	24158000	145410000	38533000	0	8582600
Q6IMX8;O55171;O88267;A0A0G2K7Z3;D3ZIQ1;A1A5R4;A0A0G2K4M8	Acyl-coenzyme A thioesterase 2, mitochondrial;Acyl-coenzyme A thioesterase 1	Acot2;Acot1	9	9	9	35.5	49.628	0	35.971	425180000	35					Intracellular	0.5459	Intracellular	0.9115	0.0045	0.084	3.15879	0.000100539	-3.9442	-2.78223	+		+	12711400	NA	4426610	NA	4	0	10	9	3	13	0	0	0	0	0	127180000	138620000	58083000	101310000	0	0
P70470	Acyl-protein thioesterase 1	Lypla1	4	4	4	27.8	24.708	0	8.2523	164820000	14					UPS	0.6181	Intracellular	0.8524	0.0095	0.1381	5.19606	0	-3.54392	-3.40104	+		+	4677900	NA	668487	NA	4	0	6	4	1	2	0	1	0	0	0	53501000	51169000	18664000	32973000	0	0
Q63768	Adapter molecule crk	Crk	3	3	3	16.4	33.844	0	34.048	101610000	15					UPS	0.57	Intracellular	0.9645	0	0.0355	3.636	0.00042344	-1.70406	-1.67397	+		+	2987700	NA	365971	NA	4	0	8	2	2	3	0	0	0	0	0	24930000	21249000	31276000	24155000	0	0
P36972	Adenine phosphoribosyltransferase	Aprt	11	11	11	85	19.546	0	103.65	1201600000	63					UPS	0.5505	Intracellular	0.9421	0.0004	0.0575	2.1767	0.000297872	-2.83045	-1.89036	+		+	34341200	7255230	10763700	1765300	4	3	13	17	7	8	0	9	4	0	5	305570000	331570000	186860000	305460000	0	30020000
A0A140TAI8;B5DFN2	Adenosylhomocysteinase	Ahcyl1	5	5	2	18.1	52.895	0	11.006	131540000	17					Intracellular	0.5448	Intracellular	0.9166	0.0001	0.0833	2.80909	0.000576117	-1.76859	-1.57475	+		+	3871600	NA	781545	NA	4	0	9	4	2	2	0	0	0	0	0	40609000	38476000	32466000	19987000	0	0
P10760	Adenosylhomocysteinase	Ahcy	11	11	11	41.2	47.538	0	56.709	1093400000	52					Transmembrane	0.7094	Transmembrane	0.2665	0.0241	0.7094	1.43121	0.00110016	-2.20856	-1.35717	+		+	27321000	10643600	3657300	3971700	4	3	11	7	11	14	0	1	3	0	5	279590000	216180000	262150000	280860000	0	16782000
A0A0G2JSG6;P29410	Adenylate kinase 2, mitochondrial;Adenylate kinase 2, mitochondrial, N-terminally processed	Ak2	9	9	9	58.6	25.529	0	38.257	898670000	42					UPS	0.5504	Intracellular	0.9584	0.0006	0.0411	1.2397	0.00219286	-1.89088	-1.1767	+		+	22214300	10403600	2978580	1463940	4	3	6	9	10	11	0	2	2	0	2	195410000	206440000	197820000	238960000	0	19590000
P39069;A0A0G2K7Q6;M0RC66	Adenylate kinase isoenzyme 1	Ak1	8	8	8	55.7	21.584	0	18.778	469750000	28					UPS	0.5325	Intracellular	0.9053	0.0058	0.0889	1.0877	0.00267764	-1.97647	-1.13191	+		+	11984300	5758900	3389680	2444410	4	3	8	3	8	3	0	2	2	0	2	99775000	95289000	160130000	66435000	0	24081000
D3ZW08	Adenylosuccinate lyase	Adsl	3	3	3	12	54.852	0	7.5153	62343000	7					Intracellular	0.6295	Intracellular	0.8808	0.0505	0.0686	1.45132	0.00535323	-1.31441	-1.02206	+		+	1792070	NA	418184	NA	4	0	0	3	2	2	0	0	0	0	0	9188200	16268000	15474000	19573000	883640	956330
D4AEP0;M0R629	Adenylosuccinate synthetase isozyme 2	Adss	10	10	10	34.6	50.085	0	23.388	304720000	27					Intracellular	0.563	Intracellular	0.9689	0.0005	0.0306	4.0168	0.000103704	-3.26112	-2.81955	+		+	8698100	NA	3000080	NA	4	0	4	6	12	5	0	0	0	0	0	48977000	53983000	138650000	60031000	0	0
Q08163	Adenylyl cyclase-associated protein 1	Cap1	24	24	23	68.4	51.588	0	239.79	6546900000	177					UPS	0.5072	Intracellular	0.9253	0.0002	0.0745	1.85738	0.00036019	-2.63198	-1.68044	+		+	174668000	37388100	11548800	21641200	4	4	37	38	37	33	0	8	9	3	12	1565800000	1512300000	1507200000	1593200000	0	107970000
Q6P9Y4;Q05962;A0A1W2Q605;D3ZB81	ADP/ATP translocase 1	Slc25a4	20	20	11	56.7	32.904	0	323.31	17600000000	256		+			UPS	0.573	Intracellular	0.6919	0.0539	0.2542	5.80973	0	-9.50243	-7.25146	+		+	507777000	657986	308789000	59356.9	4	3	73	72	58	46	0	2	2	3	0	5619800000	5515300000	3832300000	2665800000	0	4889400
Q09073	ADP/ATP translocase 2;ADP/ATP translocase 2, N-terminally processed	Slc25a5	18	9	9	55.7	32.901	0	46.64	3330000000	49		+			UPS	0.5712	Intracellular	0.7453	0.0189	0.2357	4.97522	0	-6.74597	-5.17903	+		+	98506000	NA	29861300	NA	4	0	17	12	7	13	0	0	0	0	0	1100000000	1001400000	615750000	604850000	0	0
F1LSX3;Q63072	ADP-ribosyl cyclase/cyclic ADP-ribose hydrolase 2	Bst1	2	2	2	8.2	35.131	0.0031226	2.7977	47016000	7	+			+	Signal-peptide	0.9693	Signal-peptide	0.0125	0.9693	0.0182	0.883021	0.30115	-0.3376	-0.339963				1616100	NA	227995	NA	3	0	1	1	2	3	0	0	0	0	0	11488000	13406000	4210500	14797000	0	3114700
P84079;A0A0G2JV81;A0A0G2K9H8;P61206;P84082;A0A0G2K4Q4	ADP-ribosylation factor 1;ADP-ribosylation factor 3;ADP-ribosylation factor 2	Arf1;Arf3;Arf2	14	14	8	79.6	20.697	0	116.84	1850000000	83					UPS	0.5703	Intracellular	0.8034	0.0003	0.1963	3.82637	0	-5.62554	-3.83977	+		+	50902500	1843900	29316400	686459	4	2	13	22	28	19	0	0	1	0	0	326830000	451440000	692160000	376250000	0	2457200
P61751	ADP-ribosylation factor 4	Arf4	13	8	7	81.7	20.396	0	66.9	1149800000	67					UPS	0.5682	Intracellular	0.7666	0.0111	0.2223	4.89555	0	-5.38164	-4.43392	+		+	31236800	NA	5967460	NA	4	0	17	16	21	13	0	0	0	0	0	286990000	242740000	433110000	186950000	0	0
P84083	ADP-ribosylation factor 5	Arf5	10	3	3	68.9	20.529	0	13.044	94593000	11					UPS	0.5712	Intracellular	0.7413	0.0122	0.2465	2.93011	0.000209738	-2.81469	-2.18675	+		+	2763050	NA	1215880	NA	4	0	2	4	3	2	0	0	0	0	0	35280000	20221000	29908000	9184200	0	0
Q62848;Q3S4A4;Q3S4A5	ADP-ribosylation factor GTPase-activating protein 1	Arfgap1	4	4	4	18.3	45.442	0	7.763	70728000	12					Intracellular	0.6422	Intracellular	0.7998	0.0003	0.1998	1.85221	0.00251163	-1.37375	-1.14377	+		+	2070920	NA	361872	NA	4	0	3	2	4	3	0	0	0	0	0	14824000	17285000	22976000	15644000	0	0
Q3MID3	ADP-ribosylation factor GTPase-activating protein 2	Arfgap2	7	7	6	23.1	56.556	0	17.688	114920000	15					Intracellular	0.624	Intracellular	0.7712	0.0048	0.224	3.27091	0.000247241	-2.19365	-1.94587	+		+	3353930	NA	506614	NA	4	0	3	2	5	5	0	0	0	0	0	26852000	32253000	36938000	18874000	0	0
P61212	ADP-ribosylation factor-like protein 1	Arl1	5	5	5	45.3	20.411	0	14.169	226970000	23					UPS	0.5667	Intracellular	0.7875	0.0145	0.198	3.08558	0.000151967	-2.97298	-2.32158	+		+	6649630	NA	571559	NA	4	0	7	6	7	3	0	0	0	0	0	62203000	68306000	63343000	33120000	0	0
O08697;G3V8V0;A0A1B0GWW8	ADP-ribosylation factor-like protein 2	Arl2	3	3	3	31.5	20.836	0	7.8453	30265000	10					UPS	0.5692	Intracellular	0.983	0.0002	0.0169	0.78197	0.163543	0.544808	0.475884				1039620	NA	180165	NA	3	0	3	1	4	2	0	0	0	0	0	9604400	7237400	10222000	3201500	0	0
P37996;F8WG91	ADP-ribosylation factor-like protein 3	Arl3	7	7	7	58.8	20.456	0	24.846	191410000	23					UPS	0.5565	Intracellular	0.9476	0.0012	0.0512	1.06106	0.0070014	-1.51186	-0.982091	+		+	4400080	3613800	1020640	1501470	4	2	4	6	5	4	0	3	1	0	0	39734000	46327000	47861000	43839000	0	3836400
Q66HA6	ADP-ribosylation factor-like protein 8B	Arl8b	8	8	3	59.1	21.539	0	24.969	963250000	30					UPS	0.5693	Intracellular	0.7726	0.0292	0.1981	7.64132	0	-4.92843	-5.29747	+		+	26285800	NA	3479570	NA	4	0	7	7	8	8	0	0	0	0	0	320550000	274350000	232630000	135710000	0	0
A0A140TAD1;Q6AY63	ADP-sugar pyrophosphatase	Nudt5	2	2	2	11	24.13	0.00040371	3.111	47454000	9					UPS	0.599	Intracellular	0.9948	0.0002	0.005	0.794025	0.0828554	-0.756593	-0.594418				1612530	NA	117100	NA	3	0	3	2	1	3	0	0	0	0	0	12090000	6482800	15289000	13593000	0	0
A0A0G2K3V2;A0A0A0MXY9;Q8CG45	Aflatoxin B1 aldehyde reductase member 2	Akr7a2	3	3	3	18.4	37.526	0	10.766	69168000	11					UPS	0.569	Intracellular	0.7466	0.0021	0.2513	0.501619	0.100061	-0.926403	-0.563112				2653070	NA	465455	NA	3	0	5	2	2	2	0	0	0	0	0	27492000	21807000	3717600	16151000	0	0
Q5QD51	A-kinase anchor protein 12	Akap12	9	9	9	13	181.11	0	44.873	244190000	30					Intracellular	0.5456	Intracellular	0.9482	0.0002	0.0516	3.74722	9.23e-05	-3.06533	-2.61007	+		+	7224320	NA	476603	NA	4	0	6	5	10	9	0	0	0	0	0	58755000	56900000	63408000	65125000	0	0
F1LPQ9;Q5U301	A-kinase anchor protein 2	Akap2	4	4	4	8	95.941	0	259.76	200410000	14					Intracellular	0.6843	Intracellular	0.9456	0	0.0544	3.05727	0.000206642	-2.67747	-2.1624	+		+	5769330	NA	902255	NA	4	0	2	0	6	6	0	0	0	0	0	42829000	20091000	93636000	42989000	865070	0
P50475	Alanine--tRNA ligase, cytoplasmic	Aars	29	29	29	49.2	106.79	0	323.31	1868400000	132					Intracellular	0.5677	Intracellular	0.912	0	0.088	2.82315	0.000110891	-4.91868	-2.90549	+		+	52904800	5238200	4459650	2577120	4	2	30	28	35	38	0	0	0	0	1	327110000	379390000	594560000	516300000	0	18406000
P51635	Alcohol dehydrogenase [NADP(+)]	Akr1a1	17	17	17	66.2	36.505	0	111.54	3172900000	106					UPS	0.5558	Intracellular	0.8986	0.0004	0.1011	1.01084	0.0124405	-1.34122	-0.903857	+		+	76731200	36793900	22435500	19940700	4	4	23	14	21	15	0	9	11	3	10	544350000	528930000	1204300000	497820000	0	120940000
P11884;F1LN88;G3V7I5;A0A0H2UHP1;P51647;P13601;Q63639;Q66HF8	Aldehyde dehydrogenase, mitochondrial	Aldh2	26	26	26	69.9	56.488	0	242.84	4298300000	142					UPS	0.5097	Intracellular	0.901	0.0072	0.0918	3.88435	0	-6.88502	-4.31717	+		+	127392000	2413600	65510000	NA	4	1	36	43	23	40	0	0	0	0	0	1133800000	1249200000	743670000	1154100000	5326300	0
A0A0G2JY43;G3V9W6;P30839	Aldehyde dehydrogenase;Fatty aldehyde dehydrogenase	Aldh3a2	4	4	4	9.9	65.387	0	10.786	187820000	20		+			Intracellular	0.5484	Intracellular	0.8175	0.0164	0.1661	2.73218	0.000302376	-2.38055	-1.90404	+		+	5556800	NA	1119120	NA	4	0	5	7	4	4	0	0	0	0	0	38811000	52920000	45809000	50278000	0	0
P07943	Aldose reductase	Akr1b1	12	12	11	50	35.797	0	134.37	2306700000	83					UPS	0.6368	Intracellular	0.9399	0.0001	0.06	0.79282	0.0170766	-1.43919	-0.846307	+		+	56198200	31002000	4940990	23786600	4	4	16	17	17	17	0	3	2	1	10	408510000	408220000	588020000	557140000	0	115060000
P08289;A0A0G2K0X8	Alkaline phosphatase, tissue-nonspecific isozyme	Alpl	10	10	10	25	57.659	0	34.428	402110000	39	+			+	Signal-peptide	0.6601	Signal-peptide	0.1558	0.6601	0.1841	1.50941	0.000574024	-2.83886	-1.56675	+		+	10738500	7543300	6610760	NA	4	1	6	10	8	14	0	0	0	0	1	22335000	64477000	85540000	218930000	0	1330100
Q09325	Alpha-1,3-mannosyl-glycoprotein 2-beta-N-acetylglucosaminyltransferase	Mgat1	4	4	4	14.3	51.585	0	9.4178	37059000	8		+			Transmembrane	0.8538	Transmembrane	0.0013	0.1449	0.8538	0.0542049	0.851466	0.0724192	0.0570108				894943	NA	599008	NA	4	0	0	1	4	1	0	0	0	2	0	3749700	4547300	20898000	4627400	0	0
G3V6Y6;P53534;G3V8V3;P09812	Alpha-1,4 glucan phosphorylase;Glycogen phosphorylase, brain form	Pygb	16	16	13	27.2	96.774	0	54.554	644010000	62					Intracellular	0.7017	Intracellular	0.8908	0.0002	0.109	3.10955	9.35e-05	-3.64432	-2.63509	+		+	18118500	3667300	3940760	NA	4	1	12	10	15	22	0	1	1	0	1	146360000	131810000	212070000	140980000	0	2226200
Q99068	Alpha-2-macroglobulin receptor-associated protein	Lrpap1	7	7	7	28.9	42.031	0	11.637	202830000	18	+			+	Signal-peptide	0.9686	Signal-peptide	0.0007	0.9686	0.0307	4.87519	0.000105066	-2.90535	-2.83401	+		+	5956500	NA	1826550	NA	4	0	2	6	5	5	0	0	0	0	0	30697000	78892000	50837000	42402000	0	0
Q9Z1P2;Q6T487;Q6GMN8;D3ZCV0	Alpha-actinin-1	Actn1	65	45	45	83.3	102.96	0	323.31	19000000000	512					Intracellular	0.7007	Intracellular	0.6465	0.0276	0.3259	0.715232	0.0173493	-1.58172	-0.842265	+		+	435470000	232948000	79369000	155036000	4	4	88	86	90	104	0	38	39	4	63	3557100000	4295800000	3871500000	4732700000	1368300	699430000
A0A0G2K013;Q9QXQ0;A0A0G2K5U9;Q8R4I6;A0A0G2K677	Alpha-actinin-4	Actn4	66	66	46	81.2	102.97	0	323.31	46900000000	963					Intracellular	0.6256	Intracellular	0.6691	0.0471	0.2838	0.899669	0.0177014	-1.27324	-0.839469	+		+	1072050000	568557000	118600000	316880000	4	4	166	171	162	180	0	92	68	26	98	10600000000	10900000000	9630000000	9219700000	0	2503200000
D3ZZ99;A0A0G2JSM7;Q63028	Alpha-adducin	Add1	3	3	3	9.3	74.785	0	9.3831	46816000	12					Intracellular	0.7165	Intracellular	0.9561	0.0001	0.0438	0.567991	0.1335	-0.713594	-0.514168				1918570	NA	608767	NA	3	0	5	2	1	4	0	0	0	0	0	12442000	12341000	0	22033000	0	0
Q64057	Alpha-aminoadipic semialdehyde dehydrogenase	Aldh7a1	13	13	13	37.3	58.748	0	88.193	1168100000	52					Intracellular	0.6242	Intracellular	0.8718	0.0028	0.1254	3.96063	0	-4.9106	-3.63899	+		+	33882800	3012800	6863440	NA	4	1	15	9	10	17	0	1	0	0	0	314710000	336070000	231300000	280970000	0	2848600
P85515	Alpha-centractin	Actr1a	10	10	6	43.4	42.613	0	87.983	769740000	61					Intracellular	0.5602	Intracellular	0.8881	0.0001	0.1118	2.34974	0.000209215	-3.44206	-2.18032	+		+	21466200	3357200	2828900	242871	4	3	13	15	12	13	0	2	2	0	4	185900000	164090000	216050000	180520000	0	6107100
P23928	Alpha-crystallin B chain	Cryab	7	7	7	62.9	20.089	0	72.306	300350000	30					Intracellular	0.9345	Intracellular	0.8809	0.0023	0.1168	3.68858	0	-3.95936	-3.05619	+		+	8646400	NA	3136860	NA	4	0	9	8	11	2	0	0	0	0	0	84040000	86728000	106080000	21847000	1657400	0
M0R5J4;P04764;A0A0G2K4Y2;F1M9V3	Alpha-enolase	Eno1	28	28	24	74.4	47.074	0	323.31	19700000000	422					UPS	0.5017	Intracellular	0.9707	0	0.0293	1.67398	0.00148946	-1.6832	-1.25293	+		+	497460000	178498000	92058600	86352400	4	4	76	73	92	73	0	40	25	10	33	4180000000	3897700000	6270700000	3285300000	0	766220000
Q6P762	Alpha-mannosidase	Man2b1	14	14	14	22.9	114.33	0	44.5	603160000	60	+			+	Signal-peptide	0.6078	Signal-peptide	0.0007	0.6078	0.3915	0.72229	0.188777	-0.511302	-0.446305				13203700	9158750	4488890	2726950	4	4	10	16	7	14	0	0	1	7	5	119850000	157810000	82677000	159170000	0	8542400
P28494;Q7TP82	Alpha-mannosidase 2;Alpha-mannosidase	Man2a1	20	20	20	26.2	131.24	0	42.679	533030000	75		+			Transmembrane	0.6756	Transmembrane	0.181	0.1434	0.6756	0.0359307	0.912967	0.0376353	0.032387				9498830	8924350	4458100	533620	4	4	8	11	16	19	0	2	4	7	8	50255000	94085000	214360000	116090000	0	12720000
Q5M9I2;F1LPQ3;P21139	Alpha-mannosidase;Alpha-mannosidase 2C1	Man2c1	7	7	7	9.7	115.84	0	12.297	44656000	12					Intracellular	0.5511	Intracellular	0.9508	0.0001	0.0491	0.639157	0.0867254	-0.836757	-0.586942				1321470	NA	366891	NA	4	0	4	3	0	5	0	0	0	0	0	11527000	12704000	2488800	16757000	0	0
Q66H12	Alpha-N-acetylgalactosaminidase	Naga	10	10	10	39.8	46.871	0	60.97	822000000	57	+			+	Signal-peptide	0.9116	Signal-peptide	0.0228	0.9116	0.0656	1.35604	0.0232649	-0.922803	-0.793305	+		+	18759300	9901600	5744990	3330450	4	4	11	16	4	12	0	2	2	4	6	246100000	243360000	57166000	185310000	0	9963100
Q9HB97;G3V818;D3ZKG5	Alpha-parvin	Parva	10	10	10	37.1	42.291	0	202.48	441920000	41					UPS	0.5075	Intracellular	0.9612	0.0004	0.0385	5.02251	0	-4.00797	-3.66674	+		+	12587300	NA	835500	NA	4	0	10	5	14	12	0	0	0	0	0	106400000	91487000	137540000	93726000	0	4639000
P54921;F8WFM2	Alpha-soluble NSF attachment protein	Napa	9	9	9	46.4	33.192	0	19.333	244800000	20					UPS	0.6135	Intracellular	0.9974	0.0001	0.0025	3.64112	0.00016092	-2.7676	-2.39978	+		+	7016000	NA	1743200	NA	4	0	4	3	8	5	0	0	0	0	0	78729000	41543000	65247000	51947000	0	0
G3V9Z3;P21396	Amine oxidase [flavin-containing] A	Maoa	12	12	12	40.1	59.52	0	116.95	900280000	52		+			Intracellular	0.5454	Intracellular	0.7086	0.0018	0.2896	3.75398	0	-4.87054	-3.49577	+		+	26869800	NA	11195000	NA	4	0	17	21	5	9	0	0	0	0	0	338300000	328690000	99413000	133880000	0	0
Q9Z1J7;D3ZJ25	Amino acid transporter	Slc1a5	4	4	4	10.8	56.755	0	7.8927	62302000	8		+			Transmembrane	0.7494	Transmembrane	0.0034	0.2472	0.7494	0.291083	0.307279	-0.516896	-0.335419				1617690	1305800	1221840	NA	4	1	1	0	5	2	0	0	0	0	0	7822300	3920500	39364000	7027000	0	0
Q76GL9	Amino acid transporter	Slc1a4	4	4	4	12.1	55.9	0	15.042	218410000	19		+			Transmembrane	0.7483	Transmembrane	0.0418	0.2099	0.7483	0.87596	0.0125734	-1.50166	-0.902166	+		+	5074950	4206400	1649180	1640340	4	2	1	1	5	3	0	1	3	2	3	37414000	32057000	67905000	58810000	0	1934000
Q32PX2;A0A0U1RRR6	Aminoacyl tRNA synthase complex-interacting multifunctional protein 2	Aimp2	9	9	9	53.8	35.442	0	154.26	307960000	52					UPS	0.6216	Intracellular	0.9886	0.0003	0.0111	3.48866	8.31e-05	-2.91896	-2.43829	+		+	8668100	NA	934354	NA	4	0	11	13	18	10	0	0	0	0	0	73846000	80126000	88697000	62763000	0	1398700
G3V7W7;A0A0G2JVE6;P15684	Aminopeptidase N	Anpep	11	11	11	25	109.19	0	143.14	270690000	35		+			Transmembrane	0.8856	Transmembrane	0.001	0.1134	0.8856	1.19189	0.00444476	-1.57121	-1.05146	+		+	6595800	4431900	2585020	928151	4	2	6	10	4	13	0	1	0	0	1	61860000	61277000	28258000	95749000	1492800	6194600
Q5U312	Ankycorbin	Rai14	10	10	10	19	109.13	0	23.441	436010000	38					Intracellular	0.5264	Intracellular	0.9808	0.0001	0.0191	2.74753	9.09e-05	-4.03839	-2.59115	+		+	12911700	NA	2555810	NA	4	0	9	5	9	15	0	0	0	0	0	94589000	96848000	115350000	129220000	0	0
Q5XI77	Annexin	Anxa11	5	5	5	13.3	54.16	0	12.604	156780000	21					Intracellular	0.5767	Intracellular	0.8764	0.0002	0.1234	0.770535	0.0308291	-1.14357	-0.746103	+		+	3356530	3652250	398663	1088310	4	2	5	3	2	6	0	2	1	0	2	50813000	25873000	36163000	28493000	0	7227100
Q6IRJ7	Annexin	Anxa7	5	5	5	13.2	50.019	0	8.2572	236730000	9					Intracellular	0.5773	Intracellular	0.8795	0.0003	0.1202	2.50503	0.000294737	-2.47574	-1.87543	+		+	6797950	NA	603148	NA	4	0	2	1	5	1	0	0	0	0	0	65304000	52135000	67923000	45921000	0	5450600
P07150	Annexin A1	Anxa1	29	29	29	70.8	38.829	0	323.31	18800000000	286					UPS	0.5336	Intracellular	0.8688	0.0006	0.1306	1.34735	0.00881224	-1.23031	-0.955863	+		+	445425000	215172000	76296000	113692000	4	4	54	43	57	38	0	36	20	15	23	4250100000	3969200000	5758700000	2523700000	0	1022200000
Q07936	Annexin A2	Anxa2	35	35	35	80.2	38.678	0	323.31	49400000000	479					UPS	0.5304	Intracellular	0.9851	0.0002	0.0147	2.327	0.000818423	-1.87037	-1.52332	+		+	1263270000	384830000	85950600	175845000	4	4	88	84	81	86	0	44	42	21	33	11100000000	10800000000	11700000000	11400000000	3423900	1569800000
P14669;Q6TXF2	Annexin A3	Anxa3	13	13	13	48.1	36.363	0	43.308	445350000	49					UPS	0.5508	Intracellular	0.9469	0	0.0531	1.59954	0.00050047	-2.99478	-1.65429	+		+	11560900	3185800	14325900	NA	4	1	4	8	26	6	0	1	1	3	0	33458000	54571000	337600000	11475000	0	1781800
P14668;Q66HH8	Annexin A5;Annexin	Anxa5	21	21	21	78.4	35.744	0	323.31	7354200000	186					UPS	0.5502	Intracellular	0.9461	0	0.0539	1.25696	0.00671167	-1.35803	-0.989505	+		+	178282000	82675200	22769600	44433700	4	4	32	30	27	41	0	17	16	5	18	1723800000	1481400000	1518800000	1750000000	0	311550000
Q5U362;P55260	Annexin;Annexin A4	Anxa4	13	13	13	50.5	35.893	0	62.387	1375500000	56					Intracellular	0.9243	Intracellular	0.9806	0.0001	0.0193	0.33034	0.145988	-1.11294	-0.49803				26761200	33163000	4381050	5279610	4	3	12	6	8	10	0	5	6	3	6	322070000	325780000	331610000	186480000	0	95597000
Q6IMZ3;P48037	Annexin;Annexin A6	Anxa6	41	41	41	67.6	75.755	0	323.31	8572400000	310					Intracellular	0.5684	Intracellular	0.8807	0.0008	0.1185	0.814314	0.038962	-1.00321	-0.709529	+		+	194055000	117531000	17707700	61684200	4	4	53	44	49	44	0	42	31	9	38	2026600000	1795800000	2020900000	1524800000	0	478050000
F1M5Z5;A0A0G2K1M7	Anoctamin	Ano6	3	3	3	7.3	92.226	0	5.4679	78869000	8		+			Intracellular	0.5231	Intracellular	0.9854	0.003	0.0116	1.91356	0.00111019	-1.79731	-1.37456	+		+	2339430	NA	245827	NA	4	0	1	2	1	4	0	0	0	0	0	13320000	30684000	14610000	20254000	0	0
A0A0G2K2V2;G3V9N8;P52303	AP complex subunit beta;AP-1 complex subunit beta-1	Ap1b1	23	12	12	34.5	103.82	0	59.454	555460000	49					Intracellular	0.5205	Intracellular	0.8752	0	0.1247	2.59363	8.36e-05	-3.85312	-2.44388	+		+	15463200	3698600	2507030	NA	4	1	6	5	17	14	0	2	2	1	2	99304000	129980000	188410000	125120000	0	4341200
Q32Q06	AP-1 complex subunit mu-1	Ap1m1	4	4	4	15.1	48.556	0	6.9089	142910000	17					Intracellular	0.5431	Intracellular	0.7952	0.0028	0.2019	2.44496	0.000342857	-2.42882	-1.83315	+		+	3791620	1518600	1395760	NA	4	1	3	5	4	3	0	1	1	0	0	23762000	34496000	48787000	30354000	0	2014900
P18484;A0A0G2K943;Q66HM2	AP-2 complex subunit alpha-2	Ap2a2	27	27	21	45.3	104.04	0	126.24	1814600000	149					Transmembrane	0.4697	Transmembrane	0.2342	0.2961	0.4697	2.80074	9.29e-05	-4.06775	-2.63132	+		+	51147200	5429030	9003960	3972110	4	3	28	40	34	34	0	4	1	0	8	409720000	415700000	533930000	401490000	0	14752000
P62944	AP-2 complex subunit beta	Ap2b1	37	37	26	52.6	104.55	0	217.58	3016700000	166					Intracellular	0.5124	Intracellular	0.8743	0.0001	0.1256	2.80213	0.000219608	-3.09386	-2.26331	+		+	85040700	12144600	15863400	8741000	4	4	31	36	37	39	0	6	5	2	10	566010000	702130000	956640000	609130000	0	60840000
A0A140TAH5;P84092	AP-2 complex subunit mu	Ap2m1	10	10	10	29.5	49.526	0	44.496	775460000	43					Intracellular	0.5657	Intracellular	0.8083	0.0139	0.1777	2.18791	0.000154696	-4.36309	-2.33462	+		+	18866300	7476900	1903780	NA	4	1	13	13	8	8	0	0	0	0	1	190920000	195980000	179730000	198000000	0	3302600
P62744	AP-2 complex subunit sigma	Ap2s1	3	3	3	23.9	17.018	0	5.8425	176170000	14					UPS	0.5508	Intracellular	0.5217	0.0117	0.4666	2.46403	0.000191781	-2.89154	-2.03728	+		+	4964930	NA	1042200	NA	4	0	4	2	5	3	0	0	0	0	0	44014000	44835000	53277000	27714000	0	3321200
F1LRI7;P0C1X8	AP2-associated protein kinase 1	Aak1	3	3	3	6.7	103.86	0	6.9275	33450000	11					Transmembrane	0.4335	Transmembrane	0.395	0.1715	0.4335	0.771994	0.0549332	-0.904269	-0.655985				1190250	NA	256264	NA	3	0	2	2	3	4	0	0	0	0	0	8030200	8600100	4325600	12494000	0	0
P53676;Q6IRG9;V9GZ82;P53678	AP-3 complex subunit mu-1	Ap3m1	3	3	3	13.2	46.981	0	5.3298	140120000	13					UPS	0.5009	Intracellular	0.4994	0.0583	0.4423	2.12922	0.000289256	-2.78877	-1.8546	+		+	4241620	NA	1157800	NA	4	0	4	1	4	4	0	0	0	0	0	107200000	8566100	10910000	13439000	0	0
A0A0G2K7K2;Q9JM53	Apoptosis-inducing factor 1, mitochondrial	Aifm1	9	9	9	25.5	66.133	0	34.967	541980000	46		+			Transmembrane	0.4776	Transmembrane	0.3097	0.2127	0.4776	3.44456	0.000106061	-3.75859	-2.84535	+		+	15700900	2178200	4458270	NA	4	1	8	14	13	11	0	0	0	0	0	116760000	188510000	99235000	134960000	0	0
P29975;A0A0G2K3E0	Aquaporin-1	Aqp1	6	6	6	29.7	28.856	0	323.31	1581300000	39		+			Transmembrane	0.9442	Transmembrane	0.0066	0.0492	0.9442	0.242241	0.19629	-1.30979	-0.437352				50508700	41268000	34719400	364878	3	2	13	13	0	3	0	8	2	0	0	620310000	655340000	0	74523000	0	159970000
A0A0G2JYA2;Q9JHU5	Arfaptin-1	Arfip1	8	8	8	37	41.432	0	34.379	427770000	42					UPS	0.5072	Intracellular	0.9178	0	0.0822	3.66962	0	-4.0662	-3.09708	+		+	12636500	NA	210137	NA	4	0	6	12	10	14	0	0	0	0	0	104880000	105170000	111960000	105760000	0	0
P40329	Arginine--tRNA ligase, cytoplasmic	Rars	16	16	16	33.8	75.81	0	54.57	994190000	79					Intracellular	0.5683	Intracellular	0.9973	0	0.0026	1.96007	0.000830189	-2.1367	-1.53875	+		+	25131000	8607160	2044480	1930180	4	3	21	17	14	16	0	4	4	0	3	276960000	240760000	242560000	193310000	0	17293000
D4A2N1;A0A0G2JX45	Arginyl-tRNA--protein transferase 1	Ate1	4	4	4	13.9	58.216	0	8.3309	86776000	12					Intracellular	0.5185	Intracellular	0.934	0	0.066	1.22598	0.00261873	-1.78482	-1.13737	+		+	3267730	NA	1397080	NA	3	0	2	1	6	3	0	0	0	0	0	12961000	2652300	40869000	30294000	0	0
B0BN83	Armadillo repeat-containing protein 1	Armc1	4	4	4	42.6	31.204	0	13.992	60596000	12					Intracellular	0.5303	Intracellular	0.8993	0.0298	0.0708	0.876922	0.0369758	-0.977998	-0.717789	+		+	2063470	NA	539043	NA	3	0	4	3	0	5	0	0	0	0	0	14521000	14832000	10089000	21155000	0	0
B1WBW4	Armadillo repeat-containing protein 10	Armc10	4	4	4	20.3	33.421	0	19.392	63576000	12		+			Transmembrane	0.5447	Transmembrane	0.3964	0.059	0.5447	1.73432	0.00236446	-1.4438	-1.15485	+		+	1885800	NA	416732	NA	4	0	2	3	3	4	0	0	0	0	0	22143000	16988000	12855000	11589000	0	0
P49088	Asparagine synthetase [glutamine-hydrolyzing]	Asns	22	22	22	60.6	64.246	0	210.35	1746900000	94					UPS	0.5025	Intracellular	0.8808	0.0104	0.1088	1.35813	0.00101188	-2.64037	-1.43666	+		+	42671000	13723300	11909300	3564160	4	3	22	14	26	17	0	5	2	0	8	314320000	347450000	654440000	371500000	0	14462000
P13221	Aspartate aminotransferase, cytoplasmic	Got1	11	11	11	47.2	46.428	0	22.452	342780000	34					Intracellular	0.5448	Intracellular	0.9599	0.0008	0.0393	0.27515	0.248419	-0.738373	-0.386551				7016380	9121770	819510	1997670	4	3	3	5	11	7	0	1	2	0	5	55665000	70859000	69580000	79953000	0	24228000
P00507	Aspartate aminotransferase, mitochondrial	Got2	17	17	17	54.7	47.314	0	178.49	5421900000	157					Intracellular	0.5431	Intracellular	0.8152	0.0776	0.1072	1.91117	0.000198817	-4.12993	-2.09878	+		+	149520000	19098300	28889500	5285850	4	3	34	43	32	41	0	3	2	0	2	1401300000	1661400000	928150000	1320100000	0	41821000
P15178	Aspartate--tRNA ligase, cytoplasmic	Dars	18	18	18	47.3	57.126	0	80.49	1308700000	83					Intracellular	0.5688	Intracellular	0.9885	0	0.0115	2.75028	0	-5.41376	-2.9818	+		+	38297500	2765800	2356490	1053590	4	2	18	18	23	23	0	1	0	0	0	245820000	284950000	409730000	343220000	0	7552400
Q9ER24	Ataxin-10	Atxn10	5	5	5	20.2	53.726	0	106.98	138310000	17					Intracellular	0.5648	Intracellular	0.997	0.0008	0.0021	4.4955	8.85e-05	-2.6394	-2.54299	+		+	4055720	NA	438210	NA	4	0	6	3	3	5	0	0	0	0	0	28849000	26701000	47102000	35654000	0	0
A0A0G2JSS9;Q0ZHH6	Atlastin-3	Atl3	19	19	19	48.1	60.249	0	178.51	976560000	92		+			Intracellular	0.6611	Intracellular	0.893	0.0015	0.1055	4.60178	0	-5.32836	-4.22773	+		+	28581800	NA	3062590	NA	4	0	20	19	26	27	0	0	0	0	0	235690000	274490000	249580000	216800000	0	0
P19511	ATP synthase F(0) complex subunit B1, mitochondrial	Atp5f1	7	7	7	34.4	28.868	0	127.92	707900000	36					UPS	0.5577	Intracellular	0.8669	0.0526	0.0805	3.49177	0	-4.30055	-3.10657	+		+	21037800	NA	7849540	NA	4	0	10	11	6	9	0	0	0	0	0	251060000	221190000	91085000	144560000	0	0
P15999;F1LP05;A0A0G2K099	ATP synthase subunit alpha, mitochondrial;ATP synthase subunit alpha	Atp5a1	30	30	30	60.6	59.753	0	323.31	19700000000	287					Intracellular	0.5864	Intracellular	0.9101	0.0063	0.0836	6.59044	0	-9.21646	-7.90675	+		+	564863000	971554	132000000	95523	4	2	73	66	60	86	0	0	0	2	0	5243100000	5750900000	3780100000	4883400000	0	2602300
G3V6D3;P10719	ATP synthase subunit beta;ATP synthase subunit beta, mitochondrial	Atp5b	29	29	29	80	56.344	0	323.31	22200000000	620					Intracellular	0.5392	Intracellular	0.5732	0.2259	0.2009	5.073	0	-7.5049	-5.60931	+		+	570718000	4353230	135801000	732507	4	3	161	177	104	173	0	1	2	0	2	5488200000	6970000000	3974800000	5714500000	0	16833000
P31399	ATP synthase subunit d, mitochondrial	Atp5h	6	6	6	56.5	18.763	0	26.477	337340000	30					UPS	0.6368	Intracellular	0.9693	0.0029	0.0278	4.53478	0	-3.40971	-3.09254	+		+	9919920	NA	3270480	NA	4	0	11	8	3	8	0	0	0	0	0	136120000	73144000	47175000	80899000	0	0
G3V7Y3;P35434;B1WBP7	ATP synthase subunit delta, mitochondrial	Atp5d	3	3	3	53	17.563	0	154.31	359230000	27					UPS	0.5399	Intracellular	0.7016	0.0428	0.2556	3.14136	9.61e-05	-3.71979	-2.68207	+		+	10482200	NA	2000690	NA	4	0	6	8	5	8	0	0	0	0	0	85191000	120010000	76077000	77960000	0	0
P29419	ATP synthase subunit e, mitochondrial	Atp5i	3	3	3	50.7	8.2545	0.00042265	3.6886	267140000	8					Intracellular	0.9345	Intracellular	0.717	0.0069	0.276	3.96905	0	-3.54037	-2.96324	+		+	7780750	NA	1213490	NA	4	0	2	1	3	2	0	0	0	0	0	65956000	90439000	66818000	41786000	0	0
D3ZAF6	ATP synthase subunit f, mitochondrial	Atp5j2	3	3	3	23.9	10.452	0	5.8478	640740000	16		+			Transmembrane	0.6933	Transmembrane	0.2959	0.0108	0.6933	3.11947	0	-4.47704	-2.9588	+		+	19021300	NA	6377010	NA	4	0	6	6	2	2	0	0	0	0	0	199810000	201170000	117370000	122390000	0	0
Q6PDU7	ATP synthase subunit g, mitochondrial	Atp5l	5	5	5	58.3	11.433	0	36.964	658460000	30					UPS	0.6368	Intracellular	0.7571	0.0003	0.2426	5.53	0	-4.70471	-4.34873	+		+	19425300	NA	4489560	NA	4	0	8	10	5	7	0	0	0	0	0	180360000	205720000	152230000	120150000	0	0
P35435;Q6PCU0;Q6QI09	ATP synthase subunit gamma, mitochondrial;ATP synthase subunit gamma	Atp5c1;Taf3	9	9	9	42.9	30.19	0	65.121	1620000000	53					UPS	0.5994	Intracellular	0.8296	0.0001	0.1703	3.73183	0	-5.44568	-3.70598	+		+	47982700	NA	14104100	NA	4	0	11	15	12	15	0	0	0	0	0	469420000	585510000	266710000	296350000	0	0
Q06647	ATP synthase subunit O, mitochondrial	Atp5o	9	9	9	53.5	23.397	0	36.01	1852600000	41					UPS	0.5505	Intracellular	0.8603	0.0005	0.1392	4.89939	0	-6.06832	-4.79396	+		+	54555300	NA	15772200	NA	4	0	16	9	6	10	0	0	0	0	0	532570000	567510000	362560000	389980000	0	0
G3V9T7	ATPase Asna1	Asna1	7	7	7	35.1	38.822	0	59.878	194070000	20					UPS	0.5966	Intracellular	0.7561	0.0006	0.2433	2.33346	0.000294118	-2.61128	-1.87131	+		+	5272280	2113300	1106490	NA	4	1	4	2	5	6	0	1	2	0	0	45609000	35329000	56270000	55715000	0	0
Q3KRE0	ATPase family AAA domain-containing protein 3	Atad3	12	12	12	28.4	66.758	0	15.649	221920000	25		+			Intracellular	0.8798	Intracellular	0.9019	0.0003	0.0978	4.01531	8.24e-05	-2.64644	-2.42889	+		+	6562330	NA	1798360	NA	4	0	7	5	5	8	0	0	0	0	0	62650000	77389000	23130000	58753000	0	0
O70595;A0A0G2K4U1	ATP-binding cassette sub-family B member 6, mitochondrial	Abcb6	4	4	4	10.5	93.304	0	9.0429	40801000	8		+			Transmembrane	0.8819	Transmembrane	0.002	0.1161	0.8819	0.205054	0.545542	0.232359	0.18597				1210090	NA	412218	NA	4	0	2	3	0	3	0	0	0	0	0	7515700	7741800	11362000	14181000	0	0
Q6MG08	ATP-binding cassette sub-family F member 1	Abcf1	5	5	5	14.9	95.251	0	23.936	69829000	23					Intracellular	0.5857	Intracellular	0.9396	0	0.0603	2.48239	0.00127911	-1.42537	-1.29268	+		+	2070480	NA	413361	NA	4	0	4	7	5	7	0	0	0	0	0	13927000	28558000	11936000	15409000	0	0
G3V9G4;A0A0G2K5E7;G3V888;P16638	ATP-citrate synthase	Acly	12	12	12	18.4	119.71	0	28.723	250890000	38					UPS	0.5004	Intracellular	0.9444	0	0.0555	4.52597	0.000104283	-3.0204	-2.82555	+		+	7398050	NA	368633	NA	4	0	9	9	11	9	0	0	0	0	0	63645000	60952000	68315000	57980000	0	0
D3ZLK9;D4AAT7	ATP-dependent (S)-NAD(P)H-hydrate dehydratase	Carkd	3	3	3	12.9	38.73	0.0015773	2.8624	89013000	6		+			Transmembrane	0.5584	Transmembrane	0.1061	0.3355	0.5584	2.17257	0.00111111	-1.66975	-1.37744	+		+	2635070	NA	119264	NA	4	0	1	1	4	0	0	0	0	0	0	23937000	25459000	19929000	19688000	0	0
P30835	ATP-dependent 6-phosphofructokinase, liver type	Pfkl	10	10	8	21.7	85.338	0	68.692	222810000	25					Intracellular	0.5476	Intracellular	0.7994	0.0016	0.199	4.44311	0.000105263	-3.06987	-2.8357	+		+	6407020	NA	2440540	NA	4	0	5	3	11	6	0	0	0	0	0	43523000	41233000	103730000	34317000	0	0
Q641Y8	ATP-dependent RNA helicase DDX1	Ddx1	20	20	20	33.8	82.496	0	162.48	1196200000	99					UPS	0.5208	Intracellular	0.9693	0.0012	0.0295	4.06389	0	-4.76197	-3.63276	+		+	34306000	3077700	7350550	NA	4	1	21	34	20	23	0	1	0	0	0	283620000	310830000	311960000	281510000	0	6775700
Q5U216	ATP-dependent RNA helicase DDX39A	Ddx39a	10	4	4	41	49.109	0	19.24	54329000	11					Intracellular	0.5667	Intracellular	0.9702	0.001	0.0288	0.73166	0.0404172	-1.06305	-0.703543	+		+	2160800	NA	560819	NA	3	0	4	0	3	4	0	0	0	0	0	12889000	0	17483000	23956000	0	0
P41740	Atrial natriuretic peptide receptor 3	Npr3	13	13	13	36.1	59.727	0	98.419	1103400000	79	+	+			Signal-peptide	0.9249	Signal-peptide	0.0013	0.9249	0.0738	0.339253	0.337575	-0.411614	-0.312081				25019500	18682800	10237000	7825530	4	4	11	13	11	13	0	9	6	4	12	220980000	304460000	100230000	282300000	0	43782000
Q6P7P5	Basic leucine zipper and W2 domain-containing protein 1	Bzw1	4	4	4	11.7	48.043	0	16.635	218000000	13					UPS	0.509	Intracellular	0.8914	0.0004	0.1082	2.21661	0.000584644	-2.08127	-1.59776	+		+	5682350	2329600	1165450	439820	4	2	6	2	3	2	0	0	0	0	0	54729000	56848000	48806000	44553000	0	3994200
P26453	Basigin	Bsg	6	6	6	16.2	42.435	0	24.997	158340000	24	+	+			Signal-peptide	0.9295	Signal-peptide	0.0012	0.9295	0.0693	2.85394	0.000199525	-2.69515	-2.1014	+		+	4621580	NA	470843	NA	4	0	5	7	7	5	0	0	0	0	0	33879000	41464000	44921000	36850000	0	1227900
D3ZUM4	Beta-galactosidase	Glb1	13	13	13	28.7	73.227	0	56.054	1443700000	78	+			+	Signal-peptide	0.8907	Signal-peptide	0.0005	0.8907	0.1088	3.23985	0.00015491	-2.89532	-2.33903	+		+	40555000	5152750	18916600	1600780	4	4	21	12	13	21	0	2	2	2	5	391140000	359720000	194680000	455090000	0	19189000
F1LQQ8;P06760;Q7TPJ3	Beta-glucuronidase	Gusb	4	4	4	9.1	74.788	0	13.839	109570000	23	+			+	Signal-peptide	0.7309	Signal-peptide	0.0377	0.7309	0.2314	1.66674	0.00131007	-1.73827	-1.2748	+		+	3194600	NA	181630	NA	4	0	7	6	3	7	0	0	0	0	0	29070000	16651000	33252000	29287000	0	0
Q641X3	Beta-hexosaminidase subunit alpha	Hexa	15	15	15	41.7	60.537	0	53.099	563830000	54	+			+	Signal-peptide	0.8115	Signal-peptide	0.0002	0.8115	0.1882	3.48691	0.000156863	-2.77893	-2.3583	+		+	16150300	4824900	3137940	NA	4	1	10	12	14	13	0	0	0	4	1	117310000	127560000	146510000	151130000	0	1181800
F1LR87;Q6AXR4	Beta-hexosaminidase subunit beta	Hexb	10	10	10	37.4	61.5	0	38.83	611880000	49	+			+	Transmembrane	0.5079	Transmembrane	0.0336	0.4586	0.5079	1.95399	0.000196952	-3.9265	-2.08288	+		+	16413800	10012000	3047730	NA	4	1	16	11	8	14	0	0	0	0	0	139750000	119700000	134400000	201520000	0	0
O35567	Bifunctional purine biosynthesis protein PURH;Phosphoribosylaminoimidazolecarboxamide formyltransferase;IMP cyclohydrolase	Atic	29	29	29	68.4	64.208	0	290.64	2230100000	162					Intracellular	0.5678	Intracellular	0.8303	0.0813	0.0884	0.790821	0.00433405	-2.52773	-1.05984	+		+	53721700	28062300	3834570	4523880	4	3	40	29	32	38	0	8	6	0	9	510810000	502150000	495600000	560380000	0	43207000
P46844;Q6AZ33	Biliverdin reductase A	Blvra	7	7	7	38	33.565	0	16.596	104260000	14					UPS	0.5499	Intracellular	0.975	0.0031	0.0219	1.61709	0.00146027	-1.73507	-1.258	+		+	3037130	NA	263761	NA	4	0	1	2	7	4	0	0	0	0	0	16736000	5936200	47676000	33907000	0	0
P70645;A1A5L1;A0A096MJX0	Bleomycin hydrolase	Blmh;LOC100911400	5	5	5	18.5	52.322	0	16.026	214980000	23					UPS	0.5237	Intracellular	0.9532	0	0.0468	1.09627	0.00440201	-1.69444	-1.05531	+		+	5395400	4182750	1170930	1006280	4	2	0	8	4	6	0	1	1	0	3	19193000	57194000	68207000	41137000	0	5246900
Q99JD5;P54690	Branched-chain-amino-acid aminotransferase;Branched-chain-amino-acid aminotransferase, cytosolic	Bcat1	4	4	4	26.1	44.77	0	23.8	163290000	24					UPS	0.5238	Intracellular	0.9973	0.0002	0.0025	2.11284	0.000369291	-2.46744	-1.7281	+		+	4582520	NA	521235	NA	4	0	9	6	5	4	0	0	0	0	0	42034000	42470000	37838000	40953000	0	0
G3V8U8;O35854	Branched-chain-amino-acid aminotransferase;Branched-chain-amino-acid aminotransferase, mitochondrial	Bcat2	12	12	12	39.2	44.229	0	25.721	964300000	30					Intracellular	0.5448	Intracellular	0.8177	0.0245	0.1579	3.99907	0	-4.91574	-3.66451	+		+	29002700	NA	11875100	NA	4	0	10	8	5	7	0	0	0	0	0	304130000	334990000	82128000	243050000	0	0
Q5XIJ6	BRISC and BRCA1-A complex member 1	Babam1	2	2	2	16.5	36.878	0	7.9536	44627000	6					UPS	0.5981	Intracellular	0.8707	0.0002	0.1291	0.276521	0.339737	-0.464415	-0.310579				1619870	NA	239495	NA	3	0	1	2	0	3	0	0	0	0	0	9774300	14228000	4846700	15778000	0	0
P27653;G3V6S5;D3ZZM8	C-1-tetrahydrofolate synthase, cytoplasmic;Methylenetetrahydrofolate dehydrogenase;Methenyltetrahydrofolate cyclohydrolase;Formyltetrahydrofolate synthetase;C-1-tetrahydrofolate synthase, cytoplasmic, N-terminally processed	Mthfd1	11	11	11	17.5	100.99	0	29.052	366640000	23					Intracellular	0.5167	Intracellular	0.9522	0	0.0478	3.70586	0.000100901	-3.40643	-2.78468	+		+	10856800	NA	1491710	NA	4	0	5	5	4	9	0	0	0	0	0	92803000	95006000	82364000	95687000	0	0
P15791;P11275;F1LZG4;A0A0G2JUV8	Calcium/calmodulin-dependent protein kinase type II subunit delta	Camk2d	12	12	6	31.3	60.08	0	85.628	1008800000	65					Intracellular	0.5396	Intracellular	0.9088	0	0.0912	3.6038	0	-5.83983	-3.75042	+		+	29170700	1751900	6709960	NA	4	1	17	22	9	14	0	2	1	0	0	285750000	347980000	163420000	192740000	0	8443200
P11730;F1M3F8	Calcium/calmodulin-dependent protein kinase type II subunit gamma	Camk2g	9	4	3	28.7	59.037	0	26.644	116230000	8					Intracellular	0.5455	Intracellular	0.8704	0	0.1296	0.727057	0.0265608	-1.27488	-0.769329	+		+	4432230	NA	1833390	NA	3	0	3	3	1	1	0	0	0	0	0	64968000	29622000	6717200	14925000	0	0
Q6AYK6	Calcyclin-binding protein	Cacybp	5	5	5	22.7	26.541	0	224.4	274770000	23					UPS	0.6113	Intracellular	0.8705	0	0.1295	2.13104	0.000577169	-2.09401	-1.57693	+		+	7386900	3315700	2083540	NA	4	1	4	6	4	5	0	2	0	0	2	64681000	50983000	89095000	57431000	0	6584500
P35565	Calnexin	Canx	18	18	18	41.8	67.254	0	204.87	2094800000	80	+	+			Signal-peptide	0.9998	Signal-peptide	0	0.9998	0.0002	4.36333	0	-6.40603	-4.54695	+		+	60013000	NA	2520540	NA	4	0	20	22	21	17	0	0	0	0	0	492610000	553100000	602400000	446660000	0	0
Q64537;M0RD20;A0A0G2K6H7	Calpain small subunit 1	Capns1	11	11	11	75.9	28.57	0	202.76	859710000	62					Transmembrane	0.5193	Transmembrane	0.3241	0.1567	0.5193	4.05965	0	-4.79053	-3.64357	+		+	22864700	NA	5238170	NA	4	0	15	20	17	10	0	0	0	0	0	209910000	215060000	302540000	118510000	0	9422000
P97571;F1LS29	Calpain-1 catalytic subunit	Capn1	8	8	8	21.2	82.118	0	45.895	133960000	41					Intracellular	0.5486	Intracellular	0.806	0.0001	0.1939	1.80833	0.00086747	-2.09584	-1.46883	+		+	3295550	2574600	458923	NA	4	1	11	16	7	7	0	0	0	0	0	31451000	40091000	44022000	13880000	0	1155800
Q07009	Calpain-2 catalytic subunit	Capn2	26	26	26	53.7	79.918	0	242.77	1784400000	108					Intracellular	0.5475	Intracellular	0.9386	0	0.0614	1.99422	0.00020438	-4.07264	-2.14142	+		+	49341300	6359500	9582100	2341150	4	3	22	22	33	23	0	4	2	0	2	386180000	400130000	608070000	347150000	0	20405000
A0A0G2JSY2;F1LPH1;D3ZL24;P27321;D4A129;O55154	Calpastatin	Cast	9	9	9	26.4	73.155	0	77.143	232000000	25					Intracellular	0.765	Intracellular	0.7988	0.0019	0.1994	4.10943	8.54e-05	-2.67929	-2.47589	+		+	6535880	NA	74852.3	NA	4	0	3	6	10	5	0	1	0	0	0	44912000	57302000	80830000	44385000	0	4566100
D3ZRX9	Calponin	Cnn2	13	12	12	81.3	24.069	0	268.83	4512600000	96					Intracellular	0.5685	Intracellular	0.9516	0.006	0.0424	1.77918	0.000200238	-4.67261	-2.10428	+		+	120190000	13058800	25890300	5817020	4	3	18	26	29	17	0	3	0	2	1	933610000	899410000	1641400000	921310000	0	39161000
Q08290	Calponin-1	Cnn1	13	13	13	55.2	33.343	0	69.88	4070000000	74					UPS	0.5403	Intracellular	0.9111	0.0001	0.0888	2.12985	9e-05	-5.86546	-2.57303	+		+	106953000	8069650	75104100	6917420	4	2	17	16	27	14	0	0	0	0	0	787600000	986160000	1823200000	436270000	0	32191000
P37397	Calponin-3	Cnn3	17	17	16	66.1	36.434	0	133.71	4434100000	107					Intracellular	0.5987	Intracellular	0.9435	0.0012	0.0554	2.0047	0.000151351	-4.93712	-2.31963	+		+	122185000	9942300	20215000	1488780	4	3	30	24	21	26	0	4	1	0	1	979870000	1139100000	1289400000	944430000	0	25354000
P18418;D3ZYM6;F1M5A1	Calreticulin	Calr	21	21	21	69.2	47.995	0	323.31	17200000000	302	+		+		Signal-peptide	0.9839	Signal-peptide	0.0018	0.9839	0.0143	3.10366	0.000157303	-3.05288	-2.36725	+		+	446660000	60921300	58112500	27757800	4	4	48	65	82	63	0	15	14	2	13	3405300000	4450100000	5390800000	3333200000	0	201330000
P68182	cAMP-dependent protein kinase catalytic subunit beta	Prkacb	7	7	2	27.6	40.707	0	15.964	189680000	32					Intracellular	0.5122	Intracellular	0.8468	0.0005	0.1527	4.34955	9.17e-05	-2.77236	-2.60325	+		+	5584370	NA	579798	NA	4	0	9	8	7	8	0	0	0	0	0	45081000	57181000	42244000	45174000	0	0
P09456;F1M9X5;P81377	cAMP-dependent protein kinase type I-alpha regulatory subunit;cAMP-dependent protein kinase type I-alpha regulatory subunit, N-terminally processed	Prkar1a	8	8	8	32.3	43.094	0	87.166	531720000	49					Intracellular	0.9328	Intracellular	0.9597	0	0.0403	2.41044	0.000198582	-3.11267	-2.09761	+		+	14210000	2627670	1192510	55579.3	4	3	11	8	7	12	0	3	4	0	4	123700000	132310000	132280000	125460000	4865100	3164500
P12368;A0A0G2K405	cAMP-dependent protein kinase type II-alpha regulatory subunit	Prkar2a	6	6	6	24.9	45.48	0	20.854	249990000	24					Intracellular	0.5658	Intracellular	0.9974	0.0002	0.0025	3.70542	8.28e-05	-2.7955	-2.43632	+		+	7064800	NA	1499290	NA	4	0	6	6	3	9	0	0	0	0	0	57552000	71352000	48760000	72330000	0	0
A0A0G2K8H0;Q5M9G3	Caprin-1	Caprin1	5	5	5	14.4	79.632	0	20.199	213490000	14					Intracellular	0.8087	Intracellular	0.6951	0.0218	0.2831	4.35857	0.000158865	-2.46394	-2.38146	+		+	6231050	NA	1062460	NA	4	0	3	4	5	2	0	0	0	0	0	46257000	67818000	65590000	33821000	0	0
P14141	Carbonic anhydrase 3	Ca3	17	17	17	66.5	29.431	0	106.71	2958500000	41					UPS	0.619	Intracellular	0.7454	0.0007	0.2539	0.211427	0.240488	-1.22229	-0.393982				108203000	2838800	186418000	NA	3	1	0	0	35	0	0	0	0	6	0	0	4444500	2886900000	10204000	0	631570
P47727;M0R3X6;A0A0G2JSV2;A0A0G2K658;A0A096MJ24	Carbonyl reductase [NADPH] 1	Cbr1	11	11	11	56	30.578	0	56.877	781310000	43					UPS	0.5363	Intracellular	0.9814	0	0.0186	0.791047	0.00679129	-2.07983	-0.988583	+		+	18638500	10825300	2095070	564652	4	3	8	9	5	14	0	4	1	0	2	171470000	171980000	231470000	135580000	0	35224000
Q6IRK9	Carboxypeptidase Q	Cpq	16	16	16	60.6	52.041	0	151.56	3809100000	172	+			+	Signal-peptide	0.9106	Signal-peptide	0.0002	0.9106	0.0892	2.0718	0.010575	-0.981084	-0.929994	+		+	87031800	44612800	17886600	12182000	4	4	27	33	21	34	0	12	14	19	12	844650000	883220000	700250000	938960000	0	56524000
P18886;G3V7N5	Carnitine O-palmitoyltransferase 2, mitochondrial	Cpt2	7	7	7	20.5	74.109	0	66.078	107810000	29					Intracellular	0.5664	Intracellular	0.9201	0.0131	0.0668	2.75967	0.000337349	-2.15838	-1.79389	+		+	3225180	NA	864167	NA	4	0	9	8	6	6	0	0	0	0	0	28637000	26598000	19293000	33286000	0	0
P19139	Casein kinase II subunit alpha	Csnk2a1	4	4	4	18.7	45.073	0	15.347	253200000	28					Intracellular	0.7003	Intracellular	0.8657	0.0001	0.1343	3.37286	8.4e-05	-3.00852	-2.44626	+		+	7218250	NA	1845030	NA	4	0	5	7	7	9	0	0	0	0	0	42703000	61379000	91523000	56635000	0	0
P04762	Catalase	Cat	9	9	9	25.6	59.756	0	20.141	238300000	29					Intracellular	0.568	Intracellular	0.9392	0.0002	0.0606	2.36313	0.00034391	-2.50615	-1.83829	+		+	7212000	NA	2490590	NA	4	0	8	9	1	11	0	0	0	0	0	64981000	71530000	18775000	83014000	0	0
P22734	Catechol O-methyltransferase	Comt	3	3	3	27.7	29.597	0	11.583	73060000	19		+			Transmembrane	0.7262	Transmembrane	0.0001	0.2738	0.7262	1.48232	0.00989387	-1.13954	-0.939313	+		+	2186400	NA	689130	NA	4	0	7	6	3	3	0	0	0	0	0	25642000	21590000	9724700	16104000	0	0
A0A0G2JT93;Q9WU82	Catenin beta-1	Ctnnb1	16	16	16	37.1	85.47	0	95.922	770680000	70					Intracellular	0.7368	Intracellular	0.8635	0.0001	0.1364	3.49698	0	-4.44445	-3.16878	+		+	22150300	1817050	4520510	700530	4	2	11	17	16	22	0	2	1	0	1	149390000	191600000	237120000	177600000	0	2902200
Q6IN22;P00787	Cathepsin B;Cathepsin B light chain;Cathepsin B heavy chain	Ctsb	18	18	18	68.7	37.544	0	188.56	1743800000	97	+			+	Signal-peptide	0.9206	Signal-peptide	0.0634	0.9206	0.016	0.20633	0.531714	-0.247327	-0.193856				41768000	37174000	16016500	19107100	4	4	15	8	15	13	0	7	6	21	12	242810000	313820000	250510000	376610000	0	57779000
Q6P6T6;P24268	Cathepsin D;Cathepsin D 12 kDa light chain;Cathepsin D 9 kDa light chain;Cathepsin D 34 kDa heavy chain;Cathepsin D 30 kDa heavy chain	Ctsd	13	13	13	45.5	44.622	0	55.34	2089800000	66	+			+	Signal-peptide	0.99	Signal-peptide	0.0035	0.99	0.0065	2.79902	0.000191126	-2.59733	-2.03451	+		+	54551800	7723370	41039700	1662650	4	4	16	20	7	23	0	0	0	0	0	524670000	524760000	392770000	588940000	0	13726000
Q6AY20	Cation-dependent mannose-6-phosphate receptor	M6pr	2	2	2	16.2	31.095	0	18.18	78645000	15	+	+			Signal-peptide	0.9999	Signal-peptide	0	0.9999	0	2.86107	0.00101103	-1.54278	-1.43468	+		+	2299500	NA	339511	NA	4	0	4	4	5	2	0	0	0	0	0	12231000	26679000	23622000	16113000	0	0
Q2IBC6;P41350;P51638	Caveolin;Caveolin-1	Cav1	6	6	6	35.4	20.551	0	49.54	2094600000	42		+			UPS	0.6367	Intracellular	0.8996	0	0.1003	2.23402	0.000160458	-4.48436	-2.3934	+		+	59157200	11115000	37435300	NA	4	1	15	8	12	5	0	1	1	0	0	721280000	821100000	421150000	101290000	0	16299000
O70509;D3ZGF1;F1LSA1;P26051	CD44 antigen	Cd44	2	2	2	6.9	39.725	0	6.8839	270680000	14	+	+			Signal-peptide	0.8489	Signal-peptide	0.0194	0.8489	0.1317	4.56914	0	-3.49883	-3.16282	+		+	7194870	NA	1534610	NA	4	0	2	3	4	1	0	2	2	0	0	63848000	67581000	78696000	36418000	0	5197600
P40241	CD9 antigen	Cd9	2	2	2	15.5	25.215	0	5.6357	178540000	14		+			Transmembrane	0.9956	Transmembrane	0	0.0044	0.9956	1.66841	0.000845415	-2.31142	-1.49253	+		+	4444550	NA	859801	NA	4	0	5	4	1	4	0	0	0	0	0	53412000	45156000	41292000	32292000	0	2072000
B0K020	CDGSH iron-sulfur domain-containing protein 1	Cisd1	3	3	3	30.6	12.097	0	11.103	206170000	8		+			Transmembrane	0.4752	Transmembrane	0.4674	0.0573	0.4752	3.69071	0.000208696	-2.39262	-2.17674	+		+	6141600	NA	622522	NA	4	0	3	2	2	1	0	0	0	0	0	61765000	74422000	29310000	40678000	0	0
Q642E3;Q9JLH7	CDK5 regulatory subunit-associated protein 3	Cdk5rap3	3	3	3	15.3	57.134	0	38.23	35286000	6					Intracellular	0.5244	Intracellular	0.9448	0.0002	0.0551	0.278301	0.541543	-0.209537	-0.188429				1350670	NA	310907	NA	3	0	2	4	0	0	0	0	0	0	0	9038000	13155000	13094000	0	0	0
P70500	CDP-diacylglycerol--inositol 3-phosphatidyltransferase	Cdipt	3	3	3	19.2	23.613	0	5.4746	68864000	7		+			Transmembrane	0.949	Transmembrane	0.0465	0.0044	0.949	0.92769	0.0818626	-0.709639	-0.596709				2062800	NA	713903	NA	4	0	2	0	2	3	0	0	0	0	0	23502000	19170000	9478400	16714000	0	0
Q8CFN2;A0A0G2JSM8;A0A0U1RS21;Q5RJS2;Q9JJL4	Cell division control protein 42 homolog	Cdc42	11	11	10	84.8	21.258	0	45.416	1999300000	64					UPS	0.6154	Intracellular	0.8396	0.0017	0.1587	3.31328	0	-4.84057	-3.20705	+		+	57804800	3362670	3409360	1190380	4	3	21	13	13	9	0	3	1	1	3	423880000	522590000	569930000	453250000	0	10473000
P62634	Cellular nucleic acid-binding protein	Cnbp	4	4	4	32.2	19.463	0	16.868	233780000	22					Intracellular	0.9345	Intracellular	0.9011	0.0001	0.0988	2.27989	0.000297556	-2.71088	-1.88975	+		+	6219030	3102900	1124970	NA	4	1	4	5	4	5	0	2	0	0	2	38128000	54382000	68938000	64720000	0	1277900
Q4V8C2	Centromere/kinetochore protein zw10 homolog	Zw10	6	6	6	15.2	87.966	0	35.282	125680000	18					UPS	0.5001	Intracellular	0.9932	0.0001	0.0067	2.76201	0.000210263	-2.96459	-2.1908	+		+	3664850	NA	688130	NA	4	0	4	2	7	5	0	0	0	0	0	22975000	21217000	45078000	35766000	0	0
Q7TP14;A0A0G2JSR1;A0JPQ9	Chitinase domain-containing protein 1	Chid1	5	5	5	18.1	62.864	0	6.9001	102290000	10	+			+	Signal-peptide	0.8987	Signal-peptide	0.0026	0.8987	0.0987	2.60286	0.000340771	-2.28399	-1.815	+		+	2961300	NA	699462	NA	4	0	0	3	5	2	0	0	0	0	0	22183000	18531000	43157000	18416000	0	0
Q6MG61;A0A0G2K6C0	Chloride intracellular channel protein 1	Clic1	13	13	13	73.4	26.98	0	126.4	1158200000	66		+			UPS	0.6154	Intracellular	0.3937	0.2183	0.3879	0.851855	0.00948548	-1.71027	-0.94599	+		+	27859200	16829700	5286430	923425	4	3	10	11	13	9	0	11	5	0	7	187260000	267680000	356650000	223030000	0	43614000
G3V8C4;Q9Z0W7;F1M9X4;A0A0G2JTB6;Q811Q2	Chloride intracellular channel protein;Chloride intracellular channel protein 4	Clic4	12	12	12	73.1	28.669	0	149.16	1585600000	79		+			Transmembrane	0.6119	Transmembrane	0.2463	0.1418	0.6119	1.22575	0.0142857	-1.133	-0.879385	+		+	36532000	17939400	11795500	8421730	4	4	6	13	21	9	0	10	8	4	8	282340000	235520000	552910000	326870000	0	76867000
A0A0G2K7R8;A0A0G2K0P8;Q8VII6	Choline transporter-like protein 1	Slc44a1	2	2	2	4.1	73.114	0.00043687	4.1159	34722000	10		+			Transmembrane	0.9407	Transmembrane	0.0002	0.0591	0.9407	0.267649	0.47442	-0.273453	-0.223978				940705	NA	207055	NA	4	0	1	2	4	2	0	1	0	0	0	6639300	7363000	8570400	9232700	0	2917000
B4F795	Choline transporter-like protein 2	Slc44a2	5	5	5	9.4	79.896	0	7.4181	132970000	10		+			Transmembrane	0.9551	Transmembrane	0.0001	0.0449	0.9551	3.65865	0.00021374	-2.47384	-2.22172	+		+	3803120	NA	352367	NA	4	0	2	5	0	3	0	0	0	0	0	32188000	48916000	28500000	20938000	0	2430100
Q00657	Chondroitin sulfate proteoglycan 4	Cspg4	43	43	1	31.6	251.91	0	323.31	2119400000	189	+	+			Signal-peptide	0.909	Signal-peptide	0.0027	0.909	0.0883	0.355163	0.0963603	-1.47444	-0.569467				46531500	57952600	26964100	39478700	4	3	46	49	5	23	0	36	25	1	4	604400000	734500000	110660000	175500000	0	214330000
G3V936;Q8VHF5	Citrate synthase;Citrate synthase, mitochondrial	Cs	12	12	12	37.3	51.83	0	323.31	3670000000	115					UPS	0.5014	Intracellular	0.8749	0.0325	0.0926	4.89339	0	-7.13232	-5.28789	+		+	103462000	NA	26473300	NA	4	0	25	32	23	35	0	0	0	0	0	886500000	1186600000	693810000	896190000	0	4383200
F1M779;P11442	Clathrin heavy chain;Clathrin heavy chain 1	Cltc	94	94	94	66.6	191.56	0	323.31	20200000000	742					Intracellular	0.7158	Intracellular	0.976	0	0.0239	1.9258	0.000341463	-3.00454	-1.82879	+		+	529552000	91502700	43339100	54339500	4	4	157	153	164	158	0	37	30	5	38	4444500000	4765700000	6065300000	4143400000	0	254480000
Q4KM65	Cleavage and polyadenylation specificity factor subunit 5	Nudt21	4	4	4	33.9	26.24	0	41.398	175550000	21					UPS	0.5711	Intracellular	0.9845	0	0.0155	3.32839	0.000199288	-2.42182	-2.10114	+		+	5161300	NA	1304430	NA	4	0	4	5	4	7	0	1	0	0	0	40855000	48698000	41143000	43677000	0	1176800
G3V6T1	Coatomer subunit alpha	Copa	43	43	43	52.6	138.36	0	242.82	4172600000	179					Intracellular	0.5457	Intracellular	0.8707	0.0001	0.1292	2.26969	0.000156643	-4.23304	-2.35722	+		+	118015000	13391200	27609000	8096570	4	3	39	37	47	43	0	6	2	0	5	857140000	906540000	1319100000	990500000	0	13879000
O35142	Coatomer subunit beta	Copb2	31	31	17	53.9	102.55	0	169.97	2424700000	139					UPS	0.5203	Intracellular	0.8983	0.0002	0.1014	1.71583	0.000377358	-3.19352	-1.76791	+		+	64781300	14189300	7335850	1951030	4	3	23	35	39	23	0	7	6	0	6	527550000	570770000	777120000	461380000	976250	28184000
P23514	Coatomer subunit beta	Copb1	31	31	31	50.5	107.01	0	169.19	2700600000	176					Transmembrane	0.5927	Transmembrane	0.3695	0.0377	0.5927	4.34578	0	-4.50595	-3.6595	+		+	77190500	4420900	10318200	2549280	4	3	40	40	45	43	0	2	3	0	3	581010000	630800000	855170000	577200000	0	13719000
Q66H80	Coatomer subunit delta	Arcn1	19	19	19	43.2	57.199	0	90.093	1567500000	69					Intracellular	0.5661	Intracellular	0.4792	0.1348	0.3861	2.12091	0.000153005	-4.53663	-2.32696	+		+	42888000	7391100	17912300	6287450	4	2	15	16	20	15	0	1	0	0	2	294230000	336570000	476710000	430310000	0	4881200
Q4AEF8;A0A0G2K1F3	Coatomer subunit gamma-1	Copg1	30	30	28	53.8	97.613	0	207.39	2925300000	167					Intracellular	0.5031	Intracellular	0.9599	0.001	0.0391	1.27352	0.000646793	-3.5337	-1.55521	+		+	78065500	18641000	12731700	3820280	4	3	27	32	49	39	0	4	3	0	13	637070000	587610000	861100000	730710000	0	31768000
A0A0H2UHV9;D4ABY2	Coatomer subunit gamma-2	Copg2	7	5	5	10.9	97.569	0	13.381	66244000	18					Intracellular	0.5614	Intracellular	0.8479	0.0282	0.1239	2.04743	0.00181456	-1.42127	-1.21063	+		+	1958450	NA	508390	NA	4	0	4	5	5	4	0	0	0	0	0	13352000	18259000	16733000	17900000	0	0
P45592;A0A0G2KA35	Cofilin-1	Cfl1	12	12	9	69.3	18.532	0	323.31	11000000000	135					UPS	0.6162	Intracellular	0.98	0	0.02	1.31782	0.00456	-1.44385	-1.04379	+		+	271218000	113400000	87913500	55950600	4	4	18	18	27	27	0	16	13	4	12	1928500000	2047600000	3879600000	1969600000	0	439400000
P86182	Coiled-coil domain-containing protein 22	Ccdc22	5	5	5	13.6	70.854	0	8.2745	69900000	14					Intracellular	0.8797	Intracellular	0.8889	0.0122	0.0989	2.20457	0.0011176	-1.67638	-1.38856	+		+	2106720	NA	647883	NA	4	0	2	3	5	4	0	0	0	0	0	9409900	11586000	14084000	34819000	0	0
Q6P9U3	COMM domain-containing protein 3	Commd3	2	2	2	22.1	21.932	0	7.0529	56698000	11					UPS	0.5972	Intracellular	0.7127	0.0869	0.2003	1.16759	0.00759972	-1.38545	-0.973313	+		+	1667600	NA	350473	NA	4	0	3	4	1	3	0	0	0	0	0	15592000	10222000	14777000	15655000	0	0
O35796	Complement component 1 Q subcomponent-binding protein, mitochondrial	C1qbp	8	8	8	61.3	30.997	0	271.74	1535500000	57					UPS	0.6179	Intracellular	0.9094	0.0152	0.0754	3.23769	0	-5.03544	-3.22337	+		+	45245700	3799000	19386400	NA	4	1	9	15	14	19	0	0	0	0	0	441920000	418980000	255110000	414040000	0	0
A0A0G2K7Y0;Q63135	Complement component receptor 1-like protein	Cr1l	2	2	2	5.1	68.662	0.0004363	4.0953	80721000	7	+	+			Transmembrane	0.665	Transmembrane	0.0104	0.3246	0.665	2.35003	0.000302703	-2.67832	-1.90516	+		+	2838970	NA	255719	NA	3	0	1	3	2	1	0	0	0	0	0	25436000	23895000	24299000	7090300	0	0
A0A0G2JT06;A0A0G2JW80;P97834	COP9 signalosome complex subunit 1	Gps1	3	3	3	10.3	58.876	0	31.373	85990000	12					Intracellular	0.5691	Intracellular	0.8744	0.1227	0.0029	1.83756	0.00267364	-1.35609	-1.13091	+		+	2559120	NA	559944	NA	4	0	3	3	2	4	0	0	0	0	0	20339000	22247000	18205000	25198000	0	0
P61203	COP9 signalosome complex subunit 2	Cops2	5	5	5	23.7	51.596	0	15.624	165980000	28					UPS	0.5017	Intracellular	0.8912	0	0.1088	2.41472	0.00037182	-2.25669	-1.74286	+		+	4807500	NA	912701	NA	4	0	3	5	11	9	0	0	0	0	0	37598000	49221000	47050000	30144000	0	1964400
Q68FW9	COP9 signalosome complex subunit 3	Cops3	3	3	3	13.5	47.859	0	13.758	198580000	16					Intracellular	0.5045	Intracellular	0.4478	0.1376	0.4145	1.46998	0.00107809	-2.29206	-1.3997	+		+	5192350	2797350	825980	737724	4	2	2	3	2	4	0	1	3	0	1	38355000	49188000	40539000	48464000	0	7065900
Q68FS2	COP9 signalosome complex subunit 4	Cops4	9	9	9	34.5	46.289	0	29.638	238670000	25					Intracellular	0.5817	Intracellular	0.8869	0.0003	0.1128	0.962217	0.0136795	-1.35159	-0.889928	+		+	5557350	5130400	319064	208172	4	2	4	5	6	7	0	1	0	0	2	34967000	67616000	50596000	66376000	0	9732800
Q6P4Z9	COP9 signalosome complex subunit 8	Cops8	6	6	6	65.6	23.235	0	29.773	152800000	21					UPS	0.5594	Intracellular	0.979	0.001	0.02	4.34644	8.75e-05	-2.66866	-2.52864	+		+	4560700	NA	793775	NA	4	0	5	4	7	3	0	1	1	0	0	53806000	54793000	18179000	26026000	0	0
A0A140TAB4;Q02874	Core histone macro-H2A.1	H2afy	5	5	4	20.9	39.07	0	9.5224	186490000	19					UPS	0.6138	Intracellular	0.814	0.0391	0.1468	3.11843	0.000292887	-2.12504	-1.8663	+		+	4927950	NA	987841	NA	4	0	7	7	3	2	0	0	0	0	0	66781000	53864000	39236000	26613000	0	0
G3V624	Coronin	Coro1c	14	14	14	43	53.177	0	323.31	1681300000	93					Intracellular	0.5431	Intracellular	0.7673	0.0225	0.2102	1.46743	0.00103529	-2.31455	-1.4052	+		+	42721500	11954800	4620720	7330020	4	4	15	17	19	20	0	6	8	2	6	351370000	391390000	434710000	408570000	0	31476000
G3V940;O89046	Coronin;Coronin-1B	Coro1b	10	10	10	36.4	53.938	0	106.43	949130000	51					Intracellular	0.5465	Intracellular	0.8203	0.0029	0.1768	1.64574	0.000336336	-3.45227	-1.78585	+		+	25436500	8755000	5534480	2182130	4	2	9	11	14	10	0	1	2	0	4	220710000	213320000	242060000	232650000	0	4080800
O35828;A0A0A0MXU2;A0A0G2K9F9;D3ZUQ3	Coronin-7;Coronin	Coro7	5	5	5	12.7	100.78	0	24.715	56301000	15					Intracellular	0.5504	Intracellular	0.9847	0.0001	0.0153	2.38001	0.00338958	-1.15973	-1.09557	+		+	1991500	NA	269226	NA	3	0	3	2	4	6	0	0	0	0	0	5027200	10369000	21781000	19123000	0	0
P07335	Creatine kinase B-type	Ckb	15	15	15	61.4	42.725	0	323.31	1952100000	123					Intracellular	0.5576	Intracellular	0.9352	0.0013	0.0635	0.480738	0.0463518	-1.53381	-0.681984	+		+	42288300	35369000	24014500	16649100	4	3	33	25	11	11	0	21	18	0	4	707740000	601540000	214100000	168880000	0	125830000
F7FG31;A0A0H2UI20;Q9Z2F5	C-terminal-binding protein 1	Ctbp1	2	2	2	13.2	43.847	0	49.055	59794000	15					Intracellular	0.7303	Intracellular	0.9532	0.0001	0.0467	0.755352	0.0214466	-1.36928	-0.809288	+		+	2091800	NA	704863	NA	3	0	5	4	2	4	0	0	0	0	0	18858000	11257000	6660300	20955000	0	0
B1WC02	CTP synthase	Ctps1	13	13	13	37.7	66.64	0	323.31	595020000	62					Intracellular	0.6437	Intracellular	0.896	0.0026	0.1014	3.32887	0.00011245	-4.06578	-2.92109	+		+	16964300	2070400	9202100	NA	4	1	16	11	23	12	0	0	0	0	0	111030000	130580000	221190000	129630000	0	0
F1LMA7;Q4TU93	C-type mannose receptor 2	Mrc2	30	30	30	34.1	170.63	0	174.06	1954800000	155	+	+			Signal-peptide	0.799	Signal-peptide	0.1398	0.799	0.0612	2.05196	0.00110652	-1.71388	-1.37117	+		+	48115300	16321100	9849850	8828070	4	4	32	32	36	31	0	11	8	3	2	442360000	516200000	567680000	289680000	1650500	44104000
A0A0G2JSP3;B5DF89	Cullin-3	Cul3	4	4	4	9.4	86.467	0	9.0562	95361000	12					Intracellular	0.5697	Intracellular	0.9998	0	0.0002	0.981096	0.00970207	-1.48189	-0.940803	+		+	2605650	1525500	588782	NA	4	1	3	2	3	4	0	0	0	0	0	24191000	24419000	18434000	25756000	0	0
D3ZEF4;A0A0H2UHP4;A0A0G2K959	Cullin-7	Cul7	4	4	4	4.1	192.66	0	6.853	79499000	9					Intracellular	0.8794	Intracellular	0.995	0.0002	0.0048	1.53917	0.0045535	-1.31353	-1.04275	+		+	2334300	NA	349677	NA	4	0	1	4	2	2	0	0	0	0	0	16600000	26457000	21093000	15350000	0	0
P97536	Cullin-associated NEDD8-dissociated protein 1	Cand1	32	32	32	42.4	136.36	0	178.08	2632400000	189					Intracellular	0.5834	Intracellular	0.9578	0	0.0422	1.89604	0.000249166	-3.57918	-1.96622	+		+	73733000	9588850	2443910	6004550	4	4	40	41	39	42	0	7	9	0	11	567300000	659330000	736820000	559420000	0	30513000
Q9EQS4;A0A0G2K3C5;P18757;A0A0G2K5G2	Cystathionine gamma-lyase	Cth	8	8	8	39.4	43.58	0	28.993	321240000	28					UPS	0.5007	Intracellular	0.9538	0.0321	0.0141	1.60932	0.000536813	-2.87905	-1.63063	+		+	8397350	3899000	7699930	NA	4	1	2	4	14	7	0	0	0	0	1	21202000	16211000	231120000	39441000	0	920000
P47875	Cysteine and glycine-rich protein 1	Csrp1	8	8	8	54.9	20.613	0	323.31	8032600000	115					Intracellular	0.5506	Intracellular	0.9613	0.0003	0.0384	0.903394	0.00184733	-2.95316	-1.20214	+		+	198760000	81453000	11758100	14141200	4	3	20	21	19	21	0	13	8	3	10	2100300000	1849900000	1990300000	1491100000	0	253710000
Q62908;G3V9V9;Q5U202	Cysteine and glycine-rich protein 2	Csrp2	7	7	7	42	20.94	0	86.204	1000100000	24					UPS	0.5434	Intracellular	0.9645	0.0011	0.0344	3.32773	0	-4.28958	-3.01076	+		+	28200000	NA	24192500	NA	4	0	1	2	11	10	0	0	0	0	0	33360000	36883000	690650000	239200000	0	0
P36201	Cysteine-rich protein 2	Crip2	2	2	2	23.1	22.696	0	19.059	174890000	16					Intracellular	0.5509	Intracellular	0.8901	0.0003	0.1097	1.91916	0.0005	-2.47243	-1.65258	+		+	4834200	NA	3058730	NA	4	0	5	4	2	2	0	0	1	0	2	43760000	69945000	15884000	36447000	0	3136900
P00173	Cytochrome b5	Cyb5a	2	2	2	25.4	15.355	0	14.436	112140000	7		+			UPS	0.615	Intracellular	0.9527	0	0.0473	1.49726	0.000870466	-2.49915	-1.47213	+		+	4543800	NA	510862	NA	3	0	3	2	0	2	0	0	0	0	0	35764000	43515000	0	32865000	0	0
Q68FY0	Cytochrome b-c1 complex subunit 1, mitochondrial	Uqcrc1	16	16	16	49.8	52.848	0	151.85	1697900000	81					Intracellular	0.5685	Intracellular	0.8519	0.0164	0.1316	4.50727	0	-4.95938	-3.98364	+		+	49876700	NA	13298200	NA	4	0	24	19	13	25	0	0	0	0	0	481880000	498420000	329150000	376520000	0	0
P32551	Cytochrome b-c1 complex subunit 2, mitochondrial	Uqcrc2	15	15	15	57.1	48.396	0	174.7	2153800000	79					Intracellular	0.5851	Intracellular	0.9576	0.0013	0.0411	4.39486	0	-6.16185	-4.47066	+		+	64041700	NA	20034000	NA	4	0	20	21	17	21	0	0	0	0	0	627180000	765800000	254070000	506710000	0	0
B2RYS2	Cytochrome b-c1 complex subunit 7	Uqcrb	2	2	2	20.7	13.558	0.00041051	3.3314	149370000	3					Intracellular	0.9345	Intracellular	0.9362	0.0001	0.0637	1.14082	0.00296142	-1.8397	-1.11845	+		+	4883200	NA	1666540	NA	3	0	1	1	0	1	0	0	0	0	0	41687000	54178000	28195000	25315000	0	0
P20788	Cytochrome b-c1 complex subunit Rieske, mitochondrial;Cytochrome b-c1 complex subunit 11	Uqcrfs1	4	4	4	25.2	29.445	0	8.4277	452350000	18		+			Intracellular	0.6126	Intracellular	0.6808	0.0422	0.2769	5.2522	0	-4.04317	-3.77838	+		+	13401800	NA	2898130	NA	4	0	5	6	1	6	0	0	0	0	0	113340000	143160000	94324000	101540000	0	0
P05503	Cytochrome c oxidase subunit 1	Mtco1	2	2	2	7.8	56.844	0	12.949	289110000	7		+			Transmembrane	0.9678	Transmembrane	0.0265	0.0057	0.9678	4.83161	0	-4.07611	-3.63482	+		+	8507750	NA	1855660	NA	4	0	2	2	2	1	0	0	0	0	0	68108000	125250000	57036000	38718000	0	0
P00406	Cytochrome c oxidase subunit 2	Mtco2	3	3	3	24.7	25.928	0	7.8977	545570000	19		+			Transmembrane	0.9993	Transmembrane	0	0.0007	0.9993	4.19195	0	-4.14597	-3.3921	+		+	16050500	NA	5971730	NA	4	0	5	3	7	4	0	0	0	0	0	190750000	129960000	145290000	79583000	0	0
P10888	Cytochrome c oxidase subunit 4 isoform 1, mitochondrial	Cox4i1	7	7	7	44.4	19.514	0	11.971	1576400000	26					UPS	0.5729	Intracellular	0.9956	0.0015	0.003	4.073	0	-5.52901	-3.97505	+		+	45206000	NA	18340500	NA	4	0	9	4	4	9	0	0	0	0	0	527700000	491340000	334300000	223020000	0	0
P11240	Cytochrome c oxidase subunit 5A, mitochondrial	Cox5a	5	5	5	49.3	16.129	0	10.044	351690000	6					Intracellular	0.9242	Intracellular	0.9158	0.032	0.0522	4.18963	0.000108527	-3.23898	-2.86589	+		+	10445700	NA	3400700	NA	4	0	1	2	1	2	0	0	0	0	0	140860000	102100000	60058000	48667000	0	0
P12075	Cytochrome c oxidase subunit 5B, mitochondrial	Cox5b	4	4	4	40.3	13.915	0	14.38	292150000	16					UPS	0.549	Intracellular	0.8619	0.0343	0.1037	4.62545	0	-3.51495	-3.19304	+		+	8670380	NA	1605570	NA	4	0	5	4	2	5	0	0	0	0	0	98303000	96759000	49897000	47189000	0	0
P62898;D4A5L9;CON__P62894	Cytochrome c, somatic	Cycs;LOC679794	7	7	7	51.4	11.605	0	38.532	1653900000	32					UPS	0.6175	Intracellular	0.8586	0.0001	0.1413	0.993345	0.00151938	-2.76586	-1.23946	+		+	42545500	17114700	4524600	4624940	4	3	5	5	7	9	0	1	2	0	3	393340000	449290000	327900000	353000000	0	45644000
Q64678;D4A6I4;A0A0G2K173	Cytochrome P450 1B1	Cyp1b1	5	5	5	19.3	60.556	0	13.26	54228000	10		+			Transmembrane	0.9595	Transmembrane	0.003	0.0376	0.9595	1.08664	0.00808089	-1.43327	-0.964068	+		+	1974500	NA	1249470	NA	3	0	1	1	1	7	0	0	0	0	0	3255100	4987400	12235000	33751000	0	0
F1LSK6;Q6P7D4	Cytochrome P450 20A1	Cyp20a1	10	10	10	32.3	51.967	0	38.915	316980000	33		+			Transmembrane	0.5028	Transmembrane	0.0003	0.4969	0.5028	4.06367	0	-4.12481	-3.31969	+		+	9047430	NA	2398930	NA	4	0	13	9	5	6	0	0	0	0	0	94741000	99552000	70158000	42772000	0	0
M0R9X8;F1LRT9;P38650	Cytoplasmic dynein 1 heavy chain 1	Dync1h1	170	170	170	52.5	532.04	0	323.31	15300000000	750					Intracellular	0.5477	Intracellular	0.9458	0.0001	0.054	3.74733	0	-5.07391	-3.57383	+		+	443890000	15654100	99581000	8250480	4	4	174	181	192	177	0	8	10	1	7	3783800000	3900000000	3993800000	3350000000	0	79716000
G3V792;Q63100	Cytoplasmic dynein 1 intermediate chain 1	Dync1i1	10	9	9	33.3	72.677	0	79.307	240470000	27					Intracellular	0.5457	Intracellular	0.8586	0	0.1414	1.81713	0.000371094	-2.87948	-1.73769	+		+	8483470	NA	4084250	NA	3	0	2	1	12	12	0	0	0	0	0	28170000	24526000	78879000	107010000	0	0
D3ZU74;Q6AZ35;G3V9V3;Q62871	Cytoplasmic dynein 1 intermediate chain 2	Dync1i2	13	13	12	46.6	68.362	0	96.575	983260000	55					Intracellular	0.5442	Intracellular	0.7954	0.0013	0.2033	1.95388	0.000198347	-3.99037	-2.09706	+		+	25044700	14840000	5758960	NA	4	1	18	13	11	12	0	0	1	0	0	281360000	253340000	205820000	182570000	0	9740200
G3V7G0;Q9QXU8	Cytoplasmic dynein 1 light intermediate chain 1	Dync1li1	8	8	8	24.7	56.67	0	32.831	325670000	28					Intracellular	0.6583	Intracellular	0.9935	0.0024	0.0041	4.68874	0	-3.57782	-3.25677	+		+	9441750	NA	2078090	NA	4	0	5	8	7	8	0	0	0	0	0	73126000	85547000	93283000	69456000	0	0
Q5D023;Q62698;A0A096MIY2;A0A096MKA1	Cytoplasmic dynein 1 light intermediate chain 2	Dync1li2	15	15	15	51.2	54.114	0	164.49	735070000	64					Intracellular	0.6601	Intracellular	0.9412	0.0004	0.0585	5.68535	0	-5.1483	-4.72201	+		+	21116000	NA	1359950	NA	4	0	18	13	18	15	0	0	0	0	0	161590000	202220000	215670000	141140000	0	0
Q68FS4	Cytosol aminopeptidase	Lap3	22	22	22	69	56.149	0	162.46	1635800000	93					Intracellular	0.5436	Intracellular	0.9005	0.014	0.0856	1.00887	0.00236624	-2.2548	-1.15534	+		+	40324500	18942300	4299850	4823660	4	3	20	19	14	28	0	2	2	0	8	341970000	386340000	427740000	349620000	0	46689000
Q6Q0N1	Cytosolic non-specific dipeptidase	Cndp2	8	8	8	30.5	52.693	0	46.665	226790000	30					UPS	0.5238	Intracellular	0.9377	0	0.0623	1.30719	0.00233409	-1.75086	-1.1576	+		+	5661000	5927500	1522720	NA	4	1	6	4	5	13	0	0	0	0	2	60264000	58094000	37758000	64376000	0	0
A0A0A0MXZ3;P84850	D-2-hydroxyglutarate dehydrogenase, mitochondrial	D2hgdh	4	4	4	14	57.74	0	7.857	46151000	7					Intracellular	0.6465	Intracellular	0.9411	0.0019	0.057	0.130351	0.680027	-0.157403	-0.125509				1655630	NA	199239	NA	3	0	3	1	0	3	0	0	0	0	0	13663000	13990000	0	13094000	5402700	0
O08651	D-3-phosphoglycerate dehydrogenase	Phgdh	13	13	13	38.3	56.493	0	47.82	924790000	50					Intracellular	0.5357	Intracellular	0.9817	0.0005	0.0177	4.43361	0	-5.97521	-4.41915	+		+	26769300	NA	12620200	NA	4	0	7	8	20	15	0	0	0	0	0	160530000	119850000	406170000	238250000	0	0
A0A0G2JSH2;P29147	D-beta-hydroxybutyrate dehydrogenase, mitochondrial	Bdh1	6	6	6	29.1	38.333	0	37.394	112580000	16					UPS	0.5711	Intracellular	0.8816	0.0045	0.1139	4.45057	0.000201439	-2.10917	-2.12282	+		+	3313820	NA	518102	NA	4	0	5	5	4	2	0	0	0	0	0	41185000	28182000	28502000	14707000	0	0
P80254;A0A1W2Q637	D-dopachrome decarboxylase	Ddt	5	5	5	60.2	13.133	0	38.278	322380000	19					UPS	0.5476	Intracellular	0.8453	0.0552	0.0995	3.41879	8.87e-05	-3.16193	-2.54367	+		+	9374370	NA	975137	NA	4	0	5	5	4	4	0	1	0	0	0	42766000	79506000	113960000	84677000	0	0
A0A0G2K9I7;A0A0G2JVM0;A0A0G2JUB9;A0A0G2JUT5;P0C2X9	Delta-1-pyrroline-5-carboxylate dehydrogenase, mitochondrial	Aldh4a1	8	8	8	22.9	57.787	0	64.342	206230000	30					Intracellular	0.6999	Intracellular	0.9366	0.0038	0.0596	2.60418	0.000197183	-2.86398	-2.08372	+		+	6265000	NA	2554090	NA	4	0	9	8	2	11	0	0	0	0	0	69090000	60378000	3428400	73332000	0	0
Q7M0E3;D4A315	Destrin	Dstn	12	12	12	64.8	18.533	0	250.23	6563700000	91					UPS	0.6162	Intracellular	0.9991	0.0001	0.0007	1.13082	0.000966809	-3.4577	-1.44061	+		+	168003000	46378300	33975100	13965500	4	3	17	21	20	15	0	8	8	0	2	1637900000	1636300000	1907700000	1049900000	0	161580000
Q6P6R2	Dihydrolipoyl dehydrogenase, mitochondrial	Dld	17	17	17	61.7	54.037	0	166.03	2644700000	96					Intracellular	0.5796	Intracellular	0.818	0.0007	0.1813	3.98067	0	-5.47893	-3.89121	+		+	74307200	4566500	20055800	NA	4	1	29	19	18	28	0	0	1	0	1	567490000	738590000	427660000	892750000	0	1831600
P08461	Dihydrolipoyllysine-residue acetyltransferase component of pyruvate dehydrogenase complex, mitochondrial	Dlat	15	15	15	34.8	67.165	0	169.15	1664300000	88					Intracellular	0.525	Intracellular	0.7454	0.0108	0.2437	5.13736	0	-5.62402	-4.71407	+		+	49455000	NA	7469130	NA	4	0	19	23	22	24	0	0	0	0	0	496340000	375680000	338070000	454200000	0	0
G3V6P2;Q01205	Dihydrolipoyllysine-residue succinyltransferase component of 2-oxoglutarate dehydrogenase complex, mitochondrial	Dlst	12	12	12	31.7	48.899	0	48.758	694510000	41					Intracellular	0.567	Intracellular	0.94	0.0033	0.0567	4.1183	0	-4.47512	-3.5249	+		+	20755500	NA	7327960	NA	4	0	7	7	7	20	0	0	0	0	0	194850000	175820000	78663000	245180000	0	0
P47942	Dihydropyrimidinase-related protein 2	Dpysl2	30	30	26	71.9	62.277	0	210.42	4577300000	218					Intracellular	0.6988	Intracellular	0.8494	0.0001	0.1505	1.12804	0.000969283	-3.47757	-1.44128	+		+	117360000	32297700	8228180	4442290	4	3	43	47	51	42	0	10	11	0	14	1004600000	1124500000	1246600000	982380000	0	79407000
Q62952	Dihydropyrimidinase-related protein 3	Dpysl3	27	24	23	76.8	61.967	0	271.68	5140000000	190					Intracellular	0.6416	Intracellular	0.8625	0	0.1375	1.09882	0.00110197	-3.06877	-1.36019	+		+	124783000	41002300	13029700	8475220	4	3	39	38	38	50	0	7	8	0	10	1136700000	1116700000	1320000000	1320700000	0	69306000
Q9EPB1	Dipeptidyl peptidase 2	Dpp7	16	16	16	58	55.114	0	218.66	3168500000	125	+			+	Signal-peptide	0.8856	Signal-peptide	0.0005	0.8856	0.1139	3.31375	0.000847636	-1.53699	-1.49922	+		+	77543500	27360700	9382360	7465870	4	4	23	25	25	26	0	4	6	11	5	788210000	795600000	616460000	729330000	0	25038000
O55096	Dipeptidyl peptidase 3	Dpp3	17	17	17	43.5	83.038	0	280.73	723530000	103					Intracellular	0.5476	Intracellular	0.7657	0.0201	0.2142	1.35035	0.00173538	-1.87112	-1.21553	+		+	17818000	8316330	941586	3129930	4	3	24	21	19	23	0	8	6	0	2	162600000	171870000	188680000	150600000	0	12160000
A0A0G2K1M2;F1LNM0;Q62696	Disks large homolog 1	Dlg1	5	5	5	8.9	101.16	0	5.2995	94291000	6					Intracellular	0.5842	Intracellular	0.9606	0.0002	0.0392	0.803941	0.0171238	-1.42026	-0.846167	+		+	3402500	NA	431428	NA	3	0	2	1	0	3	0	0	0	0	0	24004000	39059000	9939700	21288000	0	0
G3V8T4;Q9ESW0	DNA damage-binding protein 1	Ddb1	19	19	19	20	126.94	0	75.153	753850000	81					Intracellular	0.5116	Intracellular	0.9282	0.0007	0.0711	1.62706	0.000298826	-4.07708	-1.89363	+		+	20936500	3566870	4894370	2862320	4	3	13	15	26	21	0	2	2	0	2	141930000	176600000	237480000	170980000	0	4565800
P43138	DNA-(apurinic or apyrimidinic site) lyase;DNA-(apurinic or apyrimidinic site) lyase, mitochondrial	Apex1	6	6	6	32.8	35.538	0	14.829	151680000	14					UPS	0.5729	Intracellular	0.8788	0.0001	0.1211	3.02191	0.000194444	-2.50742	-2.06073	+		+	4353880	NA	490407	NA	4	0	2	0	5	7	0	0	0	0	0	17816000	22156000	61223000	47956000	0	0
Q5M9H7;O35824	DnaJ homolog subfamily A member 2	Dnaja2	7	7	7	28.2	45.745	0	50.33	284560000	26					Intracellular	0.6781	Intracellular	0.9172	0	0.0828	5.31956	0	-3.74226	-3.58641	+		+	8419300	NA	1550950	NA	4	0	4	8	8	6	0	0	0	0	0	45066000	59229000	82654000	97615000	0	0
Q6TUG0	DnaJ homolog subfamily B member 11	Dnajb11	8	8	8	32.7	40.495	0	27.287	470980000	57	+			+	Signal-peptide	0.9174	Signal-peptide	0.0008	0.9174	0.0818	3.73127	0	-3.98981	-3.0915	+		+	12592100	NA	2691490	NA	4	0	11	16	18	9	0	1	0	2	0	97578000	146320000	150920000	71166000	0	1901400
Q498R3	DnaJ homolog subfamily C member 10	Dnajc10	4	4	4	7.7	90.746	0	14.363	69839000	12	+		+		Transmembrane	0.8161	Transmembrane	0.028	0.1559	0.8161	1.87581	0.00173405	-1.49577	-1.21498	+		+	2051750	NA	712825	NA	4	0	3	5	2	2	0	0	0	0	0	7771200	32061000	15636000	14371000	0	0
Q9R0T3;A0A1W2Q6P6	DnaJ homolog subfamily C member 3	Dnajc3	5	5	5	23.2	57.56	0	71.327	172440000	29	+			+	Signal-peptide	0.8804	Signal-peptide	0.1182	0.8804	0.0014	5.10815	0	-3.43269	-3.29223	+		+	5093750	NA	700077	NA	4	0	2	9	8	9	0	1	0	0	0	39087000	54328000	40152000	38870000	0	0
P60905;A0A0G2JX56	DnaJ homolog subfamily C member 5	Dnajc5	2	2	2	29.8	22.101	0	23.562	47213000	13					Intracellular	0.553	Intracellular	0.931	0.0001	0.0689	0.416817	0.23311	-0.55938	-0.401163				1565570	NA	460066	NA	3	0	3	2	5	3	0	0	0	0	0	10393000	7825900	12580000	16413000	0	0
Q641Y0	Dolichyl-diphosphooligosaccharide--protein glycosyltransferase 48 kDa subunit	Ddost	15	15	15	54.9	48.895	0	323.31	3223300000	132	+	+			Signal-peptide	0.6752	Signal-peptide	0.1317	0.6752	0.1931	5.74405	0	-6.73915	-5.7532	+		+	91198300	NA	15100400	NA	4	0	31	37	34	30	0	0	0	0	0	764700000	848250000	1009300000	601020000	0	0
Q6P7A7;P07153	Dolichyl-diphosphooligosaccharide--protein glycosyltransferase subunit 1	Rpn1	26	26	26	56.9	68.4	0	287.01	5753800000	149	+	+			Signal-peptide	0.9999	Signal-peptide	0	0.9999	0.0001	6.13525	0	-7.49895	-6.49314	+		+	167055000	NA	16570500	NA	4	0	33	38	47	31	0	0	0	0	0	1419900000	1458900000	1650000000	1218900000	0	0
A0A0G2K757;P25235	Dolichyl-diphosphooligosaccharide--protein glycosyltransferase subunit 2	Rpn2	26	26	26	70.5	69.122	0	323.31	4384100000	198	+	+			Signal-peptide	0.8704	Signal-peptide	0.0573	0.8704	0.0723	5.37795	0	-7.74489	-5.99241	+		+	124672000	NA	8616670	NA	4	0	42	49	62	45	0	0	0	0	0	1143700000	1156800000	1221400000	859880000	0	1651500
P61805	Dolichyl-diphosphooligosaccharide--protein glycosyltransferase subunit DAD1	Dad1	3	3	3	26.5	12.497	0	33.357	331950000	24		+			Transmembrane	0.9376	Transmembrane	0.0108	0.0516	0.9376	5.85286	0	-4.15874	-4.07855	+		+	8484480	NA	950951	NA	4	0	6	5	9	4	0	0	0	0	0	87365000	100840000	87579000	56168000	0	0
Q9JHL4	Drebrin-like protein	Dbnl	5	5	5	18.1	48.612	0	11.23	76302000	9					Intracellular	0.5462	Intracellular	0.9396	0.0001	0.0603	1.52788	0.00414203	-1.37331	-1.0696	+		+	2620230	NA	1278670	NA	3	0	4	1	3	1	0	0	0	0	0	12858000	29299000	26588000	7556300	0	0
A0A0H2UHI2;Q01986	Dual specificity mitogen-activated protein kinase kinase 1	Map2k1	6	6	5	32.9	40.96	0	32.023	108860000	13					Intracellular	0.5481	Intracellular	0.9419	0	0.0581	1.25448	0.00455675	-1.49263	-1.04359	+		+	3121350	NA	2601590	NA	4	0	2	2	7	2	0	0	0	0	0	23090000	14371000	54943000	16460000	0	0
A0A0G2K428;D4A8U7;P28023	Dynactin subunit 1	Dctn1	21	21	21	31.2	139.84	0	172.32	492610000	74					Intracellular	0.5889	Intracellular	0.5878	0.0151	0.3972	3.10626	9.54e-05	-3.73134	-2.6695	+		+	14595500	NA	1832020	NA	4	0	16	24	12	22	0	0	0	0	0	98458000	136440000	117670000	140040000	0	0
A0A0G2JUC7;Q6AYH5	Dynactin subunit 2	Dctn2	13	13	13	51.4	46.222	0	71.084	559990000	52					Intracellular	0.5417	Intracellular	0.9222	0	0.0778	2.99518	9.21e-05	-3.70938	-2.60523	+		+	15593800	2419700	4736550	NA	4	1	14	14	11	11	0	0	0	0	2	119020000	188790000	126140000	123130000	0	0
Q9QUR2	Dynactin subunit 4	Dctn4	4	4	4	10.5	53.088	0	6.1442	66955000	11					Intracellular	0.5833	Intracellular	0.943	0.0036	0.0535	2.44112	0.001308	-1.40487	-1.27231	+		+	1979370	NA	216542	NA	4	0	2	5	2	2	0	0	0	0	0	18459000	15308000	17289000	15898000	0	0
O35303	Dynamin-1-like protein	Dnm1l	12	12	12	28.1	83.907	0	56.723	317030000	45					Intracellular	0.5895	Intracellular	0.698	0.0494	0.2526	7.6173	0	-3.57562	-3.99315	+		+	9340300	NA	806651	NA	4	0	11	10	8	16	0	0	0	0	0	89683000	62237000	84997000	78910000	0	1201200
A0A0A0MY48;A0A0A0MY49;P39052	Dynamin-2	Dnm2	6	6	5	8.7	97.253	0	65.609	214480000	22					Intracellular	0.7184	Intracellular	0.8842	0.0003	0.1154	4.97335	0	-3.60876	-3.3757	+		+	6314680	NA	626731	NA	4	0	7	5	6	4	0	0	0	0	0	49838000	59452000	57907000	47279000	0	0
Q2TA68	Dynamin-like 120 kDa protein, mitochondrial;Dynamin-like 120 kDa protein, form S1	Opa1	7	7	7	15.3	111.31	0	15.403	124980000	19		+			Intracellular	0.549	Intracellular	0.8214	0.0058	0.1728	2.07511	0.000820604	-2.02581	-1.52832	+		+	3734380	NA	887923	NA	4	0	5	8	0	6	0	0	0	0	0	30824000	40825000	18965000	34362000	0	0
Q78P75	Dynein light chain 2, cytoplasmic	Dynll2	2	2	1	25.8	10.35	0.0004417	4.2242	382290000	5					UPS	0.618	Intracellular	0.9452	0	0.0548	1.23937	0.00110107	-2.59324	-1.3599	+		+	10373600	NA	790298	NA	3	0	1	2	0	2	0	0	0	0	0	81480000	89114000	116200000	64753000	0	12822000
P62628	Dynein light chain roadblock-type 1	Dynlrb1	3	3	3	38.5	10.99	0	18.311	211020000	14					UPS	0.5519	Intracellular	0.8114	0.0002	0.1884	3.1622	0.000215109	-2.73472	-2.22767	+		+	6153150	NA	1867520	NA	4	0	3	3	6	2	0	0	0	0	0	45310000	68206000	65559000	31940000	0	0
Q9Z336	Dynein light chain Tctex-type 1	Dynlt1	2	2	2	35.4	12.452	0	11.941	80335000	7					Intracellular	0.5507	Intracellular	0.5143	0.01	0.4758	2.45934	0.000967632	-1.66917	-1.44105	+		+	2119020	NA	700542	NA	4	0	1	2	2	2	0	0	0	0	0	25993000	13468000	27643000	13231000	0	0
P82458	E3 ubiquitin-protein ligase Midline-1	Mid1	12	12	12	25.5	75.21	0	52.938	423160000	36					Intracellular	0.5607	Intracellular	0.9644	0.0056	0.03	3.35165	0.000102377	-3.75507	-2.79945	+		+	12608800	NA	2475390	NA	4	0	8	7	8	13	0	0	0	0	0	102810000	55799000	111610000	152940000	0	0
A0A0G2K8P3;A0A0G2K0B4;Q62940;A0A0G2JUY1	E3 ubiquitin-protein ligase NEDD4	Nedd4	25	25	22	41.2	102.75	0	178.89	2017700000	111					Intracellular	0.5474	Intracellular	0.88	0	0.12	4.20138	0	-6.17613	-4.32923	+		+	59435300	NA	13868700	NA	4	0	28	22	29	32	0	0	0	0	0	376000000	397610000	538270000	703990000	0	354730
A0A0A0MXY4;A0A1W2Q676;A0A0G2JU73;F1LP64	E3 ubiquitin-protein ligase TRIP12	Trip12	9	9	9	9.3	218.1	0	23.336	51417000	16					Intracellular	0.5689	Intracellular	0.9358	0.0003	0.0639	0.103276	0.762697	-0.110402	-0.0925191				1446400	NA	319655	NA	4	0	4	2	9	1	0	0	0	0	0	12481000	9150200	17671000	10205000	0	0
A0A0G2JU89;F1LQI5;Q2TL32	E3 ubiquitin-protein ligase UBR4	Ubr4	15	15	15	6.3	573.87	0	66.851	145950000	39		+			Intracellular	0.5036	Intracellular	0.9561	0.0218	0.0221	2.4865	0.000423041	-2.06523	-1.66865	+		+	4267920	NA	183578	NA	4	0	6	7	14	12	0	0	0	0	0	24216000	35335000	50198000	36202000	0	0
A0A0G2K266;B2GV24	E3 UFM1-protein ligase 1	Ufl1	7	7	7	13.4	83.633	0	12.519	144470000	20					Intracellular	0.5684	Intracellular	0.947	0	0.0529	4.44516	9.26e-05	-2.7645	-2.62221	+		+	4314050	NA	997234	NA	4	0	8	5	2	5	0	0	0	0	0	46704000	39097000	23826000	34841000	0	0
M0RCT5;Q4V8C3;M0RDD8	Echinoderm microtubule-associated protein-like 1	Eml1	6	6	6	12.1	85.75	0	29.817	117540000	15					Intracellular	0.5457	Intracellular	0.9527	0.0001	0.0472	0.780893	0.0326045	-1.11164	-0.738919	+		+	3639770	NA	1118890	NA	3	0	3	3	8	1	0	0	0	0	0	20773000	23901000	57531000	15334000	0	0
Q924C3;G3V7V4	Ectonucleotide pyrophosphatase/phosphodiesterase family member 1;Alkaline phosphodiesterase I;Nucleotide pyrophosphatase	Enpp1	18	18	18	29.1	102.94	0	172.69	808780000	97		+			Transmembrane	0.6512	Transmembrane	0.1409	0.2079	0.6512	3.2821	0.00443522	-0.993985	-1.04893	+		+	19041000	9648750	1755550	1728960	4	4	18	18	22	18	0	7	6	4	4	139270000	198420000	205320000	173090000	0	24851000
Q4V8H8	EH domain-containing protein 2	Ehd2	17	17	16	56.4	61.237	0	85.559	953510000	49					Intracellular	0.5473	Intracellular	0.9189	0.0001	0.0811	2.40283	0.000158192	-3.99946	-2.37786	+		+	27125500	5849900	14696300	NA	4	1	16	18	11	1	0	1	2	0	0	305080000	351550000	208770000	73165000	0	12823000
Q8R491;A0A0G2JTH6	EH domain-containing protein 3	Ehd3	10	10	4	30.3	60.79	0	34.36	165510000	28					Intracellular	0.5658	Intracellular	0.9056	0.0005	0.0938	1.2825	0.00194207	-1.90496	-1.19912	+		+	4119500	2620200	1723520	2097990	4	2	5	4	8	11	0	0	0	0	0	29977000	18882000	42528000	65451000	0	1542100
B5DF91	ELAV-like protein	Elavl1	4	4	4	14.1	36.169	0	8.4284	277250000	13					UPS	0.5508	Intracellular	0.8453	0.0001	0.1546	3.90304	0	-3.88358	-3.11961	+		+	8156180	NA	835407	NA	4	0	3	4	2	4	0	0	0	0	0	57603000	72721000	79861000	67069000	0	0
P13803	Electron transfer flavoprotein subunit alpha, mitochondrial	Etfa	17	17	17	60.7	34.951	0	91.584	2110000000	75					UPS	0.6143	Intracellular	0.9706	0.0141	0.0153	5.51569	0	-7.02606	-5.74357	+		+	61917700	NA	15025300	NA	4	0	21	17	12	25	0	0	0	0	0	637660000	498660000	344830000	619290000	1620600	0
Q68FU3	Electron transfer flavoprotein subunit beta	Etfb	10	10	10	59.2	27.687	0	35.87	1711400000	34					UPS	0.5309	Intracellular	0.9683	0.0003	0.0313	3.98449	0	-5.88279	-4.05198	+		+	50627500	NA	9654940	NA	4	0	7	7	7	13	0	0	0	0	0	416930000	474160000	296150000	524200000	0	0
Q66HF3;Q6UPE1	Electron transfer flavoprotein-ubiquinone oxidoreductase, mitochondrial	Etfdh	8	8	8	19.2	68.163	0	16.083	210960000	21					Intracellular	0.5598	Intracellular	0.998	0.0001	0.0019	3.31067	0.00021	-2.58026	-2.18937	+		+	6325570	NA	2033640	NA	4	0	6	9	1	5	0	0	0	0	0	59669000	98400000	4718600	47143000	0	0
F1LPE9;A0A0G2JYT1;Q811U3;A0A0G2K140;D3ZMM4;Q8K3M6	ELKS/Rab6-interacting/CAST family member 1	Erc1	3	3	3	5.2	108.83	0	9.6842	43568000	9					Intracellular	0.6864	Intracellular	0.9156	0.0002	0.0842	1.07588	0.0885892	-0.650018	-0.583434				1440530	NA	192781	NA	3	0	3	0	3	3	0	0	0	0	0	12856000	6876200	13772000	10064000	0	0
P62630;M0R757;F1M6C2;P62632	Elongation factor 1-alpha 1;Elongation factor 1-alpha	Eef1a1;LOC100360413;LOC100360150	23	23	23	67.3	50.113	0	323.31	58000000000	699					UPS	0.5033	Intracellular	0.9767	0.0001	0.0232	2.09061	0.000290758	-2.8435	-1.85633	+		+	1427370000	257441000	169200000	147073000	4	4	134	151	169	137	0	38	30	5	35	13400000000	12800000000	17000000000	11800000000	0	971180000
Q68FR9	Elongation factor 1-delta	Eef1d	11	11	11	59.8	31.33	0	323.31	3571400000	66					UPS	0.5331	Intracellular	0.9395	0	0.0605	2.73357	0.000111554	-5.19866	-2.91622	+		+	98867700	5657430	14019100	3014820	4	3	12	15	18	20	0	1	0	0	0	769660000	799950000	1149200000	793160000	0	31185000
Q68FR6	Elongation factor 1-gamma	Eef1g	21	21	21	73	50.06	0	323.31	9909900000	277					Intracellular	0.5423	Intracellular	0.8118	0.0006	0.1876	1.62181	0.000829443	-2.52307	-1.53851	+		+	260655000	62789300	14247100	36786800	4	4	53	39	51	51	0	31	20	8	24	1984700000	2555500000	2532400000	2144900000	0	218720000
P05197	Elongation factor 2	Eef2	47	47	46	67.2	95.283	0	323.31	16100000000	443					Intracellular	0.5668	Intracellular	0.9789	0.0015	0.0196	1.22345	0.00406676	-1.59513	-1.07145	+		+	388960000	162045000	58395700	91535000	4	4	70	76	99	78	0	29	41	10	40	3272400000	3340000000	4072400000	3576100000	0	607470000
Q9QYU2	Elongation factor Ts, mitochondrial	Tsfm	3	3	3	25.9	35.178	0	20.046	36358000	12					UPS	0.6221	Intracellular	0.9142	0.0659	0.0199	1.70338	0.00440517	-1.27014	-1.05569	+		+	1271370	NA	46921.2	NA	3	0	4	3	3	2	0	0	0	0	0	16236000	8672000	3086500	8363800	0	0
P85834	Elongation factor Tu, mitochondrial	Tufm	20	20	20	59.1	49.522	0	123.27	2096400000	85					Intracellular	0.583	Intracellular	0.9547	0.001	0.0443	4.2644	0	-5.63145	-4.14996	+		+	61692800	NA	13033100	NA	4	0	23	22	14	26	0	0	0	0	0	553240000	574810000	359090000	609250000	0	0
F1LP76;Q8VHU4	Elongator complex protein 1	Ikbkap	9	9	9	9.4	149.2	0	40.984	116090000	35					UPS	0.5203	Intracellular	0.9928	0.0004	0.0068	2.66534	0.000499062	-1.93807	-1.64532	+		+	3452150	NA	78159.1	NA	4	0	7	10	7	11	0	0	0	0	0	25303000	27561000	26868000	36361000	0	0
Q6PCU4;Q63190	Emerin	Emd	5	5	5	35.8	29.585	0	152.32	422110000	40		+			Intracellular	0.8579	Intracellular	0.9473	0.0001	0.0526	4.08184	0	-4.06075	-3.29487	+		+	12338100	NA	4173960	NA	4	0	12	13	7	8	0	0	0	0	0	126550000	148020000	73356000	74187000	0	0
O35964;O35179	Endophilin-A2	Sh3gl1	5	5	5	26.9	41.492	0	25.862	400340000	18					Intracellular	0.5592	Intracellular	0.9085	0.0001	0.0915	3.39861	0	-4.07766	-2.96283	+		+	11045100	NA	2416950	NA	4	0	5	3	5	5	0	0	0	0	0	84734000	73972000	154680000	67591000	0	0
A0A0G2K714;Q6AYE2	Endophilin-B1	Sh3glb1	5	5	5	19.5	43.078	0	31.436	115480000	13					Intracellular	0.5586	Intracellular	0.9929	0	0.0071	1.54922	0.00100421	-2.26417	-1.42627	+		+	3338120	NA	425285	NA	4	0	3	3	5	2	0	0	0	0	0	19641000	27782000	47752000	20305000	0	0
Q9JJ22;Q4KMA8;A0A0G2K2Y3	Endoplasmic reticulum aminopeptidase 1	Erap1	12	12	12	18.5	106.42	0	20.814	1072900000	34	+	+			Signal-peptide	0.9625	Signal-peptide	0.0018	0.9625	0.0357	1.12713	0.0011562	-2.71137	-1.31724	+		+	24720500	14865000	7218130	909334	4	2	6	4	12	9	0	0	0	1	2	73464000	750260000	138500000	95564000	0	1155800
P52555	Endoplasmic reticulum resident protein 29	Erp29	7	7	7	40.4	28.574	0	25.537	634090000	37	+			+	Signal-peptide	0.9975	Signal-peptide	0.0001	0.9975	0.0023	2.25728	0.000193326	-3.19851	-2.05425	+		+	16691000	4224300	4157550	34648.6	4	2	10	6	12	6	0	2	0	0	1	122940000	165100000	221670000	107090000	0	6654700
Q66HD0;A0A0A0MY09;A0A0G2K4I4	Endoplasmin	Hsp90b1	46	46	44	65.4	92.77	0	323.31	24300000000	515	+		+		Signal-peptide	0.9659	Signal-peptide	0.0014	0.9659	0.0327	2.26014	0.000248613	-2.93328	-1.96433	+		+	642390000	106550000	54005800	57920600	4	4	102	109	121	107	1	31	23	7	14	5734600000	6657100000	5989100000	4985900000	2549100	356050000
F7F707;Q3ZAV8	Enhancer of mRNA-decapping protein 4	Edc4	12	12	12	18.3	163.25	0	229	200910000	40					Intracellular	0.743	Intracellular	0.9233	0.0012	0.0755	3.77468	9.36e-05	-3.09339	-2.63584	+		+	5857120	NA	1023250	NA	4	0	10	8	12	10	0	0	0	0	0	34482000	49316000	72239000	44874000	0	0
P23965;Q68G41;A0A0G2K2R2	Enoyl-CoA delta isomerase 1, mitochondrial	Eci1	12	12	12	54.7	32.254	0	55.545	973400000	53					UPS	0.5697	Intracellular	0.8095	0.0408	0.1497	2.90208	9.93e-05	-4.26196	-2.75521	+		+	28014700	4464500	3285340	NA	4	1	14	15	10	11	0	2	0	0	1	257130000	254300000	213030000	236900000	0	2185200
Q5XIC0	Enoyl-CoA delta isomerase 2, mitochondrial	Eci2	6	6	4	25.6	43.021	0	40.917	158650000	16					UPS	0.5238	Intracellular	0.8907	0.0263	0.083	4.14836	0.000162319	-2.57673	-2.41471	+		+	4755980	NA	768827	NA	4	0	5	4	3	4	0	0	0	0	0	49580000	21606000	32973000	54487000	0	0
P14604	Enoyl-CoA hydratase, mitochondrial	Echs1	3	3	3	17.6	31.516	0	20.988	706030000	33					UPS	0.5527	Intracellular	0.9652	0.0066	0.0282	4.54954	0	-5.44663	-4.25364	+		+	20703500	NA	4280560	NA	4	0	11	7	7	8	0	0	0	0	0	155150000	210730000	135150000	199460000	0	0
P07687	Epoxide hydrolase 1	Ephx1	5	5	2	23.1	52.581	0	12.661	236060000	15		+			Transmembrane	0.8249	Transmembrane	0.0118	0.1633	0.8249	2.55286	0.000193548	-2.84904	-2.05669	+		+	7084920	NA	4184650	NA	4	0	3	4	3	5	0	0	0	0	0	53700000	38923000	39299000	102700000	0	0
M0R4Y0;Q6YAT4	Epsilon-sarcoglycan	Sgce	3	3	3	17.4	46.486	0	26.225	95764000	14		+			Intracellular	0.5443	Intracellular	0.9245	0.0007	0.0748	0.962899	0.0224977	-1.11246	-0.799619	+		+	2545330	NA	319463	NA	4	0	1	2	4	4	0	2	0	0	1	14175000	19869000	26687000	25721000	0	4030300
O54698	Equilibrative nucleoside transporter 1	Slc29a1	3	3	3	8.3	50.017	0.00041339	3.4278	37743000	5		+			Transmembrane	0.943	Transmembrane	0.0011	0.0559	0.943	0.324719	0.292751	-0.507465	-0.346715				1438220	NA	876744	NA	3	0	1	1	1	2	0	0	0	0	0	7653700	10630000	0	16853000	0	2606200
Q569A6	ER lumen protein-retaining receptor 1	Kdelr1	5	4	4	32.5	24.546	0	13.958	247190000	16		+			Transmembrane	0.5572	Transmembrane	0.016	0.4267	0.5572	2.80095	8.26e-05	-3.51814	-2.43461	+		+	7231470	NA	406643	NA	4	0	3	4	4	5	0	0	0	0	0	48646000	70558000	77472000	50518000	0	0
Q5U305	ER lumen protein-retaining receptor 2	Kdelr2	6	6	4	40.6	24.454	0	29.702	430790000	31		+			Transmembrane	0.68	Transmembrane	0.129	0.1911	0.68	2.66022	8.3e-05	-3.72369	-2.43722	+		+	12413000	NA	4509880	NA	4	0	11	7	9	4	0	0	0	0	0	117210000	91237000	182080000	40258000	0	0
A0A0A0MXU4;B0BNG0	ER membrane protein complex subunit 2	Emc2	4	4	4	23.3	34.513	0	8.3929	94424000	12					UPS	0.5699	Intracellular	0.9482	0.0012	0.0506	2.67134	0.000374384	-2.1375	-1.75828	+		+	2783000	NA	614948	NA	4	0	5	3	3	1	0	0	0	0	0	25782000	26409000	23875000	18358000	0	0
Q5U2V8	ER membrane protein complex subunit 3	Emc3	3	3	3	14.9	29.98	0	6.8768	51839000	12		+			Transmembrane	0.9922	Transmembrane	0.0065	0.0013	0.9922	2.17637	0.00131111	-1.4964	-1.28038	+		+	1528300	NA	236102	NA	4	0	3	5	1	3	0	0	0	0	0	11314000	16211000	12865000	11450000	0	0
B5DEH2;B1WBY7	Erlin-2	Erlin2	4	4	4	18	37.71	0	5.295	71898000	6		+			Signal-peptide	0.3899	Signal-peptide	0.3698	0.3899	0.2403	0.9995	0.0462099	-0.842242	-0.68274	+		+	2282330	NA	247366	NA	3	0	1	3	0	2	0	0	0	0	0	17629000	17863000	15872000	20534000	0	0
Q8R4A1	ERO1-like protein alpha	Ero1l	7	7	7	27.2	54.018	0	93.747	109090000	26	+			+	Signal-peptide	0.9343	Signal-peptide	0.0014	0.9343	0.0643	2.56354	0.000580349	-1.88207	-1.58866	+		+	3198500	NA	477022	NA	4	0	5	10	6	5	0	0	0	0	0	18704000	43104000	19293000	26728000	0	0
P56571	ES1 protein homolog, mitochondrial	N / A	6	6	6	34.2	28.172	0	16.372	1346700000	21					UPS	0.5314	Intracellular	0.8554	0.1041	0.0405	5.31491	0	-5.29333	-4.62303	+		+	32148000	NA	9388330	NA	4	0	5	9	1	6	0	0	0	0	0	401320000	405130000	207400000	322840000	0	5413900
A0A0G2K8B7;Q5RKI1	Eukaryotic initiation factor 4A-II;Eukaryotic initiation factor 4A-II, N-terminally processed	Eif4a2	15	8	8	66.6	41.29	0	30.349	266390000	22					Intracellular	0.5591	Intracellular	0.8995	0	0.1005	3.76737	0.000100358	-3.35546	-2.78123	+		+	7838470	NA	779044	NA	4	0	5	2	6	9	0	0	0	0	0	83321000	43984000	73752000	64033000	0	0
Q3B8Q2	Eukaryotic initiation factor 4A-III;Eukaryotic initiation factor 4A-III, N-terminally processed	Eif4a3	11	10	10	44.3	46.84	0	22.727	303100000	23					Intracellular	0.9346	Intracellular	0.9758	0.0001	0.0241	4.34203	0	-3.81441	-3.27232	+		+	9023630	NA	1171790	NA	4	0	1	11	5	6	0	0	0	0	0	45014000	109900000	54555000	93632000	0	0
Q5U2Q7	Eukaryotic peptide chain release factor subunit 1	Etf1	7	7	7	27.9	49.03	0	14.069	292450000	16					Intracellular	0.5022	Intracellular	0.9854	0	0.0146	4.49376	0	-4.16195	-3.54083	+		+	8256120	NA	979010	NA	4	0	4	4	4	4	0	0	0	0	0	59755000	60118000	106030000	57648000	0	4799900
A0A0G2JVA7;Q6VV72	Eukaryotic translation initiation factor 1A	Eif1a	2	2	1	20.8	16.499	0.0004384	4.1461	126160000	7					Intracellular	0.9345	Intracellular	0.9303	0	0.0697	2.39886	0.000536313	-2.03654	-1.62929	+		+	3669000	NA	326013	NA	4	0	1	2	1	3	0	0	0	0	0	22781000	34632000	45172000	23573000	0	0
P68101	Eukaryotic translation initiation factor 2 subunit 1	Eif2s1	11	11	11	50.5	36.108	0	107.78	1104800000	48					Intracellular	0.9344	Intracellular	0.9612	0	0.0388	1.79087	0.000365736	-2.84855	-1.71564	+		+	27853500	10905500	5217360	5142850	4	2	10	10	11	15	0	0	0	0	2	256740000	264430000	296070000	252210000	0	8139200
P81795;C9WPN6;A0A096MJB9;A0A1P0QU16	Eukaryotic translation initiation factor 2 subunit 3	Eif2s3;Eif2s3y	14	14	14	44.5	51.079	0	194.2	2027800000	66	+			+	Intracellular	0.5779	Intracellular	0.9393	0.0001	0.0605	1.34424	0.000846894	-2.95554	-1.49825	+		+	53505500	15849000	6827870	5459750	4	3	12	10	18	10	0	4	1	0	11	451630000	499130000	581580000	390690000	0	24984000
Q1JU68	Eukaryotic translation initiation factor 3 subunit A	Eif3a	18	18	18	18.6	163.19	0	57.81	544020000	67					Intracellular	0.8798	Intracellular	0.9663	0.0023	0.0314	2.01738	0.000304679	-3.14839	-1.91797	+		+	15001200	3245370	2449200	2241170	4	3	10	13	21	14	0	1	3	0	5	131690000	119320000	159460000	107680000	0	4355900
Q4G061	Eukaryotic translation initiation factor 3 subunit B	Eif3b	14	14	14	31	90.91	0	68.185	684870000	65					Intracellular	0.5458	Intracellular	0.9602	0.0001	0.0397	2.39958	0.000203636	-3.22638	-2.13302	+		+	18510500	4629050	1362810	1453740	4	2	15	15	13	15	0	4	0	0	3	177810000	124510000	197000000	168940000	0	5637200
B5DFC8	Eukaryotic translation initiation factor 3 subunit C	Eif3c	12	12	12	21.5	105.43	0	88.135	556940000	35					Intracellular	0.6834	Intracellular	0.9537	0	0.0463	4.96682	0	-4.44262	-3.92436	+		+	14586500	NA	2941490	NA	4	0	10	4	11	9	0	0	1	0	0	109010000	109500000	202220000	82850000	29337000	0
Q6AYK8	Eukaryotic translation initiation factor 3 subunit D	Eif3d	10	10	10	35.4	63.988	0	129.96	286040000	50					Intracellular	0.8796	Intracellular	0.9494	0.0001	0.0505	4.43426	0.00010219	-3.01866	-2.79802	+		+	8441320	NA	859122	NA	4	0	12	10	13	15	0	0	0	0	0	64929000	67738000	79055000	74316000	0	0
A0A0G2K273;Q641X8	Eukaryotic translation initiation factor 3 subunit E	Eif3e	10	10	10	33.7	52.228	0	24.978	214650000	29					Intracellular	0.545	Intracellular	0.9441	0.0007	0.0552	4.74023	0	-3.2975	-3.08289	+		+	6238530	NA	551247	NA	4	0	4	11	8	6	0	0	0	0	0	51405000	52670000	77772000	32801000	0	0
Q5RK09	Eukaryotic translation initiation factor 3 subunit G	Eif3g	4	4	4	20.9	35.651	0	6.1878	182580000	11					UPS	0.5563	Intracellular	0.9794	0	0.0205	4.22371	0.000101633	-3.10685	-2.79298	+		+	5448620	NA	320324	NA	4	0	3	2	2	4	0	0	0	0	0	41399000	61360000	29152000	50665000	0	0
D3ZL77;Q6P9U8	Eukaryotic translation initiation factor 3 subunit H	Eif3h	4	4	4	25	29.928	0	6.3578	142710000	11					UPS	0.6174	Intracellular	0.9169	0.0001	0.083	2.84012	0.000196721	-2.66405	-2.08138	+		+	4013970	NA	1024260	NA	4	0	3	3	2	3	0	0	0	0	0	34242000	17228000	49418000	37458000	0	1140800
B0BNA7;M0RCH0	Eukaryotic translation initiation factor 3 subunit I	Eif3i	6	6	6	35.1	36.46	0	45.38	242230000	29					UPS	0.6368	Intracellular	0.8372	0.0002	0.1625	3.82386	8.66e-05	-2.87434	-2.52098	+		+	7141350	NA	679755	NA	4	0	7	6	8	8	0	0	0	0	0	66703000	55278000	42855000	73766000	3628200	0
A0JPM9	Eukaryotic translation initiation factor 3 subunit J	Eif3j	5	5	5	30.1	29.187	0	12.025	117950000	20					Intracellular	0.5199	Intracellular	0.9318	0.0001	0.0681	3.40033	0.000343558	-1.98335	-1.83628	+		+	3461520	NA	408648	NA	4	0	4	8	3	5	0	0	0	0	0	23457000	33603000	34631000	26256000	0	0
G3V7G9	Eukaryotic translation initiation factor 3 subunit L	Eif3l	7	7	7	34	45.082	0	248.03	141460000	28					Intracellular	0.5642	Intracellular	0.9166	0.0002	0.0832	4.49209	0.000212121	-2.20382	-2.2062	+		+	4026900	NA	586104	NA	4	0	2	7	7	10	0	1	0	0	1	20426000	28514000	53961000	35373000	0	1897100
D3ZAZ0	Eukaryotic translation initiation factor 3 subunit M	Eif3m	7	7	7	32.9	42.516	0	313.44	377310000	23					UPS	0.5064	Intracellular	0.8877	0.0001	0.1122	2.31463	0.000205128	-3.41094	-2.15212	+		+	10248900	4828800	1183990	NA	4	1	7	2	5	5	0	0	1	0	3	91027000	87070000	76392000	117750000	0	0
P63074;A0A1W2Q627	Eukaryotic translation initiation factor 4E	Eif4e	3	3	3	24.9	25.053	0	20.754	169580000	13					UPS	0.5727	Intracellular	0.9727	0	0.0273	2.81637	0.000244809	-2.38893	-1.93438	+		+	4936180	NA	814621	NA	4	0	4	3	5	1	0	0	0	0	0	33374000	46030000	59430000	30744000	0	0
Q5XI72;A0A0G2KAW7	Eukaryotic translation initiation factor 4H	Eif4h	9	9	9	38.7	27.324	0	150.7	419970000	38					Intracellular	0.9345	Intracellular	0.7699	0.0001	0.23	4.86877	0	-4.05207	-3.63465	+		+	12335700	NA	652091	NA	4	0	6	9	14	9	0	0	0	0	0	106430000	94425000	118680000	99021000	0	1411700
Q07205	Eukaryotic translation initiation factor 5	Eif5	5	5	5	15.9	48.954	0	10.165	306660000	25					Intracellular	0.5036	Intracellular	0.9527	0	0.0473	4.26409	0	-3.35387	-2.9634	+		+	8975300	NA	936184	NA	4	0	3	6	9	7	0	0	0	0	0	60725000	84962000	96371000	64599000	0	0
Q3T1J1;G3V7J7	Eukaryotic translation initiation factor 5A-1	Eif5a	13	13	13	78.6	16.832	0	323.31	1563400000	82					UPS	0.614	Intracellular	0.9236	0.0001	0.0763	2.47195	0.000162084	-3.98069	-2.41341	+		+	39568000	5195630	8566940	5096400	4	3	21	18	19	18	0	1	3	0	2	381230000	332200000	468910000	331400000	1247600	10620000
A0A0H2UHV4;M0R7Z0;B2GUV7	Eukaryotic translation initiation factor 5B	Eif5b	4	4	4	7.2	136.41	0	29.06	92070000	17					Intracellular	0.5877	Intracellular	0.9506	0.0001	0.0493	2.90596	0.000361217	-1.90897	-1.68346	+		+	2714780	NA	519860	NA	4	0	4	2	8	3	0	0	0	0	0	22385000	16812000	27988000	24885000	0	0
A0A0G2K110;Q3KRD8	Eukaryotic translation initiation factor 6	Eif6	5	5	5	46.7	26.727	0	19.709	181540000	22					Intracellular	0.541	Intracellular	0.8441	0.0005	0.1554	4.95093	0	-3.04116	-2.9562	+		+	5145030	NA	541296	NA	4	0	6	5	7	3	0	0	0	0	1	33378000	52023000	56057000	34648000	0	0
Q80U96	Exportin-1	Xpo1	16	16	16	25.4	123.04	0	38.503	406790000	56					UPS	0.5208	Intracellular	0.8744	0.0001	0.1255	2.22444	0.000342159	-2.61562	-1.83012	+		+	10202900	3072500	2471010	342947	4	2	12	14	16	9	0	3	1	0	1	105800000	71891000	119510000	93020000	0	10452000
Q9Z1X1	Extended synaptotagmin-1	Esyt1	25	25	3	35.1	121.16	0	323.31	1176700000	98		+			Transmembrane	0.731	Transmembrane	0.0769	0.1921	0.731	5.52447	0	-5.34149	-4.7662	+		+	33076200	NA	5396730	NA	4	0	25	27	30	16	0	0	0	0	0	266410000	327170000	399610000	181440000	0	2052300
Q04931	FACT complex subunit SSRP1	Ssrp1	6	6	6	14	80.914	0	12.946	93963000	23					Intracellular	0.7904	Intracellular	0.9921	0.0002	0.0077	3.41044	0.000208955	-2.51095	-2.17759	+		+	2780520	NA	212041	NA	4	0	2	8	3	10	0	0	0	0	0	15310000	22350000	18396000	36789000	0	0
B2GUZ5	F-actin-capping protein subunit alpha-1	Capza1	11	9	9	66.4	32.909	0	105.44	1082800000	43					UPS	0.5737	Intracellular	0.9199	0	0.08	1.78556	0.000378863	-3.08193	-1.77777	+		+	28841800	10395000	2356610	168284	4	2	13	5	9	10	0	4	2	0	0	267700000	278580000	238830000	255040000	0	18847000
Q3T1K5	F-actin-capping protein subunit alpha-2	Capza2	13	13	11	70.3	32.967	0	323.31	1911700000	109					UPS	0.6191	Intracellular	0.9285	0	0.0715	1.29257	0.000822064	-3.30181	-1.53051	+		+	50029000	13145200	5761990	3402920	4	3	22	24	28	22	0	4	4	0	5	423920000	497760000	474090000	443790000	0	15609000
Q5XI32;A0A0G2JYB1	F-actin-capping protein subunit beta	Capzb	16	16	16	77.2	30.628	0	194.42	2516100000	76					UPS	0.552	Intracellular	0.9719	0	0.028	1.47301	0.000586815	-3.16429	-1.61936	+		+	68050700	17151700	8906010	5508040	4	3	19	14	18	16	0	5	1	0	3	600940000	688680000	632020000	463220000	0	59757000
A0A140TAJ3;Q32PX7	Far upstream element-binding protein 1	Fubp1	3	3	3	9	67.531	0	6.5957	107880000	4					Intracellular	0.7124	Intracellular	0.9777	0.0001	0.0222	0.714628	0.0345795	-1.15795	-0.728412	+		+	3291900	NA	987297	NA	3	0	0	1	1	2	0	0	0	0	0	23212000	17752000	35170000	31749000	0	0
A0A0G2K2B3;M0R961;Q99PF5	Far upstream element-binding protein 2	Khsrp	11	11	11	26.6	76.748	0	110.11	705610000	56					Intracellular	0.6977	Intracellular	0.6504	0.0043	0.3453	2.93187	0	-5.73518	-3.20071	+		+	20854800	NA	2818080	NA	4	0	15	16	11	14	0	0	0	0	0	175330000	206770000	165880000	157630000	0	0
F1LND7;A0A0G2JXT3;Q7TPK0;P05369	Farnesyl pyrophosphate synthase	Fdps	6	6	6	31.7	40.803	0	48.468	448770000	30	+			+	Intracellular	0.5327	Intracellular	0.9939	0	0.006	0.614377	0.0304041	-1.41494	-0.747513	+		+	9300550	7054300	3494680	1434800	4	3	3	7	10	3	0	2	2	1	2	70211000	118130000	180240000	47375000	0	12049000
A0A0G2JTA0;Q5BK32	FAS-associated factor 2	Faf2	8	8	8	30.6	52.46	0	71.966	275420000	35					Intracellular	0.9306	Intracellular	0.9549	0	0.0451	4.87112	0	-3.43485	-3.22026	+		+	8071750	NA	637219	NA	4	0	9	6	8	12	0	0	0	0	0	72886000	68098000	71142000	63295000	0	0
P85845	Fascin	Fscn1	13	13	3	41.2	54.49	0	65.791	589160000	51					Intracellular	0.5474	Intracellular	0.8278	0.0348	0.1374	0.835592	0.0215589	-1.25265	-0.808042	+		+	13892900	8034900	7440850	2675590	4	3	10	7	13	15	0	1	0	0	5	81483000	55445000	223810000	173400000	5063600	7590400
P12785	Fatty acid synthase;[Acyl-carrier-protein] S-acetyltransferase;[Acyl-carrier-protein] S-malonyltransferase;3-oxoacyl-[acyl-carrier-protein] synthase;3-oxoacyl-[acyl-carrier-protein] reductase;3-hydroxyacyl-[acyl-carrier-protein] dehydratase;Enoyl-[acyl-carrier-protein] reductase;Oleoyl-[acyl-carrier-protein] hydrolase	Fasn	51	51	51	35.2	272.65	0	310.71	2068900000	205					Intracellular	0.5496	Intracellular	0.9992	0	0.0008	3.18799	0.000109589	-4.18289	-2.89111	+		+	57952200	5048570	9688620	2396480	4	3	45	50	65	30	0	8	5	0	2	469410000	513680000	652390000	392940000	0	22826000
P55053	Fatty acid-binding protein, epidermal	Fabp5	9	9	9	61.5	15.059	0	68.081	1030500000	39					UPS	0.6368	Intracellular	0.9124	0.0004	0.0872	0.368925	0.108975	-1.23786	-0.548863				20843000	25344700	3258280	12673900	4	3	4	7	7	9	0	3	1	0	8	225110000	184700000	240850000	184990000	0	33522000
P07483	Fatty acid-binding protein, heart	Fabp3	2	2	2	17.3	14.775	0	5.1259	98082000	17					UPS	0.6368	Intracellular	0.9733	0.0001	0.0266	0.53142	0.0677375	-1.08772	-0.622841				2190070	3375800	688027	NA	3	1	4	2	3	2	0	4	1	0	1	25639000	24600000	18349000	12032000	0	10161000
F1LYQ8	FERM, RhoGEF and pleckstrin domain-containing protein 1	Farp1	10	10	10	15.9	118.84	0	31.067	201880000	24					Intracellular	0.5676	Intracellular	0.8129	0.0019	0.1852	3.10115	0.000203144	-2.59082	-2.13065	+		+	5217050	NA	1663740	NA	4	0	4	3	13	4	0	0	0	0	0	38105000	30844000	113140000	17893000	0	0
P02793;Q7TP54;M0R6L9;M0R5T8;M0R597;F1M5T1;M0RCS3;D4ADM5	Ferritin light chain 1;Protein FAM65B;Ferritin	Ftl1;Fam65b;RGD1560687;RGD1566189;LOC100362384;LOC100359668	11	11	11	73.8	20.748	0	236.61	1575600000	79					UPS	0.5446	Intracellular	0.7365	0.001	0.2625	0.462419	0.0977007	-1.01363	-0.566681				32444000	32031700	8067330	13460800	4	3	14	12	16	11	0	11	6	0	9	288130000	356620000	264930000	452230000	0	119360000
A0A0H2UHR7;D3ZHA0	Filamin-C	Flnc	79	66	66	43.7	287.3	0	323.31	7376800000	314					Intracellular	0.5009	Intracellular	0.9376	0.0001	0.0623	1.5607	0.000535316	-2.97211	-1.62723	+		+	189925000	42022700	33037300	38061300	4	4	81	67	67	65	0	15	14	0	5	1660700000	1856500000	2372200000	1146300000	0	167660000
Q9Z1E1;A0A0G2JU52	Flotillin-1	Flot1	9	9	9	31.8	47.499	0	18.261	191190000	22					Intracellular	0.6015	Intracellular	0.9004	0.0002	0.0994	3.10215	0.000150134	-2.91541	-2.29942	+		+	5730150	NA	2112420	NA	4	0	4	6	4	8	0	0	0	0	0	44807000	72135000	21318000	52930000	0	0
Q5XIW9;A0A0G2JXA8;Q9Z2S9	Flotillin-2	Flot2	7	7	7	29.1	38.717	0	18.858	324370000	29					UPS	0.5296	Intracellular	0.9414	0.0006	0.058	3.66875	0.000101449	-3.44674	-2.79103	+		+	9580720	NA	1701230	NA	4	0	8	8	7	6	0	0	0	0	0	74233000	89169000	81856000	79107000	0	0
A0A0G2KAT5;O35346	Focal adhesion kinase 1	Ptk2	3	3	3	6.2	121.03	0	12.762	42994000	8					Intracellular	0.5474	Intracellular	0.9094	0.003	0.0876	0.0473305	0.825405	-0.107849	-0.0675453				1416770	NA	247526	NA	3	0	2	1	2	3	0	0	0	0	0	9397300	13368000	8103200	12125000	0	0
Q6P792;Q9WUH4;A0A0G2K338;Q8K3G3	Four and a half LIM domains protein 1	Fhl1	14	14	14	53.4	33.578	0	45.739	4480000000	83					UPS	0.6365	Intracellular	0.9409	0	0.0591	1.25033	0.0024	-1.79688	-1.15111	+		+	110513000	37881300	44110100	27131400	4	4	18	18	22	11	0	6	7	0	1	1379300000	1348100000	1009800000	362320000	0	181290000
O35115	Four and a half LIM domains protein 2	Fhl2	11	11	11	55.2	32.086	0	106.16	824600000	46					UPS	0.6359	Intracellular	0.949	0	0.051	5.92651	0	-5.52898	-5.10154	+		+	24186000	NA	2743770	NA	4	0	9	11	10	16	0	0	0	0	0	157570000	167070000	213000000	276880000	0	1602800
Q5XI81;A0A0G2JWD2	Fragile X mental retardation syndrome-related protein 1	Fxr1	6	4	4	12.1	63.947	0	9.9633	143460000	18					Intracellular	0.8798	Intracellular	0.9397	0	0.0602	3.81696	8.7e-05	-2.88362	-2.52454	+		+	4184650	NA	476338	NA	4	0	3	5	6	4	0	0	0	0	0	39756000	21517000	54177000	28013000	0	0
P05065;Q6AY07	Fructose-bisphosphate aldolase A	Aldoa	25	25	23	79.7	39.351	0	323.31	12500000000	284					Intracellular	0.5681	Intracellular	0.9575	0	0.0425	0.41727	0.232291	-0.561944	-0.40237				270362000	216411000	46714600	108998000	4	4	57	43	44	48	0	29	30	7	26	2780200000	2760700000	2820000000	1748600000	0	859960000
P14408;Q5M964	Fumarate hydratase, mitochondrial	Fh	16	16	16	49.1	54.463	0	130.67	1113400000	49					Intracellular	0.5003	Intracellular	0.9048	0.0004	0.0947	3.64696	0	-5.15676	-3.54018	+		+	32110500	2789300	11433600	NA	4	1	9	12	14	14	0	0	0	0	0	291770000	295080000	298340000	221840000	3657700	2730300
B2RYW9	Fumarylacetoacetate hydrolase domain-containing protein 2	Fahd2	5	5	5	31.9	34.581	0	16.74	196580000	20					UPS	0.5728	Intracellular	0.8166	0.0049	0.1785	3.14215	0.000162791	-3.13113	-2.41999	+		+	5874850	NA	2286700	NA	4	0	8	3	4	5	0	0	0	0	0	44567000	47233000	38720000	66058000	0	0
P11762	Galectin-1	Lgals1	12	12	12	95.6	14.857	0	323.31	16300000000	153					UPS	0.6129	Intracellular	0.9578	0	0.0422	1.61594	0.00452323	-1.28329	-1.04442	+		+	395200000	170982000	106221000	67454000	4	4	31	28	32	20	0	10	9	8	15	3472300000	3387600000	5007600000	2621800000	6149200	548270000
P07323	Gamma-enolase	Eno2	14	11	10	55.1	47.14	0	115.63	624570000	48					UPS	0.5022	Intracellular	0.9501	0	0.0498	0.746378	0.012215	-1.79881	-0.906926	+		+	14394700	9113460	3900160	2221370	4	3	13	11	10	3	0	4	3	0	4	160640000	172460000	162080000	76318000	0	22070000
A0A0G2K4T7;Q5U2Y1	General transcription factor II-I	Gtf2i	4	4	4	8.8	112.31	0	22.16	82384000	23					Intracellular	0.5668	Intracellular	0.9828	0.0018	0.0154	1.13245	0.0303127	-0.915417	-0.748435	+		+	2404930	NA	455673	NA	4	0	7	5	7	4	0	0	0	0	0	18189000	30189000	23222000	10784000	0	0
P41542	General vesicular transport factor p115	Uso1	20	20	20	36.2	107.16	0	130	1221200000	65					Intracellular	0.5452	Intracellular	0.885	0.0001	0.1149	2.66615	9.57e-05	-4.46422	-2.67284	+		+	34413500	3720400	17847800	44124.3	4	2	19	15	18	12	0	0	1	0	0	271870000	275120000	420340000	239580000	0	8625900
Q6AZ83	Glucose-6-phosphatase 3	G6pc3	4	4	4	21.4	38.833	0	11.085	113240000	21		+			Transmembrane	0.8483	Transmembrane	0.0768	0.0749	0.8483	1.55343	0.00151585	-1.72156	-1.23213	+		+	3381700	NA	794760	NA	4	0	8	5	4	4	0	0	0	0	0	36095000	24877000	21507000	30757000	0	0
P05370	Glucose-6-phosphate 1-dehydrogenase	G6pdx	18	18	18	48.7	59.375	0	42.214	752020000	52					Intracellular	0.5486	Intracellular	0.8987	0.0098	0.0915	2.08602	0.000216216	-4.21361	-2.23304	+		+	21102500	3437150	9917950	638304	4	2	10	10	16	12	0	1	2	0	1	203820000	111270000	262010000	158860000	0	5238400
Q6P6V0;CON__Q3ZBD7	Glucose-6-phosphate isomerase	Gpi	16	16	16	44.3	62.826	0	85.8	1969400000	124					UPS	0.5215	Intracellular	0.8769	0	0.1231	0.420665	0.208223	-0.615976	-0.424933				42218000	32955000	10504900	17591900	4	4	30	18	24	19	0	16	7	1	9	371080000	389410000	527100000	343870000	0	111740000
B2RYC9	Glucosylceramidase	Gba	10	10	10	34.4	57.491	0	66.939	432400000	38	+			+	Signal-peptide	0.8883	Signal-peptide	0.0331	0.8883	0.0787	2.53556	0.000220762	-3.42555	-2.26949	+		+	12137300	3907500	4510040	NA	4	1	11	8	6	13	0	0	0	0	0	105880000	116540000	87970000	117160000	0	4853800
P10860	Glutamate dehydrogenase 1, mitochondrial	Glud1	27	27	27	60.6	61.415	0	256.9	7744400000	206					Intracellular	0.5681	Intracellular	0.5948	0.2385	0.1667	4.07178	0	-6.72695	-4.4276	+		+	224204000	4116600	87893000	2423680	4	2	55	54	39	55	0	2	0	0	1	2290000000	2448400000	959350000	2015500000	0	22649000
P19468	Glutamate--cysteine ligase catalytic subunit	Gclc	6	6	6	13.8	72.618	0	16.678	53033000	17					Intracellular	0.5823	Intracellular	0.9003	0.0008	0.099	0.104573	0.637796	-0.232739	-0.143692				1705430	NA	235497	NA	3	0	5	3	0	6	0	3	0	0	0	14668000	11856000	0	15283000	0	5017100
P13264;A0A0G2K1T0;A0A0G2KAN7	Glutaminase kidney isoform, mitochondrial;Glutaminase kidney isoform 68 kDa chain;Glutaminase kidney isoform 65 kDa chain	Gls	21	21	21	43.2	74.023	0	323.31	1807100000	90					Intracellular	0.5689	Intracellular	0.9655	0.0301	0.0044	5.0018	0	-7.05573	-5.34467	+		+	53135000	NA	7763470	NA	4	0	24	24	20	22	0	0	0	0	0	463900000	542850000	405620000	394690000	0	0
A0A0G2KB56;P82808;Q4KMC4	Glutamine--fructose-6-phosphate aminotransferase [isomerizing] 1	Gfpt1	7	7	7	17	78.918	0	24.938	120450000	23					Intracellular	0.5683	Intracellular	0.958	0.0001	0.0419	5.59493	0.000148344	-2.09916	-2.27524	+		+	3498700	NA	388484	NA	4	0	3	4	6	10	0	0	0	0	0	24562000	19495000	49929000	26468000	0	0
Q9JLZ1;A0A0G2K5P8	Glutaredoxin-3	Glrx3	9	9	9	51	37.849	0	40.913	415170000	55					UPS	0.6191	Intracellular	0.6522	0.0289	0.3189	1.0608	0.0140526	-1.24417	-0.883249	+		+	9893450	6157330	2174490	677030	4	3	12	10	5	11	0	7	4	2	4	94235000	100850000	67421000	105120000	0	13940000
D3ZQI1	Glutathione peroxidase	Gpx7	5	5	5	42.5	21.089	0	29.461	950810000	43	+			+	Signal-peptide	0.9075	Signal-peptide	0.0389	0.9075	0.0536	5.32211	0	-5.67641	-4.85613	+		+	27537500	NA	5276880	NA	4	0	9	9	11	13	0	1	0	0	0	173870000	249780000	349710000	174480000	0	2966000
M0RAM5;P04041	Glutathione peroxidase 1	Gpx1	8	8	8	45.5	22.155	0	18.262	176200000	18					UPS	0.5492	Intracellular	0.7757	0.0647	0.1596	2.8866	0.000189402	-2.49412	-2.01123	+		+	5005400	NA	1382630	NA	4	0	4	5	8	1	0	0	0	0	0	28870000	45049000	83469000	17803000	0	1011000
P04904;A0A0G2JVT2;F7F2H5;Q4FZZ3;P04903;P00502;A0A0G2K8Q5;A0A0G2JTB1;P46418;D3ZD94;Q6AXY0;P14942	Glutathione S-transferase alpha-3	Gsta3	7	7	7	51.1	25.319	0	20.825	762700000	28					UPS	0.5493	Intracellular	0.9323	0.0005	0.0672	0.627264	0.0388162	-1.23337	-0.710259	+		+	20351800	10918900	11878000	2100230	4	3	4	7	2	9	0	4	0	0	2	237890000	225910000	20467000	178210000	0	49337000
P08010;A0A0G2K4U2;A0A0G2K6L4;A0A0G2JZ09	Glutathione S-transferase Mu 2	Gstm2	15	15	7	67.4	25.702	0	47.112	1793500000	99					UPS	0.5728	Intracellular	0.9074	0.0159	0.0767	0.873797	0.00824791	-1.7313	-0.962486	+		+	40259300	24093000	6717940	5851260	4	3	18	24	17	23	0	5	4	1	7	408310000	354110000	469170000	433690000	1265100	35202000
Q9Z1B2	Glutathione S-transferase Mu 5	Gstm5	3	2	2	16.9	26.629	0	87.074	103100000	12					UPS	0.5736	Intracellular	0.888	0.0087	0.1033	2.10038	0.000855124	-1.97348	-1.51184	+		+	3047530	NA	1817930	NA	4	0	1	3	3	3	0	0	0	0	2	21164000	25117000	15630000	39360000	0	0
P04906;Q7TP35	Glutathione S-transferase P	Gstp1	8	8	8	57.1	23.439	0	323.31	3518400000	140					UPS	0.6168	Intracellular	0.8297	0.0018	0.1685	0.463025	0.0377687	-1.88369	-0.714764	+		+	79483000	73133400	25199700	9210510	4	3	31	32	14	23	0	16	12	2	10	893920000	925050000	484310000	605300000	0	231260000
P46413	Glutathione synthetase	Gss	10	10	10	42.4	52.344	0	92.429	192330000	53					Intracellular	0.5686	Intracellular	0.9883	0.0004	0.0113	0.735302	0.0294023	-1.21333	-0.754476	+		+	4405450	3206970	1438420	1585860	4	3	9	5	15	13	0	5	1	0	5	38759000	16236000	66063000	50428000	0	6104000
P04797;D3ZGY4;M0R590;M0R660;E9PTN6;E9PTV9;A0A0G2K8S2;A0A0G2K7M1;D3ZWV2;F1LUI2;Q9ESV6;D3ZQT0;F1M2N4;B1WBQ8;F1M4G6;D3ZME3;F1M269;Q498M9;D3ZEN2;A0A0G2JYY8	Glyceraldehyde-3-phosphate dehydrogenase	Gapdh;Gapdh-ps2;LOC685186;RGD1565368;RGD1564688	23	23	21	81.7	35.828	0	323.31	44800000000	507	+			+	UPS	0.5358	Intracellular	0.896	0.0282	0.0758	2.30454	0.000204878	-3.42194	-2.15035	+		+	1066750000	133688000	204226000	87359100	4	4	110	121	129	89	0	24	16	4	14	11700000000	10600000000	14100000000	6985700000	1303400	583530000
G3V7G8;Q5I0G4	Glycine--tRNA ligase	Gars	26	26	26	49	81.792	0	100.25	2268100000	121					Intracellular	0.5682	Intracellular	0.7269	0.1791	0.0939	1.03696	0.00152174	-2.638	-1.2467	+		+	56801000	21958700	30925100	18346200	4	3	17	18	40	35	0	3	3	0	5	275160000	343880000	794330000	715240000	0	18878000
A2RRU1	Glycogen [starch] synthase, muscle	Gys1	10	10	10	27.1	84.071	0	37.943	368920000	47					Intracellular	0.7052	Intracellular	0.913	0.0001	0.087	3.30514	8.25e-05	-3.02888	-2.43204	+		+	10784700	NA	758906	NA	4	0	10	15	10	12	0	0	0	0	0	81379000	101680000	105110000	78952000	0	1800900
A0A0G2KB98;A0A0G2JSH4;P18266	Glycogen synthase kinase-3 beta	Gsk3b	2	2	2	12.3	48.01	0	12.747	68099000	4					Intracellular	0.7154	Intracellular	0.6787	0.0011	0.3202	0.476585	0.13467	-0.800082	-0.512454				2151130	NA	147695	NA	3	0	1	1	0	2	0	0	0	0	0	12939000	11596000	15808000	27756000	0	0
Q8K1Q0;F1M110	Glycylpeptide N-tetradecanoyltransferase 1;Glycylpeptide N-tetradecanoyltransferase	Nmt1;Nmt2	4	4	4	10.7	56.86	0.00044663	4.4421	68534000	8					UPS	0.5206	Intracellular	0.9933	0.0002	0.0065	0.730959	0.0251854	-1.30084	-0.77861	+		+	2419130	NA	322107	NA	3	0	1	1	5	1	0	0	0	0	0	20434000	4927400	36476000	6695900	0	0
Q5I0D1	Glyoxalase domain-containing protein 4	Glod4	7	7	7	34.6	33.267	0	12.632	225250000	18					UPS	0.5562	Intracellular	0.9472	0.0005	0.0523	0.41094	0.131171	-0.931816	-0.517149				4935750	5390370	625437	2421410	4	3	3	2	5	5	0	1	1	0	1	43536000	52194000	54524000	33086000	0	8300300
A0A0G2K2C2;Q4V7C6;A0A096MJK6;A0A096MJ75	GMP synthase [glutamine-hydrolyzing]	Gmps	5	5	5	16	77.859	0	34.701	80531000	22					Intracellular	0.5668	Intracellular	0.942	0.0001	0.0579	1.05063	0.0120382	-1.32503	-0.911555	+		+	2398750	NA	935607	NA	4	0	5	8	6	3	0	0	0	0	0	18741000	14816000	19587000	27386000	0	0
G3V8G5;Q62638	Golgi apparatus protein 1	Glg1	19	19	19	26.3	133.55	0	67.697	1071300000	67	+	+			Signal-peptide	0.9465	Signal-peptide	0.0009	0.9465	0.0526	4.91115	0	-5.69672	-4.61172	+		+	30988800	NA	4522140	NA	4	0	14	18	18	17	0	0	0	0	0	209160000	244140000	389490000	221020000	0	0
A0A0G2K571;D3ZM57;Q5BJK8	Golgi integral membrane protein 4	Golim4	11	11	11	20.5	80.557	0	73.771	611370000	37		+			Transmembrane	0.9807	Transmembrane	0.0008	0.0186	0.9807	5.4278	0	-4.1517	-3.92086	+		+	17529500	NA	4577130	NA	4	0	9	6	15	7	0	0	0	0	0	82759000	127080000	297090000	104450000	0	0
Q569C9;Q9ERE4;A0A0G2K9Q1;Q66H74	Golgi phosphoprotein 3	Golph3	3	3	3	17.8	33.752	0	5.4682	29512000	4					Transmembrane	0.5037	Transmembrane	0.48	0.0162	0.5037	0.758053	0.227898	0.442138	0.406691				870672	NA	163902	NA	4	0	1	0	2	1	0	0	0	0	0	7179300	7796000	7710600	6826300	0	0
B1WBR1;A0A0G2JWJ7;O35254	Golgi reassembly-stacking protein 1	Gorasp1	2	2	2	9	47.052	0	4.8361	97209000	4					Intracellular	0.6751	Intracellular	0.9688	0.0007	0.0305	0.744577	0.0384645	-1.07271	-0.711754	+		+	3353900	NA	987717	NA	3	0	0	2	1	1	0	0	0	0	0	35581000	17411000	34238000	9978400	0	0
Q68G33;F6T071;Q9R064	Golgi reassembly-stacking protein 2	Gorasp2	4	4	4	14.5	47.309	0	146.12	171300000	22					Intracellular	0.6942	Intracellular	0.8603	0	0.1397	6.04015	8.47e-05	-2.24345	-2.46487	+		+	4951450	NA	759923	NA	4	0	4	7	7	4	0	0	0	0	0	15397000	55610000	67159000	33136000	0	0
A0A0G2K756;G3V6E4;Q7TNY6	Golgi resident protein GCP60	Acbd3	8	8	8	31.9	60.319	0	58.413	226150000	28					Intracellular	0.6467	Intracellular	0.9525	0.0005	0.047	3.09125	9.38e-05	-3.67745	-2.63996	+		+	6530200	NA	1085130	NA	4	0	5	5	13	5	0	0	0	0	0	40818000	49022000	96990000	39316000	0	0
A0A140TAB6;A0A0G2K977;Q62839	Golgin subfamily A member 2	Golga2	5	5	5	11.5	111.45	0	49.6	51775000	16					Intracellular	0.5878	Intracellular	0.952	0.0001	0.0479	0.273151	0.431398	-0.319528	-0.248971				1701670	NA	783594	NA	3	0	4	2	6	4	0	0	0	0	0	8762200	8494200	13535000	20983000	0	0
P62994;Q63058	Growth factor receptor-bound protein 2	Grb2	3	3	3	25.3	25.206	0	31.58	65551000	11					UPS	0.5579	Intracellular	0.992	0	0.008	0.922308	0.0221105	-1.15028	-0.80211	+		+	1923330	NA	256576	NA	3	0	2	3	2	1	0	1	0	0	2	8881800	17875000	20363000	11754000	0	2414900
Q5XIA8	Growth hormone-inducible transmembrane protein	Ghitm	3	3	3	12.1	37.178	0.0011909	2.9454	174450000	4		+			UPS	0.6182	Intracellular	0.9198	0.0081	0.0722	1.25925	0.00233585	-1.80733	-1.15812	+		+	6029900	NA	1008310	NA	3	0	1	2	1	0	0	0	0	0	0	64661000	55390000	34443000	19958000	0	0
A0A0G2JZA2;P97576	GrpE protein homolog 1, mitochondrial	Grpel1	3	3	3	16.5	25.811	0	4.8639	133590000	10					UPS	0.593	Intracellular	0.9542	0.0004	0.0454	3.5607	0.000198113	-2.31813	-2.09596	+		+	3958050	NA	448035	NA	4	0	1	3	2	4	0	0	0	0	0	31545000	40553000	29089000	32401000	0	0
Q6P2A5;P29411	GTP:AMP phosphotransferase AK3, mitochondrial	Ak3	8	8	8	48	25.494	0	91.644	666340000	45					UPS	0.5728	Intracellular	0.9194	0.0149	0.0657	4.19535	0	-5.43808	-4.01905	+		+	19923000	NA	6297700	NA	4	0	16	10	8	11	0	0	0	0	0	173920000	220280000	95087000	177060000	0	0
Q04970;P20171;P08644	GTPase NRas;GTPase HRas;GTPase HRas, N-terminally processed;GTPase KRas;GTPase KRas, N-terminally processed	Nras;Hras;Kras	4	4	4	27.5	21.243	0	9.2486	212360000	5					UPS	0.5519	Intracellular	0.9284	0.003	0.0687	3.93347	0.000107075	-3.37196	-2.85397	+		+	6144620	NA	1006740	NA	4	0	1	2	2	0	0	0	0	0	0	52650000	66816000	58571000	31804000	0	0
P62828;Q66H11;Q8K586	GTP-binding nuclear protein Ran;GTP-binding nuclear protein Ran, testis-specific isoform	Ran;RGD1306195;Rasl2-9	11	11	11	46.8	24.423	0	32.115	3220600000	43					UPS	0.6221	Intracellular	0.9596	0.0002	0.0402	1.61895	0.000646209	-2.58281	-1.5547	+		+	81471500	23135700	32056300	8084450	4	3	10	5	14	13	0	0	1	0	0	750470000	876910000	856530000	662700000	0	27894000
Q9JKB7;Q9WTT6	Guanine deaminase	Gda	5	5	5	17.8	50.9	0	9.4975	108210000	12					UPS	0.5011	Intracellular	0.8804	0.0709	0.0487	2.77961	0.000291971	-2.27464	-1.8628	+		+	2926280	NA	711845	NA	4	0	5	1	1	3	0	1	0	0	1	22765000	15518000	24700000	35190000	0	2478400
P04897;Q5EEY3;P59215	Guanine nucleotide-binding protein G(i) subunit alpha-2	Gnai2	19	19	12	62.8	40.499	0	323.31	4124200000	132					Intracellular	0.5332	Intracellular	0.9705	0.0008	0.0287	2.48836	0.000370732	-2.1884	-1.73221	+		+	107424000	26086500	22070300	12160200	4	4	33	35	23	29	0	5	1	2	4	979830000	1260700000	847850000	787440000	0	99863000
P54311;P52287	Guanine nucleotide-binding protein G(I)/G(S)/G(T) subunit beta-1	Gnb1	16	16	10	68.5	37.377	0	301.74	4260400000	120					Intracellular	0.5984	Intracellular	0.9158	0.0003	0.0839	6.2633	0	-3.37567	-3.54581	+		+	117780000	11463400	11284700	2190910	4	4	26	23	28	28	0	5	4	3	3	1093400000	1083400000	1042700000	953750000	0	20904000
P54313	Guanine nucleotide-binding protein G(I)/G(S)/G(T) subunit beta-2	Gnb2	15	10	8	67.4	37.331	0	146.97	1649300000	67					Intracellular	0.6018	Intracellular	0.9174	0.0005	0.0821	1.81372	0.00019026	-4.06352	-2.01985	+		+	45240500	11171400	8235840	8149620	4	2	22	18	17	8	0	2	0	0	0	383970000	393000000	416240000	414830000	0	33975000
P08753	Guanine nucleotide-binding protein G(k) subunit alpha	Gnai3	14	8	8	52.8	40.522	0	227.45	375060000	36					Intracellular	0.5345	Intracellular	0.9826	0.0005	0.0169	2.17642	0.000190045	-3.20966	-2.01758	+		+	9998170	2789350	1102590	929914	4	2	11	8	6	9	0	2	0	0	0	88481000	101510000	99242000	78206000	0	3998800
D4AE68;P82471	Guanine nucleotide-binding protein G(q) subunit alpha	Gnaq	11	11	8	38.2	42.158	0	40.997	480900000	47					Intracellular	0.9236	Intracellular	0.9994	0.0003	0.0003	1.85841	0.000535814	-2.4759	-1.62846	+		+	12691900	3654800	2904060	948932	4	3	13	8	8	10	0	3	2	0	3	105300000	133480000	93505000	128110000	0	8441300
P63095;Q63803;M0R9J4;A0A0G2JWA1;D3ZSS5;D4AA42;G3V8E8;A0A0G2K526;P29348;P38406	Guanine nucleotide-binding protein G(s) subunit alpha isoforms short;Guanine nucleotide-binding protein G(s) subunit alpha isoforms XLas	Gnas	10	9	9	35.8	45.663	0	51.559	457210000	43					Intracellular	0.8717	Intracellular	0.9627	0	0.0372	3.26835	8.96e-05	-3.32712	-2.5652	+		+	12822600	2712000	3075420	NA	4	1	12	11	9	9	0	1	0	1	0	101120000	106480000	157480000	85855000	0	4270200
G3V6Q6;Q9JID2	Guanine nucleotide-binding protein subunit alpha-11	Gna11	8	6	4	26.7	42.044	0	19.519	141730000	21					Intracellular	0.6687	Intracellular	0.9993	0.0006	0.0001	3.6421	0.000207921	-2.40055	-2.1699	+		+	4111880	NA	192443	NA	4	0	7	5	4	5	0	0	0	0	0	40828000	37218000	33348000	27787000	0	2127500
P63245;A0A0G2JZE6;A0A0G2JY24	Guanine nucleotide-binding protein subunit beta-2-like 1;Guanine nucleotide-binding protein subunit beta-2-like 1, N-terminally processed	Gnb2l1	20	20	20	87.7	35.076	0	323.31	6290000000	164					UPS	0.601	Intracellular	0.8676	0.0001	0.1323	1.42331	0.000340081	-4.55065	-1.81055	+		+	170258000	23824300	23909900	4207380	4	3	41	33	34	39	0	4	7	0	6	1348600000	1500000000	1964100000	1332500000	0	40215000
P40615;A0A0G2K700	H/ACA ribonucleoprotein complex subunit 4	Dkc1	3	3	3	11.4	56.614	0	6.6112	78882000	5					Intracellular	0.8798	Intracellular	0.982	0	0.018	0.442181	0.15481	-0.765267	-0.486044				2782770	NA	936929	NA	3	0	0	1	1	3	0	0	0	0	0	9496800	6845800	19254000	43286000	0	0
A0A0G2K2P6;Q6AXM7	HBS1-like protein	Hbs1l	5	5	5	11.9	74.799	0	8.245	98976000	10					Intracellular	0.5201	Intracellular	0.8751	0	0.1249	0.860092	0.0182293	-1.3061	-0.835346	+		+	3385230	NA	794496	NA	3	0	1	0	2	7	0	0	0	0	0	10448000	8188700	66963000	13376000	0	0
Q7TSE9;A0A096MJ14;M0RC50;M0R639	HCLS1-associated protein X-1	Hax1	2	2	2	6.8	31.448	0.00041667	3.509	12422000	7					Intracellular	0.9343	Intracellular	0.9017	0.0032	0.0951	0.376546	0.34341	0.382126	0.307747				408827	NA	144613	NA	3	0	1	2	2	2	0	0	0	0	0	2070700	3940200	2450200	3960500	0	0
P0DMW1;P0DMW0	Heat shock 70 kDa protein 1B;Heat shock 70 kDa protein 1A	Hspa1a	17	14	10	37.9	70.184	0	35.404	685460000	48					Intracellular	0.7166	Intracellular	0.8642	0.0004	0.1353	2.37615	0.000208178	-3.37984	-2.17362	+		+	18593300	3953700	6643200	306462	4	2	12	16	11	6	0	3	0	0	0	195570000	212720000	197430000	69382000	0	6148700
F1LRV4;O88600;F7F2F3	Heat shock 70 kDa protein 4	Hspa4	25	25	24	43.2	94.025	0	192.28	1699700000	109					Intracellular	0.6614	Intracellular	0.8436	0.0253	0.1311	2.18843	0.000247788	-3.01426	-1.95955	+		+	47050000	9798130	6673250	3430030	4	3	27	26	23	22	0	5	3	0	3	372960000	391730000	448350000	410600000	0	23582000
P63018;M0RCB1;D4A4S3;F1LZI1;M0R8M9;A0A0G2JVI3	Heat shock cognate 71 kDa protein	Hspa8;LOC102549957;LOC680121	40	38	29	71.4	70.87	0	323.31	22900000000	400					Intracellular	0.6623	Intracellular	0.8898	0.0002	0.1101	1.96016	0.000827957	-2.13528	-1.53819	+		+	582590000	158712000	55217100	81454700	4	4	65	78	74	75	0	39	20	17	32	4703300000	6022800000	6110600000	4353300000	7178000	570970000
Q66HA8	Heat shock protein 105 kDa	Hsph1	16	15	15	27.6	96.417	0	81.543	546470000	66					Intracellular	0.6639	Intracellular	0.7961	0.0044	0.1995	6.66209	0	-4.29372	-4.44628	+		+	16005000	NA	1547750	NA	4	0	14	18	16	18	0	0	0	0	0	133880000	146500000	165900000	100190000	0	0
Q5XHZ0	Heat shock protein 75 kDa, mitochondrial	Trap1	11	11	11	23.2	80.46	0	108.03	654600000	58					Intracellular	0.5691	Intracellular	0.8311	0.1467	0.0222	4.02981	0	-4.52202	-3.50035	+		+	19462000	NA	3578550	NA	4	0	11	23	14	10	0	0	0	0	0	164600000	211840000	119840000	158310000	0	0
G3V913;P42930	Heat shock protein beta-1	Hspb1	14	13	13	90.3	22.807	0	184.15	4204400000	105					Intracellular	0.9343	Intracellular	0.9636	0	0.0363	1.92361	0.000208437	-4.4794	-2.17641	+		+	117236000	12726200	39647400	7152960	4	3	25	27	17	17	0	9	5	0	5	1106200000	1370000000	1030000000	594130000	0	49855000
P82995;D3ZXC7	Heat shock protein HSP 90-alpha	Hsp90aa1	41	30	30	57.4	84.814	0	323.31	6376600000	270					Intracellular	0.5817	Intracellular	0.8864	0	0.1136	1.23626	0.00173672	-2.02883	-1.21637	+		+	159010000	55072100	10228300	33611700	4	4	46	50	62	72	0	17	8	3	12	1354700000	1528400000	1616100000	1314400000	0	247690000
P34058;A0A0G2K793	Heat shock protein HSP 90-beta	Hsp90ab1	42	40	29	63.5	83.28	0	323.31	20700000000	464					Intracellular	0.504	Intracellular	0.9424	0	0.0575	1.87877	0.000338028	-2.98038	-1.79799	+		+	579890000	103426000	34612200	63796800	4	4	87	92	99	92	0	28	27	7	32	4291900000	4618900000	5630300000	4380000000	2036900	580070000
A0A140TAH1;Q9JJ50	Hepatocyte growth factor-regulated tyrosine kinase substrate	Hgs	4	4	4	10.7	101.12	0	31.352	203830000	16					Intracellular	0.7357	Intracellular	0.834	0.0023	0.1638	3.10585	0.000200717	-2.54826	-2.10894	+		+	5243630	NA	1786620	NA	4	0	3	3	3	7	0	0	0	0	0	33883000	50021000	24761000	65670000	0	9921100
F1M6V1;Q6P747;A0A096MKG6;A0A096MJ10	Heterochromatin protein 1-binding protein 3	Hp1bp3	7	7	7	21.3	60.985	0	15.166	79572000	17					Intracellular	0.6221	Intracellular	0.9858	0.0111	0.0031	2.40961	0.000368932	-2.22835	-1.72767	+		+	3101670	NA	432119	NA	3	0	4	4	2	7	0	0	0	0	0	32638000	23759000	3165300	20010000	0	0
Q6P6G9;Q5I0M7;P04256;A0A0G2K3G4;D4ACJ7;F1M2S4;F1M6C7	Heterogeneous nuclear ribonucleoprotein A1;Heterogeneous nuclear ribonucleoprotein A1, N-terminally processed	Hnrnpa1;Hnrpa1	13	13	13	37.7	33.619	0	66.852	899390000	53		+			Intracellular	0.9344	Intracellular	0.9985	0.0009	0.0006	5.0894	0	-4.45545	-3.98768	+		+	26207200	NA	6218050	NA	4	0	6	9	18	19	0	1	0	0	0	149850000	223310000	275980000	244670000	0	4160000
Q6URK4	Heterogeneous nuclear ribonucleoprotein A3	Hnrnpa3	17	17	5	43.8	39.652	0	323.31	2005700000	86					Intracellular	0.9343	Intracellular	0.9905	0.0004	0.0092	5.40886	0	-6.28409	-5.25973	+		+	59221200	NA	4038390	NA	4	0	22	23	17	23	0	0	0	0	1	504790000	442030000	530340000	525200000	0	0
A0A0G2K7B3;A0A140TAI3;G3V9R8	Heterogeneous nuclear ribonucleoprotein C	Hnrnpc	7	7	2	28	33.056	0	17.184	440040000	25					Intracellular	0.7183	Intracellular	0.991	0	0.009	4.07634	0	-3.93645	-3.2262	+		+	12498500	NA	1570970	NA	4	0	5	9	6	5	0	0	0	0	0	107060000	115620000	125310000	89086000	0	849350
Q9JJ54;M0R9X3	Heterogeneous nuclear ribonucleoprotein D0	Hnrnpd	6	6	5	20.1	38.218	0	65.48	496660000	28					Intracellular	0.637	Intracellular	0.7966	0.0058	0.1976	4.35313	0.000108949	-3.16525	-2.87208	+		+	14627000	NA	448043	NA	4	0	7	7	7	7	0	0	0	0	0	122700000	118850000	136470000	118010000	0	0
A0A0G2KAZ7;Q3SWU3	Heterogeneous nuclear ribonucleoprotein D-like	Hnrnpdl	4	2	2	14.6	46.307	0.0030936	2.7146	71237000	4					Intracellular	0.9347	Intracellular	0.9691	0.0025	0.0284	2.2661	0.00274609	-1.23033	-1.12882	+		+	2103320	NA	144643	NA	4	0	1	1	1	1	0	0	0	0	0	16044000	19915000	18034000	17244000	0	0
Q794E4	Heterogeneous nuclear ribonucleoprotein F;Heterogeneous nuclear ribonucleoprotein F, N-terminally processed	Hnrnpf	12	10	10	54.5	45.729	0	105.75	630570000	50					Intracellular	0.7171	Intracellular	0.8454	0.0001	0.1545	3.68674	0	-4.57633	-3.33266	+		+	18551200	NA	2510920	NA	4	0	12	14	12	12	0	0	0	0	0	151550000	152090000	167930000	156700000	0	1432400
A0A0G2JTG7;G3V9Q3;Q8VHV7;Q499R8	Heterogeneous nuclear ribonucleoprotein H;Heterogeneous nuclear ribonucleoprotein H, N-terminally processed	Hnrnph1	12	12	6	42.5	49.199	0	323.31	1635900000	52					Intracellular	0.7884	Intracellular	0.884	0	0.116	4.23068	0	-5.4183	-4.03372	+		+	47423700	2125700	18039500	NA	4	1	13	7	19	11	0	1	0	0	1	333300000	371790000	544470000	383000000	0	3295000
Q6AY09	Heterogeneous nuclear ribonucleoprotein H2	Hnrnph2	10	5	5	39.2	49.293	0	16.118	166510000	24					Intracellular	0.7884	Intracellular	0.8683	0	0.1316	4.33578	8.51e-05	-2.59703	-2.47434	+		+	4948920	NA	1427160	NA	4	0	4	9	7	4	0	0	0	0	0	57622000	39310000	34174000	35402000	0	0
P61980;Q5D059;M0R9K1	Heterogeneous nuclear ribonucleoprotein K	Hnrnpk;LOC100359916	22	22	22	58.7	50.976	0	323.31	3817900000	138					Intracellular	0.9344	Intracellular	0.9757	0	0.0243	2.42079	0.000105461	-6.01251	-2.84342	+		+	108106000	4572100	20582300	2883710	4	3	37	25	39	26	0	4	2	0	5	836980000	809140000	1143200000	994430000	0	7134900
F1M3D3;F1LV13;Q62826;A0A0G2JVD4	Heterogeneous nuclear ribonucleoprotein M	Hnrnpm	12	12	12	32.1	77.629	0	44.383	1006400000	47					Intracellular	0.7676	Intracellular	0.9148	0.0004	0.0848	4.68966	0	-5.63465	-4.43654	+		+	29445000	NA	3723950	NA	4	0	13	11	14	9	0	0	0	0	0	269490000	249440000	242140000	245350000	0	0
M0R735;A0A0G2K9J1;Q7TP47	Heterogeneous nuclear ribonucleoprotein Q	Syncrip	14	14	10	34.5	62.672	0	45.592	5188300000	52					Intracellular	0.7195	Intracellular	0.9501	0.0001	0.0498	0.258395	0.164332	-1.53442	-0.474548				40977000	255240000	9947690	51265400	4	2	11	15	10	13	0	2	0	0	1	262330000	264610000	369780000	256810000	1335700000	578170000
F1LNF1;F1LM82;A7VJC2	Heterogeneous nuclear ribonucleoproteins A2/B1	Hnrnpa2b1	19	19	19	58.2	37.297	0	323.31	3577100000	108					Intracellular	0.7056	Intracellular	0.931	0.0003	0.0687	3.46253	0	-4.06093	-2.98902	+		+	95759300	8147900	23576300	2084830	4	3	20	26	35	22	0	2	1	0	2	795440000	850230000	1202300000	689260000	0	10227000
P05708;M0R3X7;A0A0G2JST6;A0A0G2JTY2;P27926	Hexokinase-1	Hk1	24	24	6	33	102.41	0	85.289	2022900000	90					Intracellular	0.569	Intracellular	0.9545	0.0002	0.0452	1.4474	0.000375865	-4.07888	-1.76415	+		+	48887200	20675700	19811600	22062200	4	2	28	17	19	25	0	0	1	0	0	517890000	432640000	317760000	469270000	112630000	36183000
Q8VH49	HIG1 domain family member 1A, mitochondrial	Higd1a	2	2	2	43	10.301	0	41.658	58693000	9		+			Transmembrane	0.6861	Transmembrane	0.3138	0.0001	0.6861	0.956634	0.0116115	-1.43745	-0.916618	+		+	1746050	NA	949636	NA	4	0	3	2	2	2	0	0	0	0	0	19926000	22614000	7598200	8555200	0	0
D3ZCR3;D3ZXR5;A0A0G2K6P4;P63159;D3ZC69;M0R7R5;F1LNG6;F1M6B2;D4A6A9;D3ZLG3;D3ZGW6;D3ZIU9	High mobility group protein B1	Hmg1l1;Hmgb1;RGD1563668;LOC100911637	3	3	2	19.7	24.677	0.00043783	4.1357	322080000	9					Intracellular	0.5007	Intracellular	0.9119	0.0001	0.0881	5.11626	0	-3.75231	-3.52523	+		+	8739500	NA	1342320	NA	4	0	2	2	2	3	0	0	0	0	0	83274000	60784000	81509000	81751000	0	14765000
P62959;D4A269	Histidine triad nucleotide-binding protein 1	Hint1	4	4	4	51.6	13.777	0	9.4095	292000000	13					UPS	0.6172	Intracellular	0.9956	0	0.0044	4.4346	0	-3.59263	-3.17417	+		+	8606970	NA	2631260	NA	4	0	7	2	3	1	0	0	0	0	0	37963000	120750000	64617000	68675000	0	0
D3ZVU7;Q4QQW4	Histone deacetylase 1	Hdac1l;Hdac1	3	3	2	12.6	55.259	0	5.1111	74677000	6					Intracellular	0.6089	Intracellular	0.9363	0.0002	0.0635	1.60287	0.00391545	-1.35585	-1.07907	+		+	2169900	NA	461774	NA	4	0	0	0	6	0	0	0	0	0	0	11768000	15762000	29813000	17334000	0	0
P43278	Histone H1.0;Histone H1.0, N-terminally processed	H1f0	2	2	2	10.8	20.885	0.0011862	2.9001	133990000	6					UPS	0.5913	Intracellular	0.8644	0.0001	0.1355	1.26905	0.00152411	-2.08998	-1.24891	+		+	3964870	NA	2027250	NA	3	0	3	0	1	2	0	0	0	0	0	51975000	34395000	24886000	22734000	0	0
A0A0G2K654;P06349	Histone H1t	Hist1h1t	4	4	2	16.5	21.316	0	8.8593	1006500000	17					UPS	0.5913	Intracellular	0.8373	0.0105	0.1522	4.93406	0	-6.04882	-4.80825	+		+	29753200	NA	10708000	NA	4	0	5	5	4	3	0	0	0	0	0	370290000	279430000	214980000	141800000	0	0
D3ZXP3	Histone H2A	H2afx	6	2	0	52.4	15.114	0	54.074	416070000	13					Intracellular	0.9344	Intracellular	0.8061	0.0547	0.1392	3.42297	0.000112224	-3.94803	-2.91964	+		+	12380300	NA	3599220	NA	4	0	5	2	3	3	0	0	0	0	0	123590000	112570000	72313000	106370000	0	1226200
D4ACV3;P0CC09	Histone H2A;Histone H2A type 2-A	Hist2h2ac;Hist2h2aa3	6	2	0	59.5	13.645	0	71.895	1498900000	18					Intracellular	0.9344	Intracellular	0.8659	0.0429	0.0913	4.92985	0	-5.54135	-4.54104	+		+	39839800	NA	13135700	NA	4	0	7	6	4	0	1	0	0	0	0	425920000	523770000	377520000	159390000	3639800	8703600
M0RDM4;G3V9C0;D3ZVK7;A9UMV8;Q4FZT6;P0C170;P0C169;Q6I8Q6;M0RCL5;Q64598;Q00728	Histone H2A;Histone H2A.J;Histone H2A type 3;Histone H2A type 1-E;Histone H2A type 1-C;Histone H2A type 1-F;Histone H2A type 4	LOC680322;Hist1h2ac;Hist1h2ak;H2afj;Hist1h2af;LOC100910554	8	8	3	58.6	14.068	0	84.03	13800000000	95					Intracellular	0.9344	Intracellular	0.6973	0.0633	0.2394	2.36336	9.4e-05	-5.20114	-2.64161	+		+	392455000	18963100	21520000	14334400	4	4	22	34	14	12	2	5	2	2	2	3045700000	4001800000	4060800000	2411400000	15085000	100720000
A0A0A0MXW3;D4AEC0;P0C0S7;M0R6X5	Histone H2A;Histone H2A.Z	H2afz;H2afv	4	2	2	46.5	13.421	0	36.777	470670000	11					UPS	0.523	Intracellular	0.6782	0.0446	0.2772	4.04127	0	-3.91328	-3.19796	+		+	13441300	NA	5010560	NA	4	0	2	5	2	1	1	0	0	0	0	132760000	107780000	152870000	74472000	2790900	0
M0R4L7;G3V9C7;G3V8B3;D3ZWM5;D3ZLY9;A0A0G2JXE0;D3ZNH4;A0A0G2JXI9;Q00715;A0A0G2K7R1;M0RBQ5;D4A817;D3ZNZ9;Q00729	Histone H2B;Histone H2B type 1;Histone H2B type 1-A	Hist1h2bl;Hist1h2bk;LOC100910200;Hist1h2bb;Hist1h2bh;Hist1h2bo;Hist3h2bb;LOC100912338;Hist3h2ba;Hist1h2ba	4	4	4	35.7	13.91	0	196.05	7850600000	227					UPS	0.528	Intracellular	0.8231	0.0001	0.1768	1.4255	0.000825	-2.91011	-1.53636	+		+	175759000	23328200	120362000	15209300	4	4	62	62	50	39	0	7	3	0	4	2573400000	3353500000	939520000	842800000	0	56909000
D3ZJ08;M0RBX6;A0A0G2K0N8;A0A0G2K5X7;A0A0G2K9I5	Histone H3	Hist2h3c2;Hist1h3e	5	5	1	43.4	15.388	0	81.202	7351600000	77					Intracellular	0.9327	Intracellular	0.806	0	0.194	1.15763	0.000868217	-3.53625	-1.47142	+		+	191664000	40205700	144342000	18563600	4	3	24	19	11	9	0	6	4	0	4	3306400000	1930300000	927530000	826260000	1977700	155710000
Q6LED0	Histone H3.1	N / A	5	1	1	43.4	15.404	0	7.5633	86717000	6					Intracellular	0.9327	Intracellular	0.806	0	0.194	0.858166	0.0257873	-1.13528	-0.77497	+		+	2827370	NA	731969	NA	3	0	2	4	0	0	0	0	0	0	0	43745000	31281000	0	11122000	0	0
D3ZK97;P84245	Histone H3;Histone H3.3	H3f3c;H3f3b	5	1	1	43.4	15.358	0	37.455	648640000	19					Intracellular	0.9327	Intracellular	0.8113	0	0.1887	1.38015	0.000819876	-2.98723	-1.52638	+		+	18912100	1568100	23188800	209038	4	3	4	5	0	2	0	5	2	0	1	308920000	220320000	29048000	73665000	0	7062200
P62804	Histone H4;Osteogenic growth peptide	Hist1h4b	11	11	11	65	11.367	0	188.42	8884200000	99					Intracellular	0.9345	Intracellular	0.9252	0.0002	0.0747	1.65287	0.000193995	-5.02246	-2.05703	+		+	229533000	30787500	188014000	15438300	4	2	40	29	11	13	0	1	1	0	4	3619300000	3278700000	1035100000	827570000	0	32465000
Q71UF4	Histone-binding protein RBBP7	Rbbp7	5	5	3	25.9	47.82	0	9.118	241010000	12					UPS	0.5229	Intracellular	0.852	0.0052	0.1428	4.4406	9.24e-05	-2.76028	-2.61801	+		+	7108730	NA	818955	NA	4	0	1	2	4	5	0	0	0	0	0	55804000	51667000	69749000	63790000	0	0
P50503	Hsc70-interacting protein	St13	6	6	6	15.5	41.279	0	10.641	308070000	14					Intracellular	0.5817	Intracellular	0.993	0	0.0069	4.39852	0	-4.17686	-3.50578	+		+	8782570	NA	1494320	NA	4	0	6	4	1	3	0	0	0	0	0	102130000	72775000	61618000	59326000	0	2899600
Q63692;A0A140TAG9;A0A0G2K3C1	Hsp90 co-chaperone Cdc37;Hsp90 co-chaperone Cdc37, N-terminally processed	Cdc37	6	6	6	21.1	44.51	0	16.669	250010000	21					Intracellular	0.6245	Intracellular	0.9211	0	0.0789	4.4428	0.000106667	-3.09536	-2.85296	+		+	7086850	NA	500825	NA	4	0	2	3	2	10	0	1	1	0	2	55849000	51007000	59928000	71995000	0	4146200
F1M963;Q76HN1	Hyaluronidase;Hyaluronidase-1	Hyal1	4	4	4	24.1	50.701	0	32.634	18071000	14	+			+	Transmembrane	0.5219	Transmembrane	0.1478	0.3302	0.5219	0.398148	0.188693	0.703493	0.446265				NA	2072970	NA	205466	0	3	0	0	0	0	0	4	8	0	2	0	0	0	0	0	3501400
Q9WVK7	Hydroxyacyl-coenzyme A dehydrogenase, mitochondrial	Hadh	7	7	7	49.7	34.447	0	38.118	377550000	30					Transmembrane	0.6389	Transmembrane	0.3579	0.0032	0.6389	5.31521	0	-4.19879	-3.91086	+		+	11349200	NA	3929340	NA	4	0	8	9	3	10	0	0	0	0	0	99126000	100620000	52771000	125040000	0	0
F1LQI1;O35952	Hydroxyacylglutathione hydrolase, mitochondrial	Hagh	2	2	2	6.5	34.158	0.00041374	3.4358	47424000	6					UPS	0.5981	Intracellular	0.7733	0.121	0.1057	0.75732	0.154476	-0.569304	-0.486565				1413800	NA	755599	NA	4	0	3	1	1	1	0	0	0	0	0	20392000	12729000	7184900	7118400	0	0
F1LZJ4	Hydroxypyruvate isomerase	Hyi	4	4	4	22	30.589	0	6.8852	104010000	15					Intracellular	0.9343	Intracellular	0.9258	0.0206	0.0536	0.858027	0.0288332	-1.09139	-0.758271	+		+	2633520	2760200	475167	NA	4	1	3	4	3	5	0	0	0	0	0	29664000	30394000	19378000	20003000	0	4571600
P27605	Hypoxanthine-guanine phosphoribosyltransferase	Hprt1	7	7	7	50	24.477	0	27.632	428630000	31					UPS	0.5959	Intracellular	0.9006	0.001	0.0984	1.41137	0.000965986	-2.53987	-1.44002	+		+	11337100	3793470	1972050	971521	4	3	5	8	6	8	0	2	1	0	1	73262000	93057000	112090000	121100000	0	12612000
Q6P136;Q63617	Hypoxia up-regulated protein 1	Hyou1	26	26	26	40.3	111.22	0	236.63	2627500000	141	+			+	Signal-peptide	0.9186	Signal-peptide	0.0068	0.9186	0.0746	7.78678	0	-5.95945	-6.2796	+		+	76277800	1378450	9082970	241619	4	2	34	37	39	30	0	1	0	0	0	597250000	692400000	798190000	525440000	0	7436800
Q6QI86;P85007;Q6AYR6	Immediate early response 3-interacting protein 1	Hdhd2;Ier3ip1	3	3	3	16.1	42.475	0	10.228	92987000	12	+	+			Signal-peptide	0.4813	Signal-peptide	0.3187	0.4813	0.2001	2.3426	0.000742342	-1.90905	-1.54782	+		+	3319430	NA	514880	NA	3	0	3	5	3	1	0	0	0	0	0	24800000	25804000	36366000	6016600	0	0
Q56R18	Importin subunit alpha	Kpna3	8	6	6	39.3	57.772	0	40.76	109770000	15					Intracellular	0.5328	Intracellular	0.9169	0	0.0831	1.3898	0.00440834	-1.42395	-1.05631	+		+	2865200	NA	1243170	NA	4	0	3	3	3	6	0	0	0	0	0	16682000	23220000	21862000	34396000	0	2808900
Q56R17	Importin subunit alpha	Kpna4	10	10	8	47.6	57.922	0	63.573	322050000	39					Intracellular	0.5328	Intracellular	0.9197	0	0.0803	0.937315	0.00441151	-1.98733	-1.05674	+		+	7785570	4033740	2236820	1372060	4	3	10	10	6	11	0	1	0	0	1	74647000	83402000	62074000	79914000	0	4901200
F2Z3Q8;P52296	Importin subunit beta-1	Kpnb1	31	31	31	52.3	97.183	0	190.74	2341200000	155					Intracellular	0.5375	Intracellular	0.9912	0.0048	0.004	2.639	9.14e-05	-4.26389	-2.5974	+		+	65690500	4706800	8761190	2792300	4	4	35	41	33	33	0	4	3	0	6	478550000	498010000	749260000	558720000	0	15692000
Q5EAJ6	Inhibitor of nuclear factor kappa-B kinase-interacting protein	Ikbip	8	8	8	34.6	42.36	0	210.04	666990000	53		+			Transmembrane	0.7725	Transmembrane	0.0623	0.1652	0.7725	7.63118	0	-4.84355	-5.216	+		+	19583700	NA	2565580	NA	4	0	12	11	15	15	0	0	0	0	0	125150000	215000000	183830000	143010000	0	0
D3ZW55	Inosine triphosphate pyrophosphatase	Itpa	7	7	7	49.5	21.927	0	12.24	361360000	17					UPS	0.6071	Intracellular	0.8901	0.0001	0.1099	1.83324	0.000189189	-3.94325	-2.00848	+		+	9441080	5621800	1893560	NA	4	1	6	1	4	4	0	1	1	0	0	72561000	83325000	117960000	74940000	0	7966800
E9PU28	Inosine-5-monophosphate dehydrogenase 2	Impdh2	7	7	7	20.6	55.814	0	18.683	213580000	17					Intracellular	0.504	Intracellular	0.9189	0.0003	0.0808	4.14217	9.66e-05	-2.99161	-2.693	+		+	6352850	NA	1406540	NA	4	0	3	3	3	8	0	0	0	0	0	40767000	67073000	42544000	63200000	0	0
A0A0A0MY31;F1LQX8;C7E1V2;F1LNT1;P29994;A0A0G2KAH9;F1LQR8;P29995	Inositol 1,4,5-trisphosphate receptor type 1	Itpr1	11	11	10	8	308.54	0	29.7	172350000	29		+			Intracellular	0.5682	Intracellular	0.9566	0.0028	0.0406	2.43721	0.00019788	-3.06397	-2.09193	+		+	5154920	NA	1772180	NA	4	0	15	7	3	4	0	0	0	0	0	69959000	48911000	22299000	31181000	0	0
F1M978;P97697	Inositol monophosphatase 1	Impa1	7	7	7	34.3	30.495	0	16.084	342600000	27					UPS	0.555	Intracellular	0.9559	0.0001	0.044	0.770544	0.0169253	-1.48394	-0.847576	+		+	7433070	8111550	1401570	541430	4	2	4	6	5	8	0	1	2	0	1	73482000	50902000	116930000	64592000	0	7173500
P18614	Integrin alpha-1	Itga1	11	11	11	13.5	130.81	0	67.439	526460000	42	+	+			Transmembrane	0.7012	Transmembrane	0.0015	0.2973	0.7012	1.57307	0.000576642	-2.74112	-1.57571	+		+	14117400	8245800	9098600	NA	4	1	15	17	2	5	0	2	1	0	0	196050000	227280000	42718000	44328000	0	13960000
A0A0G2JSK5;P49134	Integrin beta-1	Itgb1	22	22	22	40.7	88.344	0	151	3638600000	149	+	+			Signal-peptide	0.9422	Signal-peptide	0.0017	0.9422	0.0561	2.76835	0.000292276	-2.28131	-1.86308	+		+	94399500	21613700	14288400	11552200	4	4	32	30	32	33	0	8	6	4	4	925470000	1030000000	790800000	714430000	0	60028000
Q99J82	Integrin-linked protein kinase	Ilk	11	11	11	38.7	51.373	0	44.222	567620000	35					Intracellular	0.5462	Intracellular	0.9972	0.0001	0.0028	4.6668	0	-4.31536	-3.70963	+		+	16686200	NA	2615970	NA	4	0	7	8	10	10	0	0	0	0	0	138690000	179560000	146320000	103040000	0	0
P26376;D4A096	Interferon-induced transmembrane protein 3	ifitm3	3	3	2	36.5	14.971	0	25.34	349190000	21		+			Transmembrane	0.5356	Transmembrane	0.4111	0.0533	0.5356	4.20065	0	-3.6787	-3.13524	+		+	10249200	NA	3572250	NA	4	0	6	8	6	1	0	0	0	0	0	103790000	126590000	81261000	37542000	0	0
G3V7J2;Q4V8C7	Interferon-inducible double-stranded RNA-dependent protein kinase activator A	Prkra	5	5	5	24.9	34.385	0	15.528	181150000	14					Intracellular	0.5707	Intracellular	0.7326	0.0002	0.2672	2.13263	0.000300752	-2.91611	-1.90028	+		+	5356380	NA	1475020	NA	4	0	3	5	1	5	0	0	0	0	0	37951000	65211000	37889000	40097000	0	0
B2RZC6;A0A0H2UHX8;Q7TP98	Interleukin enhancer-binding factor 2	Ilf2	11	11	11	53.3	43.062	0	34.399	609480000	48					Intracellular	0.6671	Intracellular	0.9045	0.0026	0.0929	3.58267	0	-4.41161	-3.20374	+		+	17842800	NA	1801690	NA	4	0	11	9	13	15	0	0	0	0	0	152780000	175910000	149230000	126910000	0	0
A0A0G2K2T6;F1LRU1;A0A0G2K4U6;Q9JIL3	Interleukin enhancer-binding factor 3	Ilf3	5	5	5	7.2	95.858	0	14.324	96720000	15					Intracellular	0.7634	Intracellular	0.9546	0	0.0453	3.37075	0.000374016	-1.87797	-1.75748	+		+	2855430	NA	719221	NA	4	0	3	3	4	5	0	0	0	0	0	20149000	14820000	25523000	35424000	0	0
Q68FX0	Isocitrate dehydrogenase [NAD] subunit beta, mitochondrial	Idh3B	7	7	7	24.4	42.353	0	21.985	468630000	35					Intracellular	0.5573	Intracellular	0.952	0.0016	0.0463	5.10215	0	-4.03362	-3.71481	+		+	13850000	NA	3897730	NA	4	0	13	7	7	8	0	0	0	0	0	156140000	131980000	77549000	102960000	0	0
F1LNF7;Q99NA5	Isocitrate dehydrogenase [NAD] subunit, mitochondrial;Isocitrate dehydrogenase [NAD] subunit alpha, mitochondrial	Idh3a	11	11	11	31.4	41.176	0	29.503	2068800000	55					Intracellular	0.5053	Intracellular	0.7121	0.0062	0.2817	5.6322	0	-6.70827	-5.65545	+		+	59905700	NA	11936700	NA	4	0	14	11	11	19	0	0	0	0	0	559320000	570560000	451790000	487150000	0	0
Q5XIJ3;P41565	Isocitrate dehydrogenase [NAD] subunit, mitochondrial;Isocitrate dehydrogenase [NAD] subunit gamma 1, mitochondrial	Idh3g	7	7	7	30.5	42.85	0	36.7	432370000	19					Intracellular	0.5858	Intracellular	0.854	0.0347	0.1112	4.93818	0	-4.30539	-3.82543	+		+	12935000	NA	2166440	NA	4	0	2	10	0	7	0	0	0	0	0	125710000	134960000	61010000	110680000	0	0
P41562	Isocitrate dehydrogenase [NADP] cytoplasmic	Idh1	14	13	13	49.3	46.734	0	133.69	919080000	55					UPS	0.5238	Intracellular	0.9323	0	0.0677	1.32545	0.000854369	-3.081	-1.51166	+		+	22756500	12064700	890825	4091740	4	2	9	14	12	11	0	2	5	0	2	253280000	209710000	227500000	161820000	0	19711000
P56574;A0A0G2JUF6	Isocitrate dehydrogenase [NADP], mitochondrial	Idh2	21	21	20	49.6	50.967	0	111.55	2955900000	81					Intracellular	0.5439	Intracellular	0.8652	0.001	0.1337	6.07139	0	-6.77525	-6.00267	+		+	85460000	NA	18138000	NA	4	0	22	16	15	27	0	1	0	0	0	853210000	810760000	523220000	738960000	0	5852200
P12007	Isovaleryl-CoA dehydrogenase, mitochondrial	Ivd	10	10	10	37.5	46.435	0	79.696	672670000	48					Intracellular	0.5656	Intracellular	0.9893	0.0002	0.0105	3.713	0	-4.6492	-3.37879	+		+	20039000	NA	5580160	NA	4	0	14	12	4	18	0	0	0	0	0	194060000	173020000	77411000	228170000	0	0
Q566E5	KDEL motif-containing protein 2	Kdelc2	12	12	12	34.8	58.701	0	29.761	758970000	52	+			+	Signal-peptide	0.8531	Signal-peptide	0.0701	0.8531	0.0768	5.46003	0	-5.01226	-4.52118	+		+	22308500	NA	3432280	NA	4	0	12	14	10	16	0	0	0	0	0	166950000	182240000	184730000	218400000	0	0
Q9QYU4;A0A0G2K568	Ketimine reductase mu-crystallin	Crym	3	3	3	20.4	33.554	0	6.2773	48188000	9					UPS	0.6172	Intracellular	0.9984	0.0004	0.0012	0.0870781	0.667237	-0.22965	-0.130716				1589730	NA	167027	NA	3	0	1	4	0	4	0	0	0	0	0	12570000	15021000	8965200	11632000	0	0
Q91V33	KH domain-containing, RNA-binding, signal transduction-associated protein 1	Khdrbs1	2	2	2	12.2	48.315	0.00040866	3.255	77446000	4					Intracellular	0.9346	Intracellular	0.8732	0.0002	0.1266	2.84192	0.000496269	-1.84879	-1.63205	+		+	2274700	NA	132358	NA	4	0	0	0	0	4	0	0	0	0	0	15243000	21503000	22676000	18024000	0	0
A0A140TAB3;P37285;B2GV74;Q5PQM2	Kinesin light chain 1	Klc1;Klc2	6	6	6	17.9	62.852	0	27.648	254850000	21					Intracellular	0.5866	Intracellular	0.9655	0.0002	0.0343	2.93079	0.00020563	-2.75451	-2.15771	+		+	7397370	NA	1040000	NA	4	0	6	5	3	7	0	0	0	0	0	72519000	32480000	94969000	53185000	0	0
Q2PQA9;G3V6L4;A0A0G2K070;F1M8F2;A0A0G2K0Q2;P56536;Q6QLM7	Kinesin-1 heavy chain	Kif5b	22	22	22	32.7	109.53	0	311.83	809440000	85					Intracellular	0.7341	Intracellular	0.9364	0.0002	0.0634	3.82484	0	-4.54224	-3.39648	+		+	23030000	1215840	8815800	593772	4	2	13	23	28	21	0	0	0	0	0	136110000	191980000	334970000	136990000	0	1931000
Q6P7Q4	Lactoylglutathione lyase	Glo1	5	5	5	45.7	20.819	0	23.817	233250000	29					UPS	0.6368	Intracellular	0.744	0.0333	0.2227	0.605329	0.0422962	-1.22394	-0.696635	+		+	4649130	6589650	220984	4183600	4	2	8	5	6	7	0	0	0	0	3	41501000	53772000	61383000	56476000	0	16347000
Q62733	Lamina-associated polypeptide 2, isoform beta	Tmpo	11	11	11	40.3	50.277	0	48.497	444660000	44		+			Intracellular	0.9329	Intracellular	0.9739	0	0.0261	4.65156	0	-3.95846	-3.4868	+		+	13239500	NA	2674520	NA	4	0	9	13	10	12	0	0	0	0	0	88406000	94690000	106580000	154990000	0	0
G3V7U4;P70615	Lamin-B1	Lmnb1	10	9	9	24.7	66.686	0	32.001	323350000	21					Intracellular	0.8796	Intracellular	0.9993	0	0.0007	5.69634	0	-4.48205	-4.262	+		+	9412480	NA	1189280	NA	4	0	4	4	7	6	0	0	0	0	0	78972000	76138000	108410000	58783000	0	0
Q9QX69	LanC-like protein 1	Lancl1	4	4	4	16.5	45.239	0	8.7641	147710000	17					UPS	0.5235	Intracellular	0.756	0.0059	0.2381	3.29046	0.00016	-2.96006	-2.39095	+		+	4413100	NA	1014910	NA	4	0	5	2	4	6	0	0	0	0	0	43108000	16447000	36299000	51857000	0	0
Q64654	Lanosterol 14-alpha demethylase	Cyp51a1	3	3	3	10.5	56.706	0	8.8504	32112000	13		+			Transmembrane	0.8176	Transmembrane	0.0112	0.1712	0.8176	0.234075	0.370724	0.460279	0.288707				1119110	NA	283597	NA	3	0	3	2	2	6	0	0	0	0	0	4478700	4163100	8327800	15143000	0	0
A0A0G2JVC8;P48450;A0A096MK62;A0A096MK55	Lanosterol synthase	Lss	9	9	9	16.6	83.283	0	18.573	286150000	33					Intracellular	0.7007	Intracellular	0.9518	0	0.0482	3.99412	0.000106262	-3.31927	-2.84588	+		+	8489680	NA	2730490	NA	4	0	9	10	6	8	0	0	0	0	0	78205000	118630000	42167000	47142000	0	0
Q63016;D3ZMM8	Large neutral amino acids transporter small subunit 1	Slc7a5	3	3	3	6.6	55.903	0.00044583	4.3895	298770000	7		+			Transmembrane	0.9445	Transmembrane	0.0522	0.0033	0.9445	5.19728	0	-3.1039	-3.06752	+		+	8645850	NA	1446430	NA	4	0	1	2	1	3	0	0	0	0	0	56096000	64737000	97386000	76537000	0	0
Q6MG49;A0A0G2K7C1	Large proline-rich protein BAG6	Bag6	5	5	5	8.7	120.01	0	69.036	109160000	28					Intracellular	0.599	Intracellular	0.9925	0	0.0075	3.03857	0.000741674	-1.66271	-1.54764	+		+	3201200	NA	452122	NA	4	0	8	8	6	6	0	0	0	0	0	29037000	30120000	31309000	18690000	0	0
Q64361	Latexin	Lxn	8	8	8	62.8	25.58	0	34.706	1374700000	62					UPS	0.6368	Intracellular	0.92	0	0.0799	0.488048	0.0340565	-1.84895	-0.732192	+		+	29915200	26975700	8046370	6038230	4	3	14	10	14	13	0	4	2	0	5	283480000	259930000	425490000	213060000	0	63896000
Q5U2R7	LDLR chaperone MESD	Mesdc2	2	2	2	16.1	25.215	0.003413	2.5533	41610000	4	+			+	Signal-peptide	0.956	Signal-peptide	0.0303	0.956	0.0137	1.12073	0.0160615	-1.13344	-0.85307	+		+	1291200	NA	86779.2	NA	3	0	2	1	0	1	0	0	0	0	0	10047000	8666700	13047000	9849200	0	0
Q5PPG2;Q9R0J8	Legumain	Lgmn	6	6	6	19.3	49.48	0	24.477	153420000	24	+			+	Signal-peptide	0.9592	Signal-peptide	0.0028	0.9592	0.038	0.118083	0.653472	-0.192784	-0.136919				3631580	6330000	529516	6378100	4	2	3	5	4	3	0	0	0	7	2	31358000	23212000	25404000	24404000	0	0
Q5XIN6	LETM1 and EF-hand domain-containing protein 1, mitochondrial	Letm1	11	11	11	24.1	83.059	0	20.487	461540000	28		+			Intracellular	0.5855	Intracellular	0.8678	0.0078	0.1244	4.28918	0	-4.11139	-3.41874	+		+	13686500	NA	1330530	NA	4	0	8	5	4	11	0	0	0	0	0	89862000	121840000	111250000	138600000	0	0
F1LM33;Q5SGE0	Leucine-rich PPR motif-containing protein, mitochondrial	Lrpprc	32	32	32	34.1	156.68	0	109.91	1199200000	115					Intracellular	0.5668	Intracellular	0.8303	0.1642	0.0054	5.82703	0	-5.51926	-5.04285	+		+	35523700	NA	7673250	NA	4	0	31	37	19	28	0	0	0	0	0	269970000	377860000	230960000	316150000	0	4232300
Q5RJR8;A0A0G2K6J3	Leucine-rich repeat-containing protein 59	Lrrc59	10	10	10	42.7	34.869	0	235.6	3309400000	78		+			Intracellular	0.6109	Intracellular	0.9525	0.0055	0.0421	4.73895	0	-6.35043	-4.81279	+		+	95711000	NA	17816200	NA	4	0	24	17	19	18	0	0	0	0	0	666100000	761280000	1214700000	666060000	0	1254900
A0A0G2JYN3;A0A0G2JUW8;P97629;A0A0H2UHK5	Leucyl-cystinyl aminopeptidase	Lnpep	7	7	7	10.8	115.48	0	11.088	129330000	16		+			UPS	0.5171	Intracellular	0.9234	0	0.0766	3.17361	8.27e-05	-3.13582	-2.4348	+		+	3774150	NA	805975	NA	4	0	5	4	4	3	0	0	0	0	0	32970000	29054000	44538000	22773000	0	0
A0A0G2JTH4;P97829	Leukocyte surface antigen CD47	Cd47	2	2	2	6.4	38.927	0	4.7702	87436000	8	+	+			Signal-peptide	0.6323	Signal-peptide	0.1825	0.6323	0.1852	1.31394	0.00373099	-1.54311	-1.08285	+		+	2771630	NA	377864	NA	3	0	2	2	1	3	0	0	0	0	0	19390000	25097000	10003000	23727000	0	6210900
Q499P2;P30349	Leukotriene A(4) hydrolase;Leukotriene A-4 hydrolase	Lta4h	10	10	10	30.3	69.088	0	18.281	924660000	24					UPS	0.5214	Intracellular	0.957	0.0002	0.0428	0.829128	0.00429971	-2.35603	-1.06116	+		+	17220800	18449500	978716	4558730	4	2	5	7	6	2	0	1	1	0	2	71507000	58936000	710190000	50436000	0	11980000
Q99MZ8;A0A096MJG7	LIM and SH3 domain protein 1	Lasp1	8	8	8	32.3	29.97	0	184.69	1814700000	44					Intracellular	0.5468	Intracellular	0.9904	0	0.0096	2.16374	0.000207152	-3.73448	-2.16361	+		+	49555500	6843730	14214900	1429560	4	3	12	9	12	8	0	0	0	0	3	412010000	406560000	583510000	379130000	0	9165900
A1L1J9	Lipase maturation factor 2	Lmf2	3	3	3	7.3	80.253	0	8.5473	79162000	17		+			Transmembrane	0.7161	Transmembrane	0.1313	0.1526	0.7161	1.00351	0.0159732	-1.221	-0.855961	+		+	2995930	NA	376622	NA	3	0	4	1	6	6	0	0	0	0	0	28327000	3654500	23001000	24180000	0	0
O08564;G3V9Y2	Lipid phosphate phosphohydrolase 1	Ppap2a	3	3	3	12.1	31.996	0	6.512	232040000	10		+			Transmembrane	0.9196	Transmembrane	0.0032	0.0773	0.9196	3.40755	0.000210526	-2.53909	-2.19364	+		+	6842100	NA	963825	NA	4	0	4	3	2	1	0	0	0	0	0	56395000	77124000	53765000	44755000	0	0
Q5XI07	Lipoma-preferred partner homolog	Lpp	23	23	23	59.5	68.26	0	205.04	1783800000	122					Intracellular	0.6667	Intracellular	0.9259	0.0004	0.0736	5.68883	0	-5.93664	-5.23388	+		+	52441000	NA	5852270	NA	4	0	33	28	31	29	0	0	0	0	1	397130000	486850000	493770000	404270000	0	1830300
P04642;H9N9H4;Q6AYX2;P19629	L-lactate dehydrogenase A chain	Ldha	25	25	24	81	36.45	0	272.1	14700000000	285					UPS	0.615	Intracellular	0.8012	0.0006	0.1982	0.85431	0.0372087	-0.990169	-0.716407	+		+	359352000	205615000	100791000	106724000	4	4	58	43	54	33	0	36	31	9	21	3135100000	3048300000	4306900000	1627200000	0	1015600000
P42123	L-lactate dehydrogenase B chain	Ldhb	8	7	7	27.2	36.612	0	11.986	216300000	15					UPS	0.615	Intracellular	0.837	0.0014	0.1616	1.26624	0.00152886	-2.105	-1.25188	+		+	5580820	6397100	2115220	NA	4	1	3	4	3	5	0	0	0	0	0	28863000	31978000	86452000	52696000	0	565490
Q924S5	Lon protease homolog, mitochondrial	Lonp1	37	37	37	55.4	105.79	0	323.31	4640200000	172					Intracellular	0.5865	Intracellular	0.782	0.0339	0.1841	2.77303	0	-6.82605	-3.30172	+		+	130002000	6117200	49042400	6505100	4	2	41	42	32	57	0	0	0	0	0	1064100000	1075700000	893700000	1580900000	0	2518800
P15650	Long-chain specific acyl-CoA dehydrogenase, mitochondrial	Acadl	14	14	14	37	47.872	0	58.802	1140000000	61					Intracellular	0.5448	Intracellular	0.7642	0.1273	0.1085	4.19782	0	-5.19836	-3.91393	+		+	33472500	NA	8798940	NA	4	0	18	23	7	13	0	0	0	0	0	315270000	368550000	199980000	251220000	0	0
O88813;F1LPB3	Long-chain-fatty-acid--CoA ligase 5	Acsl5	6	6	6	16.4	76.404	0	15.482	108790000	18		+			Transmembrane	0.9227	Transmembrane	0.02	0.0573	0.9227	2.68758	0.000578225	-1.81515	-1.57788	+		+	3084250	NA	365598	NA	4	0	2	3	11	2	0	0	0	0	0	15652000	21792000	49010000	20616000	0	0
Z4YNF4;P41498;A0A0G2K394	Low molecular weight phosphotyrosine protein phosphatase	Acp1	4	4	4	43.4	18.215	0	17.475	85822000	11					UPS	0.5508	Intracellular	0.9313	0.0396	0.0291	0.815329	0.0120982	-1.64272	-0.910489	+		+	2983100	NA	343565	NA	3	0	4	1	4	2	0	0	0	0	0	25238000	18707000	34224000	7652100	0	0
P38656;Q66HM7;D3ZLH9	Lupus La protein homolog	Ssb;LOC680385	4	4	4	14.9	47.777	0	9.0705	159830000	18					Intracellular	0.9347	Intracellular	0.9023	0	0.0977	3.83825	0.000161616	-2.69535	-2.41281	+		+	4730980	NA	675114	NA	4	0	3	5	3	7	0	0	0	0	0	45313000	39048000	31833000	42616000	0	1015600
Q5XIM7	Lysine--tRNA ligase	Kars	15	15	15	40.9	71.622	0	213.8	644650000	62					Intracellular	0.6454	Intracellular	0.9506	0.0001	0.0493	6.22194	0	-5.00993	-4.86751	+		+	18741000	NA	1731000	NA	4	0	12	20	14	16	0	0	0	0	0	157760000	191910000	137960000	148210000	0	1282400
Q642D2;P20611	Lysosomal acid phosphatase	Acp2	6	6	6	12.8	48.404	0	12.111	147480000	13	+	+			Signal-peptide	0.7418	Signal-peptide	0.0314	0.7418	0.2268	2.27802	0.000362942	-2.25826	-1.69914	+		+	4350400	NA	503734	NA	4	0	2	4	2	5	0	0	0	0	0	25767000	40605000	40249000	40864000	0	0
P27615	Lysosome membrane protein 2	Scarb2	5	5	5	18.2	54.09	0	26.706	606870000	32		+			Transmembrane	0.6967	Transmembrane	0.0054	0.2979	0.6967	5.32792	0	-4.56592	-4.16572	+		+	17841000	NA	2395060	NA	4	0	8	8	7	9	0	0	0	0	0	153180000	167260000	145720000	140710000	0	0
P14562;A0A0U1RRS9	Lysosome-associated membrane glycoprotein 1	Lamp1	5	5	5	14.5	43.969	0	21.906	1038900000	16	+	+			Signal-peptide	0.9056	Signal-peptide	0.0054	0.9056	0.089	4.17615	0	-4.56735	-3.60161	+		+	30687700	NA	2599200	NA	4	0	3	5	4	4	0	0	0	0	0	197250000	224740000	300710000	316240000	0	0
P17046	Lysosome-associated membrane glycoprotein 2	Lamp2	3	3	3	9.5	45.155	0	13.775	290780000	13	+	+			Signal-peptide	0.9461	Signal-peptide	0.0014	0.9461	0.0524	2.42256	0.000191562	-2.93571	-2.03685	+		+	8608800	NA	4648220	NA	4	0	2	4	4	3	0	0	0	0	0	91214000	109280000	45389000	44299000	0	596410
P30904;D3ZE63;D4A3P7;F1LTZ6	Macrophage migration inhibitory factor	Mif;LOC679748;RGD1560513	4	4	4	41.7	12.477	0	13.664	466300000	28					UPS	0.5164	Intracellular	0.9472	0.0002	0.0526	3.41494	0.000104478	-3.74665	-2.82586	+		+	12540000	NA	4513890	NA	4	0	5	4	11	5	0	1	1	0	1	91378000	110620000	193260000	53990000	0	7861100
Q6AYC4	Macrophage-capping protein	Capg	12	12	12	65.6	38.798	0	98.715	1622700000	78					UPS	0.5726	Intracellular	0.9482	0.0001	0.0517	0.446469	0.0751719	-1.25484	-0.609179				35520200	34323000	9756690	4319460	4	3	10	14	10	15	0	15	6	0	8	377150000	429360000	225200000	317510000	0	117820000
P13852	Major prion protein	Prnp	2	2	2	15	27.804	0	5.4363	170180000	8	+			+	Signal-peptide	0.9994	Signal-peptide	0.0002	0.9994	0.0004	1.55887	0.00100676	-2.25905	-1.4288	+		+	5015130	NA	2055960	NA	3	0	1	0	2	2	0	1	0	1	1	24342000	33836000	66094000	39341000	0	0
Q62667;A0A140TAE0	Major vault protein	Mvp	24	24	24	44.4	95.797	0	133.68	840700000	94					Intracellular	0.6455	Intracellular	0.9799	0.0001	0.02	1.35667	0.000871219	-2.80817	-1.47419	+		+	21660300	6582870	5261360	2102530	4	3	28	25	16	13	0	2	2	0	8	227820000	219150000	168410000	167060000	0	13074000
O88989	Malate dehydrogenase, cytoplasmic	Mdh1	11	11	11	44.6	36.483	0	25.899	1414500000	54					UPS	0.6365	Intracellular	0.7435	0.0125	0.244	0.268687	0.356874	-0.439342	-0.29806				30258800	27469200	6095980	15102100	4	4	8	8	15	9	0	5	3	2	4	248950000	241650000	355480000	251280000	0	110020000
P04636	Malate dehydrogenase, mitochondrial	Mdh2	19	19	19	61.5	35.683	0	139.53	14100000000	252					UPS	0.6119	Intracellular	0.9802	0.0117	0.0081	1.64902	0.000296925	-3.94038	-1.88459	+		+	390982000	47059700	81948300	34560700	4	4	56	62	39	54	0	12	12	1	16	3446700000	3751600000	2552200000	3784800000	0	175010000
A0A0G2K121;Q5FVQ4	Malectin	Mlec	8	8	8	37.1	32.809	0	112.57	1195100000	31	+	+			Signal-peptide	0.986	Signal-peptide	0.0028	0.986	0.0112	5.33768	0	-6.32327	-5.23252	+		+	35021300	NA	5482050	NA	4	0	9	7	7	8	0	0	0	0	0	281950000	343940000	349630000	219530000	0	0
D3ZJH9;A0A0G2K502	Malic enzyme	Me2	6	6	6	21.4	65.351	0	125.81	127240000	21					Intracellular	0.5678	Intracellular	0.8812	0.0023	0.1165	3.27962	0.000207664	-2.55575	-2.16598	+		+	3783500	NA	1345110	NA	4	0	4	6	7	4	0	0	0	0	0	37755000	35717000	24504000	29264000	0	0
A0A0G2K1S6;F1LQQ1;P13697	Malic enzyme;NADP-dependent malic enzyme	Me1	14	14	14	49.2	63.832	0	71.943	541050000	82					Intracellular	0.5658	Intracellular	0.9817	0	0.0183	0.478621	0.0861787	-1.06261	-0.587878				11617400	10700900	3991960	2411710	4	3	15	16	16	19	0	8	2	0	6	95604000	94384000	112270000	173870000	0	22372000
A0A0G2K724;Q4G009	Malignant T-cell-amplified sequence 1	Mcts1	2	2	2	17.7	20.555	0.00042845	3.873	62474000	8					UPS	0.618	Intracellular	0.7913	0.0038	0.2049	1.64777	0.00757703	-1.14439	-0.97381	+		+	1849550	NA	350454	NA	4	0	1	2	3	2	0	0	0	0	0	14718000	14982000	15834000	16940000	0	0
A0A0G2K824;Q5XIC1	Mannose-1-phosphate guanyltransferase alpha	Gmppa	7	7	7	31.5	46.648	0	14.856	171780000	21					Intracellular	0.5687	Intracellular	0.8861	0.0343	0.0796	2.56854	0.000377734	-2.21525	-1.76973	+		+	4935530	NA	2289560	NA	4	0	5	7	4	5	0	0	0	0	0	10437000	40586000	81958000	38794000	0	0
G3V743;A0A0G2K8S6;O88941	Mannosyl-oligosaccharide glucosidase	Mogs	12	12	12	26.7	81.025	0	25.817	237090000	35		+			Intracellular	0.5485	Intracellular	0.9251	0.0112	0.0637	4.31537	9.84e-05	-2.97946	-2.73672	+		+	6928000	NA	825366	NA	4	0	10	12	6	7	0	0	0	0	0	63019000	71040000	59795000	43233000	0	0
A0A0G2JSR7;P43244	Matrin-3	Matr3	13	13	13	25.4	94.501	0	69.608	738900000	46					Intracellular	0.5857	Intracellular	0.8556	0.0548	0.0896	4.44366	0	-4.71219	-3.81967	+		+	21811700	NA	1567340	NA	4	0	9	10	15	12	0	0	0	0	0	152810000	218160000	185710000	182220000	0	0
Q10739	Matrix metalloproteinase-14	Mmp14	4	4	4	7.2	66.079	0	6.2336	142860000	10	+	+			Signal-peptide	0.7459	Signal-peptide	0.0409	0.7459	0.2133	0.656234	0.028639	-1.3674	-0.759486	+		+	5242070	NA	297631	NA	3	0	1	4	3	2	0	0	0	0	0	21360000	54215000	62968000	4317500	0	0
G3V796;P08503	Medium-chain specific acyl-CoA dehydrogenase, mitochondrial	Acadm	4	4	4	21.1	46.571	0	74.354	161470000	13					Intracellular	0.5641	Intracellular	0.9811	0	0.0189	2.0309	0.000822796	-2.06497	-1.53181	+		+	4794730	NA	1492610	NA	4	0	5	5	1	2	0	0	0	0	0	43260000	60651000	26176000	31385000	0	0
A0A0G2JWZ2;O08590;Q5FVM2	Membrane primary amine oxidase	Aoc3	3	3	3	3.7	151.65	0	5.8561	72154000	6		+			Intracellular	0.5449	Intracellular	0.9414	0.0001	0.0585	1.53233	0.00304663	-1.46619	-1.11475	+		+	2733870	NA	834219	NA	3	0	3	1	0	2	0	0	0	0	0	20529000	32254000	4270800	15100000	0	0
P70580;A0A0H2UHK2	Membrane-associated progesterone receptor component 1	Pgrmc1	6	6	5	40	21.598	0	187.07	295980000	28		+			Transmembrane	0.8514	Transmembrane	0.0085	0.1401	0.8514	3.14207	0.000158416	-3.04525	-2.37848	+		+	8666050	NA	1943030	NA	4	0	6	8	9	5	0	0	0	0	0	74900000	90393000	84522000	46164000	0	0
Q5XIU9	Membrane-associated progesterone receptor component 2	Pgrmc2	5	4	4	33.2	23.403	0	323.31	239730000	15		+			Transmembrane	0.9438	Transmembrane	0.0003	0.0559	0.9438	4.1095	0.000109162	-3.29531	-2.87295	+		+	7115000	NA	492732	NA	4	0	5	4	2	4	0	0	0	0	0	59846000	62851000	53697000	63335000	0	0
P0C5H9	Mesencephalic astrocyte-derived neurotrophic factor	Manf	5	5	5	22.9	20.388	0	12.607	494840000	18	+			+	Signal-peptide	0.7747	Signal-peptide	0.1682	0.7747	0.0572	2.80571	9.05e-05	-3.93049	-2.58735	+		+	13732900	2578200	5282690	NA	4	1	2	5	3	3	0	3	0	0	2	58753000	125870000	219540000	83074000	0	4561700
A0A0G2JT30;Q5U2R0	Methionine adenosyltransferase 2 subunit beta	Mat2b	3	3	3	15.5	36.236	0	14.852	89010000	15					UPS	0.5712	Intracellular	0.7859	0.0023	0.2117	2.11021	0.00324356	-1.22932	-1.10429	+		+	2587400	NA	583983	NA	4	0	3	3	4	5	0	0	0	0	0	21198000	18008000	34036000	15768000	0	0
Q5XIT9	Methylcrotonoyl-CoA carboxylase beta chain, mitochondrial	Mccc2	5	5	5	17.1	61.516	0	28.148	144690000	19					Intracellular	0.7632	Intracellular	0.9465	0.0001	0.0534	2.03651	0.000852113	-2.00974	-1.50898	+		+	3864750	NA	1354050	NA	4	0	7	7	2	3	0	0	0	0	0	60795000	45988000	10218000	27693000	0	0
G3V7J0;Q02253	Methylmalonate-semialdehyde dehydrogenase [acylating], mitochondrial	Aldh6a1	14	14	14	45.8	57.747	0	115.39	824700000	52					Intracellular	0.511	Intracellular	0.9872	0.0005	0.0123	4.72621	0	-4.25014	-3.69757	+		+	24748500	NA	7845000	NA	4	0	14	19	4	15	0	0	0	0	0	223400000	236550000	114380000	250380000	0	0
A0A0G2JVH4;A0A140TAG5;Q3KR86	MICOS complex subunit Mic60	Immt	18	18	18	37.4	86.229	0	118.11	1499400000	64		+			Transmembrane	0.7208	Transmembrane	0.2535	0.0256	0.7208	4.92128	0	-6.2255	-4.88745	+		+	44140300	NA	7291960	NA	4	0	17	15	11	21	0	0	0	0	0	371700000	497790000	322140000	307800000	0	0
A0A0G2K5C6;G3V7U2;P34926	Microtubule-associated protein 1A;MAP1A heavy chain;MAP1 light chain LC2	Map1a	25	24	24	16.4	325.61	0	122.57	821380000	107					Intracellular	0.5869	Intracellular	0.8921	0.0572	0.0507	4.81108	0	-4.84828	-4.08993	+		+	22531000	NA	4639420	NA	4	0	32	34	20	21	0	0	0	0	0	247030000	238780000	177650000	101790000	0	12042000
P15205	Microtubule-associated protein 1B;MAP1B heavy chain;MAP1 light chain LC1	Map1b	26	26	25	23	269.64	0	235.97	811780000	87					Intracellular	0.5235	Intracellular	0.7367	0.081	0.1823	4.57378	0	-5.09093	-4.08988	+		+	23433300	NA	6564090	NA	4	0	19	17	33	18	0	0	0	0	0	147350000	172190000	351350000	140900000	0	0
A0A0H2UHQ3;P0C5W1	Microtubule-associated protein 1S;MAP1S heavy chain;MAP1S light chain	Map1s	3	3	3	5.6	102.43	0	12.578	38803000	15					Intracellular	0.8792	Intracellular	0.7044	0.0517	0.244	0.215167	0.579348	-0.197373	-0.169245				1127230	NA	170948	NA	4	0	4	3	4	4	0	0	0	0	0	8937200	9877300	10125000	9262300	0	600400
F1LQZ9;Q63560	Microtubule-associated protein 6	Map6	4	4	4	14.1	100.44	0	26.836	107360000	9					Intracellular	0.7333	Intracellular	0.9826	0.0113	0.0062	4.00624	0.000221636	-2.42136	-2.27161	+		+	3047420	NA	526876	NA	4	0	2	3	1	3	0	0	0	0	0	16276000	23224000	57771000	10093000	0	0
Q66HR2;A0A0G2JT48	Microtubule-associated protein RP/EB family member 1	Mapre1	9	9	9	58.2	30.004	0	261.6	571890000	36					UPS	0.6172	Intracellular	0.9864	0.0032	0.0104	1.17329	0.00109388	-2.71216	-1.34584	+		+	13660700	8902750	756416	668566	4	2	8	9	10	5	0	2	0	0	2	109780000	145830000	160830000	122590000	0	10202000
G3V6H5;P97700	Mitochondrial 2-oxoglutarate/malate carrier protein	Slc25a11	10	10	10	45.5	34.136	0	35.211	657470000	32		+			Transmembrane	0.9359	Transmembrane	0.061	0.0031	0.9359	6.66472	0	-4.29888	-4.45148	+		+	18610000	NA	3576770	NA	4	0	14	12	3	3	0	0	0	0	0	234400000	166020000	137560000	119500000	0	0
Q66HP8;P97521	Mitochondrial carnitine/acylcarnitine carrier protein	Slc25a20	6	6	6	39.2	33.071	0	48.003	166320000	21		+			Transmembrane	0.8206	Transmembrane	0.1779	0.0015	0.8206	2.82199	0.000304348	-2.34946	-1.91523	+		+	4925970	NA	507435	NA	4	0	8	3	7	3	0	0	0	0	0	95185000	25569000	35628000	9942100	0	0
P84817	Mitochondrial fission 1 protein	Fis1	7	7	7	52.6	16.994	0	226.04	327890000	37		+			UPS	0.5342	Intracellular	0.995	0.001	0.0039	4.86356	0	-3.53608	-3.2884	+		+	9515250	NA	2465320	NA	4	0	10	9	6	10	0	2	0	0	0	95484000	104910000	49437000	77177000	0	878570
Q5XII9	Mitochondrial fission regulator 1-like	Mtfr1l	3	3	3	19.4	31.73	0	4.7923	44458000	8					UPS	0.5468	Intracellular	0.9998	0.0001	0.0001	1.2077	0.00647606	-1.41009	-0.9959	+		+	1724600	NA	149223	NA	3	0	2	4	0	2	0	0	0	0	0	7807300	13296000	2332600	21022000	0	0
Q75Q41	Mitochondrial import receptor subunit TOM22 homolog	Tomm22	2	2	2	32.4	15.49	0	13.578	147610000	6		+			UPS	0.6183	Intracellular	0.9125	0.0002	0.0873	1.94331	0.00100337	-1.88563	-1.4241	+		+	4374600	NA	2972320	NA	4	0	2	2	1	1	0	0	0	0	0	67701000	24917000	33863000	21132000	0	0
Q3KRD5	Mitochondrial import receptor subunit TOM34	Tomm34	3	3	3	15.5	34.461	0	7.4998	25239000	8					UPS	0.5282	Intracellular	0.9569	0	0.0431	0.875428	0.0597088	0.815346	0.64219				991830	NA	262192	NA	3	0	3	2	2	1	0	0	0	0	0	10957000	10501000	3780500	0	0	0
R9PXR4;Q75Q39	Mitochondrial import receptor subunit TOM70	Tomm70a	2	2	2	6.6	61.938	0	5.3657	25977000	9		+			Transmembrane	0.9116	Transmembrane	0.0706	0.0178	0.9116	0.961106	0.0380698	-0.919562	-0.713117	+		+	866360	NA	255316	NA	3	0	4	4	1	0	0	0	0	0	0	10023000	9600900	6353300	0	0	0
Q03346	Mitochondrial-processing peptidase subunit beta	Pmpcb	5	5	5	21.3	54.265	0	8.7751	109500000	10					Intracellular	0.5639	Intracellular	0.8591	0.0006	0.1403	2.13107	0.000498594	-2.24644	-1.64415	+		+	3835900	NA	783885	NA	3	0	2	4	0	4	0	0	0	0	0	36962000	31329000	14982000	26225000	0	0
P63086	Mitogen-activated protein kinase 1	Mapk1	12	12	9	58.1	41.275	0	49.966	634890000	47					Intracellular	0.5573	Intracellular	0.8159	0.0001	0.184	2.81769	9.06e-05	-3.91363	-2.58806	+		+	16328800	NA	4774030	NA	4	0	14	8	14	10	0	0	0	1	0	140560000	103000000	245780000	128840000	0	11474000
P21708	Mitogen-activated protein kinase 3	Mapk3	10	7	7	53.2	43.08	0	19.106	333340000	27					Intracellular	0.5656	Intracellular	0.9374	0.0007	0.062	5.8015	0	-3.41247	-3.46836	+		+	9838600	NA	975371	NA	4	0	6	5	7	9	0	0	0	0	0	65038000	76311000	95600000	96395000	0	0
A0A1W2Q6E9;A0A096MK30;O35763	Moesin	Msn	43	43	32	70.7	67.651	0	323.31	13500000000	337					Intracellular	0.6541	Intracellular	0.9439	0.0003	0.0558	0.490163	0.153425	-0.715291	-0.488234				299222000	231179000	32046900	147370000	4	4	45	50	48	62	0	43	29	4	56	2642600000	2690000000	2698900000	2710200000	0	909240000
Q6AYT7	Monoacylglycerol lipase ABHD12	Abhd12	4	4	4	17.1	45.295	0	9.6626	63328000	8		+			Intracellular	0.5465	Intracellular	0.7456	0.006	0.2484	1.15059	0.0482658	-0.78216	-0.676303	+		+	1861650	NA	577108	NA	4	0	2	2	3	1	0	0	0	0	0	14311000	27046000	13216000	8754400	0	0
P51583;F8WFR8;A0A0G2K5S4	Multifunctional protein ADE2;Phosphoribosylaminoimidazole-succinocarboxamide synthase;Phosphoribosylaminoimidazole carboxylase	Paics;LOC100359876	12	12	12	40.5	47.096	0	51.461	703860000	70					UPS	0.5238	Intracellular	0.9535	0.0001	0.0464	2.20387	0.000499531	-2.20196	-1.64922	+		+	17986300	5640570	2496400	1672280	4	3	18	12	11	18	0	3	4	0	4	147980000	159500000	175590000	190670000	0	12441000
O35217;G3V7H2;M0R8T0	Multiple inositol polyphosphate phosphatase 1	Minpp1;RGD1564801	6	6	6	19.8	54.589	0	15.32	235400000	29	+			+	Transmembrane	0.4961	Transmembrane	0.0868	0.4171	0.4961	0.233948	0.266476	0.81603	0.369439				3372370	13907000	1573400	1462390	4	3	4	1	4	3	0	6	5	2	4	7563400	19077000	53493000	19891000	0	49030000
O35821	Myb-binding protein 1A	Mybbp1a	17	17	17	22	152.28	0	90.546	306230000	56					Intracellular	0.5694	Intracellular	0.9982	0	0.0018	3.92478	9.98e-05	-3.22234	-2.76389	+		+	9037650	NA	1487160	NA	4	0	14	13	14	15	0	0	0	0	0	78246000	92469000	72935000	62577000	0	0
Q05BA4;Q6VBQ5	Myeloid-associated differentiation marker	Myadm	7	7	7	27	35.118	0	296.84	1359300000	29		+			Transmembrane	0.7894	Transmembrane	0.0049	0.2057	0.7894	1.91607	0.000188552	-3.67141	-2.00034	+		+	36561000	8725500	15809300	1559170	4	2	4	8	7	7	0	1	1	1	0	296390000	321080000	441740000	264770000	0	16251000
P16409;P02600	Myosin light chain 3;Myosin light chain 1/3, skeletal muscle isoform	Myl3;Myl1	2	1	1	12	22.156	0	40.462	368220000	5					UPS	0.614	Intracellular	0.8973	0	0.1027	4.19578	0	-3.76996	-3.18583	+		+	10775600	NA	1916750	NA	4	0	1	1	2	1	0	0	0	0	0	85727000	107870000	110180000	64441000	0	0
A0A0G2K6J5;B2GV99;Q64119;A0A0G2JWE1;D3ZHA7	Myosin light polypeptide 6	Myl6	9	9	8	55.6	16.961	0	194.51	9975100000	105					UPS	0.5947	Intracellular	0.9016	0.0001	0.0984	1.59078	0.000244275	-4.46954	-1.93003	+		+	269005000	34996700	51172800	11283300	4	3	23	19	24	20	0	9	7	0	3	2386100000	3011800000	2378900000	1945200000	0	136040000
A0A140TA95;G3V9F3;Q9ERE6	Myosin phosphatase Rho-interacting protein	Mprip	14	14	3	24.8	113.11	0	38.36	245300000	35					Intracellular	0.8798	Intracellular	0.966	0.0002	0.0338	3.76138	9.33e-05	-3.09866	-2.63427	+		+	7206450	NA	703995	NA	4	0	5	8	11	11	0	0	0	0	0	46914000	58077000	76656000	63656000	0	0
A0A0G2JSW0;P18666	Myosin regulatory light chain 12B	Myl12b	10	1	1	62.2	19.779	0	167.94	73167000	8					UPS	0.5574	Intracellular	0.8799	0	0.12	1.75864	0.0195429	-0.880381	-0.822203	+		+	2174250	NA	849114	NA	4	0	1	3	3	1	0	0	0	0	0	15183000	26480000	13029000	18475000	0	0
P13832	Myosin regulatory light chain RLC-A	Rlc-a	11	11	3	79.7	19.895	0	323.31	3679800000	121					UPS	0.5519	Intracellular	0.9638	0	0.0362	2.00179	0.000219895	-4.64588	-2.26413	+		+	96179000	17086500	4572910	679531	4	2	29	25	27	31	0	3	2	0	4	814460000	983300000	1035200000	767620000	0	34343000
B0BMS8;Q64122	Myosin regulatory light polypeptide 9	Myl9	11	6	5	79.7	19.854	0	59.311	1384800000	49					UPS	0.5519	Intracellular	0.981	0	0.019	3.03367	0	-4.83803	-3.02376	+		+	38961800	6098400	10094700	NA	4	1	13	13	9	9	0	2	2	0	1	318980000	464100000	288960000	286830000	0	9374500
G3V9Y1;Q9JLT0	Myosin-10	Myh10	109	87	81	58.8	229	0	323.31	11900000000	418					Intracellular	0.7344	Intracellular	0.9434	0.0001	0.0565	4.28216	0	-5.5467	-4.12488	+		+	341593000	7123370	176830000	3047020	4	4	69	90	130	117	0	5	1	3	3	2043600000	2430000000	4348800000	2955900000	0	37809000
A0A0G2K6S9;E9PTU4;Q63862	Myosin-11	Myh11	97	79	78	52.1	228.04	0	323.31	5417800000	226					Intracellular	0.6479	Intracellular	0.9914	0	0.0086	0.839125	0.00145113	-3.98352	-1.25371	+		+	162306000	13491600	182862000	5261440	4	2	105	92	4	3	0	11	11	0	0	2608700000	2589200000	45500000	15860000	0	76436000
G3V6P7;Q62812;A0A0G2K484;F1LMU0;G3V6D8;A0A0G2K0F5;B6RK61;F1LRV9;Q29RW1;P12847	Myosin-9	LOC100911597;Myh9	172	172	146	70.7	226.41	0	323.31	124000000000	2119					Intracellular	0.6013	Intracellular	0.9881	0	0.0119	2.02982	0.000201923	-3.8963	-2.12367	+		+	3170520000	333211000	289223000	210902000	4	4	449	447	462	536	0	79	69	8	69	27200000000	29100000000	31700000000	32800000000	39494000	1394400000
P62775	Myotrophin	Mtpn	2	2	2	32.2	12.861	0	14.28	257320000	7					UPS	0.5944	Intracellular	0.9085	0.0688	0.0227	2.18249	0.000421846	-2.24848	-1.66267	+		+	6876880	3688600	2185300	NA	4	1	2	3	1	1	0	0	0	0	0	60033000	78945000	78067000	32234000	0	6563000
F1LMW7;P30009	Myristoylated alanine-rich C-kinase substrate	Marcks	8	8	8	39.8	29.959	0	323.31	833200000	33					Intracellular	0.5923	Intracellular	0.9772	0.0001	0.0227	3.15573	0	-4.45042	-2.97123	+		+	24820200	NA	15302600	NA	4	0	9	13	3	8	0	0	0	0	0	244570000	393400000	74917000	120310000	0	0
O08557	N(G),N(G)-dimethylarginine dimethylaminohydrolase 1	Ddah1	8	8	8	46.3	31.426	0	62.324	664810000	38					UPS	0.5519	Intracellular	0.8095	0.0574	0.1331	0.718779	0.0288145	-1.24819	-0.757779	+		+	15354700	11469300	2619280	1365960	4	3	7	8	4	8	0	5	2	0	4	132450000	137550000	136740000	175900000	0	27556000
Q6MG60	N(G),N(G)-dimethylarginine dimethylaminohydrolase 2	Ddah2	5	5	5	37.2	29.688	0	24.731	230410000	18					UPS	0.5118	Intracellular	0.9593	0.0017	0.0391	1.50432	0.00787421	-1.18142	-0.966421	+		+	5545930	3481950	1458380	661356	4	2	6	6	4	0	0	1	0	0	1	65563000	80908000	50066000	21269000	0	3449000
P81799	N-acetyl-D-glucosamine kinase	Nagk	8	8	8	50.4	37.196	0	164.34	245610000	22					UPS	0.5681	Intracellular	0.9385	0.0004	0.0611	3.55633	0.000108108	-3.68652	-2.86327	+		+	7206630	NA	383443	NA	4	0	5	9	3	5	0	0	0	0	0	74365000	51955000	75193000	44096000	0	0
A0A0G2K4H6;Q32KJ6	N-acetylgalactosamine-6-sulfatase	Galns	6	6	6	22.2	58.12	0	17.407	170690000	14	+			+	Signal-peptide	0.7349	Signal-peptide	0.0407	0.7349	0.2244	3.60938	0.000217335	-2.53756	-2.24917	+		+	4956220	NA	1618240	NA	4	0	4	7	1	2	0	0	0	0	0	49613000	58599000	23242000	34750000	0	3297600
P51607	N-acylglucosamine 2-epimerase	Renbp	5	5	5	14.9	49.604	0	12.791	74859000	11					Intracellular	0.5458	Intracellular	0.9036	0.0001	0.0963	1.25401	0.0344606	-0.843582	-0.729533	+		+	1939750	1706400	263045	NA	4	1	2	4	5	0	0	0	0	0	0	18425000	24364000	19436000	9279100	0	3354300
Q5M963;P69060	N-acylneuraminate cytidylyltransferase	Cmas	2	2	2	6.7	48.14	0	5.8464	55419000	10					Intracellular	0.6746	Intracellular	0.7958	0.0056	0.1986	2.72867	0.00168875	-1.26682	-1.2181	+		+	1622080	NA	327258	NA	4	0	2	2	3	3	0	0	0	0	0	8682700	16042000	17602000	13093000	0	0
P05982	NAD(P)H dehydrogenase [quinone] 1	Nqo1	20	20	20	87.6	30.946	0	211.76	4813300000	144					UPS	0.6368	Intracellular	0.906	0.0177	0.0763	0.613262	0.0128277	-2.35289	-0.898041	+		+	129013000	59427000	74551800	14124200	4	3	40	39	4	28	0	16	6	0	11	1412800000	1326300000	130010000	1420000000	0	158670000
B0BNM1	NAD(P)H-hydrate epimerase	Apoa1bp	6	6	6	30.5	30.89	0	25.287	123120000	18					Signal-peptide	0.8643	Signal-peptide	0.0859	0.8643	0.0498	2.23169	0.000875	-1.83781	-1.4815	+		+	3600680	NA	1164380	NA	4	0	6	5	4	3	0	0	0	0	0	35778000	35545000	25544000	24674000	0	0
Q561S0;A0A1W2Q6F8	NADH dehydrogenase [ubiquinone] 1 alpha subcomplex subunit 10, mitochondrial	Ndufa10	5	5	5	28.7	40.493	0	27.249	167030000	20					Intracellular	0.5346	Intracellular	0.7393	0.1765	0.0842	2.58893	0.00030205	-2.47394	-1.90341	+		+	4812900	NA	520965	NA	4	0	3	4	8	5	0	0	0	0	0	41114000	15765000	81026000	29120000	0	0
Q5BK63	NADH dehydrogenase [ubiquinone] 1 alpha subcomplex subunit 9, mitochondrial	Ndufa9	5	5	5	22.5	42.559	0	20.688	76512000	22					Transmembrane	0.5582	Transmembrane	0.3994	0.0424	0.5582	0.984541	0.0453493	-0.852518	-0.684975	+		+	2254580	NA	917430	NA	4	0	7	5	7	3	0	0	0	0	0	31766000	18924000	18119000	7702300	0	0
P19234	NADH dehydrogenase [ubiquinone] flavoprotein 2, mitochondrial	Ndufv2	3	3	3	16.5	27.378	0	16.383	76371000	13					Intracellular	0.6131	Intracellular	0.924	0.0072	0.0688	1.26318	0.01165	-1.19059	-0.91609	+		+	2225100	NA	523056	NA	4	0	5	3	3	2	0	0	0	0	0	17249000	24448000	14380000	20294000	0	0
Q641Y2	NADH dehydrogenase [ubiquinone] iron-sulfur protein 2, mitochondrial	Ndufs2	5	5	5	20.1	52.561	0	8.2699	103250000	15					Intracellular	0.557	Intracellular	0.9408	0.006	0.0532	2.39273	0.000573503	-1.91946	-1.56648	+		+	2920800	NA	522871	NA	4	0	3	3	5	4	0	0	0	0	0	27376000	30812000	27264000	17794000	0	0
P20070	NADH-cytochrome b5 reductase 3;NADH-cytochrome b5 reductase 3 membrane-bound form;NADH-cytochrome b5 reductase 3 soluble form	Cyb5r3	13	13	13	75.7	34.174	0	126.01	2101800000	76					UPS	0.5507	Intracellular	0.5169	0.2295	0.2535	6.41547	0	-5.87993	-5.60194	+		+	60637000	NA	15477600	NA	4	0	19	19	16	22	0	0	0	0	0	516020000	760640000	371460000	453650000	0	0
G3V9S0;Q5EB81	NADH-cytochrome b5 reductase;NADH-cytochrome b5 reductase 1	Cyb5r1	14	14	14	61.6	34.232	0	108.72	1272200000	51		+			Transmembrane	0.7569	Transmembrane	0.0218	0.2213	0.7569	4.52609	0	-5.51968	-4.27388	+		+	37884500	NA	8779750	NA	4	0	11	15	15	10	0	0	0	0	0	291300000	361870000	251420000	367660000	0	0
Q66HF1	NADH-ubiquinone oxidoreductase 75 kDa subunit, mitochondrial	Ndufs1	12	12	12	26.3	79.411	0	61.702	480700000	53					Intracellular	0.5864	Intracellular	0.8937	0.0002	0.1061	3.92054	0	-4.19749	-3.28592	+		+	13551500	NA	1182440	NA	4	0	14	11	16	12	0	0	0	0	0	104040000	98417000	138760000	119010000	0	6365100
P00388	NADPH--cytochrome P450 reductase	Por	8	8	8	17.8	76.962	0	24.856	139700000	15		+			Transmembrane	0.9964	Transmembrane	0.0035	0.0001	0.9964	2.35483	0.000359848	-2.15884	-1.67717	+		+	4104500	NA	826063	NA	4	0	2	5	7	1	0	0	0	0	0	23743000	34019000	43764000	38169000	0	0
F1LSM5;P55161	Nck-associated protein 1	Nckap1	9	9	9	16.2	124.62	0	51.79	275420000	44		+			Intracellular	0.5001	Intracellular	0.9554	0.0051	0.0395	3.89787	0.00010566	-3.37901	-2.84449	+		+	7765420	NA	1643800	NA	4	0	8	12	14	10	0	0	0	0	0	66355000	51087000	84309000	71733000	0	1930500
Q99MI7	NEDD8-activating enzyme E1 catalytic subunit	Uba3	5	5	5	26.2	51.723	0	30.976	81879000	16					Intracellular	0.5677	Intracellular	0.7999	0.0008	0.1993	0.878457	0.0494386	-0.875924	-0.672203	+		+	2203800	1310000	601242	NA	4	1	7	3	3	3	0	0	0	0	0	22269000	14051000	14729000	28385000	0	770690
A0A0H2UHX5;P07861	Neprilysin	Mme	4	4	4	9.8	78.668	0	13.639	74814000	11		+			Intracellular	0.5399	Intracellular	0.9951	0	0.0049	1.07719	0.0178355	-1.12748	-0.83872	+		+	2145370	NA	1383920	NA	4	0	1	1	5	4	0	0	0	0	0	4630200	9199400	40632000	20352000	0	0
Q6IUR5	Neudesin	Nenf	5	5	5	39.8	18.991	0	8.9422	92288000	15	+			+	Signal-peptide	0.7761	Signal-peptide	0.004	0.7761	0.2198	6.03448	0.000102004	-2.59378	-2.79605	+		+	2682000	NA	420133	NA	4	0	5	2	5	3	0	0	0	0	0	21746000	18828000	35410000	16304000	0	0
F1LNY3;P13596;A0A0G2K0M8	Neural cell adhesion molecule 1	Ncam1	20	20	1	43.6	92.72	0	149.68	2337700000	114	+	+			Intracellular	0.6779	Intracellular	0.9067	0.0001	0.0932	2.21493	0.00267164	-1.24476	-1.13072	+		+	55402800	23785500	14690200	7857060	4	4	18	25	22	31	0	3	5	7	3	427720000	572030000	531860000	605100000	0	35055000
A0A0G2JVK4;A0A0G2JSY3;P42676	Neurolysin, mitochondrial	Nln	6	6	6	12.5	77.801	0	19.925	672960000	18					Intracellular	0.5668	Intracellular	0.7618	0.0041	0.2341	4.28379	0	-4.18441	-3.45635	+		+	19429500	NA	2250800	NA	4	0	5	5	3	5	0	0	0	0	0	165300000	182940000	209730000	107170000	0	1373900
B2GV54	Neutral cholesterol ester hydrolase 1	Nceh1	4	4	4	24	45.821	0	21.072	112800000	15		+			Transmembrane	0.6439	Transmembrane	0.0017	0.3544	0.6439	3.05266	0.000496732	-1.79046	-1.63719	+		+	3287220	NA	486834	NA	4	0	2	4	7	2	0	0	0	0	0	26771000	17759000	43871000	24399000	0	0
A0A0G2K6I3;Q9Z2J4	Nexilin	Nexn	10	10	10	25.2	79.854	0	65.632	189750000	23					Intracellular	0.8798	Intracellular	0.9934	0	0.0066	2.94868	0.00019222	-2.50951	-2.03896	+		+	5650550	NA	1042460	NA	4	0	7	7	4	5	0	0	0	0	0	50017000	76818000	24954000	37965000	0	0
P55770	NHP2-like protein 1;NHP2-like protein 1, N-terminally processed	Nhp2l1	3	3	3	46.9	14.173	0	4.9954	178300000	10					UPS	0.5363	Intracellular	0.9153	0.0018	0.083	2.29067	0.00019244	-3.10545	-2.03898	+		+	5266770	NA	910218	NA	4	0	2	4	1	3	0	0	0	0	0	41264000	56870000	41053000	39117000	0	0
B4F7E8	Niban-like protein 1	Fam129b	12	12	12	28	84.73	0	106.22	441070000	51					Intracellular	0.7166	Intracellular	0.8673	0	0.1327	1.8601	0.000871972	-2.06479	-1.47461	+		+	11461700	4077670	1994350	798453	4	3	7	10	12	13	0	5	2	0	2	104310000	110670000	93011000	100270000	0	21902000
A0A0H2UHD9;Q5XIA1	Nicalin	Ncln	4	4	4	10.1	62.863	0	14.205	58525000	8	+	+			Transmembrane	0.7982	Transmembrane	0.0079	0.1939	0.7982	0.433686	0.168155	-0.72803	-0.470098				2129770	NA	801545	NA	3	0	3	1	2	2	0	0	0	0	0	19557000	3122900	27834000	8011200	0	0
B3DM90;Q8CGU6	Nicastrin	Ncstn	6	6	6	19.4	67.169	0	29.114	104800000	21	+	+			Intracellular	0.5523	Intracellular	0.9133	0.0069	0.0798	2.7294	0.000825737	-1.73435	-1.53693	+		+	3037700	NA	543528	NA	4	0	2	6	7	6	0	0	0	0	0	14764000	23729000	43044000	23264000	0	0
Q5FVQ8;A0A0G2K1Q1	NLR family member X1	Nlrx1	10	10	10	18.6	107.59	0	47.182	247210000	31					Intracellular	0.8638	Intracellular	0.8408	0.0019	0.1573	3.41587	8.67e-05	-3.12314	-2.5224	+		+	7392750	NA	2185080	NA	4	0	9	10	4	8	0	0	0	0	0	72304000	86327000	28776000	59469000	338520	0
G3V9E3;Q62736;A0A0G2JTV2	Non-muscle caldesmon	Cald1	29	29	29	46.1	60.611	0	323.31	17400000000	167					Intracellular	0.8798	Intracellular	0.9762	0.0004	0.0234	3.46229	0	-6.29521	-3.77852	+		+	493565000	11940100	96037000	6771260	4	3	37	45	33	42	0	3	2	0	5	4314400000	5388500000	3709800000	3924500000	0	32161000
Q5FVM4	Non-POU domain-containing octamer-binding protein	Nono	7	6	6	28.6	54.925	0	67.046	382130000	30					Intracellular	0.8798	Intracellular	0.7806	0.0001	0.2193	5.801	0	-3.98906	-3.93011	+		+	11272300	NA	1088850	NA	4	0	8	7	5	8	0	2	0	0	0	108410000	110220000	82592000	79463000	0	1448800
Q6AXQ3;A0A0G2K2V7;F1LM93	Non-specific protein-tyrosine kinase;Tyrosine-protein kinase Yes	Yes1	7	7	7	25.6	54.269	0	16.623	137920000	18					UPS	0.5232	Intracellular	0.8261	0.0005	0.1734	2.38338	0.000292581	-2.55124	-1.86511	+		+	4038330	NA	366617	NA	4	0	4	3	7	4	0	0	0	0	0	7714200	40459000	46445000	43298000	0	0
A0A0G2K5Z1;G3V6C9;O54874	Non-specific serine/threonine protein kinase;Serine/threonine-protein kinase MRCK alpha	Cdc42bpa	10	10	10	10.9	186.78	0	20.381	145500000	13					Intracellular	0.7899	Intracellular	0.9233	0.0013	0.0754	2.43961	0.000343207	-2.43897	-1.83591	+		+	4167350	NA	2000880	NA	4	0	0	0	12	1	0	0	0	0	0	18625000	28177000	72898000	25803000	0	0
A0A0G2K911;O35987	NSFL1 cofactor p47	Nsfl1c	5	5	5	23.2	37.249	0	14.089	165320000	15					UPS	0.5445	Intracellular	0.9207	0.0014	0.0779	3.08014	0.000195349	-2.48929	-2.06863	+		+	4862080	NA	368169	NA	4	0	3	2	5	5	0	0	0	0	0	25096000	37608000	52769000	49842000	0	0
Q5M9F8	N-terminal kinase-like protein	Scyl1	4	4	4	12.9	89.125	0	14.556	50266000	8					Intracellular	0.5457	Intracellular	0.8355	0	0.1645	0.315058	0.289173	-0.526579	-0.349587				1103720	NA	56568.8	NA	4	0	1	4	2	0	0	1	0	0	0	7824200	11057000	9053100	9408300	0	4844200
O70187;O70186;O70185	Nuclear factor 1	Nfib	3	3	2	13.3	47.498	0	4.8733	120850000	5					Intracellular	0.7132	Intracellular	0.8489	0	0.1511	1.33133	0.0171683	-1.02338	-0.846036	+		+	2274700	NA	524299	NA	3	0	3	2	0	0	0	0	0	0	0	25814000	23575000	8447100	19543000	0	8303000
Q66HC5	Nuclear pore complex protein Nup93	Nup93	3	3	3	10.3	93.301	0	65.644	72729000	10					Intracellular	0.5691	Intracellular	0.9466	0.0001	0.0534	1.01358	0.0263713	-1.01654	-0.771784	+		+	2120970	NA	1187390	NA	4	0	2	3	3	2	0	0	0	0	0	21765000	5548900	29771000	15644000	0	0
Q9ES54;F1LQX9;A0A0G2JU66	Nuclear protein localization protein 4 homolog	Nploc4	4	4	4	12.8	68.055	0	6.8713	98844000	10					Intracellular	0.659	Intracellular	0.8018	0	0.1981	2.86851	0.000341117	-2.16381	-1.82615	+		+	2868200	NA	505939	NA	4	0	1	2	2	5	0	0	0	0	0	14243000	15688000	33263000	34156000	0	1493300
P61972	Nuclear transport factor 2	Nutf2	2	2	2	40.9	14.478	0	24.756	65714000	11					UPS	0.6182	Intracellular	0.9483	0.0001	0.0515	0.369707	0.228324	-0.620605	-0.406064				2286000	NA	139319	NA	3	0	3	2	3	3	0	0	0	0	0	19850000	7663100	20828000	17372000	0	0
P62961;Q3ZAV2;D3ZEV0	Nuclease-sensitive element-binding protein 1	Ybx1;LOC100912427	12	12	11	59.6	35.73	0	301.4	1896800000	59					Intracellular	0.9345	Intracellular	0.7904	0.0017	0.2078	3.81896	0	-5.5228	-3.79595	+		+	54715300	NA	8785450	NA	4	0	15	14	15	15	0	0	0	0	0	417200000	464620000	663050000	343860000	0	4386200
Q9JI85;G3V8R1	Nucleobindin-2;Nesfatin-1	Nucb2	11	11	11	33.1	50.09	0	50.385	706200000	60	+			+	Signal-peptide	0.6626	Signal-peptide	0.206	0.6626	0.1314	0.711138	0.420353	-0.248216	-0.255902				15645500	13224700	2248760	2290670	4	4	11	7	9	8	0	8	2	11	4	98761000	142840000	186400000	118260000	0	54230000
Q9QZ86;Q5PPK6	Nucleolar protein 58	Nop58	6	6	6	14.6	60.07	0	92.469	235650000	14					Intracellular	0.6305	Intracellular	0.978	0.0176	0.0044	2.93521	0.000335329	-2.05872	-1.78166	+		+	5348630	NA	806361	NA	4	0	3	7	1	3	0	0	0	0	0	55383000	63846000	30186000	30833000	0	26347000
M0R965;Q3B8Q1	Nucleolar RNA helicase 2	Ddx21	4	4	4	9.7	85.981	0	7.4475	140390000	9					Intracellular	0.7898	Intracellular	0.9673	0.0001	0.0326	0.813966	0.0299651	-1.11111	-0.750656	+		+	5084800	NA	2508280	NA	3	0	2	2	2	3	0	0	0	0	0	8619600	20071000	64327000	47370000	0	0
Q5U328;P13383	Nucleolin	Ncl	19	19	19	30.7	77.276	0	323.31	3120000000	112					Intracellular	0.747	Intracellular	0.9132	0.0001	0.0866	1.78241	0.000192	-4.27337	-2.03804	+		+	87246000	12452500	2880090	8850760	4	3	25	28	23	24	0	3	1	0	8	751480000	850860000	703880000	716820000	0	19538000
P13084;D3ZXI2;D3ZP59;F7FKF2	Nucleophosmin	Npm1	10	10	10	47.3	32.56	0	171.47	1840500000	68					UPS	0.5956	Intracellular	0.9715	0	0.0284	3.54935	0	-5.66159	-3.6505	+		+	50848000	NA	5682570	NA	4	0	19	12	14	19	0	2	1	0	1	429790000	462740000	470200000	458030000	4236200	3513400
F1MA98	Nucleoprotein TPR	Tpr	6	6	6	4.2	267.3	0	15.323	126670000	14					Intracellular	0.6856	Intracellular	0.9607	0	0.0393	1.47508	0.00145	-1.84586	-1.25371	+		+	3653270	NA	448319	NA	4	0	5	3	4	2	0	0	0	0	0	23084000	32254000	52888000	18444000	0	0
Q05982	Nucleoside diphosphate kinase A	Nme1	10	10	4	67.8	17.193	0	100.64	6364400000	81					UPS	0.573	Intracellular	0.9587	0	0.0412	0.823264	0.0223574	-1.24503	-0.800672	+		+	149152000	81536500	28204600	46534100	4	4	14	11	16	15	0	10	6	0	9	1260000000	970620000	1971300000	1114300000	0	354670000
P19804	Nucleoside diphosphate kinase B	Nme2	9	3	3	62.5	17.283	0	18.457	1717900000	28					UPS	0.571	Intracellular	0.9444	0	0.0555	1.03565	0.00218622	-2.21092	-1.16112	+		+	42023200	17707800	22124200	8263720	4	3	4	1	13	3	0	2	3	0	2	219980000	297030000	654090000	423080000	0	29959000
G3V6H9;Q9Z2G8;D4AEJ0	Nucleosome assembly protein 1-like 1	Nap1l1	9	9	8	47.1	45.373	0	211.51	464520000	37					Intracellular	0.6787	Intracellular	0.8537	0.0003	0.146	2.35786	0.000159544	-4.12688	-2.38553	+		+	12797300	3630600	4045480	NA	4	1	11	8	8	9	0	0	0	0	1	107530000	143970000	89444000	116680000	0	1330900
Q5U2Z3;A0A0H2UHZ2	Nucleosome assembly protein 1-like 4	Nap1l4	7	6	6	33.2	43.916	0	38.162	218510000	26					Intracellular	0.6064	Intracellular	0.8323	0.0003	0.1674	2.31621	0.0002	-3.25757	-2.10294	+		+	6476200	NA	704087	NA	4	0	6	7	6	7	0	0	0	0	0	51313000	59695000	50406000	57095000	0	0
A0JPJ7	Obg-like ATPase 1	Ola1	5	5	5	23.5	44.535	0	22.404	291500000	25					UPS	0.5205	Intracellular	0.9616	0.0002	0.0382	2.03356	0.000497196	-2.31624	-1.63819	+		+	7761180	4075100	1159740	NA	4	1	7	3	5	6	0	2	1	0	1	61865000	61293000	80190000	84350000	0	3341100
Q5XIG4	OCIA domain-containing protein 1	Ociad1	5	5	5	41.7	27.659	0	220.13	175570000	21					Transmembrane	0.5935	Transmembrane	0.4055	0.001	0.5935	1.54143	0.00128835	-1.93338	-1.31019	+		+	5204370	NA	860559	NA	4	0	5	6	6	4	0	0	0	0	0	50898000	56607000	33903000	34158000	0	0
A0A0G2K038;Q5U1X1	Oligoribonuclease, mitochondrial	Rexo2	5	5	5	17.7	28.721	0	31.204	450410000	37					UPS	0.5539	Intracellular	0.9015	0.002	0.0965	3.44292	0.000160229	-2.86357	-2.39192	+		+	12422800	1889770	2088520	1257200	4	3	9	9	8	6	0	2	1	0	2	87216000	109530000	121670000	118230000	0	7249600
Q497B0	Omega-amidase NIT2	Nit2	4	4	4	35.5	30.701	0	99.717	65844000	15					UPS	0.5585	Intracellular	0.8569	0.0953	0.0478	1.57331	0.0104088	-1.0943	-0.931278	+		+	1817350	NA	687915	NA	4	0	3	3	5	4	0	0	0	0	0	6599700	12447000	22207000	20700000	0	0
P04182	Ornithine aminotransferase, mitochondrial	Oat	22	22	22	72	48.332	0	323.31	6410600000	203					Intracellular	0.5634	Intracellular	0.8802	0.0155	0.1043	2.36675	0.00016185	-4.21	-2.41312	+		+	173170000	16707000	59380600	4189970	4	3	49	48	34	60	0	4	3	0	5	1696500000	1931100000	815900000	1882200000	0	30393000
Q6P686	Osteoclast-stimulating factor 1	Ostf1	2	2	2	17.8	23.668	0	13.243	81368000	13					Intracellular	0.5536	Intracellular	0.9998	0	0.0002	0.729485	0.0738382	-0.831213	-0.6124				2573000	NA	149771	NA	3	0	3	3	4	1	0	1	1	0	0	19585000	22639000	24894000	9872900	0	1197300
F1M265;P0C5E3;D4A7X7;A0A0G2K046	Palladin	Palld	32	32	32	48.9	108.34	0	323.31	4191900000	181					Intracellular	0.6538	Intracellular	0.8549	0.01	0.1351	4.61609	0	-6.47442	-4.77406	+		+	119023000	2568550	15603500	360978	4	2	36	53	44	45	0	1	1	0	1	815480000	1116900000	1305900000	929070000	0	12505000
P45479	Palmitoyl-protein thioesterase 1	Ppt1	6	6	6	31.4	34.455	0	20.36	266530000	27	+			+	Signal-peptide	0.5905	Signal-peptide	0.1363	0.5905	0.2733	0.670192	0.0277893	-1.35483	-0.763628	+		+	6732730	3622270	3963980	1908360	4	3	5	5	2	6	0	2	1	3	3	72488000	83479000	4862100	79111000	0	2633700
A0A0G2JYN7;Q4KLH4	Paraspeckle component 1	Pspc1	3	3	3	11.6	52.879	0	7.2817	52585000	9					Intracellular	0.9307	Intracellular	0.8072	0.0403	0.1525	2.43422	0.00130696	-1.40652	-1.27224	+		+	1558700	NA	200764	NA	4	0	4	1	2	2	0	0	0	0	0	12892000	8440500	14820000	16432000	0	0
P52944	PDZ and LIM domain protein 1	Pdlim1	17	17	17	80.7	35.584	0	323.31	5837700000	162					UPS	0.6164	Intracellular	0.979	0.0047	0.0163	1.89672	0.000344262	-3.0931	-1.83956	+		+	157191000	30842300	55348000	6242560	4	3	31	37	24	43	0	11	5	0	11	1491500000	1685100000	778710000	1725800000	0	51535000
M0R4H5;P36202	PDZ and LIM domain protein 4	Pdlim4	7	7	7	33	35.564	0	33.642	511110000	29					Intracellular	0.9342	Intracellular	0.9938	0.0009	0.0053	3.24651	8.72e-05	-3.26761	-2.5277	+		+	14895300	NA	3209110	NA	4	0	10	6	8	5	0	0	0	0	0	134140000	152860000	160830000	63283000	0	0
Q62920	PDZ and LIM domain protein 5	Pdlim5	23	23	23	54.8	63.201	0	317.82	4197400000	147					UPS	0.5001	Intracellular	0.9977	0.0005	0.0018	1.05613	0.00109746	-3.22088	-1.35239	+		+	107784000	35680700	14106500	12981500	4	3	30	35	35	31	0	11	3	0	2	1062400000	1082500000	1061600000	760360000	0	118090000
Q9Z1Z9	PDZ and LIM domain protein 7	Pdlim7	15	15	15	53.6	49.912	0	138.91	2221900000	98					Intracellular	0.5448	Intracellular	0.8863	0.0004	0.1133	3.31313	0	-4.70309	-3.15802	+		+	64492800	4123600	8537320	2256610	4	3	21	17	30	26	0	2	1	0	1	461130000	518500000	693730000	487580000	11282000	13644000
Q6AYQ9	Peptidyl-prolyl cis-trans isomerase	Ppic	10	10	10	69.3	23.009	0	109.32	2185900000	102	+			+	Signal-peptide	0.5889	Signal-peptide	0.2656	0.5889	0.1456	0.189405	0.578754	0.209448	0.16972				40601800	50260700	13500000	29303300	4	4	8	9	21	22	0	5	5	20	12	275070000	290680000	545040000	424970000	1409800	68029000
G3V6L9	Peptidyl-prolyl cis-trans isomerase	Fkbp3	6	6	6	41.1	25.178	0	16.976	290900000	16					UPS	0.6367	Intracellular	0.9468	0	0.0532	3.81605	8.74e-05	-2.89	-2.52817	+		+	8553000	NA	2001580	NA	4	0	3	4	5	4	0	0	0	0	0	73726000	82413000	60862000	71182000	0	2714800
D3ZZR9	Peptidyl-prolyl cis-trans isomerase	Fkbp2	5	5	5	50	15.388	0	10.895	355270000	23	+			+	Signal-peptide	0.9182	Signal-peptide	0.0024	0.9182	0.0793	2.7676	0.000151556	-3.2693	-2.32109	+		+	10038200	2297300	2900680	NA	4	1	5	7	6	5	0	0	0	0	0	97687000	116030000	84966000	48333000	0	3458800
P10111;A0A0G2K1P0;A0A0G2K2E4;M0RCZ9	Peptidyl-prolyl cis-trans isomerase A;Peptidyl-prolyl cis-trans isomerase A, N-terminally processed	Ppia	13	13	13	71.3	17.874	0	323.31	14500000000	338					UPS	0.6164	Intracellular	0.9339	0.0001	0.0661	1.76404	0.00109656	-1.84472	-1.35084	+		+	311507000	99842000	77583700	51198900	4	4	58	60	95	51	0	30	19	6	19	3090900000	3004100000	4724500000	2416800000	0	455960000
P24368	Peptidyl-prolyl cis-trans isomerase B	Ppib	12	12	12	57.9	23.802	0	92.311	7584900000	127	+			+	Transmembrane	0.8292	Transmembrane	0.0596	0.1112	0.8292	2.81019	0.00111574	-1.48697	-1.38774	+		+	182135000	67532000	21572400	21342400	4	4	21	22	24	26	0	11	8	4	11	1631200000	1941100000	2109900000	1209500000	423490	204150000
Q6DGG0;M0RB67	Peptidyl-prolyl cis-trans isomerase D	Ppid;Ppidl1	4	4	4	12.4	40.765	0	6.4577	90474000	11					UPS	0.534	Intracellular	0.8303	0.0001	0.1696	0.631757	0.0752182	-0.902533	-0.609287				2412880	1479900	822469	NA	4	1	2	3	2	4	0	0	0	0	0	18588000	34189000	22244000	13171000	0	0
Q62658	Peptidyl-prolyl cis-trans isomerase FKBP1A	Fkbp1a	3	3	3	54.6	11.922	0	7.2456	355800000	13					UPS	0.5508	Intracellular	0.9737	0	0.0262	2.61722	0.000157525	-3.59316	-2.36957	+		+	10308500	NA	3815780	NA	4	0	3	4	3	3	0	0	0	0	0	99196000	76795000	137510000	42306000	0	0
Q9QVC8	Peptidyl-prolyl cis-trans isomerase FKBP4;Peptidyl-prolyl cis-trans isomerase FKBP4, N-terminally processed	Fkbp4	4	4	4	12.2	51.45	0	6.5844	168480000	10					Intracellular	0.5642	Intracellular	0.8423	0.0002	0.1574	3.50574	0.000213469	-2.53734	-2.22039	+		+	5025930	NA	930126	NA	4	0	5	3	0	2	0	0	0	0	0	66032000	68162000	15308000	18979000	0	0
Q3B7U9	Peptidyl-prolyl cis-trans isomerase FKBP8	Fkbp8	2	2	2	11.2	43.555	0	33.584	44680000	19		+			Intracellular	0.5204	Intracellular	0.8395	0.0098	0.1507	1.4181	0.0172207	-0.993286	-0.845161	+		+	1307010	NA	617021	NA	4	0	4	3	6	6	0	0	0	0	0	11578000	16475000	11579000	5047000	0	0
Q66H94	Peptidyl-prolyl cis-trans isomerase FKBP9	Fkbp9	15	15	15	31.4	63.126	0	28.608	2010000000	62	+			+	Signal-peptide	0.9936	Signal-peptide	0.0002	0.9936	0.0062	2.75652	9.69e-05	-4.37271	-2.70256	+		+	57437300	4849900	7992740	720817	4	3	9	15	19	18	0	1	0	0	0	415740000	571720000	589120000	391140000	0	15949000
M0RA08	Perilipin	Plin3	8	8	8	43.8	47.343	0	83.103	390640000	35					Intracellular	0.5914	Intracellular	0.7049	0.0003	0.2948	5.7584	0	-3.29357	-3.35912	+		+	11430900	NA	2149100	NA	4	0	8	6	11	10	0	0	0	0	0	76929000	99100000	127760000	86856000	0	0
A0A0G2K3Z9;Q63716	Peroxiredoxin-1	Prdx1	16	16	15	69.8	22.164	0	78.374	6711900000	119					UPS	0.6176	Intracellular	0.6972	0.0181	0.2847	0.783602	0.00459587	-2.43442	-1.04116	+		+	171925000	94248600	9745120	26948700	4	3	25	22	19	16	0	13	11	0	13	1610100000	1595500000	1630900000	1004700000	0	288900000
A0A0G2JSH9;P35704	Peroxiredoxin-2	Prdx2	10	10	10	54	21.797	0	47.708	2498500000	61					UPS	0.6168	Intracellular	0.7343	0.0103	0.2554	1.11555	0.00625989	-1.51083	-1.00219	+		+	61955500	26894000	15362600	15540300	4	4	13	15	12	11	0	4	3	0	3	448050000	602480000	675890000	491110000	0	104880000
Q9Z0V5	Peroxiredoxin-4	Prdx4	10	9	9	54.2	31.007	0	51.466	2660000000	85	+			+	Signal-peptide	0.6681	Signal-peptide	0.0492	0.6681	0.2827	1.19117	0.00128013	-2.45738	-1.30262	+		+	62935800	24398000	2584490	3113280	4	3	15	20	17	17	0	3	5	1	7	596680000	706340000	652480000	507650000	3056000	62740000
A0A0G2JSS8;Q9R063	Peroxiredoxin-5, mitochondrial	Prdx5	14	14	14	62	22.206	0	184.01	3244300000	101	+			+	UPS	0.6349	Intracellular	0.4782	0.3029	0.2189	1.27138	0.00152767	-2.09616	-1.25174	+		+	86047500	28115800	14526100	17189700	4	4	16	17	20	18	0	11	9	3	7	791720000	797010000	621660000	695490000	6095000	125260000
O35244	Peroxiredoxin-6	Prdx6	9	9	9	55.4	24.818	0	56.393	1110000000	45					UPS	0.6367	Intracellular	0.853	0.0009	0.1461	0.860831	0.00509609	-2.06922	-1.03008	+		+	26800000	13125000	14356300	236466	4	3	12	6	14	6	0	2	0	0	5	176590000	193890000	489440000	144970000	0	24963000
Q6IN39;P97852	Peroxisomal multifunctional enzyme type 2;(3R)-hydroxyacyl-CoA dehydrogenase;Enoyl-CoA hydratase 2	Hsd17b4	12	12	12	32.9	81.088	0	51.762	475470000	43					Intracellular	0.5453	Intracellular	0.8379	0.0043	0.1579	4.45957	0	-4.68831	-3.81559	+		+	14195800	NA	3906570	NA	4	0	8	14	7	14	0	0	0	0	0	106610000	143810000	82541000	142510000	0	0
Q505J8	Phenylalanine--tRNA ligase alpha subunit	Farsa	9	9	9	29.9	57.719	0	43.82	274360000	21					Intracellular	0.5511	Intracellular	0.9923	0.0001	0.0076	4.53566	0	-3.81497	-3.35116	+		+	8022600	NA	926868	NA	4	0	2	5	4	8	0	1	0	0	1	54643000	65590000	72457000	78592000	0	695800
G3V741;Q6IRH6;P16036	Phosphate carrier protein, mitochondrial	Slc25a3	12	12	12	59	39.531	0	323.31	4100000000	72		+			Intracellular	0.5105	Intracellular	0.5397	0.1489	0.3115	4.14045	0	-7.09394	-4.61333	+		+	117636000	NA	35755100	NA	4	0	21	23	12	16	0	0	0	0	0	1350300000	1201600000	719540000	823590000	0	0
P31044	Phosphatidylethanolamine-binding protein 1;Hippocampal cholinergic neurostimulating peptide	Pebp1	8	8	8	77.5	20.801	0	135.65	1227800000	64					UPS	0.6182	Intracellular	0.8655	0.0089	0.1256	1.24433	0.00428344	-1.5588	-1.06547	+		+	30674300	12185500	11563300	6485140	4	4	12	12	14	8	0	7	3	1	7	199490000	226440000	474430000	195340000	0	39463000
G3V7B6;P0C089	Phosphatidylglycerophosphatase and protein-tyrosine phosphatase 1	Ptpmt1	3	3	3	15.1	27.529	0	6.9022	35629000	8					Transmembrane	0.4914	Transmembrane	0.4489	0.0597	0.4914	0.508442	0.188764	-0.597227	-0.446081				1442900	NA	188468	NA	3	0	2	3	0	3	0	0	0	0	0	14137000	12709000	0	8783700	0	0
Q9ES21	Phosphatidylinositide phosphatase SAC1	Sacm1l	12	12	12	27.9	67.038	0	81.123	770500000	38		+			Intracellular	0.5455	Intracellular	0.9251	0.0027	0.0721	5.66585	0	-5.2364	-4.77121	+		+	22511300	NA	2226160	NA	4	0	7	8	13	10	0	0	0	0	0	204360000	200960000	244380000	120810000	0	0
A0A140TAJ5;O08662	Phosphatidylinositol 4-kinase alpha	Pi4ka	5	5	5	4.5	231.7	0	8.6614	44384000	16					Intracellular	0.5459	Intracellular	0.8019	0.0044	0.1937	3.53491	0.00100591	-1.41175	-1.42835	+		+	1301800	NA	170408	NA	4	0	3	4	5	4	0	0	0	0	0	15581000	7049000	14319000	7434700	0	0
R9PXS4;P16446	Phosphatidylinositol transfer protein alpha isoform	Pitpna	5	5	4	30.3	31.851	0	21.371	369380000	25					UPS	0.6367	Intracellular	0.9907	0.0005	0.0089	0.943268	0.00444158	-1.94755	-1.05084	+		+	8427050	7106600	1303670	117373	4	2	6	4	5	4	0	1	3	0	2	71020000	73512000	110240000	63056000	0	15595000
D3ZCD4;P53812	Phosphatidylinositol transfer protein beta isoform	Pitpnb	3	2	2	19.5	31.62	0.00045188	4.6246	116720000	7					UPS	0.6368	Intracellular	0.9497	0.0022	0.048	1.24659	0.00233233	-1.81914	-1.15686	+		+	2843500	3313100	175193	NA	4	1	4	1	1	1	0	0	0	0	0	22551000	30004000	24933000	20305000	0	2298200
Q499Q4;P38652	Phosphoglucomutase-1	Pgm1	16	16	16	48	61.389	0	73.801	358690000	43					Intracellular	0.5024	Intracellular	0.9006	0.0001	0.0994	1.59559	0.00103616	-2.18668	-1.42043	+		+	8838270	4442600	2729280	2120470	4	2	8	8	12	11	0	2	2	0	0	61207000	70868000	146420000	63765000	0	3036100
P16617;M0R6Y8;Q5XIV1;A0A096MJL6	Phosphoglycerate kinase 1	Pgk1	25	25	25	73.1	44.538	0	323.31	5761100000	184					Intracellular	0.6574	Intracellular	0.99	0.0051	0.005	1.64216	0.00109477	-1.93366	-1.34655	+		+	144359000	44204500	47034100	24157900	4	4	34	35	46	24	0	15	11	3	16	1308200000	1132100000	2144400000	730130000	0	165900000
P25113;F1M1Y1	Phosphoglycerate mutase 1	Pgam1	15	15	13	73.6	28.832	0	142.27	3653200000	135					UPS	0.5502	Intracellular	0.7065	0.0016	0.2919	0.473654	0.1016	-0.96572	-0.560307				81595300	60296000	12487800	36784500	4	4	34	26	20	19	0	18	5	3	10	843090000	697250000	922620000	534080000	0	248700000
G3V9D1	Phosphoinositide phospholipase C	Plcd1	10	10	1	22.6	85.909	0	94.967	170200000	38					Intracellular	0.5477	Intracellular	0.9497	0	0.0502	1.69742	0.00145341	-1.67048	-1.25409	+		+	4919600	NA	2322010	NA	4	0	5	9	15	9	0	0	0	0	0	28208000	17806000	73706000	49258000	0	0
Q45QJ4;Q99JE6	Phosphoinositide phospholipase C;1-phosphatidylinositol 4,5-bisphosphate phosphodiesterase beta-3	Plcb3	4	4	4	7	139.67	0	10.745	45419000	10					Intracellular	0.8723	Intracellular	0.9149	0.0002	0.0849	0.582349	0.173771	-0.593119	-0.463845				1336100	NA	421592	NA	4	0	2	2	1	4	0	1	0	0	0	13631000	9992700	10617000	10810000	0	0
P54319	Phospholipase A-2-activating protein	Plaa	6	6	6	13.7	87.083	0	14.996	107870000	17					UPS	0.5105	Intracellular	0.8523	0.0108	0.1369	1.31032	0.00377794	-1.54551	-1.08261	+		+	3158520	NA	403679	NA	4	0	2	4	5	5	0	0	0	0	1	18207000	24218000	37073000	28373000	0	0
Q5FVH2	Phospholipase D3	Pld3	6	6	6	19.1	54.399	0	9.8557	84658000	12		+			Transmembrane	0.9985	Transmembrane	0.0001	0.0014	0.9985	2.32696	0.00262069	-1.23105	-1.13818	+		+	2421200	NA	400524	NA	4	0	1	5	5	1	0	0	0	0	0	16774000	20694000	17994000	25896000	0	1140200
B5DF46	Phosphomannomutase	Pmm2	3	3	3	22.7	27.708	0	21.613	95763000	11					UPS	0.5513	Intracellular	0.8398	0.0001	0.1601	2.69847	0.000422243	-1.95427	-1.6627	+		+	2939130	NA	927036	NA	3	0	2	2	5	2	0	0	0	0	0	33423000	19532000	35432000	7375900	0	0
Q6AZ40;O08618	Phosphoribosyl pyrophosphate synthase-associated protein 2	Prpsap2	4	4	4	23.3	31.292	0	8.0499	44797000	11					UPS	0.5519	Intracellular	0.6823	0.0396	0.2781	0.0623762	0.836858	-0.0783134	-0.0628826				1591570	NA	335379	NA	3	0	4	1	2	4	0	0	0	0	0	9802900	3996100	17964000	13034000	0	0
A0A0G2K931;E9PSV5;A0A0G2KAC0	Phosphoserine aminotransferase	Psat1	11	11	11	45.9	39.835	0	24.455	729970000	36					UPS	0.5143	Intracellular	0.9602	0.0001	0.0397	2.57923	0.000149933	-3.44664	-2.29873	+		+	20825200	5362400	3799670	NA	4	1	4	5	12	13	0	0	0	0	2	146940000	176190000	185310000	209820000	0	0
Q64542	Plasma membrane calcium-transporting ATPase 4	Atp2b4	11	11	8	19.5	133.09	0	59.603	230420000	28		+			Intracellular	0.6761	Intracellular	0.9499	0	0.05	1.67406	0.000583564	-2.62986	-1.59483	+		+	8706000	NA	2320920	NA	3	0	8	9	11	0	0	0	0	0	0	50198000	64760000	115460000	0	0	0
Q6AXS5	Plasminogen activator inhibitor 1 RNA-binding protein;Plasminogen activator inhibitor 1 RNA-binding protein, N-terminally processed	Serbp1	4	4	4	15.7	44.754	0	9.7476	103990000	11					Intracellular	0.9347	Intracellular	0.9815	0.0002	0.0183	6.87361	0.000103321	-2.50351	-2.81602	+		+	3047000	NA	250475	NA	4	0	3	2	4	2	0	0	0	0	0	20416000	27548000	32599000	23424000	0	0
F1LPK7;Q63598;Q5XI38;A0A0G2QC04;A0A0G2K014	Plastin-3	Pls3	42	42	42	74	70.748	0	323.31	9632100000	369					UPS	0.5214	Intracellular	0.9978	0	0.0022	0.732871	0.0153571	-1.65159	-0.867839	+		+	235035000	115376000	71100600	75371900	4	4	72	66	41	71	0	37	26	3	53	2220000000	2430200000	1259400000	2310400000	0	455890000
P63004	Platelet-activating factor acetylhydrolase IB subunit alpha	Pafah1b1	9	9	9	35.1	46.67	0	83.792	564270000	25					Intracellular	0.5432	Intracellular	0.9448	0	0.0551	4.77972	0	-4.40231	-3.81369	+		+	16230000	NA	2614540	NA	4	0	7	5	6	7	0	0	0	0	0	166270000	147590000	124950000	115790000	0	0
O35263	Platelet-activating factor acetylhydrolase IB subunit gamma	Pafah1b3	3	3	3	23.7	25.863	0	39.693	47842000	10					UPS	0.5533	Intracellular	0.8459	0.0001	0.154	1.45034	0.00233057	-1.61795	-1.15678	+		+	1752480	NA	789422	NA	3	0	2	1	3	4	0	0	0	0	0	2430400	3467900	23816000	18128000	0	0
Q05030	Platelet-derived growth factor receptor beta	Pdgfrb	15	15	15	22.1	122.83	0	68.362	502670000	48	+	+			Signal-peptide	0.9292	Signal-peptide	0.001	0.9292	0.0698	2.96793	9.52e-05	-3.90466	-2.66604	+		+	14267700	3156800	3159990	NA	4	1	13	11	12	10	0	0	1	0	1	167390000	152470000	78601000	100260000	0	1713600
Q6S3A0;P30427	Plectin	Plec	173	173	3	47.4	533.82	0	323.31	17300000000	794					Intracellular	0.8798	Intracellular	0.8568	0.0005	0.1427	1.67883	0.000192661	-4.80757	-2.04776	+		+	500290000	41528700	23602800	33938500	4	4	164	166	187	181	0	38	20	0	38	3891700000	4196300000	4944800000	3689400000	7278800	198130000
A0A0H2UHZ6;Q9WV25	Poly(U)-binding-splicing factor PUF60	Puf60	5	5	5	17.4	60.12	0	23.628	95298000	14					Intracellular	0.5212	Intracellular	0.975	0.0014	0.0235	2.53451	0.000422642	-2.03505	-1.66583	+		+	2829700	NA	309205	NA	4	0	2	4	5	3	0	0	0	0	0	19205000	24466000	22384000	29243000	0	0
G3V9N0;D3ZSR2	Polyadenylate-binding protein	Pabpc4	9	3	3	19.7	70.833	0	13.725	150180000	12					Intracellular	0.5682	Intracellular	0.9977	0.0004	0.0019	2.31228	0.000301399	-2.70578	-1.90097	+		+	4373920	NA	327276	NA	4	0	3	2	5	2	0	0	0	0	0	33077000	44621000	49435000	23044000	0	0
Q9EPH8;A0A0G2JZS2;B5DF80;D4A233;D3ZAS7	Polyadenylate-binding protein 1	Pabpc1	16	16	10	40.9	70.7	0	216.7	1860000000	89					Intracellular	0.5692	Intracellular	0.996	0.0002	0.0038	4.01094	0	-3.92265	-3.18921	+		+	51900200	4482700	10084400	1394680	4	3	21	23	24	13	0	2	2	0	4	406150000	441880000	594090000	389700000	0	8097400
D3ZB30;A0A0G2JTV1;Q6P736;Q00438	Polypyrimidine tract-binding protein 1	Ptbp1	18	18	17	52.1	56.935	0	254.54	3421800000	171					Intracellular	0.5013	Intracellular	0.9375	0.0003	0.0622	4.70692	0	-6.78995	-4.98323	+		+	98196700	NA	13195200	NA	4	0	44	42	39	46	0	0	0	0	0	675950000	774780000	1136500000	832170000	0	2380200
A0A0H2UHF6;Q9ES40	PRA1 family protein 3	Arl6ip5	5	5	5	17.4	23.639	0	8.8702	212750000	12		+			Transmembrane	0.9251	Transmembrane	0.0594	0.0155	0.9251	3.92381	9.88e-05	-3.1974	-2.74884	+		+	5915050	NA	3078500	NA	4	0	3	3	4	2	0	0	0	0	0	34644000	44588000	92321000	41201000	0	0
A2VD12	Pre-B-cell leukemia transcription factor-interacting protein 1	Pbxip1	11	11	11	31	80.275	0	98.73	370350000	46					Intracellular	0.572	Intracellular	0.9799	0.0001	0.02	2.73062	0.000150336	-3.25886	-2.30011	+		+	10429200	NA	5879540	NA	4	0	11	7	17	11	0	0	0	0	0	33480000	28807000	233860000	72294000	0	0
B0BN18	Prefoldin subunit 2	Pfdn2	2	2	2	16.9	16.58	0.00044444	4.3428	74528000	17					UPS	0.5294	Intracellular	0.9668	0	0.0332	1.07381	0.00858733	-1.42725	-0.957322	+		+	2288430	NA	675515	NA	3	0	3	5	5	4	0	0	0	0	0	15007000	14280000	27865000	17377000	0	0
G3V8L3;P48679;A0A0G2JTC5;Q6P6U3;A0A0G2K3R2;A0A1B0GWU9	Prelamin-A/C;Lamin-A/C	Lmna	52	52	51	69.2	74.311	0	323.31	35700000000	322					Intracellular	0.8798	Intracellular	0.9951	0	0.0048	2.54379	0.000205882	-3.11234	-2.15827	+		+	956342000	124559000	411263000	65334700	4	4	75	79	62	68	0	11	7	0	20	9910900000	9977500000	8371800000	6419100000	0	318730000
Q9JMJ4	Pre-mRNA-processing factor 19	Prpf19	10	10	10	42.3	55.238	0	62.52	330180000	52					UPS	0.5041	Intracellular	0.9264	0.0001	0.0735	6.02421	0	-4.10915	-4.09666	+		+	9739400	NA	2234860	NA	4	0	12	13	11	16	0	0	0	0	0	60920000	64904000	96664000	106900000	0	0
Q99ML5	Prenylcysteine oxidase	Pcyox1	13	13	13	44.2	56.287	0	159.55	1112600000	70	+			+	Signal-peptide	0.8431	Signal-peptide	0.0034	0.8431	0.1534	4.74691	0	-5.35016	-4.32762	+		+	32466200	NA	13078900	NA	4	0	19	24	12	15	0	0	0	0	0	290730000	431260000	212010000	177460000	0	1101700
G3V6S1;Q62627	PRKC apoptosis WT1 regulator protein	Pawr	6	6	6	43.4	35.853	0	164.34	242490000	27					Intracellular	0.9344	Intracellular	0.9454	0.0001	0.0545	2.90617	0.000164223	-3.37122	-2.42585	+		+	7203100	NA	2235340	NA	4	0	5	8	7	7	0	0	0	0	0	48854000	49599000	62482000	81559000	0	0
A0A0U1RRZ4;Q4KLP0	Probable 2-oxoglutarate dehydrogenase E1 component DHKTD1, mitochondrial	Dhtkd1	6	6	6	10.9	99.269	0	14.799	3840300000	16					Intracellular	0.5682	Intracellular	0.9053	0.0083	0.0864	5.94558	0	-7.32149	-6.24162	+		+	111403000	NA	33744500	NA	4	0	4	7	2	3	0	0	0	0	0	884010000	1057600000	1021300000	821660000	0	15619000
P00786;A0A0G2K8H6;A0A0H2UHL6	Pro-cathepsin H;Cathepsin H mini chain;Cathepsin H;Cathepsin H heavy chain;Cathepsin H light chain	Ctsh	6	6	6	34.5	37.104	0	39.608	208700000	16	+			+	Signal-peptide	0.9608	Signal-peptide	0.0025	0.9608	0.0367	0.478441	0.135119	-0.796092	-0.511936				5084500	6946150	980028	2427850	4	2	2	1	0	5	0	1	0	5	2	31238000	47688000	21493000	46082000	0	3801100
Q5U367	Procollagen-lysine,2-oxoglutarate 5-dioxygenase 3	Plod3	26	24	24	50.7	85.059	0	196.19	1563600000	135	+			+	Signal-peptide	0.9998	Signal-peptide	0.0001	0.9998	0.0002	0.168121	0.671083	-0.146819	-0.129039				33063300	29917700	12294100	11383900	4	4	14	17	38	21	0	11	8	20	6	174820000	239140000	606580000	173590000	0	56416000
D3ZDU5;Q9EPC6	Profilin;Profilin-2	Pfn2	4	4	4	41.2	16.027	0	13.384	315050000	21					UPS	0.5551	Intracellular	0.8628	0.001	0.1362	3.07575	0.000152589	-2.98225	-2.32235	+		+	8627850	NA	701244	NA	4	0	4	3	7	7	0	0	0	0	0	64376000	65142000	79081000	83127000	0	0
P62963;CON__P02584	Profilin-1	Pfn1	11	11	11	85.7	14.957	0	302.55	5611200000	192					UPS	0.6262	Intracellular	0.9015	0.0043	0.0942	0.604356	0.0590455	-1.04073	-0.644508				114774000	74848200	23005500	44276700	4	4	24	28	40	33	0	24	19	4	20	993350000	1125400000	1630800000	920900000	0	329710000
A0A140TAA4;Q9QZA2	Programmed cell death 6-interacting protein	Pdcd6ip	24	24	24	43.7	95.881	0	167.1	1393600000	122					Intracellular	0.5171	Intracellular	0.9589	0.0001	0.041	1.92046	0.00236268	-1.36855	-1.15485	+		+	33864500	14349900	3046290	6460820	4	4	24	22	28	29	0	8	5	2	4	275100000	317090000	363610000	302090000	0	57038000
P67779;D3ZFH6	Prohibitin	Phb	14	14	14	69.1	29.82	0	93.795	2335300000	61					Transmembrane	0.4759	Transmembrane	0.3247	0.1994	0.4759	5.97554	0	-6.93938	-6.03714	+		+	68950000	NA	12216100	NA	4	0	22	12	10	17	0	0	0	0	0	637080000	728030000	394460000	575750000	0	0
A0A0G2KB63;Q5XIH7	Prohibitin-2	Phb2	15	15	15	57.2	33.168	0	79.306	2088600000	83					Intracellular	0.9343	Intracellular	0.5471	0.1097	0.3432	4.67108	0	-6.77352	-4.94686	+		+	62089000	NA	14745100	NA	4	0	22	21	21	19	0	0	0	0	0	551270000	544280000	435700000	556470000	0	0
G3V6W2;Q9WTV0	Prolactin regulatory element-binding protein	Preb	2	2	2	10.8	45.371	0	5.1864	64606000	3		+			Intracellular	0.5424	Intracellular	0.9053	0.0387	0.056	1.21595	0.0135859	-1.16373	-0.891589	+		+	2036830	NA	432171	NA	3	0	2	0	1	0	0	0	0	0	0	14280000	11659000	27390000	11277000	0	0
P04961	Proliferating cell nuclear antigen	Pcna	4	4	4	33	28.748	0	13.754	73051000	9					UPS	0.5957	Intracellular	0.9409	0.0023	0.0568	1.91859	0.000574545	-2.24365	-1.56692	+		+	2229520	NA	661538	NA	4	0	1	2	1	5	0	0	0	0	0	8686400	7955800	11206000	45204000	0	0
Q6AYD3;A0A0G2JVS2	Proliferation-associated protein 2G4	Pa2g4	11	11	11	46.2	43.656	0	61.703	849470000	37					Intracellular	0.6105	Intracellular	0.9981	0	0.0019	4.0881	0	-4.88802	-3.70522	+		+	25138700	NA	1421780	NA	4	0	8	6	10	13	0	0	0	0	0	209650000	228820000	203040000	207950000	0	0
Q56B11;A0A0G2JSQ9	Proline-, glutamic acid- and leucine-rich protein 1	Pelp1	8	8	8	14.2	119.14	0	33.877	86052000	19					Intracellular	0.6987	Intracellular	0.5532	0.2932	0.1536	1.26965	0.00127605	-2.22916	-1.28762	+		+	2530830	NA	398517	NA	3	0	7	3	3	6	0	0	0	0	0	23272000	26833000	14938000	21009000	0	0
A0A0G2K199;Q9R1J8	Prolyl 3-hydroxylase 1	Lepre1	16	16	16	38	83.513	0	199.84	1152700000	81	+		+		Signal-peptide	0.7771	Signal-peptide	0.0982	0.7771	0.1247	3.2063	0	-4.75148	-3.10766	+		+	32647000	4878500	8904730	NA	4	1	18	20	22	20	0	0	0	0	1	235810000	250240000	449940000	207060000	0	0
P54001	Prolyl 4-hydroxylase subunit alpha-1	P4ha1	25	25	25	62	60.897	0	323.31	9466200000	176	+			+	Intracellular	0.5446	Intracellular	0.5162	0.375	0.1088	2.30536	8.78e-05	-4.87788	-2.53057	+		+	259892000	21503000	107225000	19644800	4	3	34	34	54	39	0	3	2	0	10	1547200000	1810000000	4221600000	1754300000	0	16966000
F1LQ79;Q6W3E9	Prolyl 4-hydroxylase subunit alpha-3	P4ha3	7	7	7	16.2	61.213	0	15.741	242550000	29	+			+	Signal-peptide	0.9177	Signal-peptide	0.0539	0.9177	0.0284	3.4476	0.00010687	-3.77328	-2.85352	+		+	7125050	NA	1149680	NA	4	0	7	6	10	6	0	0	0	0	0	51053000	58759000	74175000	58564000	0	0
A0A0G2K1M8;O70196	Prolyl endopeptidase	Prep	10	10	10	24.3	80.491	0	34.355	148600000	31					UPS	0.5212	Intracellular	0.9941	0	0.0059	2.04159	0.00111388	-1.74297	-1.38326	+		+	4212150	NA	1116610	NA	4	0	4	4	12	11	0	0	0	0	0	15939000	21854000	57752000	48512000	0	1248500
A0A0G2K401;A0A0G2K5P9;P14882	Propionyl-CoA carboxylase alpha chain, mitochondrial	Pcca	7	7	7	15.9	79.811	0	13.603	186540000	19					Intracellular	0.5676	Intracellular	0.9254	0.0074	0.0671	2.41494	0.000215385	-3.48376	-2.22776	+		+	5626650	NA	1765480	NA	4	0	7	5	3	4	0	0	0	0	0	70255000	55932000	14157000	46201000	0	0
P07633	Propionyl-CoA carboxylase beta chain, mitochondrial	Pccb	11	11	1	35.3	58.626	0	105.85	328640000	44					Intracellular	0.5691	Intracellular	0.9174	0.0079	0.0747	3.66848	0.000100719	-3.43061	-2.78244	+		+	9956780	NA	2898620	NA	4	0	14	12	7	11	0	0	0	0	0	95359000	88121000	27412000	117750000	0	0
P83868	Prostaglandin E synthase 3	Ptges3	3	3	3	20	18.721	0	5.4118	202090000	14					Intracellular	0.5959	Intracellular	0.9932	0	0.0067	1.24689	0.00108855	-2.47641	-1.33761	+		+	6311200	NA	664356	NA	3	0	3	6	3	2	0	0	0	0	0	64675000	66131000	53310000	17971000	0	0
F1M790;Q62786	Prostaglandin F2 receptor negative regulator	Ptgfrn	18	18	18	25.5	98.667	0	101.11	1204800000	114	+	+			Signal-peptide	0.8275	Signal-peptide	0.058	0.8275	0.1146	2.13232	0.0574838	0.621252	0.649494				23386000	35905800	3811280	5290800	4	4	13	18	20	13	0	12	12	19	7	196010000	219730000	191880000	141150000	0	92454000
P97584	Prostaglandin reductase 1	Ptgr1	8	8	8	39.8	35.718	0	35.264	416950000	37					UPS	0.6329	Intracellular	0.9608	0.0058	0.0334	0.130691	0.516568	-0.385953	-0.201977				9749650	12229300	5585580	3370660	4	3	4	10	0	6	0	7	6	0	4	126760000	103680000	6773100	63378000	0	58054000
Q9JMB5	Proteasomal ubiquitin receptor ADRM1	Adrm1	3	3	3	12.5	42.102	0	38.08	179800000	22					Intracellular	0.5928	Intracellular	0.9353	0.0008	0.0639	3.63705	0.000202899	-2.34201	-2.13016	+		+	5204070	NA	1004590	NA	4	0	5	4	6	4	0	2	0	0	1	37528000	48597000	61959000	30680000	0	1033800
Q6P9V7;Q63797;A0A0G2JVP9	Proteasome activator complex subunit 1	Psme1	7	7	7	42.6	28.635	0	23.377	320730000	27					UPS	0.6152	Intracellular	0.9898	0	0.0102	1.11167	0.00203498	-2.13487	-1.18419	+		+	8351020	5563300	592745	668073	4	2	4	5	8	10	0	0	0	0	0	78204000	49316000	83022000	77549000	0	11758000
Q63798	Proteasome activator complex subunit 2	Psme2	5	5	5	32.8	26.857	0	26.234	228590000	26					UPS	0.5991	Intracellular	0.9489	0	0.0511	1.69872	0.000360531	-2.89331	-1.68139	+		+	6000380	2640700	1603220	NA	4	1	6	5	4	5	0	2	2	0	2	77616000	64110000	32533000	39336000	0	4905900
Q6P9V6;P34064	Proteasome subunit alpha type;Proteasome subunit alpha type-5	Psma5	7	7	7	52.3	26.411	0	60.78	990640000	31					UPS	0.5962	Intracellular	0.8963	0.0001	0.1036	1.14372	0.00115527	-2.64215	-1.31406	+		+	23941500	15670000	2629110	2378710	4	2	5	5	7	7	0	1	3	0	3	237080000	271970000	236710000	185220000	0	0
P18420	Proteasome subunit alpha type-1	Psma1	9	9	9	47.5	29.517	0	67.094	618420000	40					Intracellular	0.5958	Intracellular	0.8936	0.0004	0.1061	1.53967	0.000821333	-2.62963	-1.52889	+		+	15248500	6788150	1123630	1382610	4	2	8	8	10	9	0	2	0	0	3	112070000	155210000	201150000	132000000	0	6783100
P17220	Proteasome subunit alpha type-2	Psma2	8	8	8	40.2	25.926	0	61.341	814320000	53					UPS	0.5522	Intracellular	0.7687	0.0203	0.211	0.649206	0.0158579	-1.8775	-0.858931	+		+	19552500	13896700	2374670	2252460	4	3	10	9	9	11	0	4	5	0	5	134270000	163510000	215570000	193520000	0	26911000
P18422	Proteasome subunit alpha type-3	Psma3	8	8	8	39.2	28.419	0	105.32	703690000	33					UPS	0.5494	Intracellular	0.8895	0.0002	0.1103	1.05508	0.00266965	-2.03583	-1.13067	+		+	18274000	8929030	2878670	2403890	4	3	5	5	8	4	0	2	2	0	7	141740000	196610000	163840000	125760000	0	18466000
P21670	Proteasome subunit alpha type-4	Psma4	10	10	10	54	29.497	0	40.993	712450000	53					Intracellular	0.5799	Intracellular	0.9605	0.0002	0.0393	0.807065	0.0110014	-1.71132	-0.922508	+		+	16826000	10837500	2098400	3499670	4	3	6	12	9	12	0	2	4	0	8	162260000	173520000	186350000	118140000	0	21670000
P60901;A0A0G2K0D7	Proteasome subunit alpha type-6	Psma6	6	6	6	32.1	27.399	0	20.637	734890000	41					UPS	0.6149	Intracellular	0.7781	0.0005	0.2214	1.14644	0.00388613	-1.71039	-1.08109	+		+	19393000	10139000	2646640	1938420	4	3	6	6	8	4	0	4	6	0	7	149740000	204570000	170970000	113400000	0	24959000
A0A0G2K0W9;P48004;F1M6I7	Proteasome subunit alpha type-7;Proteasome subunit alpha type	Psma7;Psma8	10	10	10	50.8	27.855	0	52.438	1348400000	75					Intracellular	0.7919	Intracellular	0.9904	0.0001	0.0094	0.590673	0.0211681	-1.83379	-0.810375	+		+	31421300	24421000	2107670	4177080	4	3	11	17	12	12	0	4	11	0	8	301210000	297140000	296400000	276110000	0	62965000
Q6PDW4;P18421	Proteasome subunit beta type;Proteasome subunit beta type-1	Psmb1	8	8	8	47.1	26.407	0	25.355	641710000	45					UPS	0.5501	Intracellular	0.9389	0.0007	0.0604	2.39417	0.0016278	-1.34239	-1.22341	+		+	15531700	7381000	1441400	2278770	4	3	11	9	10	9	0	1	2	0	3	167160000	168830000	139070000	122070000	0	5715500
G3V8U9;P34067	Proteasome subunit beta type;Proteasome subunit beta type-4	Psmb4	5	5	5	32.3	25.76	0	36.936	285890000	22					Intracellular	0.8623	Intracellular	0.8534	0.0014	0.1452	6.07995	0	-3.29182	-3.43193	+		+	8143270	NA	651391	NA	4	0	7	8	2	2	0	1	0	0	2	71181000	82355000	71888000	54453000	0	0
G3V7Q6;P28075	Proteasome subunit beta type;Proteasome subunit beta type-5	Psmb5	7	7	7	38.8	28.559	0	48.647	680500000	44					UPS	0.5453	Intracellular	0.9505	0.0013	0.0482	1.30345	0.00169005	-1.93846	-1.21848	+		+	15613800	7114500	2826550	2860380	4	3	8	7	13	11	0	2	1	0	2	143640000	169220000	195160000	129130000	12943000	8693000
P40307	Proteasome subunit beta type-2	Psmb2	7	7	7	59.7	22.912	0	81.36	540600000	49					UPS	0.5495	Intracellular	0.891	0.0099	0.0991	1.02203	0.00218788	-2.25446	-1.16284	+		+	12793000	5895430	1604930	1065570	4	3	7	10	12	12	0	3	2	0	3	91076000	111650000	184130000	112370000	0	11386000
P40112;D3Z8J0	Proteasome subunit beta type-3	Psmb3;RGD1564425	6	6	6	37.1	22.965	0	34.636	331850000	19					UPS	0.5487	Intracellular	0.7675	0.0631	0.1695	0.529676	0.0796435	-1.0082	-0.600275				7152630	6500970	1486860	1982520	4	3	5	1	5	4	0	1	1	0	2	54486000	64453000	113440000	57285000	0	10878000
A0A0G2JSL0;P28073	Proteasome subunit beta type-6	Psmb6	5	5	5	31.9	25.303	0	27.465	701420000	20					UPS	0.5255	Intracellular	0.8625	0.0383	0.0992	0.953317	0.00365472	-2.0755	-1.08524	+		+	16319500	13075500	632098	68586.5	4	2	2	5	4	5	0	1	0	0	3	156500000	179640000	166580000	143710000	0	23646000
Q9JHW0;A0A0G2JUN8	Proteasome subunit beta type-7	Psmb7	6	6	6	46.2	29.927	0	55.343	268850000	16					UPS	0.5574	Intracellular	0.9633	0.0037	0.033	3.83073	0.000107486	-3.44966	-2.85781	+		+	7764030	NA	1397730	NA	4	0	4	3	3	6	0	0	0	0	0	65871000	58831000	63438000	73500000	0	4387400
Q63009;A0A0G2K9I8	Protein arginine N-methyltransferase 1	Prmt1	11	11	11	51	40.522	0	29.421	437100000	38					UPS	0.5545	Intracellular	0.9174	0.0001	0.0825	1.95927	0.000364334	-2.56194	-1.70112	+		+	12011000	6810700	2788660	NA	4	1	8	9	10	9	0	0	0	0	2	112330000	68180000	103410000	131230000	0	4519300
Q9QZ81;F1LRP7;F1LUS2	Protein argonaute-2	Ago2	4	4	4	8	97.317	0	12.267	54053000	20					Intracellular	0.5697	Intracellular	0.9485	0.0001	0.0515	0.11582	0.70163	-0.148186	-0.116168				1691300	NA	229571	NA	3	0	4	6	5	5	0	0	0	0	0	10906000	13886000	13440000	15821000	0	0
Q5XIM5;A0A0G2K0B0;Q6QI67	Protein CDV3 homolog	Cdv3;LOC499235	3	3	3	36	24.31	0	31.253	176520000	16					UPS	0.5341	Intracellular	0.9505	0.0001	0.0495	2.26468	0.000248889	-2.93091	-1.96552	+		+	5148580	NA	1219940	NA	4	0	6	4	4	2	0	0	0	0	0	35736000	35388000	65512000	39885000	0	0
O88767;Q5BKC3	Protein deglycase DJ-1	Park7	9	9	9	68.3	19.974	0	80.049	1375600000	64					UPS	0.5918	Intracellular	0.9195	0.0008	0.0798	1.23422	0.00292639	-1.7321	-1.12321	+		+	35086500	13557000	8500470	8515370	4	4	13	9	11	11	0	6	7	1	6	274090000	316240000	373100000	255480000	0	56420000
P04785	Protein disulfide-isomerase	P4hb	35	35	35	72.1	56.951	0	323.31	23200000000	403	+		+		Signal-peptide	0.9601	Signal-peptide	0.0016	0.9601	0.0383	2.74247	0.000195122	-2.69904	-2.06329	+		+	603553000	103946000	142711000	47903000	4	4	68	63	113	86	0	20	18	11	24	4533100000	5591400000	7980200000	4138800000	0	309210000
A0A0H2UHM5;P11598	Protein disulfide-isomerase A3	Pdia3	38	38	38	70	57.078	0	323.31	25800000000	366	+			+	Signal-peptide	0.9403	Signal-peptide	0.0115	0.9403	0.0482	2.65908	0.00021079	-3.07408	-2.19392	+		+	682383000	96662200	122986000	51415300	4	4	66	81	85	76	0	22	17	2	17	5214400000	6398100000	8516900000	4714200000	0	307000000
P38659	Protein disulfide-isomerase A4	Pdia4	29	1	1	49.1	72.719	0	11.502	86838000	8	+			+	Signal-peptide	0.9979	Signal-peptide	0	0.9979	0.0021	1.26797	0.00479202	-1.4653	-1.03712	+		+	1981190	NA	1056010	NA	4	0	2	3	1	2	0	0	0	0	0	28016000	31178000	16687000	10000000	0	956860
G3V6T7	Protein disulfide-isomerase A4	Pdia4	30	30	2	49.1	72.747	0	195.57	4914600000	109	+			+	Signal-peptide	0.9979	Signal-peptide	0	0.9979	0.0021	2.7424	0.000110236	-5.10838	-2.89962	+		+	139089000	7829560	57602100	5305270	4	3	29	26	27	22	0	1	1	1	2	984990000	1338100000	1740000000	721150000	0	51109000
Q5I0H9	Protein disulfide-isomerase A5	Pdia5	12	12	12	43.9	59.399	0	53.562	432200000	48	+			+	Signal-peptide	0.7241	Signal-peptide	0.089	0.7241	0.1869	5.5154	0	-4.65835	-4.31058	+		+	12472400	NA	2739230	NA	4	0	10	12	15	11	0	0	0	0	0	88235000	112740000	175410000	55821000	0	0
A0A0G2JSZ5;Q63081	Protein disulfide-isomerase A6	Pdia6	20	20	20	56.4	48.76	0	168.86	9543800000	246	+		+		Signal-peptide	0.6185	Signal-peptide	0.0811	0.6185	0.3004	1.71315	0.000374753	-3.16316	-1.75893	+		+	267607000	45729200	44611400	31264800	4	4	47	47	49	54	0	16	15	1	17	2314100000	2556600000	2069300000	1965600000	0	218540000
Q62902;F1LRA1;A0A0G2JXC1	Protein ERGIC-53	Lman1	10	10	10	27.9	57.956	0	138.73	2161700000	89	+	+			Signal-peptide	0.7778	Signal-peptide	0.1338	0.7778	0.0884	3.81341	0	-5.57905	-3.81316	+		+	60920500	4177100	6890720	NA	4	1	25	18	22	20	0	1	3	0	0	520630000	613150000	625310000	377970000	0	10424000
B0BN94	Protein FAM136A	Fam136a	3	3	3	25.4	15.625	0	11.512	142460000	6					UPS	0.5279	Intracellular	0.8508	0.0026	0.1467	2.63917	0.000340426	-2.2573	-1.81236	+		+	4234470	NA	901738	NA	4	0	1	2	0	3	0	0	0	0	0	40025000	42927000	26852000	32653000	0	0
Q5FWT1	Protein FAM98A	Fam98a	6	6	6	18.6	55.07	0	12.995	157520000	16					Intracellular	0.6831	Intracellular	0.9173	0.0033	0.0794	2.27558	0.00145683	-1.4244	-1.25597	+		+	4593800	NA	682127	NA	4	0	3	3	5	5	0	0	0	0	0	39543000	36999000	54172000	26803000	0	0
Q9Z1H9	Protein kinase C delta-binding protein	Prkcdbp	5	5	5	27.8	27.91	0	20.598	687390000	15					Intracellular	0.9326	Intracellular	0.7008	0.0083	0.2909	1.65081	0.000299465	-3.99881	-1.89643	+		+	20963700	NA	6566280	NA	3	0	6	6	3	0	0	0	0	0	0	219330000	264230000	143500000	30660000	0	7070000
F1M2P8;F1LS98;P05696	Protein kinase C;Protein kinase C alpha type	Prkca	3	3	3	9.1	72.77	0	26.462	55333000	15					Intracellular	0.5403	Intracellular	0.8812	0.0002	0.1186	2.30959	0.00128217	-1.49684	-1.30694	+		+	1630400	NA	143003	NA	4	0	3	3	7	2	0	0	0	0	0	15483000	10029000	16617000	13204000	0	0
Q9Z1W6	Protein LYRIC	Mtdh	4	4	4	11.2	63.968	0	102.65	130040000	14		+			Transmembrane	0.997	Transmembrane	0	0.003	0.997	3.47106	0.000206388	-2.45675	-2.16123	+		+	3796180	NA	851410	NA	4	0	2	5	5	2	0	0	0	0	0	25614000	41394000	40340000	22688000	0	0
Q9ESN0	Protein Niban	Fam129a	30	30	30	43.1	103.46	0	323.31	3490000000	162					Intracellular	0.6786	Intracellular	0.9267	0	0.0732	2.1587	0.000339394	-2.6212	-1.80569	+		+	89502500	18148700	2445300	10006000	4	4	40	32	36	28	0	9	6	2	9	843280000	871890000	947940000	683460000	0	51917000
A0A140TAF7;G3V9D0	Protein O-glucosyltransferase 1	Poglut1	4	4	4	18.7	52.815	0	20.929	194880000	13	+			+	Intracellular	0.9325	Intracellular	0.9439	0.0002	0.056	3.49098	8.79e-05	-3.09661	-2.53635	+		+	5610600	NA	676651	NA	4	0	3	2	5	3	0	0	0	0	0	35132000	42792000	75398000	39825000	0	1228700
Q5HZV9;R9PXV7	Protein phosphatase 1 regulatory subunit 7	Ppp1r7	5	5	5	25.8	41.296	0	16.097	118180000	15					Intracellular	0.5794	Intracellular	0.9481	0	0.0519	2.14444	0.000872727	-1.87729	-1.4781	+		+	3518950	NA	1032790	NA	4	0	3	4	3	5	0	0	0	0	0	27319000	19933000	29915000	41013000	0	0
D4A1S6;A0A0G2JWJ0;Q10728;D4ACS0;D3ZR53;D3ZIC4	Protein phosphatase 1 regulatory subunit;Protein phosphatase 1 regulatory subunit 12A	Ppp1r12a	10	10	10	16.6	109.7	0	39.647	547950000	39					Intracellular	0.8643	Intracellular	0.9851	0.0001	0.0148	2.54052	0.000163504	-3.88126	-2.42291	+		+	15122800	2579500	3448350	842445	4	2	8	10	9	10	0	1	0	0	1	141480000	138370000	130230000	128770000	0	3740600
Q9WVR7	Protein phosphatase 1F	Ppm1f	3	3	3	16.2	49.165	0	24.2	82677000	16					Intracellular	0.5596	Intracellular	0.9373	0.0019	0.0608	2.65687	0.000293809	-2.36041	-1.87025	+		+	2318880	NA	450964	NA	4	0	4	5	5	2	0	0	0	0	0	16544000	22096000	19799000	20054000	0	4182900
G3V834;Q3T1I4	Protein PRRC1	Prrc1	6	6	6	32.1	46.278	0	58.859	395370000	27					Intracellular	0.5168	Intracellular	0.9214	0.0003	0.0783	3.40564	0.000212389	-2.56676	-2.20955	+		+	10768900	2239030	2191650	263061	4	3	6	6	8	3	0	0	2	0	2	94660000	104630000	93144000	89269000	0	4521300
A0A0G2JUS0;D4A2X0;F1LMH5;A0A0G2JXZ5;Q91XU1	Protein quaking	LOC100910212;Qki	5	5	5	24.5	35.818	0	8.6839	88780000	17					UPS	0.5359	Intracellular	0.9623	0	0.0376	3.0215	0.00145227	-1.26722	-1.25385	+		+	2626530	NA	417273	NA	4	0	2	4	8	3	0	0	0	0	0	23716000	11810000	26786000	26468000	0	0
Q498C8	Protein RER1	Rer1	3	3	3	24.5	22.988	0	20.265	394730000	16		+			Transmembrane	0.9638	Transmembrane	0.0033	0.0329	0.9638	4.55782	0	-4.08595	-3.52466	+		+	11543100	NA	2030770	NA	4	0	4	3	5	4	0	0	0	0	0	103640000	96020000	126600000	68461000	0	0
F1LYQ0;Q6B345	Protein S100;Protein S100-A11	RGD1563581;S100a11	4	4	4	60.2	11.814	0	127.64	1048300000	51					UPS	0.6176	Intracellular	0.8761	0.0002	0.1237	1.48848	0.00145569	-1.83645	-1.25504	+		+	25799500	11453400	2479150	2553470	4	3	13	14	11	7	0	2	1	0	3	256120000	240180000	289980000	169380000	0	37123000
P05943	Protein S100-A10	S100a10	2	2	2	35.8	11.075	0	6.1598	852800000	15					UPS	0.6138	Intracellular	0.9349	0.0001	0.065	3.08689	0	-4.57668	-2.97303	+		+	24016200	NA	2600100	NA	4	0	4	2	5	3	0	1	0	0	0	193010000	240330000	217970000	165220000	0	16040000
P05942	Protein S100-A4	S100a4	2	2	2	24.8	11.776	0	7.6451	2390700000	20					UPS	0.5505	Intracellular	0.9304	0	0.0695	0.843351	0.00964365	-1.7111	-0.941765	+		+	62460000	36230000	25617800	15104800	4	3	3	3	3	4	0	4	1	1	1	641110000	795510000	322120000	283880000	0	122720000
P05964	Protein S100-A6	S100a6	5	5	5	66.3	10.035	0	33.149	669210000	27					UPS	0.614	Intracellular	0.8151	0.1277	0.0572	1.83799	0.000289855	-3.26678	-1.85484	+		+	17928300	6408300	9399130	NA	4	1	7	9	7	3	0	1	0	0	0	161120000	191540000	254750000	54834000	0	6966800
Q5XFW8	Protein SEC13 homolog	Sec13	7	7	7	43.2	35.547	0	97.456	875980000	49					UPS	0.5227	Intracellular	0.9214	0	0.0786	4.72816	0	-5.55931	-4.42364	+		+	24101500	NA	1506560	NA	4	0	12	8	13	13	0	1	1	0	1	178340000	209990000	274590000	199340000	0	2242100
A0A0G2JSU3;D3ZC07;Q63945;A0A0G2K5L9	Protein SET	Pkn3;Set	3	3	3	15.9	33.381	0	20.033	453030000	19					UPS	0.5025	Intracellular	0.984	0	0.016	3.85985	0	-4.10165	-3.20873	+		+	12828000	NA	1977810	NA	4	0	4	4	6	5	0	0	0	0	0	90347000	100060000	147620000	104490000	0	3419200
Q9Z2Q1;G3V699;A0A0G2K0X9	Protein transport protein Sec31A	Sec31a	38	38	38	51.5	135.27	0	323.31	4643800000	202					Intracellular	0.517	Intracellular	0.9852	0.0001	0.0147	3.46801	0	-6.42741	-3.82105	+		+	134663000	2888270	14514600	593384	4	3	47	48	48	57	0	0	2	0	0	1120000000	1000700000	1449100000	1022100000	0	16257000
P61621;A0A0U1RRQ7;D3ZEH3	Protein transport protein Sec61 subunit alpha isoform 1	Sec61a1;Sec61a2	8	8	8	25	52.264	0	189.48	1259500000	50		+			Transmembrane	0.9812	Transmembrane	0.0037	0.015	0.9812	7.42141	0	-4.83816	-5.15101	+		+	34361000	NA	3006990	NA	4	0	16	13	14	7	0	0	0	0	0	278530000	286750000	402500000	291690000	0	0
Q80W92	Protein VAC14 homolog	Vac14	4	4	4	6.5	88.067	0	9.9436	33584000	11					Intracellular	0.5048	Intracellular	0.9973	0	0.0026	0.367264	0.318452	0.424562	0.32633				985945	NA	238863	NA	4	0	2	4	3	2	0	0	0	0	0	2715700	11636000	9720500	9512200	0	0
Q6PEC3;G3V9N6;A0A0H2UHX7	Protein YIF1B	Yif1b	5	5	5	46.7	28.418	0	34.45	180270000	22		+			UPS	0.561	Intracellular	0.7657	0.0021	0.2321	3.35045	0.000217054	-2.65626	-2.24508	+		+	5274900	NA	905118	NA	4	0	4	7	6	5	0	0	0	0	0	44547000	59861000	50072000	25788000	0	0
Q5XID0;Q7TPI8	Protein YIPF5	Yipf5	3	3	3	22.2	27.903	0	67.477	170400000	15		+			UPS	0.5981	Intracellular	0.9043	0.0001	0.0956	3.83288	0.00020241	-2.26926	-2.12565	+		+	5018600	NA	1137380	NA	4	0	4	5	3	3	0	0	0	0	0	35008000	55387000	42797000	37205000	0	0
A0A140TAB9;P22062	Protein-L-isoaspartate(D-aspartate) O-methyltransferase	Pcmt1	2	2	2	21.9	21.192	0	16.445	61264000	11					UPS	0.5957	Intracellular	0.724	0.0093	0.2667	2.43837	0.00569929	-1.04342	-1.01676	+		+	1720100	NA	110659	NA	4	0	2	1	3	2	0	1	1	0	1	13541000	13545000	17457000	13939000	0	2780700
D3ZBP4	Protein-methionine sulfoxide oxidase MICAL1	Mical1	5	5	5	10.1	116.67	0	11.296	48816000	13					Intracellular	0.5489	Intracellular	0.9532	0.0002	0.0466	0.199896	0.434979	-0.385999	-0.246912				1833370	NA	419677	NA	3	0	2	1	10	0	0	0	0	0	0	8502100	13548000	26766000	0	0	0
P85973	Purine nucleoside phosphorylase	Pnp	17	17	17	78.5	32.302	0	79.081	1453400000	118					UPS	0.5498	Intracellular	0.8449	0.0019	0.1531	0.405732	0.0821018	-1.35304	-0.596019				28663800	31318300	1908270	5972660	4	3	20	18	26	24	0	10	9	1	10	302760000	266370000	419390000	274760000	0	67795000
A0A0H2UHU1;P61515;D4AAZ6	Putative 60S ribosomal protein L37a;60S ribosomal protein L37a	Rpl37a-ps1;Rpl37a	2	2	2	32.6	10.276	0	9.6279	304710000	10					Intracellular	0.9345	Intracellular	0.9292	0.0001	0.0706	3.01717	8.5e-05	-3.36309	-2.47259	+		+	8834680	NA	3184540	NA	4	0	3	2	2	3	0	0	0	0	0	82254000	93104000	103900000	25450000	0	0
Q4QQW8	Putative phospholipase B-like 2	Plbd2	7	7	7	18.6	65.455	0	30.114	187030000	33	+			+	Transmembrane	0.7713	Transmembrane	0.0142	0.2146	0.7713	5.31234	0	-2.92332	-2.95071	+		+	5562450	NA	1492860	NA	4	0	8	7	8	10	0	0	0	0	0	34196000	62849000	29225000	59768000	0	0
Q68FT3	Pyridine nucleotide-disulfide oxidoreductase domain-containing protein 2	Pyroxd2	4	4	4	15.5	62.878	0	35.549	51647000	13					Intracellular	0.6437	Intracellular	0.805	0.0039	0.1911	0.277977	0.29704	-0.562804	-0.343405				2108370	NA	198096	NA	3	0	5	3	0	5	0	0	0	0	0	16536000	14892000	0	20219000	0	0
Q6AY23	Pyrroline-5-carboxylate reductase 2	Pycr2	9	9	6	37.8	33.673	0	40.061	461610000	42					Transmembrane	0.5476	Transmembrane	0.2946	0.1578	0.5476	6.67099	0	-4.09714	-4.27874	+		+	13571800	NA	1870920	NA	4	0	11	11	9	11	0	0	0	0	0	101980000	151820000	118320000	89486000	0	0
A0A0G2JTL5;P52873	Pyruvate carboxylase, mitochondrial	Pc	14	14	14	18.8	140	0	140.68	390040000	46					Intracellular	0.5684	Intracellular	0.9508	0.003	0.0461	3.22507	9.48e-05	-3.56645	-2.65607	+		+	11824700	NA	4300830	NA	4	0	11	17	3	15	0	0	0	0	0	105490000	132580000	19222000	132760000	0	0
D4A5G8;P26284;F7FKI5;A0A0G2JW90	Pyruvate dehydrogenase E1 component subunit alpha;Pyruvate dehydrogenase E1 component subunit alpha, somatic form, mitochondrial	Pdha1l1;Pdha1	12	12	12	42.8	43.274	0	65.635	1792100000	58					Intracellular	0.676	Intracellular	0.883	0.0027	0.1143	5.48766	0	-5.69736	-4.96707	+		+	44607300	NA	14319400	NA	4	0	14	15	12	17	0	0	0	0	0	375480000	595960000	197540000	429600000	0	38398000
A0A0G2KAM3;P49432	Pyruvate dehydrogenase E1 component subunit beta, mitochondrial	Pdhb	10	10	10	42.6	46.192	0	68.412	1130800000	57					Intracellular	0.5653	Intracellular	0.9016	0.0002	0.0982	3.82063	0	-4.66903	-3.45012	+		+	32675500	NA	7898590	NA	4	0	13	22	10	12	0	0	0	0	0	365090000	329180000	182970000	253540000	0	0
A0A0G2JVG3;M0RD14	Pyruvate kinase	Pkm	37	37	5	75.1	53.193	0	323.31	24900000000	403					Intracellular	0.5656	Intracellular	0.9078	0	0.0922	1.49945	0.00181178	-1.70322	-1.20717	+		+	618688000	219640000	196363000	110896000	4	4	65	64	97	73	0	31	26	11	36	4467200000	4676400000	8935700000	4421100000	0	703290000
P11980;A0A0H2UI07;P12928	Pyruvate kinase PKM	Pkm	37	5	5	68	57.817	0	199.76	2334800000	64					Intracellular	0.5678	Intracellular	0.9078	0	0.0922	1.0593	0.0012832	-2.90632	-1.30711	+		+	56492700	20037000	16106700	6802010	4	3	11	8	17	17	0	4	3	1	3	411000000	442930000	896960000	401200000	0	64419000
P50398	Rab GDP dissociation inhibitor alpha	Gdi1	24	17	17	64.9	50.536	0	145.73	1411500000	97					Intracellular	0.5735	Intracellular	0.8988	0.004	0.0973	0.579004	0.028842	-1.56979	-0.757265	+		+	30075300	24026700	6871580	3528290	4	3	18	15	25	17	0	7	12	0	3	243880000	289580000	536890000	209060000	0	40189000
P50399	Rab GDP dissociation inhibitor beta	Gdi2	32	32	25	77.1	50.537	0	323.31	8501400000	272					Intracellular	0.5617	Intracellular	0.9356	0.0232	0.0412	0.69903	0.0621466	-0.91303	-0.636652				200598000	129391000	33027300	69389200	4	4	45	42	51	52	0	24	21	8	29	1590000000	1442300000	2190000000	1750000000	0	433960000
P69735;F1LP59;A0A0G2JXA1	Rab3 GTPase-activating protein catalytic subunit	Rab3gap1	3	3	3	7.2	86.586	0	4.9391	90413000	5					Intracellular	0.562	Intracellular	0.9348	0.0002	0.0649	1.32928	0.00428654	-1.49052	-1.06662	+		+	3245530	NA	760344	NA	3	0	1	1	3	0	0	0	0	0	0	18371000	29310000	37782000	4949300	0	0
Q5U1Z0;F1LMT8;D4ABP4	Rab3 GTPase-activating protein non-catalytic subunit	Rab3gap2	7	7	7	9.3	154.43	0	16.069	97182000	14	+			+	UPS	0.5211	Intracellular	0.9837	0.0003	0.016	2.66635	0.00109836	-1.47384	-1.35554	+		+	2836550	NA	692067	NA	4	0	1	1	8	4	0	0	0	0	0	19461000	21135000	34899000	21688000	0	0
Q6P791	Ragulator complex protein LAMTOR1	Lamtor1	4	4	4	35.4	17.721	0	22.386	144490000	19					UPS	0.5745	Intracellular	0.9238	0.0003	0.076	3.2863	0.00019422	-2.36941	-2.05813	+		+	4340730	NA	563824	NA	4	0	6	3	4	6	0	0	0	0	0	39253000	21794000	28515000	54934000	0	0
Q6RUV5;A0A0G2K0X4;M0R5T4;Q5U1Y2	Ras-related C3 botulinum toxin substrate 1	Rac1;Rac3	8	7	7	49.5	21.45	0	23.7	790050000	24					UPS	0.5583	Intracellular	0.8391	0.0051	0.1558	4.81821	0	-4.64847	-3.97818	+		+	23007700	NA	3171800	NA	4	0	4	5	5	10	0	0	0	0	0	142930000	137480000	314590000	195050000	0	0
Q63486;Q63487	Ras-related GTP-binding protein A;Ras-related GTP-binding protein B	Rraga;RragB	3	3	3	15	36.566	0	6.7879	65052000	10					Intracellular	0.8614	Intracellular	0.9039	0.0087	0.0874	2.51966	0.000874241	-1.71269	-1.47986	+		+	1925550	NA	419850	NA	4	0	2	4	3	1	0	0	0	0	0	19508000	16794000	15007000	13743000	0	0
Q5RKJ9;P35281	Ras-related protein Rab-10	Rab10	8	7	7	43.5	22.541	0	22.91	543550000	25					Intracellular	0.5497	Intracellular	0.7762	0.1861	0.0377	4.98811	0	-4.34519	-3.87251	+		+	15913800	NA	2634650	NA	4	0	6	4	7	5	0	1	1	0	1	148540000	129120000	151540000	111450000	0	690360
O35509;A0A0G2JZR4;B5DEP2	Ras-related protein Rab-11B	Rab11b	12	12	3	57.8	24.488	0	53.991	2321800000	43					UPS	0.5351	Intracellular	0.9824	0.0005	0.0171	1.01846	0.00177744	-2.51171	-1.21192	+		+	56599500	24170000	2719870	4853830	4	3	13	8	10	7	0	2	0	0	3	542320000	584480000	634060000	438960000	0	47123000
P61107;B0BMW0;A0A1B0GWR3	Ras-related protein Rab-14	Rab14	8	8	8	59.5	23.927	0	34.196	483320000	28					Intracellular	0.5294	Intracellular	0.8681	0.0102	0.1217	2.94611	0	-4.77679	-2.94698	+		+	14255000	NA	2029270	NA	4	0	9	7	6	6	0	0	0	0	0	125420000	147760000	94486000	112440000	0	0
Q5EB77	Ras-related protein Rab-18	Rab18	8	8	8	48.1	22.976	0	20.032	447320000	33					UPS	0.573	Intracellular	0.9344	0.0377	0.0279	3.94286	0	-3.63144	-3.00298	+		+	13200800	NA	1754760	NA	4	0	7	10	9	7	0	0	0	0	0	117790000	131060000	107850000	90621000	0	0
Q6NYB7;A0A0G2K235;E9PU16	Ras-related protein Rab-1A	Rab1A;Rab1	10	10	6	59	22.677	0	50.358	3300000000	72					Intracellular	0.553	Intracellular	0.8784	0.0309	0.0907	2.58654	9.49e-05	-4.59936	-2.65842	+		+	93623800	7397600	8155030	1628480	4	3	17	22	15	13	0	2	1	0	2	848450000	757090000	947100000	694670000	0	19855000
G3V6H0;P10536;P35289	Ras-related protein Rab-1B	LOC100363782;Rab1b	8	4	4	53.7	22.177	0	10.37	212630000	12					Intracellular	0.5507	Intracellular	0.8653	0.0364	0.0983	2.73212	0.000304017	-2.395	-1.91139	+		+	6269950	NA	781960	NA	4	0	6	2	3	1	0	0	0	0	0	65288000	54589000	53825000	38930000	0	0
Q6AXT5	Ras-related protein Rab-21	Rab21	5	5	5	24.2	24.163	0	15.929	96374000	13					Intracellular	0.6282	Intracellular	0.7288	0.0096	0.2616	1.97198	0.000366442	-2.59504	-1.71816	+		+	2802300	NA	706825	NA	4	0	2	3	3	5	0	0	0	0	0	12657000	30957000	33554000	19205000	0	0
A0A0G2JSZ1;Q6GQP4	Ras-related protein Rab-31	Rab31	2	2	1	12.8	21.499	0	6.2043	73298000	14					UPS	0.6033	Intracellular	0.9443	0.0045	0.0512	1.66852	0.00324118	-1.37265	-1.10292	+		+	2194200	NA	1353710	NA	4	0	8	2	2	2	0	0	0	0	0	16345000	10654000	17096000	29203000	0	0
Q5U1Y1;A0A0G2K738;R9PXX3	Ras-related protein Rab-34	Rab34	3	3	3	13.5	29.102	0	10.18	65196000	8					UPS	0.5522	Intracellular	0.8621	0.0014	0.1365	1.03681	0.00930748	-1.44257	-0.94923	+		+	2154370	NA	450093	NA	3	0	3	5	0	0	0	0	0	0	0	23484000	22646000	11646000	7420300	0	0
P51146;P05714	Ras-related protein Rab-4B	Rab4b	5	5	5	37.6	23.629	0	9.6651	157130000	24					UPS	0.5331	Intracellular	0.5443	0.1876	0.268	4.57997	0.000246696	-1.86911	-1.94115	+		+	4648200	NA	741929	NA	4	0	6	5	7	6	0	0	0	0	0	39918000	35272000	41064000	40876000	0	0
M0RC99	Ras-related protein Rab-5A	Rab5a	5	2	2	34.9	23.624	0	24.222	73349000	15					Intracellular	0.6147	Intracellular	0.9124	0.0539	0.0337	2.21489	0.000841008	-1.85586	-1.48639	+		+	2136300	NA	570912	NA	4	0	4	2	5	4	0	0	0	0	0	15175000	11869000	29152000	17153000	0	0
Q9WVB1	Ras-related protein Rab-6A	Rab6a	9	9	1	45.7	23.59	0	125.29	1830000000	50					Intracellular	0.5957	Intracellular	0.8242	0.0001	0.1757	3.37108	0	-5.20293	-3.36992	+		+	48027300	NA	6396980	NA	4	0	7	13	17	13	0	0	0	0	0	413630000	512490000	585780000	313090000	0	0
P09527;A0A0G2K930	Ras-related protein Rab-7a	Rab7a	11	11	11	64.3	23.504	0	120.05	1730800000	58					UPS	0.5737	Intracellular	0.8467	0.1112	0.0421	2.92995	0.000111332	-4.69872	-2.91251	+		+	49547300	9983500	5447400	NA	4	1	11	14	13	16	0	1	2	0	1	433810000	416480000	404410000	455210000	0	16281000
P62836	Ras-related protein Rap-1A	Rap1a	11	2	2	64.7	20.987	0	20.991	61979000	7					UPS	0.553	Intracellular	0.9148	0.0131	0.072	1.01344	0.0101074	-1.4303	-0.936245	+		+	1829050	NA	353336	NA	4	0	2	1	4	0	0	0	0	0	0	16121000	21169000	13534000	11156000	0	0
Q62636	Ras-related protein Rap-1b	Rap1b	12	12	3	69.6	20.798	0	34.769	2143800000	58					UPS	0.5522	Intracellular	0.9064	0.0134	0.0802	3.80068	0	-4.6001	-3.40842	+		+	63419800	3146500	12468800	2354700	4	4	20	12	12	11	0	0	2	0	1	591160000	578110000	427350000	494190000	0	15317000
D3Z8L7	Ras-related protein R-Ras	Rras	7	7	5	48.2	23.909	0	16.547	484510000	24					Intracellular	0.9326	Intracellular	0.7713	0.0031	0.2256	3.73118	0.000112676	-3.6603	-2.92806	+		+	14451500	NA	2964760	NA	4	0	4	10	4	6	0	0	0	0	0	122190000	143310000	85439000	133570000	0	0
B2RZ37	Receptor expression-enhancing protein 5	Reep5	2	2	2	10.6	21.431	0	166.15	169370000	4		+			Transmembrane	0.9937	Transmembrane	0.0006	0.0057	0.9937	2.4578	0.000189616	-2.83326	-2.01136	+		+	5097850	NA	2761160	NA	4	0	1	1	1	1	0	0	0	0	0	69400000	43997000	17061000	38913000	0	0
Q62703	Reticulocalbin-2	Rcn2	8	8	8	34.7	37.432	0	323.31	764420000	58	+			+	Signal-peptide	0.9999	Signal-peptide	0	0.9999	0.0001	5.02516	0	-5.826	-4.75379	+		+	22374800	NA	4434220	NA	4	0	13	14	19	12	0	0	0	0	0	159550000	181610000	224300000	194670000	0	0
F1LQN3;Q9JK11	Reticulon;Reticulon-4	Rtn4	20	20	20	38	126.4	0	309.91	4079600000	133		+			Intracellular	0.522	Intracellular	0.8354	0.0038	0.1608	3.66269	0	-6.24399	-3.92729	+		+	115880000	2704570	13767000	1126730	4	3	31	33	34	30	0	0	3	0	2	1039500000	1202600000	1099500000	689960000	0	27131000
A0A0H2UHX1;Q6RJR6	Reticulon-3	Rtn3	4	4	4	26.1	28.227	0	78.038	420580000	11		+			Transmembrane	0.607	Transmembrane	0.3855	0.0075	0.607	3.84843	0	-4.39807	-3.34389	+		+	12432800	NA	2688120	NA	4	0	2	4	3	2	0	0	0	0	0	126340000	127710000	91126000	75400000	0	0
Q920A6	Retinoid-inducible serine carboxypeptidase	Scpep1	8	8	8	23.2	51.174	0	55.902	1045500000	54	+			+	Signal-peptide	0.7849	Signal-peptide	0.0004	0.7849	0.2146	2.49278	8.6e-05	-4.27961	-2.51114	+		+	29240300	7796100	4383650	NA	4	1	11	12	14	11	0	0	0	6	0	215650000	273320000	244060000	293540000	0	1461200
Q5XI73	Rho GDP-dissociation inhibitor 1	Arhgdia	8	8	8	56.9	23.407	0	323.31	5690000000	123					UPS	0.5558	Intracellular	0.9983	0	0.0017	0.76732	0.0355652	-1.08651	-0.725023	+		+	132885000	79426000	22901000	47697200	4	4	17	18	17	22	0	22	10	5	12	1118600000	1068800000	1487600000	1065100000	0	262730000
A0A0G2JU01;A0A0G2K4L2;E9PTJ8;A0A0G2K446;Q9Z1I6	Rho guanine nucleotide exchange factor 1	Arhgef1	8	8	8	15.5	96.684	0	17.041	170860000	28					Intracellular	0.8763	Intracellular	0.9635	0.0006	0.0358	2.86347	0.000300107	-2.29726	-1.89925	+		+	4596800	NA	2128110	NA	4	0	4	4	8	10	0	0	0	0	2	30778000	16901000	65230000	44603000	0	0
A0A1B0GWY5;A0A0G2K0V4;Q5FVC2;A0A1B0GWW1;A0A1B0GWX6	Rho guanine nucleotide exchange factor 2	Arhgef2	5	5	5	10.6	110.14	0	18.054	78619000	13					Intracellular	0.8796	Intracellular	0.676	0.0004	0.3236	0.915111	0.00634298	-1.79839	-1.00027	+		+	2237500	NA	192893	NA	4	0	3	2	6	2	0	0	0	0	0	9208300	21471000	39545000	8395000	0	0
F1LQT3;A0A0G2K5N6;Q62868	Rho-associated protein kinase 2	Rock2	11	11	11	13.9	159.44	0	43.383	259460000	33					Intracellular	0.5708	Intracellular	0.8864	0	0.1136	5.09122	0	-3.27011	-3.16651	+		+	7602750	NA	561875	NA	4	0	6	15	5	7	0	0	0	0	0	61860000	78218000	68361000	50130000	0	497280
E2RUH2;A0A0G2K9E0;P29315	Ribonuclease inhibitor	Rnh1	21	21	21	83.8	49.919	0	323.31	2057800000	140					Intracellular	0.5368	Intracellular	0.9623	0	0.0377	0.707331	0.00807526	-2.28836	-0.963973	+		+	47884300	29004000	10799700	7337230	4	3	28	30	33	25	0	6	8	0	10	372850000	393780000	660020000	387670000	892450	66098000
A0A0G2JSV3;P60892;P09330;M0RBK1;A0A0G2JVA5	Ribose-phosphate pyrophosphokinase 1;Ribose-phosphate pyrophosphokinase 2	Prps1;Prps2;Prps1l1	4	4	4	14.2	34.806	0	18.68	156120000	24					UPS	0.558	Intracellular	0.9075	0.0029	0.0896	2.4424	0.00025	-2.78239	-1.98446	+		+	4606730	NA	508000	NA	4	0	5	8	5	6	0	0	0	0	0	38397000	38375000	41917000	37433000	0	0
D3Z8E0;A0A0G2JXA6;F1LYL8	Ribosomal protein S6 kinase	Rps6ka3	6	6	6	10.7	83.723	0	17.03	136060000	21					Intracellular	0.581	Intracellular	0.8533	0.0008	0.1459	2.15438	0.00145797	-1.46279	-1.25621	+		+	4003500	NA	504541	NA	4	0	6	5	5	5	0	0	0	0	0	29180000	37411000	37967000	31505000	0	0
Q5RK30	Ribosome maturation protein SBDS	Sbds	3	3	3	20.4	28.752	0	15.803	96900000	9					UPS	0.5518	Intracellular	0.9971	0.0025	0.0004	1.59977	0.00134807	-1.76025	-1.26296	+		+	2827720	NA	114297	NA	4	0	0	2	5	2	0	0	0	0	0	18494000	29138000	24986000	23328000	0	952360
A0A0A0MXW9;A0A0G2K8K9;P84586;D4AE41;Q4V898	RNA-binding motif protein, X chromosome retrogene-like;RNA-binding motif protein, X chromosome retrogene-like, N-terminally processed;RNA binding motif protein, X-linked-like-1;RNA-binding motif protein, X chromosome;RNA-binding motif protein, X chromosome, N-terminally processed	Rbmxrtl;Rbmxl1;Rbmx	4	4	4	12.2	40.07	0	9.7339	218490000	20					Intracellular	0.9345	Intracellular	0.9942	0.0002	0.0056	4.41536	9.77e-05	-2.89357	-2.70595	+		+	6363650	NA	319811	NA	4	0	3	4	4	6	0	2	0	0	1	52517000	56237000	39148000	65127000	0	1766900
G3V6P6;Q925G0;Q5PPI5	RNA-binding protein 3	Rbm3	6	6	6	53.8	16.983	0	38.963	379830000	17					Intracellular	0.9344	Intracellular	0.9519	0.0001	0.0481	3.57099	8.62e-05	-3.00111	-2.51254	+		+	9499400	NA	1289110	NA	4	0	6	4	1	6	0	0	0	0	0	99043000	91157000	74462000	115170000	0	0
P22509	rRNA 2-O-methyltransferase fibrillarin	Fbl	7	7	5	35.8	34.221	0	18.25	183700000	18					Intracellular	0.9345	Intracellular	0.7924	0.0028	0.2048	1.36903	0.00109032	-2.2444	-1.3393	+		+	6744630	NA	3094380	NA	3	0	8	0	8	2	0	0	0	0	0	104620000	7437400	48344000	23301000	0	0
P60123;A0A0G2K0H9	RuvB-like 1	Ruvbl1	9	9	9	30	50.213	0	26.324	295240000	25					Intracellular	0.5234	Intracellular	0.708	0.0052	0.2868	3.31569	9.74e-05	-3.58234	-2.70482	+		+	8752700	NA	1345200	NA	4	0	5	6	5	8	0	0	0	0	1	90283000	74141000	55046000	74120000	0	0
Q7TQ90;P12711	S-(hydroxymethyl)glutathione dehydrogenase;Alcohol dehydrogenase class-3	Adh4;Adh5	7	7	7	19	93.846	0	69.579	190610000	26					Intracellular	0.5184	Intracellular	0.9908	0.008	0.0012	3.43451	0.000150943	-2.72526	-2.31083	+		+	5201570	NA	788212	NA	4	0	6	9	6	4	0	1	0	0	0	45280000	43507000	39319000	47040000	0	9046100
Q6AY30	Saccharopine dehydrogenase-like oxidoreductase	Sccpdh	12	12	12	57.6	47.088	0	103.1	500850000	51					Intracellular	0.5826	Intracellular	0.8067	0.0091	0.1841	5.1177	0	-4.09347	-3.76137	+		+	14566500	NA	2199020	NA	4	0	13	14	12	12	0	0	0	0	0	149890000	135420000	91065000	124470000	0	0
P11507;Q64578;M0RCD2	Sarcoplasmic/endoplasmic reticulum calcium ATPase 2	Atp2a2	26	26	22	32.4	114.77	0	154.39	1310000000	102		+			Transmembrane	0.75	Transmembrane	0.0499	0.2001	0.75	4.4837	0	-5.87628	-4.41098	+		+	38649300	NA	6279610	NA	4	0	30	22	23	27	0	0	0	0	0	354050000	395960000	329610000	233380000	0	0
F1LRY5;Q64380	Sarcosine dehydrogenase, mitochondrial	Sardh	14	14	14	25.2	101.41	0	96.412	447880000	56					Intracellular	0.5485	Intracellular	0.9928	0.0033	0.0039	2.63218	0.000156425	-3.53387	-2.35637	+		+	13587900	NA	7366580	NA	4	0	14	18	3	21	0	0	0	0	0	111680000	125530000	25185000	183970000	0	1509700
M0RBF0;A0A0G2JZI0;O88453;A0A0G2JW97;M0R6E6	Scaffold attachment factor B1	Safb	5	5	5	14.3	104.41	0	20.222	150960000	18					Intracellular	0.8798	Intracellular	0.9326	0	0.0673	4.41392	8.86e-05	-2.66619	-2.54331	+		+	4444730	NA	474009	NA	4	0	1	6	4	7	0	0	0	0	0	42904000	41479000	39072000	27502000	0	0
Q62991	Sec1 family domain-containing protein 1	Scfd1	6	6	6	17.1	72.262	0	30.994	188260000	24					Intracellular	0.5668	Intracellular	0.5311	0.043	0.4259	3.16006	0.000215938	-2.73921	-2.22934	+		+	5581050	NA	1900360	NA	4	0	6	8	3	7	0	0	0	0	0	33992000	36662000	52620000	64985000	0	0
Q6AY84	Secernin-1	Scrn1	7	7	7	29.7	46.396	0	36.316	224150000	28					Intracellular	0.5431	Intracellular	0.9264	0.0003	0.0733	0.78204	0.00804187	-1.98111	-0.964588	+		+	6334300	7606200	1223280	NA	3	1	6	11	2	6	0	0	1	0	2	60841000	69068000	21996000	52511000	0	0
A0A0G2K1I6;P56603;A0A0G2JY82	Secretory carrier-associated membrane protein 1	Scamp1	3	3	3	25	33.955	0	30.571	211770000	8		+			Intracellular	0.5507	Intracellular	0.9836	0	0.0164	2.92721	0.000195804	-2.59173	-2.07481	+		+	6168270	NA	2366860	NA	4	0	1	4	2	1	0	0	0	0	0	28552000	114650000	48945000	19624000	0	0
A0A0G2JUL7;B3GNI6;B5DFG5;A0A0U1RRT8;A0A0U1RRW2	Septin-11	Sept11	20	20	18	56.9	49.341	0	201.51	5331100000	92					Intracellular	0.5035	Intracellular	0.9892	0.0002	0.0106	1.18678	0.00107538	-2.93761	-1.39684	+		+	139673000	45119700	21550500	11330600	4	3	17	21	20	22	0	4	2	1	5	1159200000	1280900000	1154400000	1436400000	0	92203000
Q91Y81	Septin-2	Sept2	18	17	17	67	41.592	0	323.31	6852400000	200					Intracellular	0.5605	Intracellular	0.8371	0.0372	0.1258	2.21595	0.000841739	-1.85605	-1.48677	+		+	168023000	51055300	32663200	23884100	4	4	40	38	33	52	0	12	13	1	11	1573200000	1708400000	1325100000	1873500000	0	102140000
D3ZDH8;D3ZT07;Q9JJM9	Septin-5	Sept5	6	6	6	27.8	43.892	0	43.186	228860000	22					Intracellular	0.5669	Intracellular	0.8973	0.0017	0.1009	1.73602	0.000849123	-2.27555	-1.50812	+		+	5944780	4613800	1764620	NA	4	1	6	8	4	4	0	0	0	0	0	71049000	66739000	46291000	38533000	0	6246900
F1LMC7;A0A0G2JZT5;D4A0F5;Q9WVC0;Q7TP92;A0A0G2JV25;A0A1W2Q660;D3ZHG7	Septin-7	Sept7	23	23	21	66.5	50.579	0	323.31	5591200000	149					Intracellular	0.6654	Intracellular	0.59	0.0094	0.4006	3.90076	0.000852863	-1.4608	-1.50987	+		+	135482000	49785000	14872300	10138100	4	4	31	32	23	34	0	11	5	1	12	1279600000	1326900000	1099700000	1306200000	0	149650000
G3V9Z6;A0A0G2K7G7;B0BNF1;A0A0G2JVY6	Septin-8	Sept8	14	12	12	47.8	49.856	0	91.849	1585700000	59					Intracellular	0.5688	Intracellular	0.9453	0.0001	0.0546	1.23593	0.000873484	-3.22088	-1.47866	+		+	42932300	11770300	11206400	3487980	4	3	15	14	11	13	0	3	2	0	1	421510000	469090000	243000000	372350000	0	21840000
Q9QZR6	Septin-9	Sept9	18	2	2	44.3	63.791	0.00041615	3.499	297360000	8					Intracellular	0.8798	Intracellular	0.9992	0.0001	0.0007	0.567162	0.0355214	-1.44655	-0.725777	+		+	10002100	NA	483568	NA	3	0	2	2	1	3	0	0	0	0	0	78906000	85309000	51255000	81885000	0	0
Q6TXG7	Serine hydroxymethyltransferase	Shmt1	4	3	3	8.8	75.373	0.00044643	4.44	39676000	7					Intracellular	0.5457	Intracellular	0.7463	0.2089	0.0448	0.0671705	0.823955	0.0857167	0.0683144				1300170	NA	152074	NA	3	0	1	0	3	3	0	0	0	0	0	8897800	6551300	13119000	11109000	0	0
Q5U3Z7	Serine hydroxymethyltransferase	Shmt2	26	26	24	73.4	55.764	0	195.38	4386700000	123					Intracellular	0.8795	Intracellular	0.987	0.0004	0.0126	4.46639	0	-6.76135	-4.77292	+		+	129711000	NA	27345500	NA	4	0	35	32	26	30	0	0	0	0	0	1141600000	1344400000	825090000	1075600000	0	0
Q6PDU1	Serine/arginine-rich splicing factor 2	Srsf2	4	4	4	21.7	25.476	0	14.648	173900000	22					Intracellular	0.9345	Intracellular	0.9999	0	0.0001	2.326	0.000360874	-2.18657	-1.68147	+		+	5056880	NA	688389	NA	4	0	5	5	8	4	0	0	0	0	0	21459000	58587000	59455000	34394000	0	0
Q09167	Serine/arginine-rich splicing factor 5	Srsf5	2	2	2	16.4	30.891	0.00043802	4.143	38415000	7					Intracellular	0.9345	Intracellular	0.9926	0	0.0074	0.554373	0.14661	-0.683084	-0.497132				1119870	NA	305929	NA	4	0	0	3	2	2	0	0	0	0	0	8149000	9151400	13595000	7519200	0	0
G3V6S8	Serine/arginine-rich splicing factor 6	Srsf6	3	3	3	13.3	39.025	0.00044883	4.4979	41701000	9					Intracellular	0.9345	Intracellular	0.952	0	0.048	1.36406	0.0387977	-0.787355	-0.710443	+		+	1202900	NA	332455	NA	4	0	1	2	4	2	0	0	0	0	0	8428700	10402000	17282000	5588100	0	0
H9KVF3;B0LT89	Serine/threonine-protein kinase 24;Serine/threonine-protein kinase 24 35 kDa subunit;Serine/threonine-protein kinase 24 12 kDa subunit	Stk24	4	4	3	19.1	46.809	0	11.525	50989000	11					Intracellular	0.5057	Intracellular	0.9503	0	0.0497	1.61339	0.279887	-0.324962	-0.357602				1495480	NA	218647	NA	4	0	0	5	4	2	0	0	0	0	0	11368000	11340000	16425000	11857000	0	0
A0A0G2KB58;Q7TT49	Serine/threonine-protein kinase MRCK beta	Cdc42bpb	6	6	6	7.5	194.14	0	29.089	100710000	20					Intracellular	0.7185	Intracellular	0.8828	0.0012	0.1159	3.15336	0.000338369	-2.00969	-1.80169	+		+	2985050	NA	413550	NA	4	0	5	5	4	6	0	0	0	0	0	11922000	27343000	25966000	35474000	0	0
A0A0G2JUP0;D3ZBE5	Serine/threonine-protein kinase Nek7	Nek7	3	3	3	15.9	38.55	0.00044803	4.4822	75799000	7					UPS	0.5381	Intracellular	0.7804	0.0002	0.2195	2.99664	0.000373281	-1.99453	-1.75696	+		+	2601300	NA	210786	NA	3	0	1	3	1	2	0	0	0	0	0	19729000	25329000	7912700	19149000	0	1559600
Q64303	Serine/threonine-protein kinase PAK 2;PAK-2p27;PAK-2p34	Pak2	8	8	3	23.3	57.96	0	114.15	308160000	27					Intracellular	0.5008	Intracellular	0.9932	0	0.0068	4.05131	0	-3.57413	-3.01517	+		+	8912130	NA	2662170	NA	4	0	5	6	9	7	0	0	0	0	0	60694000	48306000	137040000	62122000	0	0
P36876;A0A0G2JSQ0;P56932;A0A0G2K5X0;Z4YNW7;A0A0G2JWY9;A0A0G2K165;P36877;P97888	Serine/threonine-protein phosphatase 2A 55 kDa regulatory subunit B alpha isoform	Ppp2r2a	7	7	7	25.5	51.677	0	22.581	173550000	24					Intracellular	0.5453	Intracellular	0.9972	0.0001	0.0027	4.61345	0	-3.22692	-2.99485	+		+	5097250	NA	595172	NA	4	0	5	6	4	9	0	0	0	0	0	37809000	43002000	49822000	42512000	0	0
B2RYQ2	Serine/threonine-protein phosphatase 2A activator	Ppp2r4	9	9	9	54.2	36.617	0	46.372	215010000	40					UPS	0.6368	Intracellular	0.8806	0.0028	0.1166	0.595565	0.146561	-0.655893	-0.497001				4359200	3970700	543673	1538960	4	3	9	11	9	10	0	1	0	0	0	47963000	55298000	54620000	38623000	0	9145600
P62716;P63331;A0A0G2JYA4;G3V8M5;Q5BJ92	Serine/threonine-protein phosphatase 2A catalytic subunit beta isoform;Serine/threonine-protein phosphatase 2A catalytic subunit alpha isoform	Ppp2cb;Ppp2ca	11	11	11	60.5	35.575	0	103.58	447530000	66					UPS	0.5692	Intracellular	0.9392	0	0.0608	3.84377	0	-3.64155	-2.96677	+		+	12429000	2168000	1038040	NA	4	1	15	19	15	13	0	1	2	0	1	102950000	130990000	103450000	101940000	0	4409100
P63329;A0A0G2K7T5;P20651;E2CWF2	Serine/threonine-protein phosphatase 2B catalytic subunit alpha isoform	Ppp3ca	9	9	8	31.5	58.643	0	18.086	241120000	23					Intracellular	0.7162	Intracellular	0.9879	0.0004	0.0117	3.39008	0.000104089	-3.77023	-2.82466	+		+	7004020	NA	1647210	NA	4	0	5	3	9	6	0	0	0	0	0	48538000	54137000	66179000	68230000	0	2823300
Q64620	Serine/threonine-protein phosphatase 6 catalytic subunit;Serine/threonine-protein phosphatase 6 catalytic subunit, N-terminally processed	Ppp6c	3	3	3	13.4	35.159	0.00044287	4.2633	40145000	9					UPS	0.5703	Intracellular	0.9982	0.0001	0.0017	0.11327	0.660875	-0.189767	-0.133498				1456500	NA	181006	NA	3	0	3	2	2	2	0	0	0	0	0	12889000	3507400	10917000	12832000	0	0
P62138;A0A0G2JYS8	Serine/threonine-protein phosphatase PP1-alpha catalytic subunit	Ppp1ca	16	16	4	65.2	37.512	0	73.908	1150500000	78					Intracellular	0.5295	Intracellular	0.9755	0.0001	0.0244	4.46796	0	-4.1058	-3.49669	+		+	33400300	2391000	11876600	716299	4	2	18	23	18	16	0	1	1	0	1	262940000	214880000	356850000	290860000	0	4720600
P62142	Serine/threonine-protein phosphatase PP1-beta catalytic subunit	Ppp1cb	16	6	6	58.4	37.186	0	11.282	185350000	22					UPS	0.5349	Intracellular	0.9505	0.002	0.0475	2.34459	0.000339051	-2.44366	-1.80449	+		+	5342120	NA	842933	NA	4	0	5	5	5	5	0	0	1	0	1	40089000	29906000	62569000	49379000	0	0
Q5XIG8;M0RCV0	Serine-threonine kinase receptor-associated protein	Strap	6	6	6	25.7	38.456	0	215.74	161600000	28					UPS	0.6367	Intracellular	0.9242	0.01	0.0658	3.54891	0.000293501	-1.98894	-1.86958	+		+	4708800	NA	732754	NA	4	0	6	8	6	8	0	0	0	0	0	33656000	39906000	57098000	30941000	0	0
A0A0G2JZG7;Q6P799	Serine--tRNA ligase, cytoplasmic	Sars	15	15	15	40.3	61.362	0	159.59	1044500000	85					Intracellular	0.568	Intracellular	0.9606	0	0.0393	2.40743	8.32e-05	-4.20956	-2.43856	+		+	30477000	7079200	9050600	NA	4	1	19	17	25	20	0	1	0	0	3	129360000	199550000	361410000	314540000	0	4783700
Q6AXM8	Serum paraoxonase/arylesterase 2	Pon2	5	5	5	20.3	39.617	0	8.5801	125230000	17	+			+	Signal-peptide	0.5031	Signal-peptide	0.0188	0.5031	0.4781	3.68123	0.000245614	-2.04567	-1.93572	+		+	3599600	NA	1260100	NA	4	0	3	4	6	4	0	0	0	0	0	17330000	20026000	57315000	29878000	683840	0
B0BNE5	S-formylglutathione hydrolase	Esd	7	7	7	44.7	31.363	0	58.974	218850000	27					UPS	0.6335	Intracellular	0.9935	0.0014	0.0051	2.49749	0.000339737	-2.33392	-1.80638	+		+	6377370	NA	831908	NA	4	0	6	8	8	5	0	0	0	0	0	54686000	46317000	74542000	42651000	649990	0
B5DFD8	SH3 domain-binding glutamic acid-rich-like protein	Sh3bgrl	3	3	3	52.6	12.8	0	9.4738	159420000	20					UPS	0.616	Intracellular	0.8997	0.0089	0.0914	0.988995	0.00919196	-1.50589	-0.951699	+		+	3630000	3200650	655613	1185890	4	2	4	4	7	2	0	1	0	0	2	44055000	33150000	44192000	27881000	0	7156500
A0A0A0MY00;P70584	Short/branched chain specific acyl-CoA dehydrogenase, mitochondrial	Acadsb	12	12	12	42.6	52.042	0	40.905	766860000	40					UPS	0.5033	Intracellular	0.9835	0.0091	0.0075	2.77094	9.81e-05	-4.39821	-2.71929	+		+	23166500	NA	8642720	NA	4	0	10	12	3	15	0	0	0	0	0	217220000	238600000	63196000	247850000	0	0
Q6IMX3;P15651	Short-chain specific acyl-CoA dehydrogenase, mitochondrial	Acads	6	6	6	25.8	44.967	0	10.039	186410000	11					Intracellular	0.5448	Intracellular	0.8939	0.0034	0.1027	3.87541	8.97e-05	-2.92493	-2.56822	+		+	5630820	NA	1654590	NA	4	0	3	4	0	4	0	0	0	0	0	83441000	36181000	18828000	47956000	0	0
Q99PW3;Q6MG70;A0A0G2JZ10	Sialidase-1	Neu1	5	5	5	22.2	44.695	0	62.278	179100000	29	+			+	Signal-peptide	0.8091	Signal-peptide	0.0363	0.8091	0.1546	1.19289	0.00786872	-1.34768	-0.966012	+		+	4805200	2467800	740074	NA	4	1	7	7	6	6	0	0	0	3	0	43817000	47722000	52891000	30759000	0	0
Q63965;Q6AYS2	Sideroflexin-1;Sideroflexin	Sfxn1	10	9	9	51.2	35.546	0	107.87	686970000	40		+			UPS	0.5611	Intracellular	0.9256	0	0.0744	4.12352	0	-5.11144	-3.8282	+		+	20276500	NA	3767560	NA	4	0	11	12	8	9	0	0	0	0	0	186630000	209580000	159490000	131260000	0	0
Q9JHY2	Sideroflexin-3	Sfxn3	12	12	2	58.3	35.433	0	56.485	964400000	52		+			UPS	0.5653	Intracellular	0.9398	0	0.0602	4.39439	0	-4.8629	-3.8703	+		+	26816000	NA	4002160	NA	4	0	16	9	18	9	0	0	0	0	0	254450000	268390000	251720000	189830000	0	0
Q6P9X2;P42667	Signal peptidase complex catalytic subunit SEC11;Signal peptidase complex catalytic subunit SEC11A	Sec11a	3	3	3	25.7	20.626	0	6.9956	98827000	13		+			Transmembrane	0.9277	Transmembrane	0.0719	0.0004	0.9277	3.22115	0.000336673	-1.96703	-1.78845	+		+	2906420	NA	391733	NA	4	0	6	2	2	3	0	0	0	0	0	27745000	24393000	27701000	18988000	0	0
Q6AYB5	Signal recognition particle 54 kDa protein	Srp54	5	5	5	13.7	55.704	0	16.165	84711000	11					Intracellular	0.5003	Intracellular	0.9314	0	0.0686	2.74162	0.000581952	-1.81995	-1.59259	+		+	2376450	NA	574045	NA	4	0	2	2	4	3	0	0	0	0	0	18179000	11791000	39627000	13035000	0	0
B2RYI2	Signal recognition particle subunit SRP68	Srp68	11	11	11	29.8	70.491	0	154.74	149060000	24					Intracellular	0.6322	Intracellular	0.9736	0.016	0.0104	2.78274	0.000344615	-2.23364	-1.84154	+		+	4345570	NA	619356	NA	4	0	3	10	7	4	0	0	0	0	0	24199000	42963000	50870000	31034000	0	0
D4A7R0	Signal recognition particle subunit SRP72	Srp72	12	12	9	28.8	74.651	0	40.141	239010000	43					Intracellular	0.6803	Intracellular	0.8556	0.0003	0.1441	4.59737	0	-3.29703	-3.03778	+		+	7020770	NA	730555	NA	4	0	10	9	12	12	0	0	0	0	0	54348000	68021000	67333000	49307000	0	0
F1M9D6;A0A0G2JX93	Signal transducer and activator of transcription	Stat1	11	11	11	22.8	87.249	0	66.418	260440000	24					UPS	0.5207	Intracellular	0.9892	0	0.0108	4.47435	0	-3.24135	-2.96106	+		+	7742970	NA	1883390	NA	4	0	6	2	8	8	0	0	0	0	0	61645000	41057000	63677000	93180000	0	0
P52631	Signal transducer and activator of transcription 3	Stat3	11	11	11	25.2	88.039	0	27.327	228730000	32					Intracellular	0.6589	Intracellular	0.9447	0.0002	0.0551	3.50109	9.12e-05	-3.20414	-2.59726	+		+	6353450	NA	936898	NA	4	0	3	9	10	10	0	0	0	0	0	45414000	69134000	49149000	65034000	0	0
A0A0G2K747;G3V7K6;P28042	Single-stranded DNA-binding protein, mitochondrial	Ssbp1	2	2	2	22.3	17.17	0	33.05	46965000	9					Intracellular	0.9344	Intracellular	0.9985	0.0001	0.0015	0.764239	0.0750204	-0.804347	-0.609863				1405200	NA	381915	NA	4	0	2	2	2	3	0	0	0	0	0	11777000	9436200	9547400	16205000	0	0
O70593	Small glutamine-rich tetratricopeptide repeat-containing protein alpha	Sgta	2	2	2	8.6	34.157	0	5.5498	64958000	8					UPS	0.5757	Intracellular	0.9852	0.0121	0.0027	1.84936	0.00562385	-1.15894	-1.01761	+		+	2291130	NA	400446	NA	3	0	1	3	0	4	0	0	0	0	0	15998000	18890000	8706800	21363000	0	0
P63164;P17136;Q5XII7	Small nuclear ribonucleoprotein-associated protein N;Small nuclear ribonucleoprotein-associated protein B	Snrpn;Snrpb	5	5	5	20.4	24.614	0	7.4164	146880000	20					Intracellular	0.9326	Intracellular	0.7491	0	0.2509	4.75194	9.51e-05	-2.7222	-2.6648	+		+	4231800	NA	325308	NA	4	0	4	8	3	4	0	1	0	0	0	29017000	40906000	39881000	34117000	106480	2684400
A0A0G2K583;Q7TP15	S-methyl-5-thioadenosine phosphorylase	Mtap	5	5	5	31.1	31.089	0	35.43	189710000	22	+			+	UPS	0.5551	Intracellular	0.9863	0.0009	0.0128	2.79706	0.000201681	-2.78445	-2.12322	+		+	5149170	NA	699656	NA	4	0	3	5	5	5	0	2	1	0	1	40856000	31214000	61518000	47507000	0	4869800
P06685;P06687;A0A0G2JWS9;F1LRK1;G3V8S4;P09626;P54708	Sodium/potassium-transporting ATPase subunit alpha-1	Atp1a1	33	33	21	41.8	113.05	0	323.31	3351200000	142		+			Intracellular	0.525	Intracellular	0.9644	0	0.0356	3.63564	0	-4.34983	-3.20664	+		+	95838500	5292480	31736400	2772310	4	4	28	29	43	22	0	7	4	5	4	723910000	814810000	1119400000	624150000	0	21726000
Q63377	Sodium/potassium-transporting ATPase subunit beta-3	Atp1b3	5	5	5	22.2	31.829	0	27.793	269480000	22		+			Transmembrane	0.9999	Transmembrane	0	0.0001	0.9999	5.59375	0	-2.88982	-2.98268	+		+	7970970	NA	1563910	NA	4	0	5	4	6	6	0	1	0	0	0	72873000	67274000	56053000	71723000	0	1556800
Q63632;G3V6N7;A0A0G2K6T0	Solute carrier family 12 member 4	Slc12a4	5	5	5	7.1	120.63	0	7.1824	80400000	11		+			Intracellular	0.5574	Intracellular	0.9151	0.0001	0.0849	1.51193	0.00970876	-1.13152	-0.940806	+		+	2371380	NA	380587	NA	4	0	3	3	4	1	0	0	0	0	0	17278000	23498000	20581000	19044000	0	0
F1LPM3;O35413	Sorbin and SH3 domain-containing protein 2	Sorbs2	7	7	7	11.3	134.14	0	51.05	405640000	24					Intracellular	0.6358	Intracellular	0.7677	0.0006	0.2317	2.83836	8.64e-05	-3.68643	-2.51693	+		+	11855200	NA	5209930	NA	4	0	12	6	5	1	0	0	0	0	0	138860000	150510000	51505000	57529000	0	3795200
P27867	Sorbitol dehydrogenase	Sord	5	5	5	28	38.234	0	19.357	179030000	22					UPS	0.6161	Intracellular	0.9233	0	0.0767	0.685342	0.0136703	-1.915	-0.889927	+		+	3739530	7993100	1275070	NA	4	1	3	6	6	7	0	0	0	0	0	32919000	21149000	59110000	46336000	0	3873500
Q6AXV4	Sorting and assembly machinery component 50 homolog	Samm50	7	7	7	22.8	51.96	0	10.792	207760000	15					Intracellular	0.5461	Intracellular	0.9577	0	0.0423	2.39996	0.000303688	-2.6354	-1.90701	+		+	6170750	NA	2428010	NA	4	0	8	4	1	2	0	0	0	0	0	99665000	64510000	29650000	13936000	0	0
D3ZZ38	Sorting nexin	Snx18	5	5	5	14.8	67.866	0	22.394	139630000	16					Intracellular	0.5399	Intracellular	0.9955	0.0002	0.0044	2.18672	0.000345679	-2.69769	-1.84612	+		+	4128080	NA	608114	NA	4	0	7	3	2	4	0	0	0	0	0	43744000	43641000	29132000	23109000	0	0
Q99N27	Sorting nexin-1	Snx1	5	4	4	11.9	59.044	0	59.009	145440000	16					Intracellular	0.5656	Intracellular	0.9201	0.0001	0.0798	3.73943	0.000217899	-2.49198	-2.25442	+		+	4331900	NA	961195	NA	4	0	2	6	4	4	0	0	0	0	0	29883000	38915000	30471000	46166000	0	0
Q6AYS6;F1LMM2;A0A0G2JXV4	Sorting nexin-17	Snx17	4	4	4	14.9	52.882	0	12.851	67059000	15					Intracellular	0.9323	Intracellular	0.8919	0.0011	0.1071	0.81725	0.0193995	-1.32556	-0.823974	+		+	2196130	NA	251174	NA	3	0	4	3	7	1	0	0	0	0	0	23356000	13355000	20218000	10130000	0	0
Q5U211	Sorting nexin-3	Snx3	5	5	5	42.6	18.762	0	17.039	227300000	18					Intracellular	0.9345	Intracellular	0.9559	0	0.0441	5.47391	0.000101818	-2.69729	-2.7946	+		+	5299750	NA	766669	NA	4	0	3	5	7	3	0	0	0	0	0	37830000	41971000	59892000	43887000	0	10416000
B1H267	Sorting nexin-5	Snx5	5	5	5	15.8	46.793	0	107.59	130450000	26					Intracellular	0.5647	Intracellular	0.9969	0.0003	0.0028	3.0377	0.000250559	-2.36725	-1.98803	+		+	3937250	NA	611935	NA	4	0	8	7	3	8	0	0	0	0	0	33153000	29942000	17475000	49876000	0	0
Q6IRK8;P16086;A0A0G2K1E7;A0A0G2JZ69;A0A0G2K1Y8	Spectrin alpha chain, non-erythrocytic 1	Sptan1	85	85	85	50.5	282.38	0	323.31	6213900000	360					Intracellular	0.5476	Intracellular	0.9892	0	0.0108	1.84504	0.000193772	-4.14271	-2.05671	+		+	174295000	24537300	23544600	14862200	4	3	85	80	78	97	0	9	3	0	8	1443900000	1712400000	1331100000	1559100000	0	44183000
A0A0G2K4X8;Q6PEC4	S-phase kinase-associated protein 1	Skp1	2	2	2	18.8	18.931	0	11.859	55942000	10					UPS	0.6368	Intracellular	0.9549	0	0.0451	0.32884	0.306158	-0.476163	-0.336235				1674140	NA	1020700	NA	4	0	3	2	2	3	0	0	0	0	0	13846000	24351000	5021200	12724000	0	0
Q5XIA6	Sphingomyelin phosphodiesterase	Smpd1	3	3	3	9.1	69.76	0	10.277	35759000	6		+			Transmembrane	0.978	Transmembrane	0.0016	0.0203	0.978	0.246154	0.484901	-0.272913	-0.218138				1233710	1086700	273022	NA	3	1	3	0	0	2	0	0	0	1	0	6646800	0	11443000	13753000	0	550080
Q8CHN6	Sphingosine-1-phosphate lyase 1	Sgpl1	5	5	5	16.7	63.758	0	9.7138	141350000	12		+			Transmembrane	0.8974	Transmembrane	0.0414	0.0612	0.8974	2.58337	0.000363289	-2.07294	-1.69938	+		+	4107980	NA	1689550	NA	4	0	4	3	4	1	0	0	0	0	0	42790000	26494000	53102000	18961000	0	0
Q63413;A0A0G2KAT4	Spliceosome RNA helicase Ddx39b	Ddx39b	14	14	8	53.3	49.035	0	111.37	1176600000	74					Intracellular	0.5658	Intracellular	0.9907	0.0005	0.0088	2.32226	8.82e-05	-4.86463	-2.53988	+		+	34175500	2680770	5837620	1313560	4	3	23	17	10	19	0	2	1	0	2	272380000	274140000	315240000	284600000	0	13006000
Q3KR55;Q7TP17	Splicing factor U2AF 26 kDa subunit	U2af1;U2af1l4	3	3	3	16.7	27.815	0	9.7027	84439000	10					Intracellular	0.9345	Intracellular	0.9634	0.0001	0.0365	1.46415	0.00274814	-1.54128	-1.1289	+		+	2517000	NA	737291	NA	4	0	3	2	2	3	0	0	0	0	0	22902000	23797000	15424000	22317000	0	0
D3ZGE6;A0A0G2JZ13;Q66HL2;A0A1B0GWS4	Src substrate cortactin	Cttn	12	12	12	25.1	61.077	0	150.33	1018100000	45					UPS	0.5011	Intracellular	0.9893	0.0001	0.0105	7.10759	0	-5.86329	-5.91962	+		+	29922800	NA	2749140	NA	4	0	11	10	12	12	0	0	0	0	0	261090000	274930000	283710000	198370000	0	0
Q66X93;D4A8Y5	Staphylococcal nuclease domain-containing protein 1	Snd1	34	34	34	55.6	101.95	0	323.31	3680000000	164					Intracellular	0.7259	Intracellular	0.7646	0.0614	0.174	3.60782	0	-6.29539	-3.89854	+		+	107170000	1551350	52049300	211213	4	2	38	41	43	42	0	0	0	0	0	899860000	894270000	1145300000	721220000	11841000	3714300
Q5PPL3	Sterol-4-alpha-carboxylate 3-dehydrogenase, decarboxylating	Nsdhl	3	3	3	11.3	40.411	0	6.1398	92474000	10		+			UPS	0.5287	Intracellular	0.8416	0.0002	0.1582	1.55542	0.00885219	-1.1424	-0.955321	+		+	2681300	NA	791579	NA	4	0	2	1	3	4	0	0	0	0	0	33949000	12460000	32617000	12780000	667420	0
Q4FZT0	Stomatin-like protein 2, mitochondrial	Stoml2	9	9	9	45.6	38.413	0	39.642	322270000	28					Transmembrane	0.5043	Transmembrane	0.4633	0.0324	0.5043	4.14164	0	-3.39576	-2.94526	+		+	9565720	NA	2508120	NA	4	0	3	10	4	11	0	0	0	0	0	49008000	113730000	65251000	94281000	0	0
F1M953;P48721	Stress-70 protein, mitochondrial	Hspa9	38	38	38	69.4	73.744	0	323.31	9748100000	290					Intracellular	0.6667	Intracellular	0.7381	0.0015	0.2604	5.38179	0	-6.72058	-5.47868	+		+	280400000	3011680	38201100	1899260	4	4	76	75	57	75	0	4	1	0	2	2314600000	2970600000	1771200000	2617400000	0	20513000
O35814	Stress-induced-phosphoprotein 1	Stip1	12	12	12	26.3	62.569	0	31.211	769300000	34					Intracellular	0.5874	Intracellular	0.9492	0	0.0508	4.69762	0	-5.01451	-4.12038	+		+	20189200	NA	1259760	NA	4	0	6	7	6	14	0	1	0	0	0	158940000	190990000	153500000	177540000	0	33654000
E9PT82;P58405	Striatin-3	Strn3	4	4	4	9.2	77.628	0	6.063	107020000	10					UPS	0.5022	Intracellular	0.7103	0.0027	0.2869	1.65865	0.00145455	-1.69776	-1.25478	+		+	3180120	NA	1328730	NA	4	0	3	2	2	3	0	0	0	0	0	18719000	48541000	15151000	24606000	0	0
Q920L2	Succinate dehydrogenase [ubiquinone] flavoprotein subunit, mitochondrial	Sdha	20	20	20	54.4	71.614	0	107.73	1553700000	92					Intracellular	0.5692	Intracellular	0.7009	0.0084	0.2907	3.35188	0	-5.30911	-3.39168	+		+	45440000	NA	7121830	NA	4	0	23	26	18	25	0	0	0	0	0	379560000	460280000	364540000	349290000	0	0
P21913	Succinate dehydrogenase [ubiquinone] iron-sulfur subunit, mitochondrial	Sdhb	4	4	4	17.4	31.83	0	6.8985	291430000	11					UPS	0.5533	Intracellular	0.8828	0.0091	0.1081	5.52257	0	-3.41175	-3.3948	+		+	8677480	NA	1661410	NA	4	0	3	3	1	4	0	0	0	0	0	62457000	83878000	58212000	86879000	0	0
A0A0H2UHE1;P13086	Succinyl-CoA ligase [ADP/GDP-forming] subunit alpha, mitochondrial	Suclg1	8	8	8	33.1	37.559	0	51.325	818050000	27					UPS	0.6142	Intracellular	0.5238	0.0968	0.3794	6.17398	0	-5.41284	-5.14356	+		+	24358700	NA	4854370	NA	4	0	9	6	5	7	0	0	0	0	0	259670000	207880000	156870000	193620000	0	0
F1LPV8	Succinyl-CoA ligase subunit beta	Suclg2	9	9	9	30.4	46.638	0	36.72	515480000	40					Intracellular	0.5005	Intracellular	0.9984	0.0005	0.0012	6.14576	0	-4.26588	-4.26132	+		+	15285300	NA	2227630	NA	4	0	10	10	9	11	0	0	0	0	0	119010000	140840000	117870000	137770000	0	0
F1LM47	Succinyl-CoA ligase subunit beta	Sucla2	13	13	13	34	50.306	0	146	1346100000	43					Intracellular	0.5006	Intracellular	0.8853	0.0106	0.104	3.73892	0	-5.14411	-3.59601	+		+	40155000	NA	11215400	NA	4	0	9	10	10	14	0	0	0	0	0	329520000	441350000	217850000	357340000	0	0
B2GV06	Succinyl-CoA:3-ketoacid coenzyme A transferase 1, mitochondrial	Oxct1	14	14	14	38.3	56.203	0	323.31	1121300000	62					Transmembrane	0.4067	Transmembrane	0.3902	0.2031	0.4067	4.4948	0	-5.59238	-4.28786	+		+	33328700	NA	4430330	NA	4	0	21	19	13	9	0	0	0	0	0	294640000	311250000	183940000	329570000	0	0
Q6AXQ0	SUMO-activating enzyme subunit 1;SUMO-activating enzyme subunit 1, N-terminally processed	Sae1	6	6	6	32.1	38.512	0	38.073	196100000	17					UPS	0.5974	Intracellular	0.8331	0.0012	0.1657	3.08744	0.000149333	-2.90715	-2.28989	+		+	5864180	NA	1522350	NA	4	0	4	2	5	6	0	0	0	0	0	46335000	42247000	39798000	67722000	0	0
A0A0G2KB55;P63281	SUMO-conjugating enzyme UBC9	Ube2i	2	2	2	27.2	17.347	0	23.29	77905000	10					UPS	0.573	Intracellular	0.9269	0.0003	0.0728	3.20679	0.000849868	-1.56997	-1.50841	+		+	2307850	NA	324759	NA	4	0	4	1	0	5	0	0	0	0	0	19105000	20536000	18367000	19897000	0	0
P07632	Superoxide dismutase [Cu-Zn]	Sod1	6	6	6	36.4	15.911	0	11.497	2193400000	29					UPS	0.5771	Intracellular	0.9516	0.0001	0.0483	0.795292	0.00327112	-2.82386	-1.10203	+		+	53324500	24407300	17205200	3910160	4	3	4	6	10	4	0	2	0	0	3	661010000	524070000	610780000	255380000	0	46534000
P07895	Superoxide dismutase [Mn], mitochondrial	Sod2	5	5	5	41.9	24.674	0	72.365	889990000	24					UPS	0.6182	Intracellular	0.9609	0.0001	0.039	3.92543	0	-5.06429	-3.68351	+		+	25873500	NA	7293820	NA	4	0	7	6	5	6	0	0	0	0	0	209940000	300060000	141190000	217310000	0	6910100
B0BN85;F1LMY6	Suppressor of G2 allele of SKP1 homolog	Sugt1	3	3	3	12.2	38.09	0.00042571	3.7669	146680000	6					UPS	0.6367	Intracellular	0.9992	0.0004	0.0004	4.60702	8.35e-05	-2.47614	-2.44322	+		+	4398830	NA	558068	NA	4	0	2	1	1	2	0	0	0	0	0	38084000	36583000	23941000	48069000	0	0
Q3MIE4	Synaptic vesicle membrane protein VAT-1 homolog	Vat1	17	17	17	58.4	43.118	0	316.81	5163300000	237					Intracellular	0.5827	Intracellular	0.4241	0.17	0.4059	2.08827	0.00107268	-1.73907	-1.39338	+		+	123578000	41486200	8752730	18632200	4	4	33	40	50	50	0	21	12	6	25	951860000	1230400000	1344400000	1175500000	0	131590000
Q5EGY4	Synaptobrevin homolog YKT6	Ykt6	3	3	3	28.3	22.369	0	13.565	79259000	13					UPS	0.5522	Intracellular	0.7806	0.0014	0.218	1.40862	0.0135328	-1.07966	-0.891971	+		+	2300750	NA	876561	NA	4	0	4	3	4	2	0	0	0	0	0	27692000	16915000	24387000	9639300	0	625990
Q64375;D4ABF0	Synaptonemal complex protein SC65	Leprel4;P3h4	7	7	7	26.6	51.103	0	36.276	321400000	33	+			+	Signal-peptide	0.9017	Signal-peptide	0.0108	0.9017	0.0875	6.36293	0	-3.68614	-3.8409	+		+	9390850	NA	984058	NA	4	0	8	8	11	6	0	0	0	0	0	77254000	84963000	97856000	60524000	0	0
Q6IRK3;P34900	Syndecan;Syndecan-2	Sdc2	2	2	2	9.5	23.219	0.00041999	3.595	38168000	5	+	+			Signal-peptide	0.8649	Signal-peptide	0.0347	0.8649	0.1004	1.50877	0.0109787	-1.10184	-0.923651	+		+	1478200	NA	232892	NA	3	0	2	1	0	2	0	0	0	0	0	14062000	9807700	1917000	12381000	0	0
A0A0G2K4U8;A0A0G2JVB6;G3V7P1	Syntaxin-12	Stx12	4	4	4	21.3	31.106	0	12.156	173330000	21		+			UPS	0.5293	Intracellular	0.9241	0	0.0759	2.78912	0.000190909	-2.60355	-2.03416	+		+	5077200	NA	722741	NA	4	0	5	6	5	5	0	0	0	0	0	51199000	43597000	42270000	34812000	0	1450700
Q08851	Syntaxin-5	Stx5	2	2	2	9.9	39.75	0	4.8853	64339000	10		+			Intracellular	0.5343	Intracellular	0.9548	0.0027	0.0425	0.708705	0.0812482	-0.810854	-0.597625				1947400	NA	580072	NA	3	0	4	1	3	2	0	0	0	0	0	15109000	14261000	22272000	12697000	0	0
O70257;M0R930;A0A0G2K6Y9	Syntaxin-7	Stx7;LOC100910446	6	6	6	36.4	29.85	0	31.691	211600000	22		+			UPS	0.5497	Intracellular	0.9005	0	0.0995	2.5706	0.000161383	-3.77946	-2.40732	+		+	6241500	NA	1561210	NA	4	0	4	7	4	7	0	0	0	0	0	65119000	70919000	45109000	30448000	0	0
P28480;A0A096MJA0	T-complex protein 1 subunit alpha	Tcp1	26	26	26	70.1	60.359	0	186.1	3451900000	185					Intracellular	0.5865	Intracellular	0.9339	0.0001	0.066	1.18984	0.00090223	-3.3298	-1.46451	+		+	88044500	24322000	4521220	1829760	4	3	40	47	37	43	0	6	4	0	8	733170000	961020000	865130000	765180000	0	42658000
Q5XIM9	T-complex protein 1 subunit beta	Cct2	27	27	27	75.5	57.458	0	169.47	3824400000	155					Intracellular	0.5783	Intracellular	0.7904	0.0196	0.19	2.05552	0.000196033	-3.63922	-2.07525	+		+	104927000	12455300	18837000	8207510	4	4	38	30	33	30	0	8	8	1	7	898860000	890810000	896730000	1016200000	0	48226000
Q7TPB1	T-complex protein 1 subunit delta	Cct4	20	20	20	57.3	58.099	0	136.24	3521900000	145					Intracellular	0.5872	Intracellular	0.8243	0.0001	0.1757	1.50964	0.000367505	-3.57566	-1.72371	+		+	89438200	18212000	4594010	2692190	4	3	28	31	32	30	0	8	9	0	7	802510000	847900000	885400000	876240000	0	31774000
Q68FQ0	T-complex protein 1 subunit epsilon	Cct5	21	21	21	59.1	59.536	0	144.94	2367700000	103					Intracellular	0.5865	Intracellular	0.978	0.0001	0.0219	2.10028	0.000209476	-3.95904	-2.18268	+		+	61989500	8102870	11026100	2796030	4	3	23	26	17	26	0	4	4	0	3	605400000	625000000	517270000	572910000	0	13457000
Q6P502	T-complex protein 1 subunit gamma	Cct3	21	21	21	54.5	60.646	0	56.918	3070000000	122					Intracellular	0.5892	Intracellular	0.8888	0.0001	0.1111	1.34902	0.000575592	-3.3351	-1.5739	+		+	82273200	20273700	13827800	4470070	4	3	30	27	25	31	0	2	3	0	4	848060000	832860000	591040000	658260000	0	40172000
Q6P9V1;Q62745	Tetraspanin;CD81 antigen	Cd81	4	4	4	27.5	25.904	0	60.434	680560000	54		+			Transmembrane	0.9625	Transmembrane	0.001	0.0366	0.9625	0.311131	0.224884	-0.737744	-0.409859				14166200	17020700	1077870	2506260	4	3	5	5	13	12	0	12	0	4	3	142920000	113290000	148880000	113620000	0	59402000
A0A0G2KAW4;P24155	Thimet oligopeptidase	Thop1	4	4	4	9.2	73	0	18.009	173590000	15					Intracellular	0.7017	Intracellular	0.8532	0.0002	0.1466	0.901004	0.0195003	-1.22602	-0.823231	+		+	3819070	5631800	990757	NA	4	1	4	4	4	2	0	0	0	0	1	32324000	46476000	26499000	38929000	0	9113900
P11232;R4GNK3	Thioredoxin	Txn	3	3	3	26.7	11.673	0	14.97	382710000	18					UPS	0.6176	Intracellular	0.9209	0.0001	0.079	4.97961	0	-4.13091	-3.73093	+		+	10686000	NA	1754800	NA	4	0	5	3	2	4	0	0	2	0	2	97411000	93828000	96607000	74853000	0	0
O89049;R9PXU4;A0A0G2JUN7	Thioredoxin reductase 1, cytoplasmic	Txnrd1	11	11	11	35.1	54.67	0	85.895	401620000	54					Intracellular	0.5585	Intracellular	0.9603	0.0038	0.0359	0.785998	0.0127278	-1.66521	-0.900358	+		+	9639170	6242070	1593530	1293220	4	3	12	10	16	5	0	4	2	0	5	86380000	93223000	103950000	71170000	0	12870000
P97615	Thioredoxin, mitochondrial	Txn2	2	2	2	27.7	18.232	0	4.8287	57991000	8					UPS	0.5734	Intracellular	0.8734	0.0433	0.0833	1.27545	0.0154385	-1.08146	-0.865214	+		+	1734010	NA	592466	NA	4	0	2	4	1	1	0	0	0	0	0	14734000	18723000	8558500	15975000	0	0
G3V7I0;Q9Z0V6	Thioredoxin-dependent peroxide reductase, mitochondrial	Prdx3	10	10	10	47.9	28.299	0	67.951	2554900000	59					UPS	0.6368	Intracellular	0.921	0.0095	0.0695	4.90577	0	-6.79917	-5.14849	+		+	74765500	NA	20457200	NA	4	0	11	14	9	25	0	0	0	0	0	460730000	535910000	645310000	895760000	0	2987500
A0A0G2K737;Q920J4	Thioredoxin-like protein 1	Txnl1	9	9	9	56.2	32.7	0	37.601	507240000	34					UPS	0.6047	Intracellular	0.9565	0.0005	0.043	2.22568	0.000200957	-3.42574	-2.10999	+		+	13592500	6152600	1428880	NA	4	1	8	9	7	7	0	1	0	0	2	100990000	119270000	151390000	106350000	0	13733000
A0A0G2K9V6;Q5XHY5	Threonine--tRNA ligase, cytoplasmic	Tars	12	12	11	25.3	83.388	0	26.345	645310000	50					Intracellular	0.5504	Intracellular	0.9265	0	0.0735	3.10763	8.46e-05	-3.23944	-2.45662	+		+	18269700	4380800	5117300	NA	4	1	10	13	16	11	0	0	0	0	0	111850000	150630000	175540000	196820000	0	2154800
P01830	Thy-1 membrane glycoprotein	Thy1	6	6	6	41	18.172	0	15.087	2810000000	39	+			+	Signal-peptide	0.6086	Signal-peptide	0.2782	0.6086	0.1132	0.78395	0.00320886	-2.94667	-1.10729	+		+	68586500	32244000	12285700	6941900	4	3	6	7	5	11	0	4	4	0	2	648760000	711410000	545920000	674700000	0	92450000
A0A0G2JSJ8;P17164	Tissue alpha-L-fucosidase	Fuca1	6	6	6	27.7	53.472	0	15.817	240160000	31	+			+	Signal-peptide	0.9702	Signal-peptide	0.0014	0.9702	0.0284	2.02129	0.000824264	-2.0825	-1.53634	+		+	6276120	4467300	1240470	NA	4	1	4	6	9	10	0	0	0	2	0	40412000	56534000	80700000	50629000	0	0
A2RUW1	Toll-interacting protein	Tollip	4	4	4	28.8	30.314	0	33.087	91932000	25					UPS	0.5196	Intracellular	0.842	0.0007	0.1574	2.98995	0.00267564	-1.11901	-1.13189	+		+	2719680	NA	446160	NA	4	0	6	7	6	6	0	0	0	0	0	22098000	17059000	26005000	26771000	0	0
Q5PQX1;Q6P752	Torsin-1A-interacting protein 1	Tor1aip1	11	11	11	35.3	65.648	0	35.65	452080000	32		+			Intracellular	0.8796	Intracellular	0.8686	0.0002	0.1312	3.90277	0	-3.64125	-2.99155	+		+	13257200	NA	1004030	NA	4	0	5	10	6	11	0	0	0	0	0	96019000	139660000	128320000	88088000	0	0
Q9EQS0	Transaldolase	Taldo1	6	6	6	27.9	37.46	0	17.035	393550000	24					UPS	0.6173	Intracellular	0.9777	0.0005	0.0218	1.72627	0.000244541	-3.9269	-1.93433	+		+	9982650	8027800	1933850	NA	4	1	8	7	3	2	0	2	2	0	0	107760000	114420000	60257000	90443000	0	10719000
P83941;A0A0G2K2A0;A0A096MIY6	Transcription elongation factor B polypeptide 1	Tceb1	3	3	3	34.8	12.473	0.00041203	3.3656	108570000	7					UPS	0.5946	Intracellular	0.7972	0	0.2027	1.2764	0.00236802	-1.78049	-1.15596	+		+	3626470	NA	566257	NA	3	0	0	2	4	1	0	0	0	0	0	14570000	32098000	37467000	24435000	0	0
A0A140TA99;F1LZ51;P62870;F1M937	Transcription elongation factor B polypeptide 2	RGD1565653;Tceb2;LOC684822	2	2	2	29.1	13.039	0	6.2549	71898000	11					Intracellular	0.6134	Intracellular	0.9998	0	0.0001	2.67548	0.00152056	-1.30929	-1.24205	+		+	2115400	NA	123946	NA	4	0	1	3	3	4	0	0	0	0	0	15258000	21001000	19538000	16101000	0	0
Q5U3Y8;M0R5M7	Transcription factor BTF3	Btf3	3	3	3	46.9	17.699	0	20.592	228990000	13					Intracellular	0.5544	Intracellular	0.943	0.0001	0.0569	3.26578	8.92e-05	-3.30225	-2.55228	+		+	6559550	NA	2077950	NA	4	0	3	4	4	2	0	0	0	0	0	51152000	42551000	110330000	24958000	0	0
O08629	Transcription intermediary factor 1-beta	Trim28	15	15	15	39.5	88.955	0	139.98	603560000	71					Intracellular	0.7313	Intracellular	0.8192	0.028	0.1528	4.9225	0	-4.72127	-4.07314	+		+	17647200	NA	2622060	NA	4	0	16	21	19	15	0	0	0	0	0	122380000	166020000	193350000	121810000	0	0
F1LPS8;P86252	Transcriptional activator protein Pur-alpha	Pura	3	3	3	27.3	31.903	0	85.227	338480000	41					Intracellular	0.8412	Intracellular	0.8328	0	0.1672	1.73054	0.000583026	-2.53874	-1.59335	+		+	8813430	6243000	1812650	NA	4	1	11	5	10	9	0	1	0	0	5	60354000	83462000	87354000	77357000	0	8956800
A0A0G2JUX5;Q68A21	Transcriptional activator protein Pur-beta	Purb	2	2	2	19.9	33.532	0	55.912	103120000	16					Intracellular	0.9343	Intracellular	0.8847	0	0.1153	1.56016	0.00407267	-1.36457	-1.07325	+		+	3034500	NA	665095	NA	4	0	5	2	4	3	0	2	0	0	0	28452000	10520000	25881000	36756000	0	1513700
Q2EJA0;A0A0G2K0Y6;R9PXS9	Transcriptional coactivator YAP1	Yap1	3	3	3	15.6	50.501	0	5.7368	36158000	7					Intracellular	0.5376	Intracellular	0.9363	0.0002	0.0635	0.64852	0.0745506	-0.890963	-0.61099				1058680	NA	195864	NA	4	0	1	2	2	2	0	0	0	0	0	12526000	6607700	11679000	5345000	0	0
P62997	Transformer-2 protein homolog beta	Tra2b	2	2	2	10.4	33.665	0	4.9217	57092000	8					Intracellular	0.9345	Intracellular	0.7657	0.0003	0.2341	1.95549	0.001209	-1.64694	-1.31253	+		+	1867200	NA	444428	NA	3	0	2	3	2	1	0	0	0	0	0	13938000	13265000	21837000	8052300	0	0
Q99PD6	Transforming growth factor beta-1-induced transcript 1 protein	Tgfb1i1	14	14	14	50.1	50.122	0	132.91	648530000	56					Intracellular	0.5656	Intracellular	0.9435	0.0002	0.0563	5.76883	0	-4.48443	-4.29236	+		+	18796500	NA	1714270	NA	4	0	12	11	13	18	0	1	0	0	1	132550000	153090000	186010000	174540000	0	0
P61589;Q5XIM3	Transforming protein RhoA	Rhoa	9	9	3	69.9	21.782	0	45.255	1578900000	49					UPS	0.5506	Intracellular	0.9657	0.0003	0.034	5.57377	0	-6.02354	-5.21632	+		+	45814000	NA	7391390	NA	4	0	10	12	11	13	0	1	1	0	1	381610000	399850000	427970000	354400000	0	6189900
P31232;A0A0G2JWK7	Transgelin	Tagln	23	23	23	87.6	22.603	0	319.83	42900000000	553					UPS	0.5702	Intracellular	0.7367	0.0016	0.2617	1.27438	0.00128115	-2.27936	-1.30322	+		+	896577000	275254000	96199600	178997000	4	4	95	108	109	100	0	61	30	1	49	10500000000	10500000000	9793400000	8080000000	0	1620100000
Q5XFX0;P37805;A0A0G2K6I5	Transgelin-2	Tagln2	17	17	17	86.4	22.393	0	323.31	12300000000	231					UPS	0.5611	Intracellular	0.8073	0.002	0.1907	2.15185	0.00029106	-2.76904	-1.85745	+		+	304050000	55891200	66173100	33127000	4	4	47	42	54	38	0	19	13	5	13	2560000000	2546500000	3943200000	2654800000	0	183560000
P46462	Transitional endoplasmic reticulum ATPase	Vcp	46	46	46	74.6	89.348	0	323.31	8579700000	314					Intracellular	0.7982	Intracellular	0.9414	0	0.0585	0.928108	0.00292422	-2.33408	-1.12226	+		+	214530000	79083300	6099860	53832600	4	4	60	61	68	67	0	17	14	1	26	1901200000	1820600000	2235800000	1827900000	0	231580000
G3V826	Transketolase	Tkt	25	1	1	55.7	71.158	0	11.519	106740000	9					Intracellular	0.5199	Intracellular	0.9997	0	0.0002	0.684595	0.0304774	-1.26708	-0.747416	+		+	3857300	NA	1730850	NA	3	0	3	3	0	2	0	0	1	0	0	44088000	18560000	0	31692000	0	0
P50137	Transketolase	Tkt	26	26	2	60.4	67.643	0	323.31	2956500000	146					Intracellular	0.5007	Intracellular	0.9272	0.0077	0.0652	0.557875	0.0288218	-1.65271	-0.75752	+		+	67721500	55777700	9321200	7401450	4	3	28	28	28	29	0	11	10	0	12	747810000	695870000	588270000	506280000	0	151750000
Q63186;A0A096MIS3	Translation initiation factor eIF-2B subunit delta	Eif2b4	3	3	3	8.6	57.809	0.0034195	2.5706	48165000	3					Intracellular	0.8763	Intracellular	0.9387	0	0.0613	0.43756	0.208778	-0.598541	-0.424191				1472730	NA	89823.5	NA	3	0	0	1	1	1	0	0	0	0	0	10083000	17887000	12280000	7915500	0	0
Q64350	Translation initiation factor eIF-2B subunit epsilon	Eif2b5	6	6	6	18.6	80.205	0	34.246	95893000	23					Intracellular	0.5476	Intracellular	0.4919	0.0677	0.4404	2.19502	0.000850615	-1.91069	-1.50874	+		+	2822700	NA	251934	NA	4	0	6	6	5	6	0	0	0	0	0	20462000	33182000	23266000	18983000	0	0
P70541	Translation initiation factor eIF-2B subunit gamma	Eif2b3	4	4	4	13.3	50.435	0	4.6638	49442000	5					Intracellular	0.5817	Intracellular	0.9253	0.031	0.0437	0.193094	0.455688	0.359333	0.234506				1752530	NA	463495	NA	3	0	3	1	1	0	0	0	0	0	0	20677000	4430700	20620000	3714700	0	0
P63029	Translationally-controlled tumor protein	Tpt1	5	5	5	48.3	19.462	0	16.971	674010000	33					UPS	0.614	Intracellular	0.9728	0.0001	0.0271	4.47241	0	-4.9774	-3.97294	+		+	18302200	NA	3316770	NA	4	0	6	8	9	4	0	3	2	1	0	105680000	150250000	235040000	137910000	0	26120000
Q9JHB5	Translin-associated protein X	Tsnax	3	3	3	16.6	33.005	0	42.108	137760000	22					UPS	0.5501	Intracellular	0.9733	0	0.0266	1.4596	0.00443205	-1.35752	-1.04478	+		+	3865200	2642200	507404	NA	4	1	3	4	7	6	0	2	0	0	0	27117000	16863000	31484000	54566000	0	7730500
Q4V7D1;A0A0G2K075;A0A0G2JX79;A0A0G2JXS8;Q7TPJ0	Translocon-associated protein subunit alpha	Ssr1	4	4	4	20.9	32.207	0	9.8159	757940000	21	+	+			Signal-peptide	0.9989	Signal-peptide	0	0.9989	0.0011	5.57581	0	-4.89779	-4.50074	+		+	22009500	NA	2753730	NA	4	0	4	11	4	2	0	0	0	0	0	209900000	239190000	246390000	62462000	0	0
Q07984	Translocon-associated protein subunit delta	Ssr4	4	4	4	30.6	18.979	0	10.692	1004900000	29	+	+			Signal-peptide	0.933	Signal-peptide	0.0008	0.933	0.0662	3.57798	0	-5.28087	-3.53929	+		+	28376500	NA	3480950	NA	4	0	6	10	8	5	0	0	0	0	0	286820000	271960000	306180000	139950000	0	0
Q66HG5	Transmembrane 9 superfamily member 2	Tm9sf2	9	9	9	14.8	75.585	0	32.027	326720000	24	+	+			Signal-peptide	0.9317	Signal-peptide	0.0035	0.9317	0.0648	4.16613	0	-3.6904	-3.128	+		+	9491470	NA	1616060	NA	4	0	3	6	9	6	0	0	0	0	0	80616000	73425000	121950000	50726000	0	0
Q5I0H4	Transmembrane and coiled-coil domains protein 1	Tmco1	2	2	2	12.2	21.175	0.00045106	4.6027	164590000	10		+			Transmembrane	0.9238	Transmembrane	0.0081	0.0681	0.9238	2.91053	0.000249721	-2.40226	-1.97003	+		+	4776220	NA	1607120	NA	4	0	4	2	2	2	0	0	0	0	0	30643000	50691000	58251000	25005000	0	0
Q63584	Transmembrane emp24 domain-containing protein 10	Tmed10	8	8	8	41.1	24.857	0	190.38	1949700000	50	+	+			Signal-peptide	0.7085	Signal-peptide	0.0126	0.7085	0.2789	3.41173	0	-6.60864	-3.8227	+		+	54411000	NA	7405350	NA	4	0	12	12	16	10	0	0	0	0	0	480560000	485690000	595820000	387600000	0	0
Q63524	Transmembrane emp24 domain-containing protein 2	Tmed2	4	4	4	30.8	22.733	0	15.27	689390000	25	+	+			Signal-peptide	0.9913	Signal-peptide	0.0003	0.9913	0.0084	3.63142	0	-4.53322	-3.28259	+		+	19685500	NA	4275080	NA	4	0	8	6	6	5	0	0	0	0	0	160210000	203230000	211120000	114840000	0	0
Q6AY25	Transmembrane emp24 domain-containing protein 3	Tmed3	5	5	5	33.9	25.51	0	17.99	315260000	19	+	+			Signal-peptide	0.9973	Signal-peptide	0	0.9973	0.0027	2.72395	8.55e-05	-3.75253	-2.48113	+		+	9359850	NA	2167260	NA	4	0	5	4	7	3	0	0	0	0	0	75464000	112240000	56435000	71122000	0	0
D3ZTX0	Transmembrane emp24 domain-containing protein 7	Tmed7	6	6	6	40.7	25.479	0	21.46	823310000	26	+	+			Signal-peptide	0.9655	Signal-peptide	0.0004	0.9655	0.034	4.15736	0	-5.88391	-4.17982	+		+	24126500	NA	4553770	NA	4	0	8	5	7	6	0	0	0	0	0	206600000	237950000	237720000	141040000	0	0
Q5I0E7	Transmembrane emp24 domain-containing protein 9	Tmed9	7	7	7	40	27.028	0	223.16	674710000	45	+	+			Signal-peptide	0.6011	Signal-peptide	0.0701	0.6011	0.3287	4.28084	0	-5.33986	-4.03112	+		+	19638500	NA	919246	NA	4	0	12	11	12	10	0	0	0	0	0	159790000	186740000	188550000	139620000	0	0
Q6AYA5;Q6TUE3	Transmembrane protein 106B	Tmem106b	4	4	4	25.1	31.152	0	10.426	59860000	8		+			UPS	0.5399	Intracellular	0.9502	0	0.0498	0.445076	0.252929	-0.496527	-0.381999				1745100	NA	263926	NA	3	0	2	1	3	2	0	0	0	0	0	13826000	18022000	22056000	5956500	0	0
Q4V899	Transmembrane protein 165	Tmem165	3	3	3	21.4	34.809	0	5.9772	54563000	9	+	+			Signal-peptide	0.9753	Signal-peptide	0.0005	0.9753	0.0242	0.908735	0.0314046	-1.01618	-0.743253	+		+	1747730	NA	207781	NA	3	0	2	3	3	1	0	0	0	0	0	9270200	15224000	18112000	11956000	0	0
Q5XIP9	Transmembrane protein 43	Tmem43	10	10	10	42.8	44.774	0	75.608	1069100000	62		+			Transmembrane	0.944	Transmembrane	0.0047	0.0513	0.944	5.89916	0	-6.08361	-5.45325	+		+	30819200	NA	1481550	NA	4	0	18	15	14	15	0	0	0	0	0	279290000	255280000	328350000	206160000	0	0
P32089	Tricarboxylate transport protein, mitochondrial	Slc25a1	6	6	6	35	33.835	0	76.188	416970000	22		+			Transmembrane	0.578	Transmembrane	0.4206	0.0015	0.578	2.70253	0.000222222	-3.22574	-2.27418	+		+	12281000	NA	4540870	NA	4	0	7	6	5	4	0	0	0	0	0	111100000	162920000	85605000	57355000	0	0
Q64428	Trifunctional enzyme subunit alpha, mitochondrial;Long-chain enoyl-CoA hydratase;Long chain 3-hydroxyacyl-CoA dehydrogenase	Hadha	32	32	32	59.8	82.664	0	221.52	3373200000	166					Intracellular	0.5034	Intracellular	0.9184	0.0009	0.0807	5.27146	0	-6.59457	-5.33026	+		+	99456300	NA	21651100	NA	4	0	38	40	38	50	0	0	0	0	0	831490000	941580000	667200000	932910000	0	0
Q60587;A0A0G2K330	Trifunctional enzyme subunit beta, mitochondrial;3-ketoacyl-CoA thiolase	Hadhb	17	17	17	54.9	51.414	0	88.396	1888100000	76					Intracellular	0.6755	Intracellular	0.7531	0.0184	0.2286	5.96082	0	-6.30629	-5.63368	+		+	56249500	NA	12821700	NA	4	0	18	15	21	22	0	0	0	0	0	471350000	523330000	365050000	528350000	0	0
Q91ZW6	Trimethyllysine dioxygenase, mitochondrial	Tmlhe	2	2	2	7.8	49.567	0	7.0812	25904000	7					Intracellular	0.5575	Intracellular	0.8343	0.0072	0.1585	0.32656	0.423774	0.302591	0.253459				844584	NA	204404	NA	3	0	2	1	0	4	0	0	0	0	0	5732600	6602700	5200800	8368300	0	0
P48500;A0A0G2JWJ4;A0A0G2JWU1	Triosephosphate isomerase	Tpi1	17	17	17	80.7	26.849	0	323.31	5250000000	144					UPS	0.5562	Intracellular	0.9969	0.0001	0.003	0.664819	0.0414082	-1.13436	-0.699749	+		+	128747000	72899500	50224200	42753300	4	4	18	20	33	16	0	14	22	7	14	1070400000	1089400000	1580000000	628180000	0	344270000
Q9EQV6;Q642E6	Tripeptidyl-peptidase 1	Tpp1	7	7	7	25.4	61.332	0	234.88	673660000	45	+			+	Signal-peptide	0.9468	Signal-peptide	0.0042	0.9468	0.049	2.24865	0.000214559	-3.78062	-2.22571	+		+	19638800	8412800	4299650	NA	4	1	10	8	7	13	0	1	0	6	0	160730000	150040000	121840000	200230000	0	1042200
Q64560	Tripeptidyl-peptidase 2	Tpp2	15	15	15	18.9	138.29	0	63.766	414300000	51					UPS	0.5212	Intracellular	0.9252	0.0366	0.0382	2.69532	0.000214013	-3.10894	-2.22386	+		+	11407200	3983700	1982370	NA	4	1	10	12	14	14	0	0	1	0	0	100520000	101210000	89987000	117210000	0	1424100
Q6AYT3	tRNA-splicing ligase RtcB homolog	Rtcb	12	12	12	45.7	55.249	0	71.763	858810000	50					Intracellular	0.5648	Intracellular	0.9577	0	0.0423	7.68449	0	-4.72776	-5.12234	+		+	25172000	NA	1164310	NA	4	0	14	11	10	15	0	0	0	0	0	235980000	170340000	257190000	195310000	0	0
A0A0G2JX64;Q63607;Q91XN6;A0A0G2K7F7;P04692;A0A0G2JSQ4	Tropomyosin alpha-1 chain	Tpm1	26	19	5	65.1	32.708	0	323.31	9974200000	93					UPS	0.5312	Intracellular	0.9967	0	0.0033	1.09836	0.000843206	-4.04914	-1.48756	+		+	268762000	59732000	74964300	9884200	4	3	18	19	22	20	0	4	4	0	6	2249500000	3087400000	2791600000	1451900000	0	91707000
Q63610	Tropomyosin alpha-3 chain	Tpm3	24	15	11	62.1	29.006	0	71.81	3018700000	49					Intracellular	0.9345	Intracellular	0.9132	0	0.0867	1.88586	0.000199762	-4.2327	-2.10237	+		+	84039000	17785500	14966800	9345840	4	2	9	10	13	15	0	1	0	0	1	557220000	875780000	883660000	589310000	8210100	30494000
P09495;A0A0G2K2G8	Tropomyosin alpha-4 chain	Tpm4	27	27	17	71.8	28.509	0	323.31	17300000000	233					Intracellular	0.7986	Intracellular	0.948	0	0.052	1.35877	0.000903004	-2.76577	-1.46595	+		+	460317000	112707000	87434200	87470400	4	4	46	45	43	42	0	16	18	0	23	3432300000	4966600000	4511400000	3166900000	0	342270000
Q6P7B0;F8WFH8;A0A0G2K673	Tryptophan--tRNA ligase, cytoplasmic;T1-TrpRS;T2-TrpRS	Wars	16	16	16	47.4	54.143	0	77.914	926040000	92					UPS	0.5006	Intracellular	0.9575	0.0005	0.042	2.58204	9.03e-05	-4.34455	-2.5854	+		+	25024500	3617950	4094360	2479890	4	2	19	24	17	28	0	1	1	0	2	214460000	208690000	246390000	239780000	0	8898100
P68370;Q68FR8;F1LUM5	Tubulin alpha-1A chain;Tubulin alpha-3 chain	Tuba1a;Tuba3a	28	28	1	82.7	50.135	0	323.31	39300000000	641					Intracellular	0.5655	Intracellular	0.8927	0.0107	0.0966	2.53242	0.00015427	-3.61187	-2.33162	+		+	1032430000	110583000	129808000	65371400	4	4	134	134	160	135	0	24	26	8	20	8976300000	8148200000	11700000000	9169500000	786880	438560000
Q6P9V9	Tubulin alpha-1B chain	Tuba1b	28	3	0	82.7	50.151	0	82.997	2664900000	33					Intracellular	0.5655	Intracellular	0.8927	0.0107	0.0966	3.36562	0	-5.94953	-3.59998	+		+	66343500	NA	46375200	NA	4	0	8	3	15	7	0	0	0	0	0	385780000	230250000	1179900000	861150000	0	0
Q6AYZ1;A0A0H2UHM7	Tubulin alpha-1C chain	Tuba1c	27	2	2	76.6	49.937	0	14.264	400260000	22					Intracellular	0.5676	Intracellular	0.8927	0.0107	0.0966	7.00586	0	-3.80097	-4.09398	+		+	11061500	NA	1231170	NA	4	0	4	2	7	4	0	2	1	0	2	89410000	96940000	91900000	107770000	0	4600700
P85108	Tubulin beta-2A chain	Tubb2a	28	8	3	79.6	49.906	0	39.808	1644900000	67					Intracellular	0.6728	Intracellular	0.9336	0.0001	0.0663	1.25522	0.000866724	-3.08905	-1.46839	+		+	35389800	11326700	14000800	9545550	4	3	17	12	22	14	0	0	0	0	2	424530000	317680000	665160000	211500000	0	6882400
G3V7C6;Q6P9T8	Tubulin beta-4B chain	Tubb4b	30	30	1	78.1	61.186	0	323.31	37200000000	641					Intracellular	0.5407	Intracellular	0.9481	0.0006	0.0513	2.70037	8.99e-05	-4.05897	-2.57071	+		+	932645000	73552700	165118000	42231500	4	4	147	130	153	147	0	19	19	3	23	8736400000	8243600000	11700000000	7434300000	984110	362600000
P69897	Tubulin beta-5 chain	Tubb5	28	6	5	78.8	49.67	0	125.1	8546300000	276					Intracellular	0.5787	Intracellular	0.9385	0.0012	0.0604	1.70473	0.000189831	-4.47226	-2.01602	+		+	196102000	22724700	64797600	8124960	4	3	45	61	74	69	0	7	7	0	13	2095500000	1484700000	2685100000	2135900000	0	32619000
F1LUW9;P83888	Tubulin gamma chain;Tubulin gamma-1 chain	Tubg2;Tubg1	4	4	4	15.1	53.771	0	12.99	42825000	17					Intracellular	0.614	Intracellular	0.9621	0.0004	0.0375	0.39051	0.233153	-0.583774	-0.401304				1270600	NA	146763	NA	4	0	5	5	2	5	0	0	0	0	0	9056700	16181000	7667400	9919200	0	0
Q6PCT3	Tumor protein D54	Tpd52l2	5	5	5	35.5	23.992	0	43.513	198210000	19					Intracellular	0.6311	Intracellular	0.965	0	0.0349	2.21692	0.000337688	-2.53276	-1.7943	+		+	5851180	NA	1070490	NA	4	0	6	2	7	4	0	0	0	0	0	42700000	50251000	53361000	51900000	0	0
Q6IRE4	Tumor susceptibility gene 101 protein	Tsg101	2	2	2	7.2	44.077	0.0004207	3.6006	44655000	3					Intracellular	0.584	Intracellular	0.9612	0	0.0388	1.42578	0.00514083	-1.33712	-1.02646	+		+	1353730	NA	67007.3	NA	3	0	1	1	0	1	0	0	0	0	0	10865000	11367000	11353000	11070000	0	0
Q5RJR2	Twinfilin-1	Twf1	8	8	8	36.9	40.09	0	65.374	790820000	27					Intracellular	0.5338	Intracellular	0.8225	0.0001	0.1774	1.16557	0.00324834	-1.76428	-1.10605	+		+	20455500	10082300	5142830	1232840	4	3	2	3	9	12	0	0	1	0	0	146970000	184270000	205800000	166220000	0	18997000
Q4V888;Q5PPM8	Type 2 phosphatidylinositol 4,5-bisphosphate 4-phosphatase	Tmem55a	5	5	5	38.5	28.024	0	14.107	250840000	24		+			UPS	0.53	Intracellular	0.9455	0	0.0544	3.50929	0.000151762	-2.70372	-2.32144	+		+	7358920	NA	815136	NA	4	0	5	5	7	7	0	0	0	0	0	55765000	66457000	75259000	53355000	0	0
P41499	Tyrosine-protein phosphatase non-receptor type 11	Ptpn11	5	5	5	14.4	68.458	0	10.921	86051000	17					Intracellular	0.5832	Intracellular	0.9786	0	0.0214	4.57128	0.000290155	-1.77124	-1.8549	+		+	2526050	NA	269851	NA	4	0	3	5	5	4	0	0	0	0	0	18279000	16441000	28759000	22572000	0	0
A0A0G2K6A2;Q641Z2	Tyrosine-protein phosphatase non-receptor type 9	Ptpn9	5	5	5	15.4	61.986	0	9.6471	45453000	13					Intracellular	0.5482	Intracellular	0.9787	0.0002	0.0212	0.706287	0.238493	-0.435946	-0.396242				1349000	NA	230930	NA	4	0	3	5	3	2	0	0	0	0	0	13153000	12754000	9354600	10192000	0	0
A0A0H2UHG0;Q4KM49	Tyrosine--tRNA ligase, cytoplasmic;Tyrosine--tRNA ligase, cytoplasmic, N-terminally processed	Yars	14	14	14	37.2	63.025	0	69.072	694960000	54					Intracellular	0.5026	Intracellular	0.9084	0	0.0916	3.66008	0	-4.22485	-3.16457	+		+	20094500	1762600	9389520	NA	4	1	11	13	12	18	0	0	0	0	0	169680000	125300000	207200000	185870000	0	3251000
M3ZCQ2;F1LNJ2	U5 small nuclear ribonucleoprotein 200 kDa helicase	Snrnp200	13	13	13	11	244.53	0	59.318	239630000	41					Intracellular	0.5827	Intracellular	0.9977	0.0001	0.0022	4.28122	0.000108738	-3.19199	-2.86643	+		+	6977370	NA	705241	NA	4	0	10	9	15	7	0	0	0	0	0	46281000	58348000	74874000	58290000	0	0
A0A0G2JVV5;Q5U2N2	Ubiquitin carboxyl-terminal hydrolase	Usp14	8	8	8	27.9	52.293	0	36.027	223110000	29					UPS	0.5236	Intracellular	0.9216	0.0002	0.0782	1.80398	0.000585185	-2.46638	-1.60207	+		+	5685070	3695400	1846930	NA	4	1	4	3	8	9	0	1	1	0	3	59544000	16460000	75600000	58808000	0	5127700
D3ZVQ0	Ubiquitin carboxyl-terminal hydrolase	Usp5	19	19	19	41.1	95.778	0	170.79	635220000	88					Intracellular	0.5657	Intracellular	0.9074	0.0049	0.0876	2.41856	0.000246968	-2.7026	-1.94221	+		+	17277000	3979700	2398740	965816	4	3	22	19	16	24	0	2	2	1	2	137210000	148050000	157710000	164590000	0	9782600
A0A0G2K2C7;D3ZC84;A0A1B0GWT2	Ubiquitin carboxyl-terminal hydrolase	Usp9x	19	19	14	11.7	290.22	0	29.94	285810000	39					Intracellular	0.6525	Intracellular	0.7029	0.0003	0.2969	3.42886	8.37e-05	-2.96699	-2.44403	+		+	7931820	NA	331077	NA	4	0	11	8	13	6	0	0	1	0	0	73167000	48852000	78976000	67839000	0	0
Q00981	Ubiquitin carboxyl-terminal hydrolase isozyme L1	Uchl1	4	4	4	43.5	24.838	0	20.696	303720000	17					UPS	0.6154	Intracellular	0.6771	0.2266	0.0963	1.08945	0.00295704	-1.922	-1.11823	+		+	8903700	5881650	3839780	265518	4	2	3	4	5	2	0	2	1	0	0	64730000	62948000	97397000	24137000	0	18357000
A0A0G2K1U1;A0A0A0MY07;Q9R085	Ubiquitin carboxyl-terminal hydrolase;Ubiquitin carboxyl-terminal hydrolase 15	Usp15	3	3	3	7.1	91.028	0	5.559	350310000	15					Intracellular	0.6787	Intracellular	0.953	0	0.047	3.27558	9.91e-05	-3.7322	-2.75275	+		+	10087400	NA	2868230	NA	4	0	3	2	3	7	0	0	0	0	0	59800000	42594000	172980000	74942000	0	0
F1LM09;Q4VSI4	Ubiquitin carboxyl-terminal hydrolase;Ubiquitin carboxyl-terminal hydrolase 7	Usp7	6	6	6	8.7	128.43	0	9.5106	48346000	9					Intracellular	0.5663	Intracellular	0.8795	0.0001	0.1204	0.0244011	0.906202	-0.0539021	-0.0346765				1498600	NA	251569	NA	3	0	0	1	3	5	0	0	0	0	0	10467000	7266800	12020000	18593000	0	0
Q9ES53	Ubiquitin fusion degradation protein 1 homolog	Ufd1l	4	4	4	17.3	34.485	0	7.8452	74224000	15					UPS	0.551	Intracellular	0.7298	0.0055	0.2647	2.80317	0.000299786	-2.32992	-1.89923	+		+	2493430	NA	160331	NA	3	0	3	5	0	6	0	1	0	0	0	19337000	21141000	12894000	20851000	0	0
B2RYG6	Ubiquitin thioesterase OTUB1	Otub1	6	6	6	35.4	31.27	0	50.47	463500000	40					UPS	0.614	Intracellular	0.9996	0	0.0004	0.562752	0.0360893	-1.4397	-0.721623	+		+	9895150	8370370	633658	1111260	4	3	8	5	9	10	0	3	2	0	3	103840000	100470000	132670000	79842000	0	18347000
P62982;F1LU69;F1LML2;P62986;P0CG51;Q63429;F1M927	Ubiquitin-40S ribosomal protein S27a;Ubiquitin;40S ribosomal protein S27a;Ubiquitin-60S ribosomal protein L40;Ubiquitin;60S ribosomal protein L40;Polyubiquitin-B;Ubiquitin;Polyubiquitin-C;Ubiquitin;Ubiquitin-related	Rps27a;Rps27l3;Ubc;Uba52;Ubb	6	6	6	42.3	17.951	0	46.714	5778900000	49					UPS	0.5482	Intracellular	0.8993	0.0002	0.1006	4.51215	0	-3.59379	-3.20362	+		+	164415000	14330800	23630000	5034390	4	4	10	8	15	11	0	1	0	3	1	1503300000	1302500000	1771700000	944350000	0	94867000
Q9EQX9	Ubiquitin-conjugating enzyme E2 N	Ube2n	3	3	3	40.8	17.124	0	10.992	98545000	18					Intracellular	0.5099	Intracellular	0.9697	0.0001	0.0302	3.19412	0.000582488	-1.68985	-1.59327	+		+	2895550	NA	119252	NA	4	0	5	5	5	3	0	0	0	0	0	25289000	26677000	27575000	19003000	0	0
Q5U300;A0A0G2K8A5	Ubiquitin-like modifier-activating enzyme 1	Uba1	31	31	31	47.8	117.79	0	323.31	2586500000	146					Intracellular	0.5239	Intracellular	0.8547	0	0.1452	1.63414	0.000345324	-3.78553	-1.84567	+		+	71652500	12247000	10971400	1024860	4	3	33	41	34	27	0	4	3	0	4	604000000	601500000	708670000	583890000	0	22909000
Q5HZY0	UBX domain-containing protein 4	Ubxn4	2	2	2	7.9	56.393	0	10.206	70500000	5					Intracellular	0.8797	Intracellular	0.7504	0.1056	0.1441	0.639389	0.0728653	-0.907928	-0.614033				2509870	NA	86274.8	NA	3	0	1	4	0	0	0	0	0	0	0	17953000	22713000	24907000	4927900	0	0
G3V6C4;O70199	UDP-glucose 6-dehydrogenase	Ugdh	7	7	7	25.4	54.886	0	32.857	124280000	17					Intracellular	0.5644	Intracellular	0.8253	0.0002	0.1745	2.87934	0.000584104	-1.77914	-1.59571	+		+	3695400	NA	710385	NA	4	0	4	3	2	8	0	0	0	0	0	26690000	24811000	31186000	41597000	0	0
Q9JLA3	UDP-glucose:glycoprotein glucosyltransferase 1	Uggt1	35	35	35	42.3	176.43	0	167.45	1421600000	137	+			+	Transmembrane	0.5008	Transmembrane	0.0004	0.4989	0.5008	5.09159	0	-4.89746	-4.2643	+		+	41429200	1562620	13558700	530511	4	3	32	25	41	34	0	2	1	0	2	273920000	317910000	466890000	346320000	0	1825400
A0A0G2JTN5;A0A0G2JSJ2;Q4KM73	UMP-CMP kinase	Cmpk1	3	3	3	14.2	27.065	0	5.4163	61759000	7	+			+	UPS	0.571	Intracellular	0.4686	0.1088	0.4226	0.798152	0.05455	-0.888708	-0.656841				2037570	NA	551382	NA	3	0	1	2	3	1	0	0	0	0	0	14564000	12711000	26492000	6805800	0	1185800
Q05096	Unconventional myosin-Ib	Myo1b	13	13	13	20.2	131.92	0	91.581	313590000	34					Intracellular	0.5493	Intracellular	0.9593	0	0.0407	4.53959	0	-3.42464	-3.10399	+		+	9009300	NA	3312040	NA	4	0	5	4	15	10	0	0	0	0	0	32445000	33034000	153880000	94237000	0	0
Q63355	Unconventional myosin-Ic	Myo1c	48	48	48	56.5	119.81	0	323.31	6540000000	326					Intracellular	0.8798	Intracellular	0.816	0.0067	0.1774	1.90587	0.000188976	-3.70139	-2.00119	+		+	177013000	22628800	15814300	18782900	4	4	74	75	73	65	0	12	15	0	12	1509300000	1589200000	1660000000	1578300000	0	56163000
Q63357;A0A0G2K6E3	Unconventional myosin-Id	Myo1d	16	16	16	21.5	116.09	0	24.359	359830000	41					Intracellular	0.5697	Intracellular	0.9756	0.0003	0.0241	3.57668	0	-4.39531	-3.1935	+		+	10390600	NA	2629250	NA	4	0	8	3	18	12	0	0	0	0	0	53261000	48540000	168040000	89519000	0	0
Q63356;A0A0G2K9E8;D4A7X9	Unconventional myosin-Ie	Myo1e	7	7	7	10.5	126.83	0	13.869	127380000	20					Intracellular	0.5688	Intracellular	0.7952	0.0017	0.2031	3.40802	0.000211854	-2.55584	-2.20375	+		+	3794020	NA	969265	NA	4	0	4	5	6	5	0	0	0	0	0	51554000	42537000	16753000	16539000	0	0
A0A0G2K9S4;A0A0G2K9X3;A0A0G2K4Y7;Q9QYF3	Unconventional myosin-Va	Myo5a	2	2	2	1.5	203.07	0.00040519	3.1698	135360000	3					Intracellular	0.5696	Intracellular	0.9716	0.0001	0.0284	2.49548	0.000580882	-1.91697	-1.59147	+		+	4353630	NA	541154	NA	3	0	2	1	0	0	0	0	0	0	0	35395000	38747000	39074000	22142000	0	0
Q9JJW3	Up-regulated during skeletal muscle growth protein 5	Usmg5	2	2	2	43.1	6.4075	0	5.5174	160590000	9		+			Transmembrane	0.8919	Transmembrane	0.1072	0.0009	0.8919	2.33657	0.000337011	-2.41812	-1.79047	+		+	4762970	NA	1300460	NA	4	0	2	4	2	1	0	0	0	0	0	46527000	51379000	30651000	32029000	0	0
Q4KMA2	UV excision repair protein RAD23 homolog B	Rad23b	7	7	6	36.1	43.496	0	49.871	311780000	42					Intracellular	0.5204	Intracellular	0.9349	0.0001	0.065	4.66435	0	-3.36419	-3.10496	+		+	9095850	NA	1047090	NA	4	0	9	12	12	9	0	0	0	0	0	62393000	72427000	95409000	81549000	0	0
A0A0G2JXT0;Q6AY86	Vacuolar protein sorting-associated protein 26A	Vps26a	5	5	5	31.1	34.579	0	33.983	106170000	20					UPS	0.5574	Intracellular	0.9413	0.0084	0.0503	2.73748	0.000346035	-2.27224	-1.84923	+		+	3160100	NA	655394	NA	4	0	7	2	7	4	0	0	0	0	0	29732000	19840000	25004000	31596000	0	0
A0A0G2JTS3;B2RZ78	Vacuolar protein sorting-associated protein 29	Vps29	4	4	4	28.2	23.602	0	8.9646	290530000	12					UPS	0.6176	Intracellular	0.9778	0.0075	0.0147	3.00305	0.000152797	-3.04807	-2.32528	+		+	8500730	NA	1491040	NA	4	0	4	2	3	3	0	0	0	0	0	77300000	81191000	86872000	45165000	0	0
Q63615;A0A0G2KAN2;A0A0G2K5N1	Vacuolar protein sorting-associated protein 33A	Vps33a	2	2	2	8.5	67.513	0	6.4537	19694000	8					Intracellular	0.5679	Intracellular	0.8832	0.0001	0.1167	0.172952	0.580426	0.217033	0.16863				683124	NA	170972	NA	3	0	3	1	2	2	0	0	0	0	0	2229800	7274700	4869200	5320100	0	0
O08700	Vacuolar protein sorting-associated protein 45	Vps45	3	3	3	6.5	64.893	0	5.8707	39829000	8					Intracellular	0.5855	Intracellular	0.9125	0.0002	0.0873	2.00926	0.0158848	-0.891881	-0.858072	+		+	1189270	NA	290402	NA	4	0	2	3	1	2	0	0	0	0	0	10783000	10430000	7244900	11371000	0	0
Q04462;A0A0G2JVG2	Valine--tRNA ligase	Vars	32	32	32	44.3	140.37	0	323.31	2767300000	175					Intracellular	0.5485	Intracellular	0.7304	0.0501	0.2196	2.86804	0	-5.19491	-3.01281	+		+	80143700	4345130	14332900	2534440	4	3	35	36	54	45	0	1	1	0	3	590010000	650300000	863010000	605930000	0	15487000
Q5M9H2;P45953	Very long-chain specific acyl-CoA dehydrogenase, mitochondrial	Acadvl	12	12	12	32.8	70.821	0	75.041	584350000	35					Intracellular	0.5666	Intracellular	0.9559	0.0003	0.0438	4.10556	0	-4.23087	-3.3949	+		+	17327500	NA	5991390	NA	4	0	13	7	5	10	0	0	0	0	0	162400000	154260000	82296000	185390000	0	0
Q6P7R8;D3ZPU3	Very-long-chain 3-oxoacyl-CoA reductase	Hsd17b12	7	7	7	34.6	34.84	0	90.446	427290000	34		+			Transmembrane	0.4548	Transmembrane	0.4255	0.1198	0.4548	3.18846	0.00011002	-4.18549	-2.89237	+		+	12380500	NA	2482740	NA	4	0	7	12	9	6	0	0	0	0	0	91790000	88401000	173150000	73955000	0	0
Q64232	Very-long-chain enoyl-CoA reductase	Tecr	4	4	4	14.9	36.122	0	6.3955	161650000	17		+			UPS	0.5727	Intracellular	0.8481	0	0.1519	1.69925	0.000585728	-2.64376	-1.61096	+		+	4497800	NA	1458940	NA	4	0	3	6	5	3	0	0	0	0	0	49365000	53444000	37461000	21381000	0	0
P63045	Vesicle-associated membrane protein 2	Vamp2	5	3	3	60.3	12.691	0	39.977	96196000	18		+			UPS	0.54	Intracellular	0.8953	0	0.1046	2.09648	0.00261677	-1.28465	-1.13725	+		+	2849950	NA	573935	NA	4	0	4	4	4	6	0	0	0	0	0	30382000	28929000	19338000	17548000	0	0
P63025	Vesicle-associated membrane protein 3	Vamp3	6	6	4	55.3	11.48	0	45.286	637030000	18		+			UPS	0.5501	Intracellular	0.9969	0	0.0031	4.42692	0	-3.99784	-3.41579	+		+	18772500	NA	5197960	NA	4	0	5	7	2	4	0	0	0	0	0	167720000	237780000	134490000	97048000	0	0
Q9JHW5	Vesicle-associated membrane protein 7	Vamp7	4	4	4	24.1	24.775	0	6.95	55276000	10		+			UPS	0.5521	Intracellular	0.8266	0.0902	0.0831	0.0977783	0.742296	0.128447	0.100266				1570800	NA	237515	NA	4	0	3	1	5	1	0	0	0	0	0	16562000	14640000	17408000	6665600	0	0
Q9Z270;A0A0G2K8E6	Vesicle-associated membrane protein-associated protein A	Vapa	10	10	9	58.6	27.841	0	32.174	1204800000	40		+			UPS	0.5528	Intracellular	0.9553	0	0.0447	4.58431	0	-5.13204	-4.11724	+		+	35027200	NA	8489050	NA	4	0	13	8	11	8	0	0	0	0	0	282610000	369130000	338790000	204920000	0	0
Q9Z269	Vesicle-associated membrane protein-associated protein B	Vapb	7	6	6	34.6	26.916	0	21.026	620160000	25		+			UPS	0.5507	Intracellular	0.9806	0.0001	0.0194	5.5575	0	-4.98944	-4.55357	+		+	18323200	NA	4617080	NA	4	0	9	7	3	6	0	0	0	0	0	173080000	231710000	118500000	96869000	0	0
A0A0G2K6U1;F1LQ81;Q9QUL6	Vesicle-fusing ATPase	Nsf	11	11	11	19.9	82.643	0	21.992	378710000	46					Intracellular	0.5612	Intracellular	0.8686	0.0016	0.1298	5.06382	0.00010728	-2.8739	-2.85465	+		+	11203400	NA	1150950	NA	4	0	11	9	13	13	0	0	0	0	0	98824000	98568000	91736000	89584000	0	0
Q4KM74	Vesicle-trafficking protein SEC22b	Sec22b	10	10	10	52.1	24.74	0	323.31	983540000	53		+			UPS	0.5508	Intracellular	0.848	0.064	0.088	2.35761	0.000157969	-4.09084	-2.3757	+		+	26504500	7970100	10406700	NA	4	1	14	13	12	13	0	1	0	0	0	236810000	289980000	268450000	180350000	0	6583300
Q3KRF2;Q9Z1A6;Q6P513	Vigilin	Hdlbp	41	41	41	48.2	141.69	0	323.31	4381800000	209					Intracellular	0.7319	Intracellular	0.9393	0.0001	0.0606	5.07793	0	-7.3719	-5.55373	+		+	124830000	NA	16449900	NA	4	0	45	49	62	53	0	0	0	0	0	917230000	994560000	1400800000	1017200000	0	19601000
G3V8C3;P31000;F1M7P4;P21807;CON__Q9H552;G3V8Q2;G3V7S2;F1LRZ7;P23565;P19527;P12839;P16884	Vimentin	Vim	64	64	58	86.3	53.7	0	323.31	519000000000	3121					Intracellular	0.9188	Intracellular	0.7042	0.002	0.2938	2.07233	8.93e-05	-6.0871	-2.5562	+		+	13985600000	415967000	6280690000	289816000	4	4	846	895	457	736	1	68	50	4	64	168000000000	190000000000	60800000000	96800000000	9517400	1719600000
R9PXU6;A0A0G2K8V2;P85972	Vinculin	Vcl	65	65	65	64.1	116.57	0	323.31	34600000000	738					Intracellular	0.5889	Intracellular	0.937	0.0001	0.0629	0.511878	0.093278	-0.950005	-0.574929				771010000	536205000	206233000	318140000	4	4	135	134	117	106	0	103	59	13	71	8623800000	8533500000	6191700000	4525500000	0	2576200000
Q6TEK4	Vitamin K epoxide reductase complex subunit 1	Vkorc1	2	2	2	19.3	17.783	0	48.176	172280000	9		+			Transmembrane	0.6516	Transmembrane	0.0093	0.3391	0.6516	4.16693	0.00015074	-2.42412	-2.31001	+		+	5067280	NA	477627	NA	4	0	3	3	1	2	0	0	0	0	0	45855000	50694000	44833000	30903000	0	0
O88496;B5DEF3;A0A0G2K0A3	Vitamin K-dependent gamma-carboxylase	Ggcx	4	4	4	7.9	87.478	0	9.9264	50486000	16		+			Intracellular	0.7008	Intracellular	0.5192	0.0348	0.4459	0.562568	0.120765	-0.763114	-0.532296				1498950	NA	257419	NA	4	0	4	6	4	2	0	0	0	0	0	11193000	12771000	11739000	14783000	0	0
Q9Z2L0	Voltage-dependent anion-selective channel protein 1	Vdac1	15	15	15	74.6	30.755	0	248.22	4601800000	106		+			UPS	0.6224	Intracellular	0.9045	0.0001	0.0954	5.01043	0	-7.85884	-5.70564	+		+	135546000	NA	90891100	NA	4	0	34	28	23	21	0	0	0	0	0	2250000000	1064900000	708660000	573450000	1895300	0
P81155	Voltage-dependent anion-selective channel protein 2	Vdac2	12	12	12	56.6	31.745	0	165.37	2106500000	46		+			UPS	0.6036	Intracellular	0.9159	0.0024	0.0818	4.81293	0	-6.14836	-4.77205	+		+	62206800	NA	36532300	NA	4	0	19	10	8	9	0	0	0	0	0	945660000	505320000	461460000	194020000	0	0
A0A0G2JSR0;Q9R1Z0	Voltage-dependent anion-selective channel protein 3	Vdac3	11	11	11	51.6	30.783	0	49.516	1305100000	40		+			UPS	0.6224	Intracellular	0.7894	0.0003	0.2103	4.71675	0	-6.19365	-4.72381	+		+	38671200	NA	25086900	NA	4	0	20	7	9	4	0	0	0	0	0	641020000	255370000	267780000	140970000	0	0
A0A0G2K7E5;Q9ERS3;D3ZKP9;A0A0G2K8L7;P54290	Voltage-dependent calcium channel subunit alpha-2/delta-1;Voltage-dependent calcium channel subunit alpha-2-1;Voltage-dependent calcium channel subunit delta-1	Cacna2d1	5	5	5	9.9	122.73	0	18.281	74704000	17	+	+			Signal-peptide	0.8813	Signal-peptide	0.0355	0.8813	0.0832	1.02926	0.0038833	-1.88792	-1.08013	+		+	2616800	NA	724647	NA	3	0	8	5	2	2	0	0	0	0	0	23724000	32029000	8269800	10681000	0	0
G3V887;Q6P735	V-type proton ATPase subunit a	Tcirg1	5	5	5	13.3	93.209	0	64.955	91669000	17		+			Intracellular	0.5578	Intracellular	0.9383	0.0327	0.029	1.67342	0.00108678	-1.86864	-1.33144	+		+	2723100	NA	538872	NA	4	0	5	8	2	2	0	0	0	0	0	27698000	34697000	13774000	15500000	0	0
Q2I6B2;Q2I6B5;P25286	V-type proton ATPase subunit a;V-type proton ATPase 116 kDa subunit a isoform 1	Atp6v0a1	5	5	5	10.2	95.584	0	14.394	83399000	16		+			Intracellular	0.5457	Intracellular	0.9001	0.0002	0.0997	2.43376	0.000363636	-2.15647	-1.69992	+		+	2395870	NA	549119	NA	4	0	3	4	5	4	0	0	0	0	0	11971000	24451000	35981000	10996000	0	0
P62815;D3ZZS8	V-type proton ATPase subunit B, brain isoform	Atp6v1b2	16	16	16	49.3	56.55	0	37.618	769460000	65					Intracellular	0.5694	Intracellular	0.9362	0.0003	0.0635	4.1328	0	-4.2132	-3.39913	+		+	22261300	NA	3756700	NA	4	0	12	15	22	16	0	0	0	0	0	164190000	187390000	273140000	142170000	1355500	0
Q5FVI6	V-type proton ATPase subunit C 1	Atp6v1c1	4	4	4	19.9	43.9	0	6.0269	62025000	7					UPS	0.5238	Intracellular	0.9144	0.0434	0.0423	0.889199	0.0200818	-1.22224	-0.817647	+		+	2064230	NA	520457	NA	3	0	0	1	5	1	0	0	0	0	0	14813000	14885000	24579000	7748600	0	0
G3V7L8;Q6PCU2	V-type proton ATPase subunit E 1	Atp6v1e1	4	4	4	23.9	26.143	0	9.8636	139270000	11					UPS	0.5287	Intracellular	0.918	0	0.082	2.66847	0.00030303	-2.42605	-1.90665	+		+	4066200	NA	1076420	NA	4	0	4	1	5	1	0	0	0	0	0	24522000	25005000	53115000	36632000	0	0
B2RYF7;A0A0G2K6R7	WAS protein family homolog 1	Wash1	6	6	6	24.2	51.326	0	36.701	64541000	17					Intracellular	0.7298	Intracellular	0.929	0.0002	0.0708	2.97265	0.000336	-2.05034	-1.78561	+		+	1910350	NA	254466	NA	4	0	7	6	2	2	0	0	0	0	0	19208000	23957000	11430000	9946800	0	0
F1LPG9;Q80X08;A0A0U1RRY6;A0A0U1RS11	WASH complex subunit FAM21	Fam21c;Fam21	9	9	9	16.7	145.06	0	42.75	159770000	29					Intracellular	0.6605	Intracellular	0.9155	0.0003	0.0842	2.90884	0.000150538	-3.08886	-2.30568	+		+	4754550	NA	933708	NA	4	0	7	5	7	10	0	0	0	0	0	42136000	33129000	36837000	47668000	0	0
Q5RKI0	WD repeat-containing protein 1	Wdr1	22	22	22	65	66.181	0	192.74	4630000000	156					UPS	0.5215	Intracellular	0.9593	0	0.0407	1.53134	0.00759441	-1.18376	-0.973273	+		+	111603000	54121700	9689610	22644400	4	4	25	28	31	32	0	14	13	0	13	787630000	1140000000	1226700000	931700000	1270500	158330000
Q4V7A0;A0A0G2K648	WD repeat-containing protein 61;WD repeat-containing protein 61, N-terminally processed	Wdr61	4	4	4	22	33.746	0	5.7119	66043000	10					UPS	0.6368	Intracellular	0.8282	0	0.1717	0.922787	0.0962801	-0.664506	-0.569836				1953420	NA	405578	NA	4	0	1	1	3	5	0	0	0	0	0	16179000	12654000	18500000	18710000	0	0
G3V702;Q99M63	WD40 repeat-containing protein SMU1;WD40 repeat-containing protein SMU1, N-terminally processed	Smu1	3	3	3	8.6	57.543	0	6.6298	39565000	12					Intracellular	0.5452	Intracellular	0.9941	0.0004	0.0055	0.0464963	0.869736	0.0620689	0.0490139				1380200	NA	784409	NA	3	0	2	1	4	5	0	0	0	0	0	4461300	15871000	8089100	11145000	0	0
A0A0G2JV31;O54975	Xaa-Pro aminopeptidase 1;Xaa-Pro aminopeptidase 1, N-terminally processed	Xpnpep1	15	15	15	37.8	74.667	0	76.356	594590000	75					Intracellular	0.5474	Intracellular	0.9608	0	0.0392	0.668834	0.0155302	-1.83203	-0.864353	+		+	13616700	9386760	2785540	1497650	4	3	11	12	24	17	0	2	6	0	3	105420000	97955000	144520000	193270000	0	15053000
Q5I0D7	Xaa-Pro dipeptidase	Pepd	4	4	4	11.2	54.75	0	27.381	115080000	31					Intracellular	0.567	Intracellular	0.9256	0.0187	0.0557	0.912619	0.147839	-0.546622	-0.495123				2688180	2225770	368565	294476	4	3	5	7	6	5	0	2	3	0	3	17693000	26055000	24941000	29460000	0	4326700
Q62764;D4A0L4;F1MA18	Y-box-binding protein 3	Ybx3	5	4	4	31	38.851	0	122.73	123600000	17					Intracellular	0.9344	Intracellular	0.945	0.0068	0.0481	4.64039	0.000206897	-2.12062	-2.16299	+		+	3556300	NA	338607	NA	4	0	3	4	7	3	0	0	0	0	0	18991000	31413000	54208000	18988000	0	0
Q5BJM8	Zinc transporter 7	Slc30a7	3	3	3	10.8	41.773	0	11.181	83799000	12		+			Transmembrane	0.9481	Transmembrane	0.0015	0.0504	0.9481	0.794157	0.0232068	-1.25949	-0.793628	+		+	2784130	NA	376641	NA	3	0	2	1	7	2	0	0	0	0	0	11044000	23840000	33020000	15895000	0	0
A0A096MIX2	DEAD (Asp-Glu-Ala-Asp) box polypeptide 17, isoform CRA_a (DEAD-box helicase 17)	Ddx17	9	6	6	17.9	72.644	0	15.819	233790000	23					Intracellular	0.8792	Intracellular	0.9184	0	0.0815	5.09301	0	-3.63524	-3.43426	+		+	6874320	NA	603595	NA	4	0	6	4	6	7	0	0	0	0	0	52838000	54677000	70244000	56036000	0	0
A0A096MJA9	Aspartate-beta-hydroxylase	Asph	13	13	13	29.1	74.889	0	138.72	799720000	69	+	+			Signal-peptide	0.6529	Signal-peptide	0.191	0.6529	0.1561	4.41702	0	-4.68687	-3.79208	+		+	23164000	NA	6044820	NA	4	0	10	13	20	26	0	0	0	0	0	160310000	166560000	184240000	266790000	0	14266000
A0A096MK61	Cartilage-associated protein-like 1 (Similar to Cartilage-associated protein (Predicted), isoform CRA_b)	Crtapl1	14	14	14	46.7	46.49	0	49.936	889060000	54	+			+	Signal-peptide	0.969	Signal-peptide	0.0079	0.969	0.0231	3.58679	0	-4.27127	-3.14596	+		+	24579700	2099700	8803930	NA	4	1	12	9	21	12	0	0	0	0	0	179220000	193800000	358160000	151530000	0	0
A0A096MK75	Ras homolog family member G (Fragment)	Rhog	5	4	4	43.3	19.872	0	21.361	74967000	11					UPS	0.5529	Intracellular	0.8211	0.0025	0.1764	1.79349	0.0010859	-1.77821	-1.33071	+		+	2209970	NA	579022	NA	4	0	3	4	0	4	0	0	0	0	0	12776000	22480000	19929000	19783000	0	0
A0A096MKC0	GYF domain-containing protein (Fragment)	Gigyf2	2	2	2	5	83.432	0	5.8178	19006000	8					Intracellular	0.8761	Intracellular	0.875	0	0.125	0.241462	0.437437	0.333947	0.245343				609094	NA	72121.5	NA	3	0	2	2	3	1	0	0	0	0	0	5071000	4825300	5982200	3127200	0	0
A0A096MKH2	Similar to RIKEN cDNA 1110059P08 (Vesicle-trafficking 1)	Vta1	2	2	2	7.1	33.975	0.00044267	4.2442	109770000	10					UPS	0.5922	Intracellular	0.796	0.001	0.203	1.3002	0.00152529	-2.04335	-1.24933	+		+	3500970	NA	1369020	NA	3	0	2	1	2	3	0	0	1	0	1	28413000	22448000	20640000	34764000	0	0
A0A0G2JTY6	G-rich RNA sequence-binding factor 1	Grsf1	4	4	4	23.6	43.549	0	10.48	90795000	12					Intracellular	0.5668	Intracellular	0.385	0.3469	0.2681	2.65854	0.000498127	-1.93465	-1.6417	+		+	2690100	NA	937396	NA	4	0	3	4	3	2	0	0	0	0	0	24061000	33290000	16410000	17033000	0	0
A0A0G2JUA5	AHNAK nucleoprotein	Ahnak	177	177	177	67	581.12	0	323.31	47500000000	841					Intracellular	0.7611	Intracellular	0.9983	0.0001	0.0015	4.47396	0	-7.57659	-5.08884	+		+	1367720000	11516000	195612000	3101740	4	3	225	207	189	210	0	3	4	0	3	12100000000	14000000000	10500000000	10700000000	23257000	32671000
A0A0G2JUV4	Mitochondrial ribosomal protein L1	Mrpl1	2	2	2	12.1	33.443	0	7.4586	48421000	5					UPS	0.5509	Intracellular	0.9951	0.0001	0.0048	1.07164	0.0327661	-0.918667	-0.737606	+		+	1657570	NA	330802	NA	3	0	1	2	0	2	0	0	0	0	0	10888000	17001000	7505100	13028000	0	0
A0A0G2JVH7	WASP family member 2	Wasf2	3	3	3	12.2	45.338	0	8.2895	79724000	11					Intracellular	0.6809	Intracellular	0.9503	0.0001	0.0496	2.18166	0.00085588	-1.93253	-1.51581	+		+	2326880	NA	603778	NA	4	0	2	1	5	3	0	0	0	0	0	14898000	13063000	30953000	20810000	0	0
A0A0G2JVM2	Uncharacterized protein	Mia3	6	6	6	7.6	153.47	0	32.673	125280000	13		+			Intracellular	0.7337	Intracellular	0.9237	0	0.0763	2.14889	0.000577697	-2.0826	-1.57736	+		+	3627450	NA	1294530	NA	4	0	3	2	6	2	0	0	0	0	0	29256000	32263000	47675000	16086000	0	0
A0A0G2JWA8	Microtubule-actin cross-linking factor 1	Macf1	29	29	6	7.1	830.73	0	168.07	303280000	59					Intracellular	0.7344	Intracellular	0.883	0	0.117	3.30855	8.9e-05	-3.26286	-2.55087	+		+	8542000	NA	2731730	NA	4	0	8	11	34	6	0	0	0	0	0	46341000	44142000	167570000	42242000	0	519980
A0A0G2JWD6	AP-3 complex subunit beta	Ap3b1	8	8	8	10.2	121.5	0	19.243	165000000	28					Intracellular	0.5196	Intracellular	0.7479	0.0001	0.252	3.7013	0.000156206	-2.66532	-2.35491	+		+	4834550	NA	328724	NA	4	0	3	8	8	9	0	0	0	0	0	31561000	41171000	53179000	39088000	0	0
A0A0G2JX72	Muscleblind-like-splicing regulator 1	Mbnl1	3	3	1	6.4	47.203	0.0004279	3.8452	237330000	6					Intracellular	0.6935	Intracellular	0.9187	0.0009	0.0804	3.25335	0.000149533	-2.79414	-2.29011	+		+	6999400	NA	980795	NA	4	0	1	2	2	1	0	0	0	0	0	55580000	74679000	57249000	49824000	0	0
A0A0G2JXC2	Formin-like 3	Fmnl3	2	2	2	3.5	106.96	0	5.054	33044000	8					Intracellular	0.5705	Intracellular	0.9416	0	0.0584	1.88288	0.0138516	-0.949479	-0.885205	+		+	981363	NA	190789	NA	4	0	2	2	2	2	0	0	0	0	0	9262200	6950300	7862100	8969500	0	0
A0A0G2JYL4	Prolyl 4-hydroxylase subunit alpha 2	P4ha2	18	18	18	51.2	60.635	0	132.86	2136700000	94	+			+	Signal-peptide	0.8217	Signal-peptide	0.0585	0.8217	0.1198	3.84462	0	-5.21828	-3.69485	+		+	60859700	3286600	31469200	NA	4	1	16	20	34	22	0	1	0	0	1	364160000	455130000	906900000	401420000	0	1071600
G3V6X1	Fibulin 2 (Fibulin 2, isoform CRA_a)	Fbln2	39	39	39	49.1	131.3	0	323.31	9656500000	317	+			+	Signal-peptide	0.9927	Signal-peptide	0.0006	0.9927	0.0067	0.183353	0.264884	1.42567	0.3713				116228000	683393000	78970200	339376000	4	3	47	48	0	42	0	74	68	0	38	1219800000	1287300000	6400100	906750000	0	2691200000
Q5XIH1	Asporin	Aspn	7	7	7	26.7	42.767	0	19.459	335920000	31	+			+	Signal-peptide	0.6333	Signal-peptide	0.1885	0.6333	0.1782	0.242545	0.228518	1.01202	0.405777				4072650	25149300	1633160	6041000	4	3	2	2	0	1	0	8	7	0	11	13605000	36843000	12373000	37996000	0	107910000
Q642B0	Glypican 4	Gpc4	15	15	13	40.4	62.561	0	39.998	1044600000	65	+			+	Signal-peptide	0.9592	Signal-peptide	0.0008	0.9592	0.04	1.19233	0.0729103	0.674149	0.614087				18835300	28692700	7664540	4715110	4	4	3	6	18	8	0	4	5	11	10	82885000	122740000	327990000	173850000	0	58403000
Q5M849	Interferon-induced protein 35 (Interferon-induced protein 35, isoform CRA_a)	Ifi35	2	2	2	12.6	31.764	0	8.8677	16447000	7					UPS	0.5519	Intracellular	0.8404	0.0015	0.1581	1.3619	0.0815641	0.62389	0.597244				567903	NA	99644.9	NA	3	0	0	2	1	4	0	0	0	0	0	1957800	4421900	4638200	5429100	0	0
D3Z9E1	Elastin microfibril interfacer 1 (Elastin microfibril interfacer 1 (Predicted), isoform CRA_b)	Emilin1	29	29	29	46.8	94.504	0	174.15	1869600000	124					Intracellular	0.6528	Intracellular	0.9806	0.0004	0.019	0.599797	0.183759	0.561809	0.452134				34550500	52907300	12403300	28873800	4	4	21	13	22	8	0	16	9	30	5	425820000	241890000	418470000	107770000	0	108380000
A0A0G2JZF0	SEC24 homolog C, COPII coat complex component	Sec24c	8	8	8	12.6	114.7	0	16.878	216040000	23					Intracellular	0.5636	Intracellular	0.8505	0.0016	0.1479	3.54389	0.000212658	-2.50926	-2.21359	+		+	6307180	NA	870948	NA	4	0	3	5	6	9	0	0	0	0	0	51166000	39966000	72290000	51624000	0	989410
D3ZPJ9	Activating signal cointegrator 1 complex subunit 2	Ascc2	2	2	2	6.7	85.695	0	7.4662	13119000	5					Intracellular	0.68	Intracellular	0.7706	0.0002	0.2293	0.590203	0.206287	0.519481	0.427668				438137	NA	22945.3	NA	3	0	0	1	2	2	0	0	0	0	0	3741600	3782100	3856300	1739000	0	0
Q5U2R9	Sec1 family domain-containing 2 (Similar to Sec1 family domain containing protein 2 (Syntaxin binding protein 1-like 1) (Neuronal Sec1))	Scfd2	5	5	5	11.5	74.794	0	13.345	24760000	7					Intracellular	0.5613	Intracellular	0.9354	0.0124	0.0522	0.348014	0.31168	0.449473	0.33178				771357	NA	160731	NA	3	0	2	1	2	2	0	0	0	0	0	7307800	5986200	6704300	4762000	0	0
A0A0G2JZH8	Dihydrolipoamide acetyltransferase component of pyruvate dehydrogenase complex (EC 2.3.1.-)	Pdhx	3	3	3	8	54.169	0.00044944	4.5124	114080000	6					Intracellular	0.563	Intracellular	0.8338	0.0197	0.1464	0.556081	0.0594446	-1.11608	-0.643065				3752100	NA	795641	NA	3	0	1	2	0	3	0	0	0	0	0	31937000	33444000	21567000	27127000	0	0
D4A510	SWI/SNF-related, matrix-associated, actin-dependent regulator of chromatin, subfamily c, member 2	Smarcc2	3	3	3	6.3	124.74	0	33.751	29247000	15					Intracellular	0.6786	Intracellular	0.8948	0.0394	0.0657	0.195529	0.440283	0.381997	0.243304				1080770	NA	73751.5	NA	3	0	4	6	1	4	0	0	0	0	0	7075900	10226000	2632100	9312800	0	0
D3ZA22	Similar to Tripartite motif protein 47 (Tripartite motif-containing 47)	Trim47	3	3	3	9.2	70.027	0	7.7091	19874000	11					Intracellular	0.8793	Intracellular	0.9245	0.0464	0.0292	0.302967	0.399253	0.344733	0.269778				674857	NA	175528	NA	3	0	3	0	3	5	0	0	0	0	0	4321000	5354300	3334600	6864500	0	0
A0A0G2JZI2	Glutamyl-prolyl-tRNA synthetase	Eprs	60	60	60	56	169.86	0	323.31	7100500000	242					Intracellular	0.6589	Intracellular	0.8873	0.0466	0.0662	2.91411	0.000111776	-4.74809	-2.91719	+		+	198690000	9604970	65820400	6376060	4	4	39	56	71	63	0	1	5	0	7	1205700000	1340800000	2721500000	1721100000	0	30436000
D3ZZT9	Collagen type XIV alpha 1 chain	Col14a1	30	30	30	31.4	192.56	0	267.82	1067200000	156	+			+	Transmembrane	0.5257	Transmembrane	0.0011	0.4733	0.5257	0.0644172	0.697213	0.27412	0.118538				27236700	40060000	2994170	895339	3	3	24	30	0	29	0	26	21	0	26	215990000	244700000	0	273410000	0	107600000
[truncated: 459 more rows]
[truncated: 11 more columns]
